# Supplementary material for: Overexpression of Water-Responsive Genes Promoted by Elevated CO2 Reduces ROS and Enhances Drought Tolerance in Coffea Species
Source: MDPI journal article supplement (doi:10.3390/ijms24043210), 2023-02-06
Supplement: s1 [file s1]

**Table S2.** Summary of sequencing and mapping of reads from *Coffea arabica* cv. Icatu (Icatu) and *C. canephora* cv. CL153 (CL153) grown under moderate water deficit (MWD) or severe water deficit (SWD), and control well-watered plants, either under ambient 380  $\mu\text{L L}^{-1}$  [ $\text{CO}_2$ ] (aCO<sub>2</sub>) or elevated 700  $\mu\text{L L}^{-1}$  [ $\text{CO}_2$ ] (eCO<sub>2</sub>) at 25/20 °C (day/night). Raw reads: number of reads obtained after sequencing. Uniquely mapped reads: number of reads aligned to a unique position. % Unique: proportion of reads aligned to a unique position compared to the number of raw reads. Multiple mapped reads: number of reads aligned to exons of several overlapping genes. % Multiple: proportion of reads aligned to exons of several overlapping genes compared to the number of raw reads. Unmapped reads: number of non-aligning reads. % Unmapped: proportion of non-aligning reads compared to the number of raw reads.

| Genotype | [CO <sub>2</sub> ] | Water | Replicates | Raw reads | Uniquely mapped reads | % Unique | Multiple mapped reads | % Multiple | Unmapped reads | % Unmapped |
|----------|--------------------|-------|------------|-----------|-----------------------|----------|-----------------------|------------|----------------|------------|
| CL153    | aCO <sub>2</sub>   | WW    | 1A         | 21337820  | 17963999              | 84,19    | 1068388               | 5,01       | 2305433        | 10,8       |
|          |                    |       | 1B         | 19886216  | 17435088              | 87,67    | 594232                | 2,99       | 1856896        | 9,34       |
|          |                    |       | 1C         | 23700779  | 19903897              | 83,98    | 954339                | 4,03       | 2842543        | 11,99      |
|          |                    | MWD   | 2A         | 19019627  | 16370474              | 86,07    | 648828                | 3,41       | 2000325        | 10,51      |
|          |                    |       | 2B         | 29050476  | 23285935              | 80,16    | 1276101               | 4,4        | 4488440        | 15,45      |
|          |                    |       | 2C         | 43271586  | 34861296              | 80,56    | 1870546               | 4,32       | 6539744        | 15,11      |
|          |                    | SWD   | 3A         | 21944385  | 20038816              | 91,32    | 712260                | 3,25       | 1193309        | 5,44       |
|          |                    |       | 3B         | 25523224  | 22250344              | 87,18    | 1051098               | 4,12       | 2221782        | 8,71       |
|          |                    |       | 3C         | 21988087  | 17169084              | 78,08    | 859075                | 3,91       | 3959928        | 18,01      |
|          | eCO <sub>2</sub>   | WW    | 4A         | 22261883  | 16699464              | 75,01    | 1257695               | 5,65       | 4304724        | 19,34      |
|          |                    |       | 4B         | 20883146  | 16062375              | 76,92    | 944211                | 4,52       | 3876560        | 18,56      |
|          |                    |       | 4C         | 22273972  | 18149138              | 81,48    | 1071574               | 4,81       | 3053260        | 13,70      |
|          |                    | MWD   | 5A         | 20298860  | 16791383              | 82,72    | 689625                | 3,4        | 2817852        | 13,88      |
|          |                    |       | 5B         | 27587772  | 22173217              | 80,37    | 1034732               | 3,75       | 4379823        | 15,88      |
|          |                    |       | 5D         | 27609922  | 22106658              | 80,07    | 908956                | 3,29       | 4594308        | 16,64      |
|          |                    | SWD   | 6A         | 19825056  | 16053978              | 80,98    | 722511                | 3,64       | 3048567        | 15,37      |

|       |                  |     |          |          |          |         |         |         |         |       |
|-------|------------------|-----|----------|----------|----------|---------|---------|---------|---------|-------|
| Icatu |                  | 6B  | 16377814 | 12186531 | 74,41    | 630264  | 3,85    | 3561019 | 21,74   |       |
|       |                  | 6C  | 21411839 | 16674575 | 77,88    | 772276  | 3,61    | 3964988 | 18,52   |       |
|       | Average          |     | 23569581 | 19232014 | 82       | 948151  | 4       | 3389417 | 14      |       |
|       | aCO <sub>2</sub> | WW  | 7A       | 26528307 | 19715321 | 74,32   | 1834267 | 6,91    | 4978719 | 1,47  |
|       |                  |     | 7B       | 22009479 | 17253113 | 78,39   | 746742  | 3,4     | 4007205 | 18,2  |
|       |                  |     | 7C       | 18666431 | 15290046 | 81,91   | 1003935 | 5,38    | 2372450 | 12,7  |
|       |                  | MWD | 8A       | 20273543 | 16298660 | 80,39   | 1111168 | 5,48    | 2863715 | 14,13 |
|       |                  |     | 20B      | 19550984 | 15205721 | 77,77   | 928936  | 4,75    | 3416327 | 17,47 |
|       |                  |     | 20C      | 24311127 | 18052291 | 74,26   | 1097624 | 4,52    | 5161212 | 21,23 |
|       |                  | SWD | 9B       | 19857280 | 15543358 | 78,28   | 810497  | 4,08    | 3503425 | 17,64 |
|       |                  |     | 9C       | 21199998 | 15184071 | 71,62   | 1173187 | 5,54    | 4842740 | 22,84 |
|       |                  |     | 9E       | 34865625 | 26076327 | 74,79   | 2187875 | 6,28    | 6601423 | 18,93 |
|       | eCO <sub>2</sub> | WW  | 10A      | 23205533 | 18854251 | 81,25   | 1449795 | 6,26    | 2898972 | 12,5  |
|       |                  |     | 10B      | 21050167 | 17086784 | 81,17   | 822286  | 3,91    | 3141097 | 14,92 |
|       |                  |     | 10C      | 20541822 | 16146299 | 78,6    | 1170402 | 5,69    | 3225121 | 15,7  |
|       |                  | MWD | 11B      | 22590411 | 16234957 | 71,87   | 2353705 | 10,42   | 4001749 | 17,71 |
|       |                  |     | 11C      | 22711749 | 16458232 | 72,47   | 1894644 | 8,34    | 4358873 | 19,19 |
|       |                  |     | 11D      | 22099401 | 16303417 | 73,77   | 1730672 | 7,83    | 4065312 | 18,4  |
|       |                  | SWD | 12B      | 19703228 | 15925812 | 80,83   | 1187218 | 6,02    | 2590198 | 13,14 |
|       |                  |     | 12C      | 17710079 | 13447037 | 75,93   | 1075593 | 6,07    | 3187449 | 17,99 |
|       |                  |     | 12D      | 17091236 | 14668143 | 85,82   | 664943  | 3,89    | 1758150 | 10,28 |
|       | Average          |     | 21887022 | 16874658 | 77       | 1291305 | 6       | 3720785 | 16      |       |
