# Supplementary material for: Overexpression of Water-Responsive Genes Promoted by Elevated CO2 Reduces ROS and Enhances Drought Tolerance in Coffea Species
Source: MDPI journal article supplement (doi:10.3390/ijms24043210), 2023-02-06
Supplement: s1 [file s1]

**Table S3.** Number of total expressed genes in *Coffea arabica* cv. Icatu (Icatu) and *C. canephora* cv. CL153 (CL153), number of differentially expressed genes (DEGs) detected by DESeq2 and edgeR, with log2 fold-change (FC)  $\neq 0$  and false discovery rate (FDR)  $< 0.01$ , and number of overlapping DEGs from both analyses (% DEGs relative to the average of genes expressed by treated and control plants). Plants were grown in three different water conditions, well-watered (control), moderate water deficit (MWD), and severe water deficit (SWD), under either ambient air 380  $\mu\text{L L}^{-1}$  [ $\text{CO}_2$ ] (aCO<sub>2</sub>) or elevated 700  $\mu\text{L L}^{-1}$  [ $\text{CO}_2$ ] (eCO<sub>2</sub>), at 25/20 °C (day/night). DEGs represent the number of significant genes found to be differently expressed between each stress water treatment and the control (respectively, MWD vs. WW and SWD vs. WW) [overlap % is the proportion of DEGs detected by both edgeR and DESeq2 related to the average of genes expressed by control and treated plants].

| Genotype | Water | [CO <sub>2</sub> ] | Expressed genes |       | DEGs   |       |            |       |     |      |
|----------|-------|--------------------|-----------------|-------|--------|-------|------------|-------|-----|------|
|          |       |                    | Control         | Test  | DESeq2 | edgeR | Overlapped |       |     |      |
|          |       |                    |                 |       |        |       | Total      | %     | Up  | Down |
| Icatu    | MWD   | aCO <sub>2</sub>   | 29519           | 29960 | 714    | 1026  | 548        | 1.84  | 66  | 482  |
|          |       | eCO <sub>2</sub>   | 31041           | 29223 | 47     | 227   | 35         | 0.12  | 27  | 8    |
|          | SWD   | aCO <sub>2</sub>   | 29519           | 29199 | 2259   | 2436  | 1673       | 5.70  | 313 | 1360 |
|          |       | eCO <sub>2</sub>   | 31041           | 29222 | 3670   | 3810  | 2940       | 9.76  | 859 | 2081 |
| CL153    | MWD   | aCO <sub>2</sub>   | 20463           | 20001 | 953    | 1165  | 704        | 3.48  | 295 | 409  |
|          |       | eCO <sub>2</sub>   | 19818           | 19912 | 71     | 284   | 47         | 0.24  | 17  | 30   |
|          | SWD   | aCO <sub>2</sub>   | 20463           | 20348 | 3251   | 3150  | 2576       | 12.62 | 725 | 1851 |
|          |       | eCO <sub>2</sub>   | 19818           | 19558 | 2793   | 2691  | 2040       | 10.36 | 768 | 1272 |
