# Supplementary material for: Overexpression of Water-Responsive Genes Promoted by Elevated CO2 Reduces ROS and Enhances Drought Tolerance in Coffea Species
Source: MDPI journal article supplement (doi:10.3390/ijms24043210), 2023-02-06
Supplement: s1 [file s1]

**Table S12.** Significantly ( $g:SCS < 0.01$ ) enriched Gene Ontology (GO) terms of the three main categories – Biological Process (GO:BP), Molecular Function (GO:MF) and Cellular Component (GO:CC) – among up- and down-regulated Differentially Expressed Genes (DEGs) found in *Coffea canephora* cv. CL153 (CL153) plants grown under moderate water deficit (MWD) or severe water deficit (SWD), in comparison with well-watered control plants, under ambient air 380  $\mu\text{L L}^{-1}$  [ $\text{CO}_2$ ] (a $\text{CO}_2$ ) or elevated 700  $\mu\text{L L}^{-1}$  [ $\text{CO}_2$ ] (e $\text{CO}_2$ ), at 25/20 °C (day/night). DEGs were ranked by increasing log2 fold-change (FC) and an Over-representation analysis (ORA) was performed using gProfiler, against *C. arabica* functional annotation. Counts indicate the total number of DEGs annotated with each GO term.

| [CO <sub>2</sub> ] | Water | Category | ID         | Description                                     | Counts | FDR      |
|--------------------|-------|----------|------------|-------------------------------------------------|--------|----------|
| aCO <sub>2</sub>   | MWD   |          |            | Down                                            |        |          |
|                    |       | BP       | GO:0071555 | cell wall organization                          | 15     | 4.57E-06 |
|                    |       | BP       | GO:0045229 | external encapsulating structure organization   | 15     | 7.54E-06 |
|                    |       | BP       | GO:0009664 | plant-type cell wall organization               | 7      | 4.66E-05 |
|                    |       | BP       | GO:0071554 | cell wall organization or biogenesis            | 15     | 5.51E-05 |
|                    |       | BP       | GO:0071669 | plant-type cell wall organization or biogenesis | 7      | 5.41E-04 |
|                    |       | BP       | GO:0009733 | response to auxin                               | 11     | 8.98E-04 |
|                    |       | BP       | GO:0006810 | transport                                       | 46     | 5.04E-03 |
|                    |       | BP       | GO:0051234 | establishment of localization                   | 46     | 6.10E-03 |
|                    |       | BP       | GO:0030001 | metal ion transport                             | 10     | 7.31E-03 |
|                    |       | BP       | GO:0051179 | localization                                    | 46     | 8.27E-03 |
|                    |       | BP       | GO:0055085 | transmembrane transport                         | 30     | 9.75E-03 |
|                    |       | BP       | GO:0055114 | obsolete oxidation-reduction process            | 7      | 2.76E-03 |
|                    |       | CC       | GO:0005618 | cell wall                                       | 13     | 3.00E-07 |
|                    |       | CC       | GO:0030312 | external encapsulating structure                | 13     | 3.87E-07 |
|                    |       | CC       | GO:0005576 | extracellular region                            | 16     | 9.51E-05 |
|                    |       | CC       | GO:0071944 | cell periphery                                  | 23     | 1.49E-03 |
|                    |       | MF       | GO:0022857 | transmembrane transporter activity              | 31     | 4.10E-03 |
|                    |       | MF       | GO:0005215 | transporter activity                            | 31     | 6.46E-03 |
|                    |       |          |            | Up                                              |        |          |
|                    |       | MF       | GO:0003700 | DNA-binding transcription factor activity       | 16     | 1.16E-03 |
|                    |       | MF       | GO:0016491 | oxidoreductase activity                         | 7      | 2.73E-03 |

|     |      |            |                                                 |     |          |
|-----|------|------------|-------------------------------------------------|-----|----------|
|     | MF   | GO:0050660 | flavin adenine dinucleotide binding             | 3   | 3.90E-03 |
|     | MF   | GO:0140110 | transcription regulator activity                | 16  | 4.95E-03 |
|     | MF   | GO:0004190 | aspartic-type endopeptidase activity            | 7   | 8.00E-03 |
|     | MF   | GO:0070001 | aspartic-type peptidase activity                | 7   | 8.00E-03 |
| SWD | Down |            |                                                 |     |          |
|     | BP   | GO:0015979 | photosynthesis                                  | 44  | 2.49E-23 |
|     | BP   | GO:0019684 | photosynthesis light reaction                   | 20  | 3.61E-10 |
|     | BP   | GO:0005976 | polysaccharide metabolic process                | 22  | 9.70E-10 |
|     | BP   | GO:0009765 | photosynthesis light harvesting                 | 12  | 6.53E-09 |
|     | BP   | GO:0071555 | cell wall organization                          | 21  | 6.96E-09 |
|     | BP   | GO:0045229 | external encapsulating structure organization   | 21  | 1.35E-08 |
|     | BP   | GO:0071554 | cell wall organization or biogenesis            | 24  | 1.67E-08 |
|     | BP   | GO:0018298 | protein-chromophore linkage                     | 13  | 1.91E-07 |
|     | BP   | GO:0009664 | plant-type cell wall organization               | 10  | 3.19E-07 |
|     | BP   | GO:0071669 | plant-type cell wall organization or biogenesis | 11  | 9.14E-07 |
|     | BP   | GO:0006468 | protein phosphorylation                         | 130 | 3.04E-06 |
|     | BP   | GO:0044264 | cellular polysaccharide metabolic process       | 13  | 1.22E-05 |
|     | BP   | GO:0044042 | glucan metabolic process                        | 12  | 1.80E-05 |
|     | BP   | GO:0006073 | cellular glucan metabolic process               | 12  | 1.80E-05 |
|     | BP   | GO:0009733 | response to auxin                               | 22  | 2.81E-05 |
|     | BP   | GO:0000272 | polysaccharide catabolic process                | 11  | 4.98E-05 |
|     | BP   | GO:0030243 | cellulose metabolic process                     | 8   | 1.46E-04 |
|     | BP   | GO:0010393 | galacturonan metabolic process                  | 10  | 1.53E-04 |
|     | BP   | GO:0045488 | pectin metabolic process                        | 10  | 1.53E-04 |
|     | BP   | GO:0016310 | phosphorylation                                 | 140 | 1.85E-04 |
|     | BP   | GO:0044262 | cellular carbohydrate metabolic process         | 14  | 3.10E-04 |
|     | BP   | GO:0005975 | carbohydrate metabolic process                  | 83  | 3.56E-04 |
|     | BP   | GO:0042546 | cell wall biogenesis                            | 9   | 3.63E-04 |
|     | BP   | GO:0051273 | beta-glucan metabolic process                   | 8   | 5.91E-04 |
|     | BP   | GO:0009734 | auxin-activated signaling pathway               | 18  | 6.64E-04 |
|     | BP   | GO:0071365 | cellular response to auxin stimulus             | 18  | 8.80E-04 |

|    |            |                                                |     |          |
|----|------------|------------------------------------------------|-----|----------|
| BP | GO:0009719 | response to endogenous stimulus                | 25  | 1.17E-03 |
| BP | GO:0009725 | response to hormone                            | 25  | 1.17E-03 |
| BP | GO:0030244 | cellulose biosynthetic process                 | 13  | 1.78E-03 |
| BP | GO:0045490 | pectin catabolic process                       | 8   | 1.85E-03 |
| BP | GO:0034637 | cellular carbohydrate biosynthetic process     | 25  | 3.49E-03 |
| BP | GO:0008150 | biological_process                             | 879 | 4.60E-03 |
| BP | GO:0010410 | hemicellulose metabolic process                | 6   | 5.08E-03 |
| BP | GO:0006091 | generation of precursor metabolites and energy | 38  | 5.33E-03 |
| BP | GO:0010033 | response to organic substance                  | 26  | 9.61E-03 |
| CC | GO:0009521 | photosystem                                    | 32  | 1.72E-20 |
| CC | GO:0009522 | photosystem I                                  | 21  | 1.74E-16 |
| CC | GO:0009579 | thylakoid                                      | 51  | 4.94E-16 |
| CC | GO:0034357 | photosynthetic membrane                        | 44  | 1.37E-15 |
| CC | GO:0009523 | photosystem II                                 | 23  | 3.89E-12 |
| CC | GO:0042651 | thylakoid membrane                             | 37  | 4.62E-11 |
| CC | GO:0071944 | cell periphery                                 | 60  | 7.67E-09 |
| CC | GO:0031224 | intrinsic component of membrane                | 432 | 1.10E-08 |
| CC | GO:0016020 | membrane                                       | 487 | 1.20E-08 |
| CC | GO:0016021 | integral component of membrane                 | 430 | 2.00E-08 |
| CC | GO:0005618 | cell wall                                      | 21  | 4.32E-08 |
| CC | GO:0055035 | plastid thylakoid membrane                     | 30  | 4.37E-08 |
| CC | GO:0009535 | chloroplast thylakoid membrane                 | 32  | 4.97E-08 |
| CC | GO:0031976 | plastid thylakoid                              | 32  | 1.29E-07 |
| CC | GO:0030312 | external encapsulating structure               | 20  | 4.45E-07 |
| CC | GO:0009534 | chloroplast thylakoid                          | 31  | 5.97E-07 |
| CC | GO:0005576 | extracellular region                           | 44  | 1.42E-06 |
| CC | GO:0005886 | plasma membrane                                | 75  | 7.16E-05 |
| CC | GO:0009538 | photosystem I reaction center                  | 5   | 1.27E-03 |
| CC | GO:0048046 | apoplast                                       | 10  | 1.73E-03 |
| MF | GO:0003824 | catalytic activity                             | 760 | 1.00E-12 |
| MF | GO:0016168 | chlorophyll binding                            | 12  | 2.73E-09 |

|                  |     |      |            |                                                                                                 |     |          |
|------------------|-----|------|------------|-------------------------------------------------------------------------------------------------|-----|----------|
|                  |     | MF   | GO:0016740 | transferase activity                                                                            | 321 | 1.23E-05 |
|                  |     | MF   | GO:0004672 | protein kinase activity                                                                         | 125 | 2.86E-05 |
|                  |     | MF   | GO:0008194 | UDP-glycosyltransferase activity                                                                | 57  | 3.56E-05 |
|                  |     | MF   | GO:0016798 | hydrolase activity acting on glycosyl bonds                                                     | 36  | 5.82E-05 |
|                  |     | MF   | GO:0004553 | hydrolase activity hydrolyzing O-glycosyl compounds                                             | 34  | 9.25E-05 |
|                  |     | MF   | GO:0016758 | transferase activity transferring hexosyl groups                                                | 67  | 1.00E-04 |
|                  |     | MF   | GO:0016682 | oxidoreductase activity acting on diphenols and related substances as donors oxygen as acceptor | 6   | 1.33E-04 |
|                  |     | MF   | GO:0016679 | oxidoreductase activity acting on diphenols and related substances as donors                    | 6   | 1.65E-04 |
|                  |     | MF   | GO:0016773 | phosphotransferase activity alcohol group as acceptor                                           | 127 | 1.19E-03 |
|                  |     | MF   | GO:0008146 | sulfotransferase activity                                                                       | 8   | 1.48E-03 |
|                  |     | MF   | GO:0016759 | cellulose synthase activity                                                                     | 10  | 1.78E-03 |
|                  |     | MF   | GO:0016760 | cellulose synthase (UDP-forming) activity                                                       | 10  | 1.78E-03 |
|                  |     | MF   | GO:0016757 | transferase activity transferring glycosyl groups                                               | 73  | 4.04E-03 |
|                  |     | MF   | GO:0016301 | kinase activity                                                                                 | 132 | 5.14E-03 |
|                  |     | MF   | GO:0004097 | catechol oxidase activity                                                                       | 3   | 5.44E-03 |
|                  |     | MF   | GO:0046527 | glucosyltransferase activity                                                                    | 17  | 6.07E-03 |
|                  |     | Up   |            |                                                                                                 |     |          |
|                  |     | MF   | GO:0016491 | oxidoreductase activity                                                                         | 46  | 3.21E-03 |
|                  |     | MF   | GO:0050660 | flavin adenine dinucleotide binding                                                             | 3   | 9.00E-03 |
| eCO <sub>2</sub> | MWD | Down |            |                                                                                                 |     |          |
|                  |     | BP   | GO:0009664 | plant-type cell wall organization                                                               | 3   | 4.15E-03 |
|                  | SWD | Down |            |                                                                                                 |     |          |
|                  |     | BP   | GO:0015979 | photosynthesis                                                                                  | 44  | 1.77E-27 |
|                  |     | BP   | GO:0006091 | generation of precursor metabolites and energy                                                  | 43  | 3.01E-10 |
|                  |     | BP   | GO:0019684 | photosynthesis light reaction                                                                   | 18  | 3.15E-09 |
|                  |     | BP   | GO:0009765 | photosynthesis light harvesting                                                                 | 9   | 6.39E-06 |
|                  |     | BP   | GO:0005975 | carbohydrate metabolic process                                                                  | 77  | 9.53E-06 |
|                  |     | BP   | GO:0071555 | cell wall organization                                                                          | 16  | 2.62E-05 |
|                  |     | BP   | GO:0045229 | external encapsulating structure organization                                                   | 16  | 4.04E-05 |
|                  |     | BP   | GO:0071554 | cell wall organization or biogenesis                                                            | 17  | 1.18E-04 |

|    |            |                                                     |     |          |
|----|------------|-----------------------------------------------------|-----|----------|
| BP | GO:0009664 | plant-type cell wall organization                   | 7   | 1.60E-04 |
| BP | GO:0018298 | protein-chromophore linkage                         | 11  | 2.30E-04 |
| BP | GO:0010258 | NADH dehydrogenase complex (plastoquinone) assembly | 4   | 1.06E-03 |
| BP | GO:0072330 | monocarboxylic acid biosynthetic process            | 17  | 1.79E-03 |
| BP | GO:0071669 | plant-type cell wall organization or biogenesis     | 7   | 2.05E-03 |
| BP | GO:0008610 | lipid biosynthetic process                          | 31  | 2.22E-03 |
| BP | GO:0010065 | primary meristem tissue development                 | 3   | 4.34E-03 |
| BP | GO:0006633 | fatty acid biosynthetic process                     | 15  | 5.01E-03 |
| BP | GO:0008150 | biological_process                                  | 614 | 5.35E-03 |
| BP | GO:0010207 | photosystem II assembly                             | 5   | 5.92E-03 |
| CC | GO:0009579 | thylakoid                                           | 61  | 6.33E-33 |
| CC | GO:0034357 | photosynthetic membrane                             | 52  | 4.42E-29 |
| CC | GO:0042651 | thylakoid membrane                                  | 48  | 3.18E-26 |
| CC | GO:0009521 | photosystem                                         | 31  | 5.92E-23 |
| CC | GO:0009535 | chloroplast thylakoid membrane                      | 42  | 8.20E-22 |
| CC | GO:0031976 | plastid thylakoid                                   | 41  | 4.26E-20 |
| CC | GO:0009507 | chloroplast                                         | 95  | 2.21E-19 |
| CC | GO:0009534 | chloroplast thylakoid                               | 40  | 4.22E-19 |
| CC | GO:0055035 | plastid thylakoid membrane                          | 38  | 4.34E-19 |
| CC | GO:0009536 | plastid                                             | 92  | 1.68E-17 |
| CC | GO:0009523 | photosystem II                                      | 24  | 3.42E-16 |
| CC | GO:0009522 | photosystem I                                       | 17  | 1.28E-14 |
| CC | GO:0005576 | extracellular region                                | 31  | 1.48E-07 |
| CC | GO:0005618 | cell wall                                           | 16  | 2.13E-07 |
| CC | GO:0009654 | photosystem II oxygen evolving complex              | 11  | 3.77E-07 |
| CC | GO:0098796 | membrane protein complex                            | 38  | 8.68E-07 |
| CC | GO:0030312 | external encapsulating structure                    | 15  | 2.55E-06 |
| CC | GO:0009941 | chloroplast envelope                                | 28  | 8.49E-06 |
| CC | GO:1990204 | oxidoreductase complex                              | 14  | 2.62E-05 |
| CC | GO:0009538 | photosystem I reaction center                       | 5   | 4.36E-05 |
| CC | GO:0009526 | plastid envelope                                    | 26  | 8.52E-05 |

|    |            |                                                                |     |          |
|----|------------|----------------------------------------------------------------|-----|----------|
| CC | GO:0016020 | membrane                                                       | 363 | 5.65E-04 |
| CC | GO:0031984 | organelle subcompartment                                       | 53  | 9.88E-04 |
| CC | GO:0071944 | cell periphery                                                 | 25  | 5.56E-03 |
| MF | GO:0016168 | chlorophyll binding                                            | 9   | 3.63E-06 |
| MF | GO:0016798 | hydrolase activity acting on glycosyl bonds                    | 24  | 1.23E-05 |
| MF | GO:0004553 | hydrolase activity hydrolyzing O-glycosyl compounds            | 22  | 5.81E-05 |
| MF | GO:0005200 | structural constituent of cytoskeleton                         | 6   | 5.46E-03 |
| MF | GO:0003824 | catalytic activity                                             | 477 | 6.85E-03 |
| Up |            |                                                                |     |          |
| BP | GO:2001141 | regulation of RNA biosynthetic process                         | 56  | 2.62E-04 |
| BP | GO:1903506 | regulation of nucleic acid-templated transcription             | 56  | 2.62E-04 |
| BP | GO:0006355 | regulation of transcription DNA-templated                      | 56  | 2.62E-04 |
| BP | GO:2000112 | regulation of cellular macromolecule biosynthetic process      | 59  | 2.76E-04 |
| BP | GO:0055114 | obsolete oxidation-reduction process                           | 29  | 2.91E-04 |
| BP | GO:0010556 | regulation of macromolecule biosynthetic process               | 59  | 3.01E-04 |
| BP | GO:0051252 | regulation of RNA metabolic process                            | 56  | 4.40E-04 |
| BP | GO:0031326 | regulation of cellular biosynthetic process                    | 59  | 4.56E-04 |
| BP | GO:0009889 | regulation of biosynthetic process                             | 59  | 5.37E-04 |
| BP | GO:0031323 | regulation of cellular metabolic process                       | 65  | 8.57E-04 |
| BP | GO:0019219 | regulation of nucleobase-containing compound metabolic process | 56  | 8.58E-04 |
| BP | GO:0080090 | regulation of primary metabolic process                        | 63  | 1.01E-03 |
| BP | GO:0051171 | regulation of nitrogen compound metabolic process              | 62  | 1.25E-03 |
| BP | GO:0042742 | defense response to bacterium                                  | 10  | 3.23E-03 |
| BP | GO:0009617 | response to bacterium                                          | 10  | 3.23E-03 |
| BP | GO:0019222 | regulation of metabolic process                                | 68  | 4.01E-03 |
| BP | GO:0010468 | regulation of gene expression                                  | 60  | 4.55E-03 |
| BP | GO:0006351 | transcription DNA-templated                                    | 58  | 4.72E-03 |
| BP | GO:0050832 | defense response to fungus                                     | 9   | 5.74E-03 |
| BP | GO:0050789 | regulation of biological process                               | 93  | 5.77E-03 |
| BP | GO:0006952 | defense response                                               | 32  | 6.02E-03 |
| BP | GO:0097659 | nucleic acid-templated transcription                           | 58  | 6.04E-03 |

|    |            |                                               |     |          |
|----|------------|-----------------------------------------------|-----|----------|
| BP | GO:0032774 | RNA biosynthetic process                      | 58  | 6.48E-03 |
| BP | GO:0060255 | regulation of macromolecule metabolic process | 65  | 7.02E-03 |
| MF | GO:0140110 | transcription regulator activity              | 36  | 2.48E-04 |
| MF | GO:0016491 | oxidoreductase activity                       | 29  | 3.21E-04 |
| MF | GO:0003700 | DNA-binding transcription factor activity     | 31  | 2.80E-03 |
| MF | GO:0003824 | catalytic activity                            | 211 | 4.71E-03 |

---
