# Supplementary material for: Overexpression of Water-Responsive Genes Promoted by Elevated CO2 Reduces ROS and Enhances Drought Tolerance in Coffea Species
Source: MDPI journal article supplement (doi:10.3390/ijms24043210), 2023-02-06
Supplement: s1 [file s1]

**Table S9.** Regulation patterns of *Coffea canephora* cv. CL153 (CL153) Differentially Expressed Genes (DEGs) involved in the light reactions of photosynthesis, the Calvin cycle, and the photorespiration pathways. Homologs were identified through blastx and their involvement in the studied pathways was visualized through MapMan, according to the *A. thaliana* reference genome. Red represents up-regulated DEGs and blue represents down-regulated DEGs.

| Gene ID     | TAIR      | Protein Name                                                 | Log <sub>2</sub> FC |                   |                   |
|-------------|-----------|--------------------------------------------------------------|---------------------|-------------------|-------------------|
|             |           |                                                              | MWDa<br>vs<br>WWa   | SWDa<br>vs<br>WWa | SWDe<br>vs<br>WWe |
| Cc09_g01490 | at1g11860 | Aminomethyltransferase, mitochondrial                        | -2.79               | -3.36             | -3.26             |
| Cc10_g06080 | at4g09650 | ATP synthase delta chain, chloroplastic                      |                     | -1.97             | -2.26             |
| Cc09_g01650 | at4g04640 | ATP synthase gamma chain, chloroplastic                      |                     | -2.08             | -2.16             |
| Cc05_g09650 | at1g29930 | Chlorophyll a-b binding protein 1, chloroplastic             |                     | -4.50             | -5.42             |
| Cc05_g12720 | at5g54270 | Chlorophyll a-b binding protein 13, chloroplastic            |                     | -5.29             | -3.98             |
| Cc09_g09500 | at2g05100 | Chlorophyll a-b binding protein 36, chloroplastic            |                     | -3.32             | -3.29             |
| Cc09_g02010 | at3g54890 | Chlorophyll a-b binding protein 6A, chloroplastic            |                     | -4.01             |                   |
| Cc05_g09930 | at1g61520 | Chlorophyll a-b binding protein 8, chloroplastic             |                     | -2.90             | -2.30             |
| Cc10_g16210 | at4g10340 | Chlorophyll a-b binding protein CP26, chloroplastic          |                     | -4.16             |                   |
| Cc06_g01460 | at3g08940 | Chlorophyll a-b binding protein CP29.2, chloroplastic        |                     | -3.07             | -2.83             |
| Cc10_g04190 | at1g45474 | Chlorophyll a-b binding protein P4, chloroplastic            | -3.98               | -3.60             | -3.39             |
| Cc11_g16910 | at3g61470 | Chlorophyll a-b binding protein, chloroplastic               |                     | -3.01             | -2.59             |
| Cc06_g12480 | at1g19150 | Chlorophyll a-b binding protein, chloroplastic               |                     |                   | -1.55             |
| Cc04_g03070 | at1g79870 | D-isomer specific 2-hydroxyacid dehydrogenase family protein |                     | -2.79             | -3.62             |
| Cc07_g10820 | at1g20020 | Ferredoxin--NADP reductase, leaf-type isozyme, chloroplastic |                     | -2.13             | -2.23             |
| Cc02_g22810 | at1g10960 | Ferredoxin, chloroplastic                                    |                     |                   | -1.86             |
| Cc06_g01860 | at3g54050 | Fructose-1,6-bisphosphatase, chloroplastic                   |                     | -2.37             | -2.28             |
| Cc05_g15430 | at4g26530 | Fructose-bisphosphate aldolase, cytoplasmic isozyme 1        |                     |                   | -1.93             |
| Cc11_g00610 | at1g12900 | Glyceraldehyde-3-phosphate dehydrogenase A, chloroplastic    |                     | -2.50             | -2.17             |
| Cc10_g00410 | at1g42970 | Glyceraldehyde-3-phosphate dehydrogenase B, chloroplastic    |                     | -2.80             | -2.32             |

|             |           |                                                           |       |       |
|-------------|-----------|-----------------------------------------------------------|-------|-------|
| Cc09_g10170 | at1g68010 | Glycerate dehydrogenase                                   |       | -1.64 |
| Cc08_g02390 | at1g32470 | Glycine cleavage system H protein, mitochondrial          |       | -2.75 |
| Cc05_g15690 | at1g55670 | Hypothetical protein                                      | -3.85 |       |
| Cc04_g02830 | at3g16250 | NDH-dependent cyclic electron flow 1                      | -1.90 | -1.80 |
| Cc07_g05350 | at3g50820 | Oxygen-evolving enhancer protein 1, chloroplastic         | -2.08 | -2.03 |
| Cc05_g00840 | at1g06680 | Oxygen-evolving enhancer protein 2, chloroplastic         | -2.47 | -2.22 |
| Cc02_g11770 | at4g05180 | Oxygen-evolving enhancer protein 3-2, chloroplastic       | -4.20 | -3.19 |
| Cc05_g10170 | at3g14420 | Peroxisomal (S)-2-hydroxy-acid oxidase                    | -1.83 | -1.84 |
| Cc05_g16370 | at1g56190 | Phosphoglycerate kinase, cytosolic                        | -2.28 | -2.40 |
| Cc08_g03960 | at1g32060 | Phosphoribulokinase, chloroplastic                        | -2.16 | -1.85 |
| Cc03_g03590 | at1g03130 | Photosystem I reaction center subunit II, chloroplastic   | -2.71 | -2.37 |
| Cc09_g06610 | at1g31330 | Photosystem I reaction center subunit III, chloroplastic  | -3.50 | -3.05 |
| Cc01_g17500 | at2g20260 | Photosystem I reaction center subunit IV A, chloroplastic | -2.11 | -2.27 |
| Cc09_g08490 | at1g30380 | Photosystem I reaction center subunit psaK, chloroplastic | -5.09 | -3.83 |
| Cc04_g03050 | at3g16140 | Photosystem I reaction center subunit VI, chloroplastic   | -2.36 | -2.60 |
| Cc01_g15890 | at4g12800 | Photosystem I reaction center subunit XI, chloroplastic   | -2.70 | -2.55 |
| Cc01_g08780 | at1g08380 | photosystem I subunit O                                   | -4.74 |       |
| Cc05_g15930 | at1g79040 | Photosystem II 10 kDa polypeptide, chloroplastic          | -2.57 | -1.91 |
| Cc06_g23280 | at3g21055 | Photosystem II 5 kDa protein, chloroplastic               | -4.00 | -3.25 |
| Cc11_g16230 | at1g67740 | Photosystem II core complex proteins psbY, chloroplastic  | -2.85 | -2.64 |
| Cc01_g18800 | at2g30570 | Photosystem II reaction center W protein, chloroplastic   | -2.98 | -2.89 |
| Cc10_g01080 | at1g20340 | Plastocyanin, chloroplastic                               | -2.63 | -2.70 |
| Cc07_g19080 | at5g36120 | Predicted protein                                         |       | -1.83 |
| Cc02_g33910 | at2g28605 | Predicted protein (Fragment)                              |       | -2.67 |
| Cc07_g10450 | at4g38970 | Probable fructose-bisphosphate aldolase 2, chloroplastic  | -1.76 | -2.23 |
| Cc01_g03210 | at3g04790 | Probable ribose-5-phosphate isomerase                     |       | -1.52 |
| Cc02_g35130 | at4g15510 | PsbP domain-containing protein 1, chloroplastic           | -1.83 | -1.55 |
| Cc10_g00260 | at1g76450 | PsbP domain-containing protein 3, chloroplastic           |       | -1.61 |

|             |           |                                                                      |       |       |       |
|-------------|-----------|----------------------------------------------------------------------|-------|-------|-------|
| Cc08_g08290 | at5g11450 | PsbP domain-containing protein 5, chloroplastic                      |       |       | -2.60 |
| Cc11_g12760 | at1g14150 | PsbQ-like 2                                                          |       |       | -1.72 |
| Cc08_g01190 | at1g12550 | Putative Glyoxylate reductase                                        |       | -3.76 | -3.56 |
| Cc09_g07140 | at5g44520 | Putative Probable ribose-5-phosphate isomerase                       |       |       | -1.89 |
| Cc06_g02340 | at5g02120 | Putative uncharacterized protein                                     |       |       | -2.07 |
| Cc00_g15710 | at1g67090 | Ribulose biphosphate carboxylase small chain SSU11A, chloroplastic   | -2.23 | -2.77 | -2.95 |
| Cc02_g07500 | at2g39730 | Ribulose biphosphate carboxylase/oxygenase activase 1, chloroplastic |       | 2.70  | -2.10 |
| Cc02_g06960 | at3g55800 | Sedoheptulose-1,7-bisphosphatase, chloroplastic                      |       | -2.08 | -2.34 |
| Cc05_g06750 | at1g03600 | Thylakoid lumenal protein At1g03610, chloroplastic                   |       | -2.20 | -2.62 |
| Cc02_g39980 | at2g46820 | Thylakoid membrane phosphoprotein 14 kDa, chloroplastic              |       | -2.93 | -2.78 |
| Cc02_g11220 | at3g60750 | Transketolase, chloroplastic                                         | 4.89  | 5.28  |       |
| Cc02_g16530 | at2g21170 | Triosephosphate isomerase, chloroplastic                             |       | -1.57 | -2.50 |
