# Supplementary material for: Overexpression of Water-Responsive Genes Promoted by Elevated CO2 Reduces ROS and Enhances Drought Tolerance in Coffea Species
Source: MDPI journal article supplement (doi:10.3390/ijms24043210), 2023-02-06
Supplement: s1 [file s1]

**Table S11.** Significantly ( $g:SCS < 0.01$ ) enriched Gene Ontology (GO) terms of the three main categories – Biological Process (GO:BP), Molecular Function (GO:MF) and Cellular Component (GO:CC) – among up- and down-regulated Differentially Expressed Genes (DEGs) found in *Coffea arabica* cv. Icatu (Icatu) plants grown under moderate water deficit (MWD) or severe water deficit (SWD), in comparison with well-watered control plants, under ambient air 380  $\mu\text{L L}^{-1}$  [ $\text{CO}_2$ ] (aCO<sub>2</sub>) or elevated 700  $\mu\text{L L}^{-1}$  [ $\text{CO}_2$ ] (eCO<sub>2</sub>), at 25/20 °C (day/night). DEGs were ranked by increasing log2 fold-change (FC) and an Over-representation analysis (ORA) was performed using gProfiler, against *C. canephora* functional annotation. Counts indicate the total number of DEGs annotated with each GO term.

| [CO <sub>2</sub> ] | Water | Category | Term ID    | Description                                         | DEGs | FDR      |
|--------------------|-------|----------|------------|-----------------------------------------------------|------|----------|
| aCO <sub>2</sub>   | MWD   |          |            | Down                                                |      |          |
|                    |       | BP       | GO:0071555 | cell wall organization                              | 26   | 2.60E-17 |
|                    |       |          | GO:0005975 | carbohydrate metabolic process                      | 23   | 2.43E-08 |
|                    |       |          | GO:0045490 | pectin catabolic process                            | 6    | 1.28E-05 |
|                    |       |          | GO:0042744 | hydrogen peroxide catabolic process                 | 8    | 3.54E-05 |
|                    |       |          | GO:0016036 | cellular response to phosphate starvation           | 4    | 1.63E-04 |
|                    |       |          | GO:0009813 | flavonoid biosynthetic process                      | 3    | 1.73E-04 |
|                    |       |          | GO:0006878 | cellular copper ion homeostasis                     | 4    | 1.94E-04 |
|                    |       |          | GO:0006979 | response to oxidative stress                        | 8    | 1.77E-03 |
|                    |       | CC       | GO:0005618 | cell wall                                           | 21   | 1.12E-21 |
|                    |       |          | GO:0048046 | apoplast                                            | 15   | 5.87E-14 |
|                    |       |          | GO:0005576 | extracellular region                                | 25   | 5.96E-13 |
|                    |       |          | GO:0031225 | anchored component of membrane                      | 8    | 1.84E-05 |
|                    |       | MF       | GO:0004553 | hydrolase activity hydrolyzing O-glycosyl compounds | 16   | 8.86E-13 |
|                    |       |          | GO:0016762 | xyloglucosyl transferase activity                   | 7    | 2.87E-07 |

|            |             |                                                                      |    |          |
|------------|-------------|----------------------------------------------------------------------|----|----------|
|            | GO:0030145  | manganese ion binding                                                | 7  | 2.84E-06 |
|            | GO:0004190  | aspartic-type endopeptidase activity                                 | 11 | 3.64E-05 |
|            | GO:0016210  | naringenin-chalcone synthase activity                                | 3  | 7.23E-05 |
|            | GO:0004601  | peroxidase activity                                                  | 8  | 1.54E-04 |
|            | GO:0005375  | copper ion transmembrane transporter activity                        | 4  | 1.94E-04 |
|            | GO:0004857  | enzyme inhibitor activity                                            | 7  | 5.30E-04 |
|            | GO:0016788  | hydrolase activity acting on ester bonds                             | 6  | 6.71E-04 |
|            | GO:0030570  | pectate lyase activity                                               | 3  | 1.14E-03 |
| <b>Up</b>  |             |                                                                      |    |          |
| <b>BP</b>  | GO:0009737  | response to abscisic acid                                            | 2  | 1.05E-03 |
| <b>MF</b>  | GO:0000981  | DNA-binding transcription factor activity RNA polymerase II-specific | 3  | 8.79E-04 |
|            | GO:0004869  | cysteine-type endopeptidase inhibitor activity                       | 3  | 4.87E-03 |
| <b>SWD</b> | <b>Down</b> |                                                                      |    |          |
| <b>BP</b>  | GO:0015979  | photosynthesis                                                       | 33 | 1.13E-23 |
|            | GO:0071555  | cell wall organization                                               | 38 | 1.57E-16 |
|            | GO:0045490  | pectin catabolic process                                             | 8  | 1.97E-08 |
|            | GO:0009765  | photosynthesis light harvesting                                      | 11 | 2.22E-07 |
|            | GO:0005975  | carbohydrate metabolic process                                       | 41 | 2.15E-06 |
|            | GO:0015995  | chlorophyll biosynthetic process                                     | 9  | 2.92E-04 |
|            | GO:0018298  | protein-chromophore linkage                                          | 10 | 1.54E-03 |
|            | GO:0006633  | fatty acid biosynthetic process                                      | 14 | 9.58E-03 |
| <b>CC</b>  | GO:0005618  | cell wall                                                            | 18 | 9.03E-16 |

|           |            |                                                     |     |          |
|-----------|------------|-----------------------------------------------------|-----|----------|
|           | GO:0009523 | photosystem II                                      | 17  | 3.89E-13 |
|           | GO:0009522 | photosystem I                                       | 16  | 1.73E-12 |
|           | GO:0005576 | extracellular region                                | 30  | 1.22E-10 |
|           | GO:0048046 | apoplast                                            | 11  | 5.32E-07 |
|           | GO:0016021 | integral component of membrane                      | 351 | 6.38E-07 |
|           | GO:0009507 | chloroplast                                         | 20  | 9.65E-03 |
| <b>MF</b> | GO:0004857 | enzyme inhibitor activity                           | 16  | 7.15E-11 |
|           | GO:0016760 | cellulose synthase (UDP-forming) activity           | 13  | 7.82E-08 |
|           | GO:0016168 | chlorophyll binding                                 | 11  | 2.22E-07 |
|           | GO:0004553 | hydrolase activity hydrolyzing O-glycosyl compounds | 29  | 3.27E-07 |
|           | GO:0008171 | O-methyltransferase activity                        | 10  | 1.98E-06 |
|           | GO:0030599 | pectinesterase activity                             | 6   | 4.24E-06 |
|           | GO:0045330 | aspartyl esterase activity                          | 6   | 4.24E-06 |
|           | GO:0015267 | channel activity                                    | 11  | 3.65E-05 |
|           | GO:0030145 | manganese ion binding                               | 8   | 4.86E-05 |
|           | GO:0102337 | 3-oxo-cerotoyl-CoA synthase activity                | 9   | 1.54E-04 |
|           | GO:0102336 | 3-oxo-arachidoyl-CoA synthase activity              | 9   | 1.54E-04 |
|           | GO:0102756 | very-long-chain 3-ketoacyl-CoA synthase activity    | 9   | 1.54E-04 |
|           | GO:0102338 | 3-oxo-lignoceronyl-CoA synthase activity            | 9   | 1.54E-04 |
|           | GO:0004190 | aspartic-type endopeptidase activity                | 15  | 5.39E-04 |
|           | GO:0042132 | fructose 16-bisphosphate 1-phosphatase activity     | 4   | 6.98E-03 |
| <b>Up</b> |            |                                                     |     |          |

|                        |            |             |            |                                                     |     |          |
|------------------------|------------|-------------|------------|-----------------------------------------------------|-----|----------|
| <b>eCO<sub>2</sub></b> | <b>SWD</b> | <b>BP</b>   | GO:0019953 | sexual reproduction                                 | 3   | 8.77E-07 |
|                        |            |             | GO:0009627 | systemic acquired resistance                        | 3   | 1.80E-03 |
|                        |            | <b>MF</b>   | GO:0045735 | nutrient reservoir activity                         | 4   | 4.94E-04 |
|                        |            |             | GO:0005504 | fatty acid binding                                  | 2   | 9.32E-03 |
|                        |            | <b>Down</b> |            |                                                     |     |          |
|                        |            | <b>BP</b>   | GO:0015979 | photosynthesis                                      | 28  | 1.57E-13 |
|                        |            |             | GO:0005975 | carbohydrate metabolic process                      | 68  | 5.56E-11 |
|                        |            |             | GO:0071555 | cell wall organization                              | 35  | 3.43E-10 |
|                        |            |             | GO:0006817 | phosphate ion transport                             | 48  | 1.56E-07 |
|                        |            |             | GO:0006633 | fatty acid biosynthetic process                     | 23  | 9.24E-07 |
|                        |            |             | GO:0015995 | chlorophyll biosynthetic process                    | 12  | 1.60E-05 |
|                        |            |             | GO:0009765 | photosynthesis light harvesting                     | 10  | 3.11E-05 |
|                        |            |             | GO:2000123 | positive regulation of stomatal complex development | 2   | 1.42E-04 |
|                        |            |             | GO:0045490 | pectin catabolic process                            | 9   | 5.29E-04 |
|                        |            |             | GO:0042744 | hydrogen peroxide catabolic process                 | 7   | 1.72E-03 |
|                        |            |             | GO:0018298 | protein-chromophore linkage                         | 12  | 1.27E-02 |
|                        |            |             | GO:0006979 | response to oxidative stress                        | 7   | 2.87E-02 |
|                        |            |             | GO:0000226 | microtubule cytoskeleton organization               | 4   | 3.21E-02 |
|                        |            |             | GO:0007017 | microtubule-based process                           | 9   | 4.07E-02 |
|                        |            | <b>CC</b>   | GO:0016021 | integral component of membrane                      | 606 | 1.51E-21 |
|                        |            |             | GO:0005618 | cell wall                                           | 18  | 1.07E-12 |

|           |            |                                                                            |    |          |
|-----------|------------|----------------------------------------------------------------------------|----|----------|
|           | GO:0005576 | extracellular region                                                       | 45 | 4.80E-12 |
|           | GO:0005886 | plasma membrane                                                            | 86 | 6.54E-11 |
|           | GO:0009522 | photosystem I                                                              | 15 | 3.70E-08 |
|           | GO:0009523 | photosystem II                                                             | 13 | 1.50E-05 |
|           | GO:0005874 | microtubule                                                                | 24 | 1.78E-04 |
|           | GO:0048046 | apoplast                                                                   | 10 | 1.94E-04 |
|           | GO:0031225 | anchored component of membrane                                             | 13 | 3.65E-04 |
|           | GO:0019898 | extrinsic component of membrane                                            | 9  | 4.78E-04 |
| <b>MF</b> | GO:0004553 | hydrolase activity hydrolyzing O-glycosyl compounds                        | 33 | 6.62E-12 |
|           | GO:0022857 | transmembrane transporter activity                                         | 62 | 4.54E-10 |
|           | GO:0004672 | protein kinase activity                                                    | 88 | 9.42E-08 |
|           | GO:0016747 | transferase activity transferring acyl groups other than amino-acyl groups | 15 | 1.84E-06 |
|           | GO:0008171 | O-methyltransferase activity                                               | 12 | 7.97E-06 |
|           | GO:0004857 | enzyme inhibitor activity                                                  | 14 | 3.04E-05 |
|           | GO:0016168 | chlorophyll binding                                                        | 10 | 3.11E-05 |
|           | GO:0005199 | structural constituent of cell wall                                        | 5  | 1.24E-04 |
|           | GO:0016787 | hydrolase activity                                                         | 26 | 4.71E-04 |
|           | GO:0016762 | xyloglucosyl transferase activity                                          | 8  | 8.49E-04 |
|           | GO:0004097 | catechol oxidase activity                                                  | 4  | 1.06E-03 |
|           | GO:0102345 | 3-hydroxy-lignoceroyl-CoA dehydratase activity                             | 4  | 2.78E-03 |
|           | GO:0102344 | 3-hydroxy-behenoyl-CoA dehydratase activity                                | 4  | 2.78E-03 |

|            |                                                                                                                                                                |    |          |
|------------|----------------------------------------------------------------------------------------------------------------------------------------------------------------|----|----------|
| GO:0102343 | 3-hydroxy-arachidoyl-CoA dehydratase activity                                                                                                                  | 4  | 2.78E-03 |
| GO:0102158 | very-long-chain 3-hydroxyacyl-CoA dehydratase activity                                                                                                         | 4  | 2.78E-03 |
| GO:0030145 | manganese ion binding                                                                                                                                          | 6  | 3.74E-03 |
| GO:0046983 | protein dimerization activity                                                                                                                                  | 24 | 4.80E-03 |
| GO:0005200 | structural constituent of cytoskeleton                                                                                                                         | 8  | 4.84E-03 |
| GO:0004601 | peroxidase activity                                                                                                                                            | 7  | 5.00E-03 |
| GO:0004190 | aspartic-type endopeptidase activity                                                                                                                           | 15 | 5.48E-03 |
| GO:0030570 | pectate lyase activity                                                                                                                                         | 2  | 1.64E-02 |
| GO:0016630 | protochlorophyllide reductase activity                                                                                                                         | 3  | 1.87E-02 |
| GO:0016717 | oxidoreductase activity acting on paired donors with oxidation of a pair of donors<br>resulting in the reduction of molecular oxygen to two molecules of water | 5  | 1.90E-02 |
| GO:0042132 | fructose 16-bisphosphate 1-phosphatase activity                                                                                                                | 4  | 2.52E-02 |
| GO:0016788 | hydrolase activity acting on ester bonds                                                                                                                       | 4  | 3.92E-02 |
| GO:0030599 | pectinesterase activity                                                                                                                                        | 6  | 4.98E-02 |
| GO:0045330 | aspartyl esterase activity                                                                                                                                     | 6  | 4.98E-02 |

---

**Up**

---

|           |            |                                  |   |          |
|-----------|------------|----------------------------------|---|----------|
| <b>BP</b> | GO:0019953 | sexual reproduction              | 3 | 3.05E-08 |
|           | GO:0009627 | systemic acquired resistance     | 3 | 1.74E-05 |
|           | GO:0009415 | response to water                | 3 | 7.78E-04 |
|           | GO:0000272 | polysaccharide catabolic process | 4 | 7.80E-03 |
|           | GO:0006562 | proline catabolic process        | 2 | 3.23E-02 |

---

|           |            |                                                                                               |    |          |
|-----------|------------|-----------------------------------------------------------------------------------------------|----|----------|
|           | GO:0005975 | carbohydrate metabolic process                                                                | 17 | 3.45E-02 |
| <b>CC</b> | GO:0005576 | extracellular region                                                                          | 3  | 2.92E-03 |
|           | GO:0016602 | CCAAT-binding factor complex                                                                  | 3  | 4.24E-02 |
| <b>MF</b> | GO:0004869 | cysteine-type endopeptidase inhibitor activity                                                | 5  | 4.80E-06 |
|           | GO:0010427 | abscisic acid binding                                                                         | 8  | 1.40E-05 |
|           | GO:0038023 | signaling receptor activity                                                                   | 8  | 1.40E-05 |
|           | GO:0016620 | oxidoreductase activity acting on the aldehyde or oxo group of donors NAD or NADP as acceptor | 7  | 1.73E-03 |
|           | GO:0008194 | UDP-glycosyltransferase activity                                                              | 17 | 3.35E-03 |
|           | GO:0016161 | beta-amylase activity                                                                         | 4  | 7.80E-03 |
|           | GO:0102229 | amylopectin maltohydrolase activity                                                           | 4  | 7.80E-03 |
|           | GO:0043565 | sequence-specific DNA binding                                                                 | 16 | 8.41E-03 |
|           | GO:0004476 | mannose-6-phosphate isomerase activity                                                        | 2  | 2.19E-02 |
|           | GO:0020037 | heme binding                                                                                  | 21 | 2.64E-02 |
|           | GO:0009055 | electron transfer activity                                                                    | 8  | 2.82E-02 |
|           | GO:0004657 | proline dehydrogenase activity                                                                | 2  | 3.23E-02 |
|           | GO:0003700 | DNA-binding transcription factor activity                                                     | 24 | 3.90E-02 |
