# Supplementary material for: Overexpression of Water-Responsive Genes Promoted by Elevated CO2 Reduces ROS and Enhances Drought Tolerance in Coffea Species
Source: MDPI journal article supplement (doi:10.3390/ijms24043210), 2023-02-06
Supplement: s1 [file s1]

**Table S1.** Primers used in this study for qRT-PCR. ASPG1: Aspartic Protease in Guard Cell 1; GMPM1: 18 kDa seed maturation; PP2C51: protein phosphatase 2C 51-like; LEADC3: late embryogenesis abundant protein Dc3-like; DH1a: Dehydrin DH1a; ATHB22: homeobox leucine zipper; SUS2: sucrose synthase 2-like; PIP2: aquaporin PIP2-2-like; XTH6: xyloglucan endotransglucosylase/hydrolase protein 6; GOLS2: galactinol synthase 2-like; CuSOD1: Superoxide dismutase [Cu-Zn]; APX<sub>chl</sub>: Chloroplast ascorbate peroxidase.

| Primer Name                | Sequence (5'–3')          |
|----------------------------|---------------------------|
| <i>ASPG1-F</i>             | TTTCCTGCAGGTTGTGGATGTTAG  |
| <i>ASPG1-R</i>             | TCCCCCGGGTATTTCCGGCGAAG   |
| <i>GMPM1-F</i>             | CTGGAACCGCCACGTATTCTCC    |
| <i>GMPM1-R</i>             | TTAAGTACCCCCAGTCCCATAC    |
| <i>PP2C51-F</i>            | CCGAGTACGGAAGCTGCAAGAAGT  |
| <i>PP2C51-R</i>            | GCAGCGATAGTGGCAGGGAAACAA  |
| <i>LEADC3_F</i>            | CTACGGCTACTGTCAACGATGTGAA |
| <i>LEADC3_R</i>            | ATGGGTAAAGAATGGCTGTATCCCT |
| <i>DH1a-F</i>              | CGGTCACAAGGAGGCTCAA       |
| <i>DH1a-R</i>              | GTATCCAGGAGCTGCAGTAGCA    |
| <i>ATHB22-F</i>            | AGTTGGAGCGAAGATAAGTTC     |
| <i>ATHB22-R</i>            | TCACCGGAAGGCATAAATCTAC    |
| <i>SUS2-F</i>              | ACTCTGCGGCAATG TAAACT     |
| <i>SUS2-R</i>              | AGACTGCCGCGGAGACCAGA      |
| <i>PIP2-F</i>              | ATGTCACATACGGCGGAG        |
| <i>PIP2-R</i>              | TTGGGATCAGTGGCAGAG        |
| <i>XTH6-F</i>              | CGGTCACCGCTTCTTTTCAGTT    |
| <i>XTH6-R</i>              | CAAGAACTCAAAATCTAGCTCGT   |
| <i>GOLS2-F</i>             | ATGGGATCGATGGAAATGAACTT   |
| <i>GOL2-R</i>              | ACTTCCTGCCAAGAATGTCAC     |
| <i>CuSOD1-F</i>            | CCCTTGAGACACAACGAAT       |
| <i>CuSOD1-R</i>            | GGCAGTACCATCTTGACCA       |
| <i>APX<sub>chl</sub>-F</i> | CACCTGCTGCTCATTTACG       |
| <i>APX<sub>chl</sub>-R</i> | GACCTTCCCAATGTGTGTG       |
