# Supplementary material for: Overexpression of Water-Responsive Genes Promoted by Elevated CO2 Reduces ROS and Enhances Drought Tolerance in Coffea Species
Source: MDPI journal article supplement (doi:10.3390/ijms24043210), 2023-02-06
Supplement: s1 [file s1]

**Table S8.** Regulation pattern among *Arabidopsis thaliana* homologs of the differentially expressed genes (DEGs) of *Coffea arabica* cv. Icatu (Icatu), related to the light reactions of photosynthesis, the Calvin cycle, and the photorespiration pathways. Homologs were identified through blastx and their involvement in the studied pathways was visualized through MapMan, according to the *A. thaliana* reference genome.

| Gene ID      | TAIR      | Protein Name                                                     | Log2FC |       |       |
|--------------|-----------|------------------------------------------------------------------|--------|-------|-------|
|              |           |                                                                  | MWDa   | SWDa  | SWDe  |
|              |           |                                                                  | vs     | vs    | vs    |
|              |           |                                                                  | WWa    | WWa   | WWe   |
| LOC113709680 | at1g11860 | aminomethyltransferase, mitochondrial                            |        |       | -1.63 |
| LOC113709724 | at4g04640 | ATP synthase gamma chain, chloroplastic-like                     |        | -2.58 | -1.75 |
| LOC113688109 | at5g54270 | chlorophyll a-b binding protein 13, chloroplastic                |        | -3.62 | -2.82 |
| LOC113743471 | at2g05100 | chlorophyll a-b binding protein 36, chloroplastic                |        | -2.43 | -2.10 |
| LOC113742137 | at3g47470 | chlorophyll a-b binding protein 4, chloroplastic-like isoform X2 |        | -2.90 | -3.50 |
| LOC113731692 | at1g45474 | chlorophyll a-b binding protein CP24 10A, chloroplastic-like     |        | -2.79 | -2.16 |
| LOC113712883 | at4g10340 | chlorophyll a-b binding protein CP26, chloroplastic              |        | -3.29 | -3.26 |
| LOC113710161 | at1g29930 | chlorophyll a-b binding protein of LHCII type 1-like             |        | -4.11 | -3.18 |
| LOC113716585 | at3g61470 | chlorophyll a-b binding protein, chloroplastic-like              |        | -1.91 | -1.53 |
| LOC113693755 | at3g54050 | fructose-1,6-bisphosphatase, chloroplastic-like                  |        | -3.16 | -1.58 |
| LOC113731210 | at4g38970 | fructose-bisphosphate aldolase 1, chloroplastic-like             |        | -1.89 |       |
| LOC113743786 | at4g26530 | fructose-bisphosphate aldolase 5, cytosolic isoform X2           |        | -2.72 |       |
| LOC113719543 | at1g12900 | glyceraldehyde-3-phosphate dehydrogenase A, chloroplastic-like   |        | -2.43 | -1.38 |
| LOC113712439 | at1g42970 | glyceraldehyde-3-phosphate dehydrogenase B, chloroplastic        |        | -2.19 |       |

|              |           |                                                                   |      |       |       |
|--------------|-----------|-------------------------------------------------------------------|------|-------|-------|
| LOC113703085 | at1g32470 | glycine cleavage system H protein, mitochondrial-like             |      |       | -1.69 |
| LOC113723858 | at2g45290 | Low Quality protein: transketolase, chloroplastic-like            | 6.19 | 7.84  | 7.19  |
| LOC113702187 | at3g50820 | oxygen-evolving enhancer protein 1, chloroplastic                 |      | -1.92 | -1.41 |
| LOC113689091 | at1g06680 | oxygen-evolving enhancer protein 2, chloroplastic-like            |      | -2.18 | -1.66 |
| LOC113730850 | at4g05180 | oxygen-evolving enhancer protein 3-2, chloroplastic-like          |      | -4.52 | -3.80 |
| LOC113690443 | at1g56190 | phosphoglycerate kinase, chloroplastic-like                       |      | -2.89 | -1.80 |
| LOC113716676 | at1g14150 | photosynthetic NDH subunit of lumenal location 2, chloroplastic   |      | -2.35 | -1.49 |
| LOC113709767 | at1g31330 | photosystem I reaction center subunit III, chloroplastic-like     |      | -2.47 | -2.15 |
| LOC113710419 | at1g30380 | photosystem I reaction center subunit psaK, chloroplastic         |      | -2.47 |       |
| LOC113741817 | at3g16140 | photosystem I reaction center subunit VI, chloroplastic-like      |      | -2.51 | -1.94 |
| LOC113732043 | at4g12800 | photosystem I reaction center subunit XI, chloroplastic-like      |      | -2.12 |       |
| LOC113705554 | at1g08380 | photosystem I subunit O-like                                      |      | -2.72 | -2.82 |
| LOC113743532 | at1g79040 | photosystem II 10 kDa polypeptide, chloroplastic-like             |      | -1.93 | -1.52 |
| LOC113697312 | at3g21055 | photosystem II 5 kDa protein, chloroplastic-like                  |      | -2.74 |       |
| LOC113697312 | at3g21055 | photosystem II 5 kDa protein, chloroplastic-like                  |      |       | -2.15 |
| LOC113716969 | at1g67740 | photosystem II core complex proteins psbY, chloroplastic-like     |      | -1.89 |       |
| LOC113715630 | at2g30570 | photosystem II reaction center W protein, chloroplastic           |      | -2.18 | -1.69 |
| LOC113689677 | at1g03600 | photosystem II repair protein PSB27-H1, chloroplastic-like        |      |       | -1.51 |
| LOC113692840 | at1g20340 | plastocyanin-like                                                 |      | -2.09 |       |
| LOC113698884 | at3g04790 | probable ribose-5-phosphate isomerase 3, chloroplastic            |      | -1.88 |       |
| LOC113707851 | at5g44520 | probable ribose-5-phosphate isomerase 4, chloroplastic isoform X1 |      | -2.59 |       |
| LOC113728229 | at2g46820 | protein Curvature Thylakoid 1B, chloroplastic                     |      | -3.49 | -2.28 |

|              |           |                                                                         |       |           |
|--------------|-----------|-------------------------------------------------------------------------|-------|-----------|
| LOC113732998 | at4g15510 | psbP domain-containing protein 1, chloroplastic-like                    | -1.97 | -1.55     |
| LOC113712265 | at1g76450 | psbP domain-containing protein 3, chloroplastic isoform X2              |       | -1.45     |
| LOC113703724 | at5g11450 | psbP domain-containing protein 5, chloroplastic isoform X2              |       | -1.84     |
| LOC113739930 | at3g55330 | psbP-like protein 1, chloroplastic isoform X2                           | -2.33 |           |
| LOC113698165 | at1g67090 | ribulose biphosphate carboxylase small chain SSU8, chloroplastic-like   | -2.29 |           |
| LOC113732386 | at2g39730 | ribulose biphosphate carboxylase/oxygenase activase, chloroplastic-like | 3.80  | 3.94 3.77 |
| LOC113742776 | at5g61410 | ribulose-phosphate 3-epimerase, chloroplastic                           |       | -1.38     |
| LOC113695105 | at1g60950 | uncharacterized protein LOC113695105                                    | -3.96 | -5.91     |
| LOC113698106 | at5g36120 | uncharacterized protein LOC113698106                                    |       | -1.61     |
