# Supplementary material for: Overexpression of Water-Responsive Genes Promoted by Elevated CO2 Reduces ROS and Enhances Drought Tolerance in Coffea Species
Source: Int J Mol Sci. 2023 Feb 6;24(4):3210. doi: 10.3390/ijms24043210 (PMC9966387; doi:10.3390/ijms24043210)
Supplement: Supplementary file 1 [file ijms-24-03210-s001.zip]

Archive with 13 entries (13 files):
- ijms-2086788-supplementary.pdf
- Table_S1.pdf
- Table_S10.xlsx
- Table_S11.pdf
- Table_S12.pdf
- Table_S2.pdf
- Table_S3.pdf
- Table_S4.xlsx
- Table_S5.xlsx
- Table_S6.xlsx
- Table_S7.xlsx
- Table_S8.pdf
- Table_S9.pdf
