# Supplementary material for: Overexpression of Water-Responsive Genes Promoted by Elevated CO2 Reduces ROS and Enhances Drought Tolerance in Coffea Species
Source: Int J Mol Sci. 2023 Feb 6;24(4):3210. doi: 10.3390/ijms24043210 (PMC9966387; doi:10.3390/ijms24043210)
Supplement: Supplementary file 1 [file ijms-24-03210-s001.zip › Table_S4.xlsx]

## Sheet: MWD_vs_WW_aCO2_down
Gene ID	Log2FC	Protein Name
LOC113687565	-8.95373407643593	putative cell wall protein
LOC113695211	-7.02871924783255	probable beta-1,4-xylosyltransferase IRX9
LOC113734419	-6.59098856618808	chalcone synthase 2-like
LOC113734410	-6.5830489514145	probable pectate lyase 8
LOC113726680	-6.44633636528751	beta-xylosidase/alpha-L-arabinofuranosidase 2-like
LOC113711967	-5.66346316695563	extensin-3-like
LOC113731533	-5.37637643267102	LIM domain-containing protein WLIM1-like isoform X2
LOC113710311	-5.23400787885722	LOW QUALITY PROTEIN: protein EXORDIUM-like 5
LOC113711987	-5.08836243423357	peamaclein-like
LOC113711940	-4.96893253592385	uncharacterized protein LOC113711940
LOC113738600	-4.9482101299034	purple acid phosphatase 17-like
LOC113707392	-4.92022087141263	uncharacterized protein LOC113707392
LOC113742797	-4.82641285124257	copper transporter 1-like
LOC113691596	-4.74259585643798	uncharacterized protein LOC113691596
LOC113705156	-4.6636031233745	Unknown protein
LOC113726131	-4.54261460573809	GDSL esterase/lipase At1g28590-like
LOC113736367	-4.52441636438701	cysteine proteinase inhibitor 5-like
LOC113736223	-4.51301176159501	basic proline-rich protein-like
LOC113730171	-4.35464839286868	21 kDa protein-like
LOC113704221	-4.3291934396608	leucoanthocyanidin dioxygenase-like
LOC113703561	-4.29681796104445	probable WRKY transcription factor 40
LOC113732195	-4.27947474568809	O-fucosyltransferase 20-like
LOC113733949	-4.18426030522502	uncharacterized protein LOC113733949
LOC113733498	-4.16701656041988	Unknown protein
LOC113701398	-4.14335686031042	BTB/POZ and TAZ domain-containing protein 4-like
LOC113716947	-4.11469078846966	acidic endochitinase-like
LOC113716360	-4.09904370824175	acidic endochitinase-like
LOC113741493	-4.0504861049066	purple acid phosphatase 17-like
LOC113701453	-4.04844622487745	cinnamoyl-CoA reductase-like SNL6
LOC113718604	-4.03386438148447	NRR repressor homolog 1-like
LOC113693721	-4.00226196228208	leucine-rich repeat extensin-like protein 4
LOC113702307	-3.89698972823721	endochitinase-like
LOC113715005	-3.77736290373982	uncharacterized protein LOC113715005
LOC113713714	-3.77004110274314	probable galacturonosyltransferase-like 1
LOC113719150	-3.7363364040281	acidic endochitinase-like
LOC113699296	-3.72533444372296	Unknown protein
LOC113732152	-3.72066002563845	uncharacterized protein LOC113732152
LOC113703568	-3.67505248486203	protein P21-like
LOC113694795	-3.66234485924053	cinnamoyl-CoA reductase-like SNL6 isoform X2
LOC113699341	-3.63037905169014	basic endochitinase-like
LOC113726198	-3.58711470307509	transcription factor MYB80-like isoform X2
LOC113729299	-3.55946462519712	zinc transporter 1-like
LOC113730528	-3.52313677718986	ammonium transporter 1 member 3-like
LOC113716991	-3.51990090990748	acidic endochitinase-like
LOC113710343	-3.50323433036915	apyrase-like
LOC113714427	-3.49090109177067	uncharacterized protein LOC113714427
LOC113693855	-3.48758552359882	UDP-glucuronate 4-epimerase 1-like
LOC113694912	-3.48372794011019	S-adenosylmethionine synthase 3
LOC113704253	-3.47107506899265	zinc transporter 4, chloroplastic-like
LOC113697863	-3.46195647119419	peroxidase 51-like
LOC113694998	-3.46000313930895	glucan endo-1,3-beta-glucosidase, acidic-like
LOC113738303	-3.45861358610838	Unknown protein
LOC113696040	-3.3943392901612	aquaporin PIP2-2-like
LOC113717034	-3.36406236221025	leucoanthocyanidin reductase-like isoform X2
LOC113719567	-3.33846252673615	Unknown protein
LOC113714234	-3.31260565012213	extensin-like
LOC113726819	-3.28826775575713	SPX domain-containing protein 3-like
LOC113704235	-3.27386641120564	uncharacterized protein LOC113704235
LOC113688915	-3.20854160674289	early nodulin-like protein 2 isoform X2
LOC113710849	-3.19939242647274	probable isoaspartyl peptidase/L-asparaginase 2
LOC113729555	-3.19134474261248	copper transporter 1-like
LOC113710354	-3.16675614558628	copper transporter 1-like
LOC113694151	-3.14639203652466	stress-response A/B barrel domain-containing protein UP3-like
LOC113700184	-3.12988481459419	tubulin alpha chain
LOC113717912	-3.09365244250625	polygalacturonase-1 non-catalytic subunit beta-like
LOC113705432	-3.04619084344732	UDP-glycosyltransferase 92A1-like
LOC113740274	-3.02174286779747	protein CDI-like
LOC113713457	-2.99758737408148	protein EXORDIUM-like
LOC113725602	-2.99089981017559	c-Myc-binding protein homolog
LOC113702180	-2.97706404649291	non-specific lipid-transfer protein 2-like
LOC113700426	-2.95330827117577	L-ascorbate oxidase-like
LOC113734145	-2.93453648274289	histone H2AX-like
LOC113736377	-2.93374461728871	adenosylhomocysteinase
LOC113699442	-2.93121547498726	uncharacterized protein LOC113699442
LOC113738601	-2.89286717291475	flavonoid 3'-monooxygenase-like
LOC113733576	-2.87316054104372	Unknown protein
LOC113743676	-2.86957620043354	probable tyrosine-protein phosphatase DSP4 isoform X3
LOC113697429	-2.86720521125557	peroxidase 25-like
LOC113691281	-2.85947609755092	uncharacterized protein LOC113691281
LOC113692757	-2.84496309996939	probable 1-deoxy-D-xylulose-5-phosphate synthase 2, chloroplastic
LOC113725277	-2.83937936712194	probable chalcone--flavonone isomerase 3
LOC113702480	-2.79345939995361	glutamate decarboxylase-like
LOC113726990	-2.78412740633205	protein PHLOEM PROTEIN 2-LIKE A1-like
LOC113730896	-2.76299830928684	LOW QUALITY PROTEIN: sugar carrier protein C-like
LOC113716818	-2.7375918960124	AP2/ERF and B3 domain-containing transcription factor RAV1-like
LOC113701168	-2.73719855230875	probable serine/threonine-protein kinase PBL7 isoform X2
LOC113717777	-2.7164402387581	glutathione S-transferase-like
LOC113694926	-2.7040401859715	S-adenosylmethionine synthase 3-like
LOC113708766	-2.70112517990931	isopentenyl-diphosphate Delta-isomerase I
LOC113709314	-2.66871813673825	isopentenyl-diphosphate Delta-isomerase I-like
LOC113729835	-2.65922807130522	protein RESPONSE TO LOW SULFUR 3-like
LOC113693944	-2.59891965940751	uncharacterized acetyltransferase At3g50280-like
LOC113723806	-2.59596725489815	cytosolic sulfotransferase 5-like
LOC113697314	-2.58105567207822	SPX domain-containing protein 1-like
LOC113701947	-2.54701742491743	MADS-box protein SVP-like isoform X2
LOC113741789	-2.53918346825467	ethylene-responsive transcription factor TINY-like
LOC113732466	-2.53272912150782	benzyl alcohol O-benzoyltransferase-like
LOC113696353	-2.49642805347997	uncharacterized protein LOC113696353
LOC113734508	-2.4813020225152	adenosylhomocysteinase-like
LOC113695467	-2.46905260601251	putative E3 ubiquitin-protein ligase XBAT31
LOC113689881	-2.4660504431183	probable tyrosine-protein phosphatase DSP4 isoform X3
LOC113731763	-2.45691990910265	SPX domain-containing protein 3-like
LOC113736553	-2.44638690771199	Unknown protein
LOC113714443	-2.44336635594686	phospho-2-dehydro-3-deoxyheptonate aldolase 1, chloroplastic-like
LOC113695974	-2.4200681694686	protein DETOXIFICATION 24-like
LOC113717919	-2.3998374936827	putative receptor like protein 25 isoform X3
LOC113694121	-2.34951998820615	SPX domain-containing protein 1-like
LOC113728472	-2.31470212389988	protein PHLOEM PROTEIN 2-LIKE A1-like
LOC113719463	-2.30047705410868	uncharacterized protein LOC113719463 isoform X1
LOC113709316	-2.29497213785455	transmembrane protein 56-like
LOC113688571	-2.23328768168878	cytochrome b561 and DOMON domain-containing protein At5g47530-like
LOC113709005	-2.21663830335361	acyl-CoA--sterol O-acyltransferase 1-like
LOC113733288	-2.1629893018238	probable WRKY transcription factor 53
LOC113701949	-2.13450492597604	F-box protein At5g67140-like
LOC113690043	-2.1198588343189	Unknown protein
LOC113725023	-2.09930475271519	tubulin beta-1 chain
LOC113699136	-2.08685444567596	glycine-rich domain-containing protein 1-like
LOC113697476	-2.08546329819898	aspartic proteinase-like protein 2
LOC113741401	-2.08472871073361	subtilisin-like protease SBT1.5
LOC113713677	-2.08160291272421	dihydrofolate reductase isoform X2
LOC113731368	-2.08044835778293	protein DMR6-LIKE OXYGENASE 2-like
LOC113739785	-2.07416167051852	probable arabinose 5-phosphate isomerase
LOC113700110	-2.0670389781255	pyridoxal kinase-like isoform X2
LOC113713681	-2.05333080792672	RPM1-interacting protein 4
LOC113688460	-2.04912433803312	beta-glucuronosyltransferase GlcAT14B-like
LOC113738042	-2.01586345137102	ATP-citrate synthase beta chain protein 2
LOC113734215	-2.01519094900296	auxin-induced protein 22D-like
LOC113718954	-2.01356315989901	receptor-like protein EIX2 isoform X2
LOC113731447	-2.01288862129289	CBS domain-containing protein CBSX2, chloroplastic-like isoform X2
LOC113728180	-2.00031470206509	probable WRKY transcription factor 53
LOC113705656	-1.99718972149141	zinc transporter 4, chloroplastic-like
LOC113730447	-1.99396837867963	probable methyltransferase PMT11 isoform X2
LOC113718072	-1.99307307529998	UDP-glucuronic acid decarboxylase 2-like
LOC113712254	-1.91757919839177	trans-cinnamate 4-monooxygenase-like
LOC113710735	-1.9164373789255	berberine bridge enzyme-like 21 isoform X2
LOC113730287	-1.90465368942125	wound-induced protein 1-like
LOC113734507	-1.89464092846833	serine hydroxymethyltransferase 4-like
LOC113727811	-1.85670846988727	LOW QUALITY PROTEIN: beta-galactosidase 8-like

## Sheet: MWD_vs_WW_aCO2_up
Gene ID	Log2FC	Protein Name
LOC113718871	5.76884408138622	small heat shock protein, chloroplastic-like
LOC113705069	4.28946774497932	Unknown protein
LOC113728149	3.57753791816994	BAG family molecular chaperone regulator 6-like
LOC113742953	3.07091084624771	Unknown protein
LOC113733485	3.05465910106661	uncharacterized protein LOC113733485
LOC113743330	2.77721183843557	F-box/LRR-repeat MAX2 homolog A-like
LOC113736864	2.73144381825686	uncharacterized protein LOC113736864
LOC113727180	2.69803488619012	L-type lectin-domain containing receptor kinase IV.1-like
LOC113712645	2.55721352482003	cysteine proteinase inhibitor 4-like
LOC113739401	2.52974579768237	cytochrome P450 78A5-like
LOC113734544	2.36009655521717	crocetin glucosyltransferase, chloroplastic-like
LOC113706747	2.29862829878232	probable E3 ubiquitin-protein ligase RZFP34
LOC113731545	2.26676071374952	probable zinc metallopeptidase EGY3, chloroplastic
LOC113736895	2.05110815881945	crocetin glucosyltransferase, chloroplastic

## Sheet: MWD_vs_WW_eCO2_down
Gene ID	Log2FC	Protein Name
LOC113737982	-8.65827131756989	Unknown protein
LOC113702896	-3.49281073979445	histidine-containing phosphotransfer protein 4-like
LOC113716835	-2.74267600483438	kirola-like
LOC113704253	-2.68719546787748	zinc transporter 4, chloroplastic-like

## Sheet: MWD_vs_WW_eCO2_up
Gene ID	Log2FC	Protein Name
LOC113694658	5.33746386861439	Unknown protein
LOC113716786	5.05722634255269	basic 7S globulin-like
LOC113717336	4.92940196510365	extracellular ribonuclease LE-like
LOC113728532	4.40212838384668	BTB/POZ domain-containing protein At3g22104-like
LOC113690546	3.96082731286226	glucan endo-1,3-beta-glucosidase 13-like
LOC113736992	3.69712493132181	probable leucine-rich repeat receptor-like protein kinase At5g49770
CoarCr008	3.60377571688007	Unknown protein
CoarCr007	3.56472709323033	Unknown protein
LOC113709194	3.54345571908878	Unknown protein
LOC113695176	3.50077669649517	laccase-4-like
LOC113690518	3.36984185779434	GDSL esterase/lipase At5g55050-like
LOC113689748	3.23364694671695	uncharacterized protein LOC113689748
LOC113709196	3.22553631109432	Unknown protein
LOC113726131	3.0825384000149	GDSL esterase/lipase At1g28590-like
CoarCr002	2.94278722313171	Unknown protein
CoarCr001	2.93588821287819	Unknown protein
LOC113731180	2.92945340490907	snakin-2
LOC113726629	2.60236196540351	protein EXORDIUM-like 2
LOC113731525	2.50890972049108	LOW QUALITY PROTEIN: probable beta-D-xylosidase 5
LOC113715230	2.1173248806091	metallothionein-like protein 1

## Sheet: SWD_vs_WW_aCO2_down
Gene ID	Log2FC	Protein Name
LOC113708131	-12.425296922768	fasciclin-like arabinogalactan protein 12
LOC113735907	-10.6559245121425	polygalacturonase 1 beta-like protein 3
LOC113732393	-10.5631513996179	uncharacterized protein LOC113732393 isoform X2
LOC113734704	-9.92354540096048	probably inactive leucine-rich repeat receptor-like protein kinase At3g28040
LOC113705045	-9.64500155006312	Unknown protein
LOC113731496	-9.57315662352557	classical arabinogalactan protein 9-like
LOC113725144	-9.21215725417185	21 kDa protein-like
LOC113730170	-9.17278300807019	21 kDa protein-like
LOC113693129	-9.00587733200027	uncharacterized protein LOC113693129
LOC113711027	-8.64969793144806	cytokinin dehydrogenase 5-like
LOC113739656	-8.64198759174557	aspartyl protease family protein At5g10770-like
LOC113726845	-8.5551061782026	stress-response A/B barrel domain-containing protein At5g22580-like
LOC113731050	-8.48353185681756	protein CHUP1, chloroplastic
LOC113734227	-8.40725209179593	protein WVD2-like 3 isoform X2
LOC113692724	-8.40568348817913	protein STRICTOSIDINE SYNTHASE-LIKE 2-like
LOC113732279	-8.28772005872241	uncharacterized protein LOC113732279
LOC113700447	-8.28687948852776	Unknown protein
LOC113712032	-8.28442948331112	MDIS1-interacting receptor like kinase 2-like
LOC113737753	-8.13198154106014	uncharacterized protein LOC113737753
LOC113701751	-7.92668133120787	alkane hydroxylase MAH1-like
LOC113733487	-7.91548062840909	uncharacterized protein LOC113733487
LOC113687946	-7.90795031919222	probable LRR receptor-like serine/threonine-protein kinase At1g07650 isoform X2
LOC113734516	-7.90795031919222	Unknown protein
LOC113729130	-7.76667495187944	pectinesterase 1-like
LOC113737059	-7.76233873913826	Unknown protein
LOC113739398	-7.71456627397538	ethylene-responsive transcription factor WIN1-like
LOC113715671	-7.70386513453438	uncharacterized protein LOC113715671
LOC113716336	-7.6382480258466	purple acid phosphatase 8-like isoform X2
LOC113715108	-7.62316130588357	uncharacterized protein LOC113715108
LOC113727104	-7.58620967234205	uncharacterized protein LOC113727104
LOC113703538	-7.5850377413785	putative UPF0481 protein At3g02645
LOC113725143	-7.57295708080673	21 kDa protein-like
LOC113714314	-7.57109583606546	germin-like protein subfamily 1 member 7
LOC113709818	-7.39020727306556	putative E3 ubiquitin-protein ligase LIN
LOC113734639	-7.29501341893847	cytochrome b561 and DOMON domain-containing protein At3g25290-like
LOC113734691	-7.28215802594558	cellulose synthase-like protein G3 isoform X2
LOC113733049	-7.24312890783851	protein NRT1/ PTR FAMILY 4.5-like isoform X1
LOC113703285	-7.20053830189109	ent-kaurenoic acid oxidase 2-like
LOC113704497	-7.19748235224059	uncharacterized protein LOC113704497 isoform X2
LOC113734588	-7.13208329475034	transcription factor bHLH77-like
LOC113701762	-6.93134476760372	STS14 protein
LOC113732904	-6.9311722718897	putative pectinesterase/pectinesterase inhibitor 22
LOC113726203	-6.88669289136565	transcription repressor OFP8-like
LOC113701649	-6.84356030659228	3-ketoacyl-CoA synthase 6
LOC113708911	-6.76482788944833	cationic amino acid transporter 5-like
LOC113687806	-6.73034422721011	calcium-binding protein PBP1-like
LOC113687907	-6.70885977376053	trans-resveratrol di-O-methyltransferase-like
LOC113703822	-6.69260046777102	carboxylesterase 1-like
LOC113739462	-6.66652458062225	cytochrome P450 71A1-like
LOC113706646	-6.58329419466462	Unknown protein
LOC113727734	-6.57439836255663	putative pectinesterase/pectinesterase inhibitor 22
LOC113730198	-6.55113944651327	leucine-rich repeat receptor-like protein kinase TDR
LOC113704387	-6.5477610762601	long-chain-alcohol oxidase FAO4A-like
LOC113711903	-6.48560817343388	beta-D-glucosyl crocetin beta-1,6-glucosyltransferase-like
LOC113704825	-6.44961782860091	uncharacterized protein LOC113704825
LOC113714835	-6.41609913607046	galacturonokinase-like isoform X2
LOC113707102	-6.37471985978393	LRR receptor-like serine/threonine-protein kinase GSO1
LOC113719715	-6.36814229574301	UDP-glycosyltransferase 83A1-like
LOC113734633	-6.34174200314372	transcription factor bHLH77-like
LOC113716426	-6.33881539540495	3-ketoacyl-CoA synthase 6-like
LOC113731706	-6.33751319220968	beta-xylosidase/alpha-L-arabinofuranosidase 2-like
LOC113706128	-6.33352288874399	putative UPF0481 protein At3g02645
LOC113715623	-6.28151071047477	piriformospora indica-insensitive protein 2-like
LOC113727231	-6.20828418113612	S-norcoclaurine synthase 2-like
LOC113696099	-6.19317274124232	patatin-like protein 3
LOC113730545	-6.19166404164867	vacuolar cation/proton exchanger 3-like isoform X2
LOC113724948	-6.18666542590842	UDP-glycosyltransferase 88B1-like
LOC113730274	-6.17212753458882	uncharacterized protein LOC113730274
LOC113708720	-6.15547221393053	Unknown protein
LOC113703267	-6.12876819302173	probable LRR receptor-like serine/threonine-protein kinase At3g47570
LOC113700039	-6.04736038654229	thaumatin-like protein 1
LOC113698334	-6.04151981208325	BTB/POZ domain-containing protein DOT3-like isoform X2
LOC113688288	-6.01253920817889	fasciclin-like arabinogalactan protein 13
LOC113709399	-5.99557564844307	heavy metal-associated isoprenylated plant protein 7-like
LOC113716566	-5.94066464418528	probable transmembrane ascorbate ferrireductase 3
LOC113725456	-5.91434457339279	expansin-A6-like
LOC113719716	-5.88111101825797	Unknown protein
LOC113712775	-5.87313718074942	Unknown protein
LOC113716577	-5.85690490543092	thaumatin-like protein isoform X1
LOC113703052	-5.8466264259588	protein HOTHEAD-like
LOC113728841	-5.83089221577951	uncharacterized protein LOC113728841
LOC113705072	-5.8233592067993	anthranilate N-benzoyltransferase protein 2-like
LOC113715184	-5.80864553162448	Unknown protein
LOC113707986	-5.77488463009827	berberine bridge enzyme-like 8
LOC113703798	-5.7720487620318	cinnamoyl-CoA reductase-like SNL6
LOC113730730	-5.75100842735303	bark storage protein A-like
LOC113713352	-5.73609332579673	extensin-like
LOC113703154	-5.72854995783459	BURP domain protein RD22-like
LOC113715395	-5.69016375404242	heavy metal-associated isoprenylated plant protein 37-like
LOC113687906	-5.65683276095217	trans-resveratrol di-O-methyltransferase-like
LOC113703627	-5.64843492748717	organic cation/carnitine transporter 3-like
LOC113715127	-5.62984021478736	FT-interacting protein 7-like
LOC113703153	-5.62404639141381	BURP domain-containing protein 3-like
LOC113703810	-5.60623093467197	vinorine synthase-like
LOC113732193	-5.58976751827366	beta-glucosidase 12-like isoform X2
LOC113714542	-5.58843687898182	fasciclin-like arabinogalactan protein 2
LOC113737726	-5.58712783193446	UDP-glycosyltransferase 13-like
LOC113688126	-5.57926231374951	acetylserotonin O-methyltransferase-like
LOC113702739	-5.55542437824688	mavicyanin-like
LOC113712774	-5.5533625800766	cytochrome P450 CYP82D47-like isoform X3
LOC113701004	-5.54082839430364	cyclin-D3-1-like
LOC113727919	-5.52631535325017	MLO-like protein 3 isoform X2
LOC113727565	-5.50750051932953	sugar transporter ERD6-like 5 isoform X4
LOC113701405	-5.49314781813999	probable galacturonosyltransferase-like 1
LOC113703358	-5.47662588542246	Unknown protein
LOC113702910	-5.46602377699512	protein NRT1/ PTR FAMILY 1.2-like isoform X1
LOC113702205	-5.45976494924345	nucleobase-ascorbate transporter 11-like
LOC113736617	-5.45418196311746	calmodulin-like protein 3
LOC113707187	-5.45287594807721	aquaporin TIP4-1-like
LOC113742085	-5.42521495002869	(-)-germacrene D synthase-like
LOC113713568	-5.39694562979694	LOW QUALITY PROTEIN: cytokinin dehydrogenase 5-like
LOC113691131	-5.39338066129094	TBC1 domain family member 5 homolog A-like
LOC113743544	-5.37942078010859	G-type lectin S-receptor-like serine/threonine-protein kinase At4g03230
LOC113694588	-5.36253764571894	probable inactive leucine-rich repeat receptor-like protein kinase At3g03770
LOC113743512	-5.36108721988276	receptor-like protein kinase HSL1
LOC113734828	-5.3604215203775	CYC02 protein-like
LOC113728218	-5.30843429946678	NAC domain-containing protein 43 isoform X1
LOC113735485	-5.30006717630122	uncharacterized protein LOC113735485
LOC113731084	-5.28876074835713	uncharacterized protein LOC113731084
LOC113705455	-5.28096778778589	transcription repressor OFP8-like
LOC113698376	-5.27999836938368	protein KINESIN LIGHT CHAIN-RELATED 2-like
LOC113739897	-5.27264019363183	protein SIEVE ELEMENT OCCLUSION B-like
LOC113701029	-5.27232659356348	thaumatin-like protein 1
LOC113714492	-5.2669558129359	protein NRT1/ PTR FAMILY 5.10-like isoform X3
LOC113730272	-5.25884715196414	WEB family protein At2g38370-like isoform X1
LOC113739892	-5.25838998347302	uncharacterized protein LOC113739892 isoform X2
LOC113691740	-5.25825023542519	isoflavone reductase homolog PCBER-like
LOC113714790	-5.24973612449076	immune-associated nucleotide-binding protein 9-like
LOC113737108	-5.24661061055766	uncharacterized protein LOC113737108
LOC113692296	-5.24178648647015	Unknown protein
LOC113707654	-5.23604338920263	protein PYRICULARIA ORYZAE RESISTANCE 21-like isoform X1
LOC113739695	-5.22133584584348	probable inactive receptor kinase At1g48480
LOC113704837	-5.21902251584946	probable LRR receptor-like serine/threonine-protein kinase At3g47570
LOC113712292	-5.21433875430372	probable receptor-like serine/threonine-protein kinase At5g57670
LOC113689829	-5.2107649740725	receptor-like protein kinase HSL1
LOC113705303	-5.2100422963218	uncharacterized protein LOC113705303
LOC113713428	-5.2100422963218	receptor-like protein 7
LOC113732826	-5.18905071565431	hyoscyamine 6-dioxygenase-like
LOC113712181	-5.15790571167433	tubulin alpha-4 chain-like
LOC113718784	-5.1225285325572	MLP-like protein 423
LOC113731698	-5.11230444421017	uncharacterized protein LOC113731698
LOC113698417	-5.0665470169629	auxin-responsive protein IAA9-like
LOC113742520	-5.04858364080578	serine carboxypeptidase-like 45
LOC113701164	-5.03444036601171	proteasome subunit beta type-5-B-like
LOC113708573	-5.0306475760002	delta(24)-sterol reductase-like
LOC113741256	-5.03052150704112	beta-galactosidase
LOC113714232	-5.02799103376643	extensin-like
LOC113708240	-5.02695537801983	MLO-like protein 3 isoform X2
LOC113703047	-5.02460384428701	glucan endo-1,3-beta-glucosidase-like
LOC113726578	-5.0201918080459	gamma-glutamyl peptidase 5-like
LOC113690091	-5.01855209204607	glucose-6-phosphate/phosphate translocator 2, chloroplastic-like
LOC113704251	-5.00887457816118	protein ABIL2-like isoform X5
LOC113742031	-5.00458475638208	uncharacterized protein LOC113742031
LOC113714787	-4.99007574016646	immune-associated nucleotide-binding protein 9-like isoform X1
LOC113693745	-4.97791365578204	isoflavone reductase homolog PCBER-like
LOC113724593	-4.97569894160409	subtilisin-like protease SBT1.4
LOC113693913	-4.9307247460287	secoisolariciresinol dehydrogenase-like
LOC113727481	-4.9115614835275	Unknown protein
LOC113725299	-4.91032787686464	WEB family protein At2g38370-like isoform X3
LOC113695267	-4.90383261967223	probable glycerol-3-phosphate dehydrogenase [NAD(+)
LOC113706660	-4.88884856805584	putative receptor-like protein kinase At3g47110
LOC113738674	-4.88441308455448	Unknown protein
LOC113742131	-4.88285110041677	uncharacterized protein LOC113742131 isoform X2
LOC113736897	-4.87997073869642	trans-resveratrol di-O-methyltransferase-like
LOC113703892	-4.86853363686544	cellulose synthase-like protein D3
LOC113715636	-4.8538174173402	WAT1-related protein At3g28050-like
LOC113702398	-4.84196642018507	probable pectinesterase/pectinesterase inhibitor 51
LOC113731911	-4.84150147743537	uncharacterized protein LOC113731911
LOC113695827	-4.8275128847847	pathogenesis-related protein PR-1-like
LOC113731745	-4.82423153980715	transcription factor UNE10-like
LOC113717371	-4.81985197946209	probable protein S-acyltransferase 22
LOC113710852	-4.81457872743732	receptor kinase-like protein Xa21
LOC113737773	-4.79848092414392	MDIS1-interacting receptor like kinase 2-like isoform X2
LOC113739748	-4.78674132844714	probable metal-nicotianamine transporter YSL7
LOC113712715	-4.78077101547786	protein ECERIFERUM 2-like
LOC113727048	-4.77514715048835	beta-glucosidase 24-like
LOC113698005	-4.76742970583717	cyclin-D3-1-like
LOC113725675	-4.75798630916091	hippocampus abundant transcript-like protein 1
LOC113717392	-4.7561453766708	classical arabinogalactan protein 26-like
LOC113703015	-4.74960527374715	ABC transporter C family member 10-like
LOC113708423	-4.74782727829399	disease resistance protein RPP8-like
LOC113701267	-4.73822460481755	citrate-binding protein-like
LOC113735074	-4.73232881778155	trans-resveratrol di-O-methyltransferase-like
LOC113732764	-4.72977013669058	receptor-like cytosolic serine/threonine-protein kinase RBK2 isoform X1
LOC113716874	-4.7223736637615	LOW QUALITY PROTEIN: protein NRT1/ PTR FAMILY 6.1-like
LOC113733341	-4.71645928659184	uncharacterized protein LOC113733341
LOC113742589	-4.70871224449341	GDSL esterase/lipase APG-like
LOC113724011	-4.70428298383081	uncharacterized protein At4g06744-like
LOC113718708	-4.70415566702021	acyl carrier protein 1, chloroplastic-like isoform X2
LOC113730133	-4.70084277172655	alpha-L-fucosidase 1-like
LOC113703556	-4.70030344312449	aspartyl protease family protein At5g10770-like
LOC113690370	-4.69385418755185	protein IQ-DOMAIN 1-like isoform X1
LOC113702960	-4.68704203530476	ethylene-responsive transcription factor WIN1-like
LOC113703818	-4.67586560703702	probable carboxylesterase 120
LOC113717936	-4.66959530895458	UDP-glycosyltransferase 83A1-like
LOC113692740	-4.66756108722639	uncharacterized protein LOC113692740
LOC113704351	-4.65585227716771	myosin-9-like isoform X2
LOC113710403	-4.6495573683688	uncharacterized protein LOC113710403
LOC113703429	-4.64524847473271	phosphoglycerate mutase-like protein AT74H
LOC113713204	-4.64431949276614	tubulin alpha-4 chain-like isoform X1
LOC113697214	-4.64248704132042	uncharacterized protein LOC113697214
LOC113736549	-4.6371154305591	probably inactive leucine-rich repeat receptor-like protein kinase At3g28040
LOC113717816	-4.6346897974148	probable galactinol--sucrose galactosyltransferase 2
LOC113699003	-4.60113401554522	sulfite exporter TauE/SafE family protein 3-like
LOC113702767	-4.59729695845426	type I inositol polyphosphate 5-phosphatase 2 isoform X3
LOC113734688	-4.59242118457384	MDIS1-interacting receptor like kinase 2-like isoform X1
LOC113688584	-4.58072362183178	septum-promoting GTP-binding protein 1-like
LOC113711010	-4.57060011539637	purine permease 3-like
LOC113706935	-4.57050364020773	BAG family molecular chaperone regulator 3-like
LOC113706681	-4.54915336363593	aspartyl protease family protein At5g10770-like
LOC113730464	-4.54284023173586	aspartic proteinase PCS1-like
LOC113741811	-4.53741749375402	protein MIZU-KUSSEI 1-like
LOC113719491	-4.53709570935156	disease resistance protein RPM1-like
LOC113735154	-4.52115440944192	UDP-glycosyltransferase 74E1-like
LOC113731758	-4.50577977813043	malate dehydrogenase, cytoplasmic-like
LOC113712441	-4.49517054712836	protein NPGR1-like
LOC113730850	-4.49042224928006	oxygen-evolving enhancer protein 3-2, chloroplastic-like
LOC113706530	-4.48692946164882	phosphoglycerate mutase-like protein AT74H
LOC113736975	-4.48248249164281	formin-like protein 1
LOC113703784	-4.47939689086026	BAG family molecular chaperone regulator 1-like
LOC113736305	-4.46904323401399	Unknown protein
LOC113706363	-4.4661075187082	BURP domain-containing protein 3-like
LOC113725864	-4.45799678027591	oxygen-evolving enhancer protein 3-2, chloroplastic-like
LOC113711078	-4.45360600035855	vacuolar cation/proton exchanger 3-like isoform X1
LOC113735073	-4.44974561806533	trans-resveratrol di-O-methyltransferase-like
LOC113729980	-4.43235379788453	probable membrane-associated kinase regulator 6
LOC113727442	-4.40916776561301	UDP-glycosyltransferase 83A1-like
LOC113710008	-4.40483268430855	delta(12)-acyl-lipid-desaturase-like
LOC113714521	-4.40193829089304	uncharacterized protein LOC113714521 isoform X2
LOC113735061	-4.38727222542601	uncharacterized protein LOC113735061
LOC113741812	-4.38584231739694	root phototropism protein 3-like
LOC113695018	-4.38217640446166	protein STRICTOSIDINE SYNTHASE-LIKE 2-like isoform X2
LOC113700194	-4.38182772212848	carbonic anhydrase 2-like
LOC113733895	-4.38042070837528	beta-D-xylosidase 1-like
LOC113741894	-4.37700942171114	cytochrome P450 734A1-like
LOC113734167	-4.37246250767565	VAN3-binding protein-like
LOC113709404	-4.3553758170767	probable LRR receptor-like serine/threonine-protein kinase At3g47570
LOC113734998	-4.35354784255091	Unknown protein
LOC113711383	-4.33434826508267	protein CHUP1, chloroplastic-like isoform X2
LOC113692063	-4.31400693140325	subtilisin-like protease SBT1.8
LOC113703305	-4.31308761895592	NAC domain-containing protein 71-like
LOC113706834	-4.31141374797214	cinnamoyl-CoA reductase-like SNL6
LOC113717969	-4.30620902248268	65-kDa microtubule-associated protein 6-like
LOC113690342	-4.30175652748387	acidic endochitinase-like
LOC113710336	-4.29797870232366	oligopeptide transporter 3-like
LOC113725699	-4.29780941783074	cytochrome P450 77A2-like
LOC113707401	-4.29006660116765	BURP domain protein RD22-like
LOC113742829	-4.28535933067095	peptidyl-prolyl cis-trans isomerase CYP26-2, chloroplastic isoform X1
LOC113715804	-4.2821600189565	wall-associated receptor kinase-like 20
LOC113690110	-4.28102792086067	putative late blight resistance protein homolog R1A-10 isoform X1
LOC113690559	-4.27949205135202	probable LRR receptor-like serine/threonine-protein kinase At1g07650 isoform X2
LOC113703392	-4.27318167544059	histidine-rich glycoprotein-like
LOC113707206	-4.26734128763382	rop guanine nucleotide exchange factor 14-like isoform X3
LOC113730250	-4.2664928841843	RING-H2 finger protein ATL74-like
LOC113718905	-4.25954544222942	long chain acyl-CoA synthetase 1-like
LOC113687863	-4.25861861707086	glutamate receptor 2.8-like
LOC113727528	-4.24139176065756	GDSL esterase/lipase 2-like
LOC113740459	-4.23687423786689	putative receptor-like protein kinase At1g80870
LOC113695070	-4.22900128181875	ethylene-responsive transcription factor TINY-like
LOC113735094	-4.22143234980372	uncharacterized protein LOC113735094
LOC113728190	-4.2152976811356	calcium-transporting ATPase, endoplasmic reticulum-type-like
LOC113701952	-4.214651587361	xyloglucan galactosyltransferase XLT2-like
LOC113712218	-4.21170389387916	LOW QUALITY PROTEIN: high mobility group B protein 9
LOC113726969	-4.21075721075453	uncharacterized protein LOC113726969
LOC113719695	-4.20842330605602	probable RNA-dependent RNA polymerase 1
LOC113690089	-4.20380275587579	tryptophan decarboxylase TDC2-like
LOC113732068	-4.20204687607867	protein ECERIFERUM 1-like
LOC113719507	-4.19734814575886	MLP-like protein 34
LOC113715690	-4.19656146528389	uncharacterized protein LOC113715690
LOC113703589	-4.18604490178561	putative UPF0481 protein At3g02645
LOC113703586	-4.1756887459418	GDSL esterase/lipase At4g10955-like
LOC113690920	-4.16192924745041	serine/threonine-protein kinase WAG1-like
LOC113704206	-4.15170290474753	monoacylglycerol lipase ABHD6
LOC113737732	-4.14821107894629	putative UPF0481 protein At3g02645
LOC113688348	-4.14278972912869	LRR receptor-like serine/threonine-protein kinase GSO2 isoform X1
LOC113712394	-4.13887989802856	ABC transporter B family member 13-like
LOC113699418	-4.13349561728793	subtilisin-like protease SBT3.9
LOC113687820	-4.12930995814908	uncharacterized protein LOC113687820
LOC113711763	-4.11695604421083	protein NRT1/ PTR FAMILY 5.10-like isoform X2
LOC113734835	-4.11572747777423	calmodulin-like protein 3
LOC113699090	-4.11272001987559	uncharacterized protein LOC113699090
LOC113703508	-4.10619804184293	putative invertase inhibitor
LOC113712338	-4.0947086820461	immune-associated nucleotide-binding protein 9-like
LOC113716416	-4.09274706623526	acidic endochitinase-like
LOC113698047	-4.09220502751992	probable pectinesterase/pectinesterase inhibitor 51
LOC113702926	-4.08595457085283	BURP domain protein RD22-like
LOC113708659	-4.08150352256076	chlorophyll a-b binding protein of LHCII type 1-like
LOC113695074	-4.08077676472732	ras-related protein RABE1a-like
LOC113727984	-4.07941285647793	SPX domain-containing membrane protein At4g22990-like isoform X1
LOC113725726	-4.07600529181226	bark storage protein A-like
LOC113688543	-4.07032734444851	phosphoenolpyruvate carboxylase-like
LOC113742108	-4.06937050358014	uncharacterized protein LOC113742108
LOC113731442	-4.06749596942062	filament-like plant protein 7
LOC113701428	-4.06489880774716	diacylglycerol O-acyltransferase 2-like
LOC113697158	-4.05944111558059	uncharacterized protein LOC113697158
LOC113742884	-4.04025918897725	Unknown protein
LOC113741202	-4.03866061120107	(-)-germacrene D synthase-like
LOC113733193	-4.0347356099868	probable aquaporin PIP1-2
LOC113716344	-4.02025920022401	65-kDa microtubule-associated protein 6-like
LOC113688080	-4.02012649594432	LRR receptor-like serine/threonine-protein kinase
LOC113702953	-4.01299316886636	ABC transporter B family member 10-like
LOC113725301	-4.0062264736172	uncharacterized protein LOC113725301
LOC113738116	-4.00621966470461	Unknown protein
LOC113736968	-4.0027870891673	kirola-like
LOC113735141	-4.00152751519374	formin-like protein 2
LOC113739745	-4.00017785607496	subtilisin-like protease SBT2.5
LOC113732028	-3.99896269337855	rac-like GTP-binding protein 5
LOC113726246	-3.99512637266037	GDSL esterase/lipase At1g29670-like
LOC113726262	-3.98963588170304	endo-1,4-beta-xylanase 5-like
LOC113693799	-3.98360087556625	auxin transporter-like protein 2
LOC113692324	-3.98067213236388	dynamin-related protein 4C-like
LOC113690427	-3.97968743986246	probable leucine-rich repeat receptor-like serine/threonine-protein kinase At3g14840
LOC113741587	-3.97388618613424	potassium channel SKOR-like isoform X3
LOC113691531	-3.95802048636777	probable serine incorporator isoform X2
LOC113723070	-3.95374798743368	uncharacterized protein LOC113723070
LOC113713479	-3.95132217030832	protein ECERIFERUM 2-like
LOC113710870	-3.94894747625317	transmembrane protein 136-like
LOC113736387	-3.93776852546781	purple acid phosphatase 23-like isoform X2
LOC113707336	-3.93229228956205	probable WRKY transcription factor 50
LOC113697976	-3.92447268178108	diacylglycerol O-acyltransferase 2-like
LOC113733189	-3.91485683152876	chlorophyllase-1-like
LOC113728478	-3.91304814994707	kinesin-like protein KIN-5D
LOC113703734	-3.91179680769571	glyoxylate/hydroxypyruvate reductase HPR3-like
LOC113726476	-3.89748822454841	uncharacterized protein LOC113726476
LOC113739738	-3.8923607743225	tropinone reductase homolog At5g06060-like
LOC113738371	-3.88373980541528	non-specific lipid-transfer protein 1-like
LOC113714330	-3.8741011676061	Unknown protein
LOC113706796	-3.85818787065135	protein HOTHEAD-like
LOC113716041	-3.85072493818191	chlorophyllase-1-like
LOC113710465	-3.84856424869706	theobromine synthase 2
LOC113727657	-3.84064832151888	heavy metal-associated isoprenylated plant protein 35-like
LOC113726784	-3.83648040701026	UDP-glucuronate 4-epimerase 3
LOC113729542	-3.83404348174229	short-chain dehydrogenase TIC 32, chloroplastic-like isoform X2
LOC113694146	-3.82966213069701	protein NLP7-like isoform X1
LOC113741287	-3.82546063854824	expansin-A10-like
LOC113719264	-3.81652231749502	cyclin-D1-1-like
LOC113739943	-3.80514675574443	peptidyl-prolyl cis-trans isomerase CYP26-2, chloroplastic-like isoform X3
LOC113712121	-3.80448707717284	wall-associated receptor kinase 2-like
LOC113716479	-3.79522910110183	nudix hydrolase 1-like
LOC113716986	-3.79400198763747	uncharacterized protein C594.04c-like
LOC113737112	-3.78987480219676	uncharacterized protein LOC113737112
LOC113706567	-3.78532665085787	putative invertase inhibitor
LOC113732991	-3.77887237283168	uncharacterized protein LOC113732991
LOC113737189	-3.77556241282862	UDP-glycosyltransferase 74E1-like
LOC113697187	-3.77476906810693	auxin transporter-like protein 2
LOC113730473	-3.76652729851811	expansin-A6-like
LOC113687744	-3.76618153673468	squamosa promoter-binding-like protein 3
LOC113712268	-3.76033755579496	LIM domain-containing protein WLIM1-like
LOC113690568	-3.75919483109849	polyphenol oxidase I, chloroplastic-like
LOC113696125	-3.75559720297727	heparanase-like protein 3
LOC113717824	-3.75223441934942	non-specific lipid-transfer protein 2-like
LOC113692737	-3.74682381348725	mechanosensitive ion channel protein 10-like
LOC113699255	-3.73904010245488	MADS-box protein SVP-like
LOC113711808	-3.7249396907617	auxin-responsive protein SAUR50-like
LOC113725407	-3.71971214024118	auxin transporter-like protein 2
LOC113739952	-3.7135850523058	GDSL esterase/lipase At3g48460
LOC113695559	-3.70703355772379	ABC transporter B family member 1
LOC113730682	-3.7001314740038	uncharacterized protein LOC113730682 isoform X2
LOC113697798	-3.69445391693913	probable receptor-like protein kinase At2g42960
LOC113692641	-3.69340130973575	rust resistance kinase Lr10-like
LOC113742080	-3.68301919364724	pathogenesis-related leaf protein 6-like
LOC113688094	-3.67119812046078	histone acetyltransferase KAT6A-like
LOC113718067	-3.67096642848157	pectinesterase inhibitor 6-like
LOC113707183	-3.65574563624848	BURP domain protein RD22-like
LOC113728141	-3.65238635490086	probable membrane-associated kinase regulator 6
LOC113716568	-3.64577025322613	Unknown protein
LOC113712816	-3.64082070429677	uncharacterized protein LOC113712816
LOC113697382	-3.63913170031321	putative cysteine-rich receptor-like protein kinase 16
LOC113706856	-3.63780393391516	alpha,alpha-trehalose-phosphate synthase [UDP-forming
LOC113715777	-3.63516517797371	cell number regulator 9-like isoform X2
LOC113732601	-3.63445794110888	probable inactive leucine-rich repeat receptor-like protein kinase At3g03770
LOC113707439	-3.62103872218305	LRR receptor-like serine/threonine-protein kinase ERECTA isoform X1
LOC113727558	-3.61668974857461	major antigen-like
LOC113725188	-3.61225902080888	hexose carrier protein HEX6-like isoform X2
LOC113714560	-3.60827262112892	protein WALLS ARE THIN 1-like
LOC113704904	-3.60246548782279	putative UPF0481 protein At3g02645
LOC113688109	-3.59889165324301	chlorophyll a-b binding protein 13, chloroplastic
LOC113697206	-3.59445164593598	putative GPI-anchored protein pfl2
LOC113707610	-3.58337240958987	jacalin-related lectin 5-like
LOC113719546	-3.56451754304683	probable RNA-dependent RNA polymerase 1
LOC113736648	-3.56232448993597	tetrapyrrole-binding protein, chloroplastic-like
LOC113704576	-3.55739662057396	probable carboxylesterase 15
LOC113708170	-3.55548225431495	putative E3 ubiquitin-protein ligase LIN
LOC113736242	-3.55382745898597	probable folate-biopterin transporter 9, chloroplastic isoform X2
LOC113716387	-3.54510095044051	uncharacterized protein LOC113716387 isoform X2
LOC113742535	-3.53796668857751	uncharacterized protein LOC113742535 isoform X2
LOC113699142	-3.53753615368926	uncharacterized protein LOC113699142 isoform X2
LOC113709566	-3.5370182099928	kinesin-like protein KIN-5D
LOC113742725	-3.53411621808484	uncharacterized protein At5g01610-like isoform X1
LOC113729795	-3.53120071424626	syntaxin-22-like isoform X1
LOC113709680	-3.52784053885918	aminomethyltransferase, mitochondrial
LOC113707072	-3.52436214184962	probable carboxylesterase 120
LOC113713844	-3.52205161257643	MDIS1-interacting receptor like kinase 2-like
LOC113700005	-3.51845188625519	metal transporter Nramp5-like isoform X2
LOC113702741	-3.50357434246926	uncharacterized protein LOC113702741 isoform X1
LOC113729588	-3.50334697735201	uncharacterized protein LOC113729588 isoform X2
LOC113710169	-3.49726033968454	LRR receptor-like serine/threonine-protein kinase FLS2 isoform X1
LOC113702194	-3.49403633375688	metal transporter Nramp5-like isoform X2
LOC113701820	-3.48549217669137	uncharacterized protein LOC113701820 isoform X2
LOC113713331	-3.48375535676962	F-box protein FBW2-like
LOC113728229	-3.46837876244462	protein CURVATURE THYLAKOID 1B, chloroplastic
LOC113732459	-3.46073715416225	S-norcoclaurine synthase 2-like
LOC113734000	-3.4601245339441	divinyl chlorophyllide a 8-vinyl-reductase, chloroplastic-like isoform X2
LOC113702665	-3.45446160227207	caffeic acid 3-O-methyltransferase-like
LOC113688081	-3.45086787703867	fasciclin-like arabinogalactan protein 2
LOC113727594	-3.44664432394122	heavy metal-associated isoprenylated plant protein 34-like
LOC113712922	-3.43395534094971	blue copper protein-like
LOC113734643	-3.4336016813435	uncharacterized protein LOC113734643
LOC113737071	-3.43041037583172	UDP-glycosyltransferase 92A1-like
LOC113739848	-3.42999177079134	uncharacterized protein LOC113739848
LOC113695025	-3.42754154537717	alpha carbonic anhydrase 1, chloroplastic-like isoform X2
LOC113711424	-3.42502053593394	BAG family molecular chaperone regulator 4-like
LOC113732451	-3.42309033590861	probable amidase At4g34880
LOC113702056	-3.42300979308458	squalene monooxygenase-like isoform X2
LOC113728187	-3.42267484983971	vegetative cell wall protein gp1-like
LOC113701909	-3.409307407493	ABC transporter G family member 15-like
LOC113707700	-3.40614532305264	transmembrane protein 56-like
LOC113695346	-3.40346347852874	1-aminocyclopropane-1-carboxylate oxidase homolog 1-like isoform X2
LOC113708716	-3.40296947043993	oligopeptide transporter 3-like
LOC113719452	-3.38249591662016	uncharacterized protein LOC113719452
LOC113700977	-3.37508393571255	protein trichome birefringence-like 19
LOC113710161	-3.36230440111428	chlorophyll a-b binding protein of LHCII type 1-like
LOC113738715	-3.35946123508729	auxin-induced protein 22A-like
LOC113726885	-3.3534020669054	putative phytosulfokines 6
LOC113734815	-3.34664908643863	Unknown protein
LOC113703872	-3.34509273289434	alpha,alpha-trehalose-phosphate synthase [UDP-forming
LOC113712654	-3.34460098297624	RING-H2 finger protein ATL54-like
LOC113708858	-3.33689324050724	uncharacterized protein LOC113708858
LOC113734920	-3.3297645277507	protein FANTASTIC FOUR 3-like
LOC113727112	-3.32866608933749	probable glycosyltransferase STELLO1
LOC113739446	-3.32495480523486	uncharacterized protein LOC113739446 isoform X2
LOC113693684	-3.32257081012798	alpha carbonic anhydrase 1, chloroplastic-like isoform X2
LOC113701265	-3.29800401514225	probable indole-3-acetic acid-amido synthetase GH3.1
LOC113742593	-3.2944799957463	protein ASPARTIC PROTEASE IN GUARD CELL 1-like isoform X2
LOC113734866	-3.29255286041997	tetrapyrrole-binding protein, chloroplastic-like
LOC113742401	-3.2915210869382	LOW QUALITY PROTEIN: uncharacterized protein C26H5.07c-like
LOC113706489	-3.29084857469476	transcription factor MYB4-like
LOC113697080	-3.28655798909292	galacturonokinase-like isoform X2
LOC113706849	-3.27634203730037	Unknown protein
LOC113702701	-3.26816202916245	viridiflorene synthase-like
LOC113712883	-3.2642107976534	chlorophyll a-b binding protein CP26, chloroplastic
LOC113733055	-3.26398351368835	germin-like protein 5-1
LOC113701693	-3.26290786733835	uncharacterized protein LOC113701693
LOC113718845	-3.26071659431585	alpha-xylosidase 1-like
LOC113712993	-3.26048816398658	uncharacterized protein LOC113712993
LOC113704898	-3.25591054289643	protein FAF-like, chloroplastic
LOC113742772	-3.24812664154602	subtilisin-like protease SBT2.5
LOC113727819	-3.2433765130918	uncharacterized protein LOC113727819
LOC113716736	-3.23377114636653	uncharacterized protein LOC113716736
LOC113740555	-3.23320386700457	uncharacterized protein LOC113740555
LOC113732377	-3.22698487610329	serine carboxypeptidase-like 40
LOC113716869	-3.21331604505777	LOW QUALITY PROTEIN: BTB/POZ domain-containing protein At1g67900-like
LOC113726731	-3.20871958573057	uncharacterized protein LOC113726731
LOC113710984	-3.20164144682062	photosystem I reaction center subunit N, chloroplastic-like
LOC113710866	-3.19758526004535	receptor protein kinase CLAVATA1-like
LOC113692025	-3.1906076836116	protein STRICTOSIDINE SYNTHASE-LIKE 10-like
LOC113707428	-3.18981495674647	probable glycosyltransferase At5g03795
LOC113740599	-3.18251691333706	transcription factor bHLH137 isoform X2
LOC113714532	-3.17970132540298	blue copper protein-like
LOC113711850	-3.16695860848125	protein NRT1/ PTR FAMILY 2.11-like
LOC113714324	-3.16677525124047	tubulin beta-1 chain
LOC113691269	-3.16557405485369	G-type lectin S-receptor-like serine/threonine-protein kinase LECRK3
LOC113733368	-3.15775185558829	3-ketoacyl-CoA synthase 1-like
LOC113730520	-3.15540639551399	ACT domain-containing protein ACR9-like
LOC113702113	-3.15349129708517	serine/threonine-protein kinase SAPK1-like isoform X3
LOC113715531	-3.15025943450815	lysine histidine transporter-like 6
LOC113728846	-3.14796536730762	beta-glucosidase 13-like
LOC113739619	-3.14613095843015	root phototropism protein 3-like
LOC113740032	-3.14336314887458	uncharacterized protein At4g14100-like
LOC113697169	-3.13785171833146	fructose-1,6-bisphosphatase, chloroplastic-like
LOC113705635	-3.13706543460984	patatin-like protein 1 isoform X1
LOC113696085	-3.13527747854623	magnesium-protoporphyrin IX monomethyl ester [oxidative
LOC113701327	-3.12785302221289	probable hexokinase-like 2 protein isoform X1
LOC113743235	-3.12646542780636	probable leucine-rich repeat receptor-like serine/threonine-protein kinase At3g14840
LOC113715202	-3.12453927957212	uncharacterized protein LOC113715202
LOC113725801	-3.11674223704079	phenylalanine ammonia-lyase
LOC113708913	-3.114011920455	lysM domain-containing GPI-anchored protein 2-like
LOC113713566	-3.11107441340093	uncharacterized protein LOC113713566
LOC113726193	-3.10695067267713	receptor-like protein 51 isoform X2
LOC113726304	-3.10390213564102	photosystem I subunit O-like
LOC113743663	-3.09540797711856	uncharacterized protein LOC113743663
LOC113695797	-3.08733083285113	expansin-A6-like
LOC113690090	-3.08616917135478	squamosa promoter-binding-like protein 3
LOC113716396	-3.07889784984058	LEAF RUST 10 DISEASE-RESISTANCE LOCUS RECEPTOR-LIKE PROTEIN KINASE-like 1.5
LOC113736193	-3.06702136074609	long-chain-alcohol oxidase FAO1-like
LOC113730380	-3.06680198120271	auxin transporter-like protein 1 isoform X3
LOC113687901	-3.06654659705674	glucan endo-1,3-beta-glucosidase 12
LOC113708425	-3.06609621585732	interactor of constitutive active ROPs 3-like isoform X2
LOC113724941	-3.06044744109013	probable membrane-associated kinase regulator 6
LOC113718781	-3.05588656625196	WAT1-related protein At3g28050-like isoform X2
LOC113738216	-3.05345929811575	glucose-1-phosphate adenylyltransferase large subunit 3, chloroplastic/amyloplastic-like
LOC113732309	-3.05208362364718	uncharacterized protein LOC113732309 isoform X2
LOC113726994	-3.04983804493634	uncharacterized protein LOC113726994 isoform X1
LOC113727571	-3.04914214062254	phenylalanine ammonia-lyase G4-like
LOC113724009	-3.04495299771715	filament-like plant protein 7
LOC113691905	-3.04182719998697	magnesium-chelatase subunit ChlH, chloroplastic
LOC113715468	-3.03607969820539	LEAF RUST 10 DISEASE-RESISTANCE LOCUS RECEPTOR-LIKE PROTEIN KINASE-like 2.1 isoform X2
LOC113714757	-3.0351425927381	photosystem I reaction center subunit N, chloroplastic-like
LOC113730100	-3.03420942630671	probable methyltransferase PMT15
LOC113708532	-3.02888219914493	caffeoylshikimate esterase-like
LOC113711134	-3.02581270474908	protein DCL homolog, chloroplastic-like
LOC113731035	-3.02087304897308	hexose carrier protein HEX6-like
LOC113694841	-3.01990364272641	magnesium-chelatase subunit ChlH, chloroplastic-like isoform X2
LOC113726602	-3.01761918137499	root phototropism protein 3-like isoform X2
LOC113715094	-3.01474649148375	uncharacterized protein LOC113715094 isoform X3
LOC113716953	-3.01351928122868	protein PLANT CADMIUM RESISTANCE 2-like
LOC113734036	-3.01292335259565	peptide methionine sulfoxide reductase B5-like
LOC113692285	-3.01273748530575	uncharacterized protein LOC113692285
LOC113741490	-3.00407068159526	zinc finger protein CONSTANS-LIKE 16-like
LOC113736281	-3.0025887348305	chalcone synthase 2-like
LOC113740003	-3.00248966481947	uncharacterized protein LOC113740003
LOC113732304	-2.99962535008233	Unknown protein
LOC113699980	-2.99409942747592	lamin-like protein
LOC113715773	-2.99061974306627	MLP-like protein 34
LOC113733194	-2.98456963491021	glycerol-3-phosphate 2-O-acyltransferase 4-like
LOC113732766	-2.98351560654204	oleoyl-acyl carrier protein thioesterase, chloroplastic-like
LOC113712120	-2.98209480378957	protein WALLS ARE THIN 1-like
LOC113695626	-2.98169961077859	transcription factor bHLH48-like
LOC113690815	-2.98103957738365	O-acyltransferase WSD1-like
LOC113702506	-2.97466635297776	GATA transcription factor 7-like
LOC113705508	-2.97312327922809	BURP domain protein RD22-like
LOC113709298	-2.95886174361095	uncharacterized protein ycf39-like
LOC113716989	-2.95765562048091	putative U-box domain-containing protein 42
LOC113739975	-2.95219666444652	magnesium protoporphyrin IX methyltransferase, chloroplastic-like
LOC113725500	-2.94483426118468	ACT domain-containing protein ACR9-like
LOC113736476	-2.94338257238006	major allergen Pru ar 1-like
LOC113725278	-2.94254580553601	RING-H2 finger protein ATL74-like
LOC113703868	-2.9416488189781	geraniol 8-hydroxylase-like
LOC113732773	-2.93877862633934	protein FANTASTIC FOUR 1
LOC113726116	-2.93252070455878	protein IQ-DOMAIN 1-like
LOC113727122	-2.9287652609371	tetraketide alpha-pyrone reductase 1-like
LOC113688042	-2.92474272072654	uncharacterized protein LOC113688042
LOC113731820	-2.92430377426403	uncharacterized protein LOC113731820 isoform X1
LOC113701283	-2.92107802487549	G-type lectin S-receptor-like serine/threonine-protein kinase LECRK1
LOC113712668	-2.91935944966611	filament-like plant protein 4
LOC113702242	-2.91921166360947	very-long-chain (3R)-3-hydroxyacyl-CoA dehydratase PASTICCINO 2-like
LOC113729987	-2.91149275780993	UDP-glycosyltransferase 88B1-like
LOC113738654	-2.9086895261756	uncharacterized protein LOC113738654
LOC113709445	-2.90722970057091	uncharacterized protein LOC113709445
LOC113698393	-2.90513540378474	aldehyde dehydrogenase family 3 member F1 isoform X3
LOC113739972	-2.90439151162111	ABC transporter G family member 11
LOC113696761	-2.90427715645257	magnesium-protoporphyrin IX monomethyl ester [oxidative
LOC113708898	-2.90339581498107	uncharacterized protein ycf39-like
LOC113689802	-2.90107129179798	uncharacterized protein LOC113689802 isoform X1
LOC113713445	-2.89801188844714	protein RADIALIS-like 3
LOC113710329	-2.89792981445447	aquaporin PIP2-4-like
LOC113713082	-2.89540264506164	Unknown protein
LOC113702309	-2.88716473506686	NAC domain-containing protein 22-like
LOC113734310	-2.87965254667984	long-chain-alcohol oxidase FAO1-like
LOC113700062	-2.87636681177141	serine/threonine-protein kinase SAPK1-like isoform X3
LOC113708606	-2.87543352536558	aminomethyltransferase, mitochondrial-like
LOC113688118	-2.86979625857243	phosphoglycerate kinase, chloroplastic
LOC113704173	-2.86861652371042	adenine phosphoribosyltransferase 4
LOC113742137	-2.86602500411915	chlorophyll a-b binding protein 4, chloroplastic-like isoform X2
LOC113740295	-2.86583878743767	chlorophyll a-b binding protein P4, chloroplastic-like isoform X2
LOC113719005	-2.86573061947508	uncharacterized protein LOC113719005 isoform X4
LOC113691849	-2.86470520870324	protein NLP1-like isoform X1
LOC113724924	-2.86383485591714	probable inactive receptor kinase At4g23740
LOC113708510	-2.85769891743152	7-methylxanthosine synthase 1
LOC113715112	-2.85291984739016	ATP sulfurylase 2-like
LOC113726522	-2.85037536033233	QWRF motif-containing protein 2-like isoform X2
LOC113702161	-2.84960366510165	non-specific phospholipase C2-like
LOC113708533	-2.84940762990684	pentatricopeptide repeat-containing protein At4g16390, chloroplastic
LOC113700432	-2.84711315410809	WUSCHEL-related homeobox 8-like isoform X2
LOC113700162	-2.84350204376107	cytochrome P450 85A1-like
LOC113708056	-2.84244362731587	uncharacterized protein LOC113708056 isoform X2
LOC113726667	-2.83724236631114	chlorophyll a-b binding protein CP24 10A, chloroplastic
LOC113710321	-2.83619331816298	uncharacterized protein LOC113710321
LOC113702178	-2.830074461994	methylesterase 7-like
LOC113694677	-2.82281174616905	probable serine incorporator isoform X2
LOC113739740	-2.81987554621047	tropinone reductase homolog At5g06060-like
LOC113719345	-2.81960793732402	intracellular ribonuclease LX-like
LOC113716742	-2.81826122820634	uncharacterized protein LOC113716742
LOC113732874	-2.81762962670104	transcription factor bHLH25-like
LOC113726544	-2.81629751288567	malate dehydrogenase, glyoxysomal-like isoform X1
LOC113701783	-2.81580657081735	phospholipase A1-Igamma3, chloroplastic-like
LOC113711046	-2.81555008198296	uncharacterized protein LOC113711046
LOC113725195	-2.81470512381221	derlin-1.2-like
LOC113713486	-2.80811412390086	uncharacterized protein LOC113713486
LOC113712888	-2.80754271871706	ATP sulfurylase 2-like
LOC113736914	-2.80726473167079	uncharacterized protein LOC113736914
LOC113742161	-2.80675543257253	LOW QUALITY PROTEIN: ABC transporter G family member 11-like
LOC113733022	-2.80436480518804	probable receptor-like protein kinase At2g42960 isoform X1
LOC113726384	-2.80416902529135	protein DMR6-LIKE OXYGENASE 2-like
LOC113687920	-2.80289709333351	acetylserotonin O-methyltransferase-like isoform X2
LOC113733860	-2.79734888913397	uncharacterized protein LOC113733860 isoform X2
LOC113695640	-2.79463358758999	flavonol synthase/flavanone 3-hydroxylase-like
LOC113701240	-2.78803279725194	ribulose bisphosphate carboxylase small chain SSU11A, chloroplastic-like isoform X2
LOC113694112	-2.78331339344154	photosystem II 5 kDa protein, chloroplastic-like
LOC113733285	-2.78312518939618	protein trichome birefringence-like 25 isoform X2
LOC113726126	-2.78098457192983	hexose carrier protein HEX6-like
LOC113735085	-2.77922332420059	uncharacterized protein LOC113735085
LOC113714136	-2.77534378249194	LOW QUALITY PROTEIN: putative kinase-like protein TMKL1
LOC113733936	-2.77472663246977	uncharacterized protein LOC113733936
LOC113699115	-2.77429064726117	magnesium-chelatase subunit ChlI, chloroplastic-like
LOC113711527	-2.77275770411579	non-functional pseudokinase ZED1-like
LOC113717578	-2.7697264481767	uncharacterized protein LOC113717578
LOC113731692	-2.7696352369998	chlorophyll a-b binding protein CP24 10A, chloroplastic-like
LOC113717117	-2.76022626489606	multicopper oxidase LPR2-like
LOC113691129	-2.75645479056941	protein RICE SALT SENSITIVE 3-like isoform X3
LOC113707227	-2.74724711303719	probable WRKY transcription factor 50
LOC113699081	-2.74598861489395	berberine bridge enzyme-like 22
LOC113731037	-2.74326523613124	GDSL esterase/lipase At1g28590-like isoform X2
LOC113735726	-2.74196255116405	protein trichome birefringence-like 6
LOC113738115	-2.74140941673432	probable protein phosphatase 2C 40
LOC113698563	-2.73323241215568	mannan endo-1,4-beta-mannosidase 7
LOC113697551	-2.73175270779161	WAT1-related protein At4g30420-like
LOC113713598	-2.73034934534883	uncharacterized protein LOC113713598
LOC113702347	-2.72986329797668	leucine-rich repeat receptor-like serine/threonine-protein kinase BAM1
LOC113705376	-2.72389969500531	uncharacterized protein LOC113705376 isoform X3
LOC113701116	-2.72336736947126	citrate-binding protein-like
LOC113710251	-2.72171310131828	flavonol sulfotransferase-like
LOC113706389	-2.72171187192408	probable carotenoid cleavage dioxygenase 4, chloroplastic
LOC113700747	-2.71727295638217	G-type lectin S-receptor-like serine/threonine-protein kinase RLK1
LOC113717201	-2.71528638300499	uncharacterized protein LOC113717201
LOC113697312	-2.71187745360295	photosystem II 5 kDa protein, chloroplastic-like
LOC113709403	-2.71137968701644	UPF0329 protein ECU05_1680/ECU11_0050-like
LOC113710985	-2.71034070410503	glutamyl-tRNA reductase 1, chloroplastic-like
LOC113687527	-2.70599564295469	G-type lectin S-receptor-like serine/threonine-protein kinase At4g03230
LOC113734473	-2.70282433855597	probable sucrose-phosphate synthase 2 isoform X1
LOC113695655	-2.70207477531951	protein BIC1-like
LOC113743786	-2.69626228701416	fructose-bisphosphate aldolase 5, cytosolic isoform X2
LOC113738092	-2.69514605849356	putative E3 ubiquitin-protein ligase LIN-1 isoform X2
LOC113708537	-2.69037234951765	subtilisin-like protease SBT5.6
LOC113705554	-2.68898357379673	photosystem I subunit O-like
LOC113690195	-2.68376347408532	septum-promoting GTP-binding protein 1-like
LOC113707855	-2.67927182206739	uncharacterized protein YKR070W-like isoform X2
LOC113717384	-2.67613878643157	probable xyloglucan endotransglucosylase/hydrolase protein 27
LOC113726042	-2.6736725700914	squamosa promoter-binding protein 1
LOC113695961	-2.67228237617588	short-chain dehydrogenase TIC 32, chloroplastic isoform X2
LOC113690714	-2.6613516785375	myb-like protein X
LOC113725115	-2.660494864765	uncharacterized protein LOC113725115
LOC113697523	-2.65420900116505	phosphoinositide phospholipase C 2-like isoform X1
LOC113726489	-2.65228268856626	alpha-L-fucosidase 2
LOC113695988	-2.65140071484242	putative elongation factor TypA-like SVR3, chloroplastic isoform X1
LOC113701300	-2.65051655582496	putative UDP-rhamnose:rhamnosyltransferase 1
LOC113734411	-2.64998226934961	purple acid phosphatase 23-like isoform X4
LOC113691852	-2.64438909206183	probable inactive leucine-rich repeat receptor-like protein kinase At3g03770
LOC113701761	-2.64429862119731	uncharacterized protein LOC113701761
LOC113740573	-2.64345670602306	inorganic pyrophosphatase 2-like
LOC113730407	-2.64337382072357	LIM domain-containing protein WLIM2b isoform X2
LOC113715085	-2.64114711952446	fructose-1,6-bisphosphatase, cytosolic
LOC113741333	-2.6378366604471	tropinone reductase homolog At2g29340-like
LOC113718842	-2.63749497908165	uncharacterized protein LOC113718842
LOC113708996	-2.63733097928951	uncharacterized protein LOC113708996
LOC113743281	-2.6333749320879	putative late blight resistance protein homolog R1A-10
LOC113702829	-2.63060716311726	NDR1/HIN1-like protein 6
LOC113694558	-2.6293463894305	reticulon-like protein B21 isoform X2
LOC113715606	-2.62568781014337	HIPL1 protein-like isoform X2
LOC113693755	-2.62144516895958	fructose-1,6-bisphosphatase, chloroplastic-like
LOC113707670	-2.61779630313344	transcription termination factor MTEF1, chloroplastic-like
LOC113728176	-2.61728067162633	protein trichome birefringence-like 25 isoform X2
LOC113739835	-2.6168182856933	cucumisin-like isoform X3
LOC113722143	-2.6148115902559	LOW QUALITY PROTEIN: ABC transporter G family member 15-like
LOC113734282	-2.61433970292268	probable inorganic phosphate transporter 1-3
LOC113698737	-2.61007493516794	phosphatidylinositol transfer protein 3-like
LOC113731624	-2.60949835633316	protein EXORDIUM-like 2
LOC113730683	-2.60493938635503	hippocampus abundant transcript-like protein 1
LOC113714677	-2.60470236668262	glutamyl-tRNA reductase 1, chloroplastic-like
LOC113698874	-2.59998052871023	WAT1-related protein At3g28050-like isoform X4
LOC113706734	-2.59433940656944	GDSL esterase/lipase At4g10955-like
LOC113729356	-2.59329236242443	LOW QUALITY PROTEIN: protein PLASTID TRANSCRIPTIONALLY ACTIVE 16, chloroplastic-like
LOC113714561	-2.58754065093702	squalene monooxygenase-like
LOC113729055	-2.58637745557084	fasciclin-like arabinogalactan protein 4
LOC113707858	-2.58271678239262	calreticulin-3-like
LOC113698367	-2.57876048763078	glutathione hydrolase 1-like
LOC113696987	-2.5781692473101	organic cation/carnitine transporter 7-like
LOC113732568	-2.57725034027617	chloroplast envelope quinone oxidoreductase homolog
LOC113734157	-2.57259253740676	homocysteine S-methyltransferase 2-like isoform X1
LOC113731232	-2.57179415741249	cysteine protease RD19A
LOC113743795	-2.57085887554148	salicylic acid-binding protein 2-like isoform X2
LOC113718757	-2.56916998635165	histidine kinase 4-like
LOC113738363	-2.56578506103149	expansin-A10-like
LOC113736608	-2.5619330592812	divinyl chlorophyllide a 8-vinyl-reductase, chloroplastic isoform X2
LOC113707851	-2.55817556100301	probable ribose-5-phosphate isomerase 4, chloroplastic isoform X1
LOC113711837	-2.55643607753381	uncharacterized protein LOC113711837
LOC113709724	-2.55621945507517	ATP synthase gamma chain, chloroplastic-like
LOC113690780	-2.54537246755914	pentatricopeptide repeat-containing protein At2g42920, chloroplastic
LOC113692474	-2.5359224176265	transcription factor bHLH48-like
LOC113706553	-2.53575617537722	probable LRR receptor-like serine/threonine-protein kinase At1g63430
LOC113690960	-2.52937402985558	subtilisin-like protease SBT5.3
LOC113719543	-2.52701545792612	glyceraldehyde-3-phosphate dehydrogenase A, chloroplastic-like
LOC113713370	-2.5266481922231	geranylgeranyl pyrophosphate synthase, chloroplastic-like
LOC113743517	-2.52353429814437	probable serine/threonine-protein kinase At1g54610
LOC113738359	-2.51824303710797	leucine-rich repeat receptor-like serine/threonine/tyrosine-protein kinase SOBIR1
LOC113716936	-2.5179976009415	IAA-amino acid hydrolase ILR1-like 2
LOC113719267	-2.51367614883102	LEAF RUST 10 DISEASE-RESISTANCE LOCUS RECEPTOR-LIKE PROTEIN KINASE-like 2.4 isoform X1
LOC113698105	-2.51220286745184	photosynthetic NDH subunit of lumenal location 4, chloroplastic-like isoform X1
LOC113711043	-2.51094956649434	geranylgeranyl pyrophosphate synthase, chloroplastic-like
LOC113703483	-2.51065528103352	O-glucosyltransferase rumi homolog isoform X2
LOC113730374	-2.50889362361003	uncharacterized protein LOC113730374
LOC113704304	-2.50850560599003	protein LOL1 isoform X2
LOC113698075	-2.50728021231482	uncharacterized protein LOC113698075
LOC113716754	-2.50256461484667	probable galactinol--sucrose galactosyltransferase 2
LOC113743471	-2.4942004506102	chlorophyll a-b binding protein 36, chloroplastic
LOC113732850	-2.49235666095203	psbP domain-containing protein 7, chloroplastic-like isoform X2
LOC113711005	-2.48929948527467	probable pectin methyltransferase QUA2
LOC113726478	-2.48501952605162	cinnamyl alcohol dehydrogenase 1-like
LOC113699382	-2.4844690455478	protein IQ-DOMAIN 31-like
LOC113741817	-2.48352813759826	photosystem I reaction center subunit VI, chloroplastic-like
LOC113727915	-2.48215973331201	endoglucanase 25-like
LOC113728215	-2.47976103752107	3-ketoacyl-CoA synthase 1
LOC113725809	-2.47967300146319	auxin response factor 18
LOC113690443	-2.4779100471535	phosphoglycerate kinase, chloroplastic-like
LOC113703814	-2.47742375014829	probable carboxylesterase 120
LOC113707216	-2.47600750781247	uncharacterized protein LOC113707216
LOC113688035	-2.47436185393138	uncharacterized protein LOC113688035
LOC113700446	-2.4742269166602	cyclin-dependent kinase inhibitor 1 isoform X1
LOC113724692	-2.47228485458038	uncharacterized protein LOC113724692
LOC113707819	-2.47212182324481	tubulin beta chain
LOC113706500	-2.47108584982502	nucleobase-ascorbate transporter 12-like
LOC113712373	-2.47067075474672	uncharacterized protein LOC113712373 isoform X2
LOC113734093	-2.47038720770179	glucose-1-phosphate adenylyltransferase large subunit 3, chloroplastic/amyloplastic-like
LOC113712933	-2.464958633022	mitotic spindle checkpoint protein BUBR1
LOC113732457	-2.46205768351507	probable amidase At4g34880
LOC113734545	-2.45840340466092	probable metal-nicotianamine transporter YSL6 isoform X2
LOC113701511	-2.45800192536553	peptidyl-prolyl cis-trans isomerase FKBP17-2, chloroplastic-like
LOC113736428	-2.45459630538492	cold and drought-regulated protein CORA-like isoform X3
LOC113740604	-2.45260652146819	leucine-rich repeat receptor-like serine/threonine/tyrosine-protein kinase SOBIR1
LOC113727666	-2.45229641409252	GDSL esterase/lipase At5g03980-like
LOC113713810	-2.45194115882204	protein NRT1/ PTR FAMILY 2.11-like
LOC113724542	-2.4510932117919	uncharacterized protein LOC113724542
LOC113732340	-2.44992197332885	protein RETICULATA-RELATED 4, chloroplastic-like isoform X2
LOC113732133	-2.44851156724904	uncharacterized protein LOC113732133 isoform X2
LOC113692453	-2.44806242307617	beta-galactosidase-like
LOC113692763	-2.44691091852275	guanylate kinase 2-like isoform X1
LOC113709767	-2.44453072375237	photosystem I reaction center subunit III, chloroplastic-like
LOC113742190	-2.44410444179663	uncharacterized protein LOC113742190
LOC113710419	-2.44283456713434	photosystem I reaction center subunit psaK, chloroplastic
LOC113742146	-2.44260318773016	geranylgeranyl diphosphate reductase, chloroplastic
LOC113716791	-2.44237735141887	transcription factor BHLH089-like isoform X2
LOC113712193	-2.44107162793351	thylakoid lumenal 29 kDa protein, chloroplastic-like isoform X2
LOC113702176	-2.43984813800681	uncharacterized protein LOC113702176 isoform X6
LOC113727726	-2.43953868541346	endoglucanase 25-like
LOC113700095	-2.43936164865095	galactomannan galactosyltransferase 1-like
LOC113702372	-2.43567267332198	uncharacterized protein LOC113702372
LOC113698994	-2.42507903795522	protein CDI-like
LOC113724880	-2.42103877033857	protein IQ-DOMAIN 1-like
LOC113713088	-2.42072919864533	uncharacterized protein LOC113713088 isoform X2
LOC113701779	-2.42004962763424	probable galacturonosyltransferase 9
LOC113707789	-2.41932139381841	BAG family molecular chaperone regulator 3-like
LOC113711255	-2.41798787505778	internal alternative NAD(P)H-ubiquinone oxidoreductase A1, mitochondrial-like
LOC113698430	-2.41275670254962	xyloglucan galactosyltransferase XLT2-like
LOC113716977	-2.40791329315536	uncharacterized protein LOC113716977
LOC113739947	-2.40738253110926	rac-like GTP-binding protein ARAC8 isoform X1
LOC113700968	-2.40606247425483	haloacid dehalogenase-like hydrolase domain-containing protein At4g39970 isoform X2
LOC113716728	-2.40389144938777	LOW QUALITY PROTEIN: glyceraldehyde-3-phosphate dehydrogenase A, chloroplastic-like
LOC113689822	-2.40068610853084	chlorophyll a-b binding protein 36, chloroplastic
LOC113692838	-2.40002642907776	protein WVD2-like 4 isoform X2
LOC113730638	-2.39944384784542	LOW QUALITY PROTEIN: internal alternative NAD(P)H-ubiquinone oxidoreductase A1, mitochondrial-like
LOC113742898	-2.3978280529664	transcription factor MYBS1-like
LOC113710365	-2.39750200584795	uncharacterized protein LOC113710365
LOC113708828	-2.39629462521041	aquaporin PIP2-4-like
LOC113724972	-2.39607959001942	Unknown protein
LOC113707019	-2.39107233040163	U-box domain-containing protein 4-like
LOC113713402	-2.39007672673067	chloroplast envelope quinone oxidoreductase homolog
LOC113731123	-2.381524240456	integrin-linked protein kinase 1-like
LOC113695479	-2.38098407112965	zinc finger protein 8-like
LOC113712530	-2.37900027335177	deSI-like protein At4g17486
LOC113738129	-2.37752429640625	acyl-CoA-binding domain-containing protein 6
LOC113731226	-2.37600553232866	kinesin-like protein KIN-7D, mitochondrial
LOC113731628	-2.36764328019668	ABC transporter G family member 11-like
LOC113693636	-2.36675112101053	FCS-Like Zinc finger 13-like
LOC113691399	-2.35257543745264	uncharacterized protein At3g28850-like
LOC113713346	-2.35078372548424	patatin-like protein 2
LOC113701098	-2.34680681752682	photosynthetic NDH subunit of lumenal location 4, chloroplastic-like isoform X1
LOC113696335	-2.34659668793604	LRR receptor-like serine/threonine-protein kinase ERECTA
LOC113718492	-2.34547852359074	GATA transcription factor 16-like
LOC113693633	-2.34523876824165	lycopene epsilon cyclase, chloroplastic-like isoform X2
LOC113694247	-2.34508354703054	protein BIC1-like
LOC113704581	-2.34268693440545	uncharacterized protein LOC113704581
LOC113710262	-2.34264234408398	mitochondrial carnitine/acylcarnitine carrier-like protein
LOC113706787	-2.33563615959351	uncharacterized protein LOC113706787
LOC113696013	-2.33529619298888	guanylate kinase 2-like isoform X3
LOC113741934	-2.3323861887541	protein FANTASTIC FOUR 1-like
LOC113702058	-2.32914788387783	protein NSP-INTERACTING KINASE 1-like isoform X1
LOC113716676	-2.3279740829743	photosynthetic NDH subunit of lumenal location 2, chloroplastic
LOC113731577	-2.32672950542093	malate dehydrogenase, glyoxysomal-like
LOC113740420	-2.32600829822999	uncharacterized protein LOC113740420
LOC113732154	-2.3255741647115	beta-hexosaminidase 2-like
LOC113729379	-2.32489718740452	major antigen-like
LOC113728196	-2.32417745626294	uncharacterized protein LOC113728196 isoform X2
LOC113692703	-2.32197051241306	leucine-rich repeat receptor-like protein kinase TDR
LOC113712791	-2.32071109367778	uncharacterized protein LOC113712791
LOC113737082	-2.32037651591354	extensin-1-like isoform X2
LOC113703844	-2.31415714101757	bark storage protein A-like
LOC113742232	-2.31062910034647	TORTIFOLIA1-like protein 4
LOC113700105	-2.30964744279725	very-long-chain (3R)-3-hydroxyacyl-CoA dehydratase PASTICCINO 2-like
LOC113739930	-2.30789578251638	psbP-like protein 1, chloroplastic isoform X2
LOC113703921	-2.30394801559131	uncharacterized protein LOC113703921
LOC113737039	-2.2968678370842	protein PHR1-LIKE 3-like isoform X2
LOC113702075	-2.29443205547245	magnesium-chelatase subunit ChlI, chloroplastic-like
LOC113696970	-2.29420545636954	LOW QUALITY PROTEIN: lycopene epsilon cyclase, chloroplastic-like
LOC113726048	-2.29176582608643	receptor-like protein 4 isoform X2
LOC113699220	-2.29017928604574	LOW QUALITY PROTEIN: probable galacturonosyltransferase 9
LOC113688091	-2.28415047206788	acyl-CoA--sterol O-acyltransferase 1-like
LOC113703571	-2.28359344936336	cellulose synthase A catalytic subunit 1 [UDP-forming
LOC113741863	-2.27901899650354	beta-fructofuranosidase, insoluble isoenzyme CWINV1
LOC113694252	-2.27820978766009	peroxiredoxin Q, chloroplastic
LOC113731209	-2.27679907725428	kinesin-like protein KIN-7E
LOC113741534	-2.27445346329177	uncharacterized protein LOC113741534
LOC113703779	-2.27437153960189	ATP synthase subunit b', chloroplastic-like
LOC113743532	-2.27360141588455	photosystem II 10 kDa polypeptide, chloroplastic-like
LOC113688595	-2.27355784697637	protein RICE SALT SENSITIVE 3-like isoform X3
LOC113728209	-2.27289868486088	uncharacterized protein LOC113728209
LOC113698494	-2.2706106062786	serine carboxypeptidase-like 7
LOC113690956	-2.27038308094736	phospholipase A1-IIdelta-like
LOC113698165	-2.26860422371466	ribulose bisphosphate carboxylase small chain SSU8, chloroplastic-like
LOC113712780	-2.26516518107276	NAC domain-containing protein 83-like isoform X2
LOC113692206	-2.26465083512561	uncharacterized protein LOC113692206
LOC113701251	-2.25994798012843	protein indeterminate-domain 16-like isoform X1
LOC113697012	-2.25855217986208	uncharacterized protein LOC113697012
LOC113701878	-2.25737497433407	probable LRR receptor-like serine/threonine-protein kinase At4g37250
LOC113699651	-2.25373373601748	probable acyl-activating enzyme 18, peroxisomal isoform X2
LOC113725632	-2.23906490937114	uncharacterized protein LOC113725632
LOC113730943	-2.2347811758379	epoxide hydrolase A-like isoform X2
LOC113693527	-2.23399166374172	uncharacterized protein LOC113693527 isoform X1
LOC113736675	-2.23271913666642	probable sucrose-phosphate synthase 2
LOC113738029	-2.23207171329051	uncharacterized protein LOC113738029 isoform X2
LOC113693943	-2.23205085219155	sulfoquinovosyl transferase SQD2-like
LOC113733908	-2.22802312860989	uncharacterized protein LOC113733908
LOC113733266	-2.22006272402898	protein CURVATURE THYLAKOID 1A, chloroplastic-like
LOC113709253	-2.21504838933355	transcription termination factor MTEF1, chloroplastic-like
LOC113687964	-2.21323949034299	uncharacterized protein LOC113687964
LOC113691573	-2.21145501440047	transcription factor bHLH35-like
LOC113698028	-2.20854100148559	haloacid dehalogenase-like hydrolase domain-containing protein At4g39970 isoform X2
LOC113731852	-2.20842868622374	uncharacterized protein LOC113731852
LOC113728080	-2.20789725963453	glycerol-3-phosphate 2-O-acyltransferase 4-like
LOC113724891	-2.20725364749209	zinc finger protein CO3 isoform X2
LOC113704294	-2.20448284693562	3-ketoacyl-CoA synthase 11-like
LOC113706528	-2.20080384327337	LOW QUALITY PROTEIN: callose synthase 3-like
LOC113696012	-2.19286647308899	uncharacterized protein LOC113696012
LOC113734497	-2.1926010799678	protein ECERIFERUM 26-like
LOC113690423	-2.19224186725684	Unknown protein
LOC113704175	-2.19074611037995	glycerol-3-phosphate acyltransferase, chloroplastic-like isoform X2
LOC113688601	-2.18963569261267	uroporphyrinogen decarboxylase 1, chloroplastic-like
LOC113729908	-2.18866497792604	luminal-binding protein 5-like
LOC113730214	-2.18759642853778	uncharacterized protein LOC113730214 isoform X1
LOC113694063	-2.18731795053805	sodium/pyruvate cotransporter BASS2, chloroplastic-like
LOC113688275	-2.18729081106723	uncharacterized protein LOC113688275
LOC113714752	-2.18629589458016	filament-like plant protein 4
LOC113707003	-2.17601336276252	bifunctional UDP-glucose 4-epimerase and UDP-xylose 4-epimerase 1-like
LOC113700154	-2.17432547789225	leucine-rich repeat receptor-like serine/threonine-protein kinase BAM1
LOC113716527	-2.16923948060111	transcription factor MYB3-like
LOC113707657	-2.1669126958347	receptor-like serine/threonine-protein kinase NCRK isoform X2
LOC113712439	-2.16275594300079	glyceraldehyde-3-phosphate dehydrogenase B, chloroplastic
LOC113712118	-2.15923676480718	purple acid phosphatase-like
LOC113731839	-2.15855594004899	probable plastid-lipid-associated protein 4, chloroplastic isoform X3
LOC113689091	-2.15809681762382	oxygen-evolving enhancer protein 2, chloroplastic-like
LOC113715630	-2.15436583828097	photosystem II reaction center W protein, chloroplastic
LOC113715485	-2.14814545849061	non-specific lipid transfer protein GPI-anchored 1-like
LOC113687924	-2.14617572572953	protochlorophyllide-dependent translocon component 52, chloroplastic-like
LOC113698060	-2.14182639840686	probable esterase KAI2
LOC113718943	-2.14166055282764	receptor-like protein kinase FERONIA
LOC113691999	-2.14147390264652	uncharacterized protein LOC113691999
LOC113703602	-2.13952755363788	uncharacterized protein LOC113703602
LOC113742866	-2.13849682999376	ACT domain-containing protein ACR11-like isoform X1
LOC113712085	-2.13050432913947	11-beta-hydroxysteroid dehydrogenase-like 5
LOC113716433	-2.12941768653664	transcription factor MYB124
LOC113708987	-2.1292572077191	protein C2-DOMAIN ABA-RELATED 11
LOC113740565	-2.12907332171571	glutamyl-tRNA reductase-binding protein, chloroplastic-like
LOC113732043	-2.1283836941811	photosystem I reaction center subunit XI, chloroplastic-like
LOC113726186	-2.12665708608755	shaggy-related protein kinase eta isoform X2
LOC113728537	-2.1165205384941	uncharacterized protein LOC113728537
LOC113743585	-2.1163658906761	uncharacterized protein LOC113743585
LOC113712115	-2.11273743363031	plastocyanin
LOC113700390	-2.11110212297087	dehydrodolichyl diphosphate synthase 6-like isoform X1
LOC113732244	-2.11096574282713	Unknown protein
LOC113717219	-2.10928964429897	myb family transcription factor PHL8-like isoform X3
LOC113698936	-2.10316656933127	xyloglucan galactosyltransferase XLT2-like
LOC113717163	-2.10117679513313	serine carboxypeptidase-like 50
LOC113694971	-2.10110158033206	uncharacterized protein LOC113694971
LOC113717798	-2.09940691367331	uncharacterized protein LOC113717798
LOC113712834	-2.09885364953761	photosystem I reaction center subunit XI, chloroplastic-like
LOC113727012	-2.09677064818995	UDP-D-apiose/UDP-D-xylose synthase 2
LOC113713648	-2.09653711321017	oleoyl-acyl carrier protein thioesterase, chloroplastic-like
LOC113735612	-2.09436104412264	E3 ubiquitin-protein ligase MARCH1-like
LOC113710600	-2.0928166579752	uncharacterized protein LOC113710600
LOC113697518	-2.09130177617813	transcription repressor MYB5-like isoform X2
LOC113730160	-2.08632308238953	protein EXORDIUM-like 3
LOC113716915	-2.08547806328036	receptor-like protein kinase FERONIA
LOC113741841	-2.08436499602601	heparanase-like protein 2
LOC113715071	-2.08207900631274	uncharacterized protein LOC113715071 isoform X2
LOC113710025	-2.07938764106518	abscisic acid 8'-hydroxylase 2-like
LOC113697081	-2.07758164357902	Unknown protein
LOC113697049	-2.0753674969756	2-alkenal reductase (NADP(+)-dependent)-like
LOC113731060	-2.07500033035756	probable LRR receptor-like serine/threonine-protein kinase At3g47570 isoform X2
LOC113713775	-2.074725118317	LOW QUALITY PROTEIN: endoplasmin homolog
LOC113731184	-2.07046255889818	aquaporin-like
LOC113692840	-2.06656136281914	plastocyanin-like
LOC113692069	-2.06347986231049	myb-related protein 306-like
LOC113709711	-2.0620927873176	fasciclin-like arabinogalactan protein 4
LOC113701789	-2.06131098190316	zeaxanthin epoxidase, chloroplastic-like
LOC113739940	-2.0594818047116	protein SPIRAL1-like 2
LOC113702883	-2.05838995307984	granule-bound starch synthase 1, chloroplastic/amyloplastic-like
LOC113694624	-2.05319961246175	protein trichome birefringence-like 35
LOC113741439	-2.05305188690945	uncharacterized protein LOC113741439
LOC113712183	-2.05228357865524	uncharacterized protein LOC113712183 isoform X1
LOC113742311	-2.04904536426171	protein CURVATURE THYLAKOID 1C, chloroplastic isoform X1
LOC113726294	-2.04585117307888	glucose-1-phosphate adenylyltransferase large subunit 1-like
LOC113742668	-2.04537461998107	lysM domain receptor-like kinase 3
LOC113691470	-2.04318007256873	thioredoxin reductase NTRC-like
LOC113691034	-2.0427888966155	long-chain-alcohol O-fatty-acyltransferase-like
LOC113713245	-2.04089075020389	putative late blight resistance protein homolog R1A-10
LOC113732323	-2.03908210938698	Unknown protein
LOC113732250	-2.03897712109605	LOW QUALITY PROTEIN: cellulose synthase A catalytic subunit 3 [UDP-forming
LOC113726155	-2.03781690276158	endoribonuclease Dicer homolog 2-like isoform X3
LOC113728544	-2.03752969847179	LOW QUALITY PROTEIN: uncharacterized protein LOC113728544
LOC113718094	-2.03644294543503	cytosolic sulfotransferase 12-like
LOC113713184	-2.03641644538044	sugar transport protein 5-like
LOC113712788	-2.03015088867768	fructose-1,6-bisphosphatase, cytosolic-like
LOC113725536	-2.02858703917765	caffeoylshikimate esterase-like
LOC113688846	-2.02626503611975	chaperone protein dnaJ C76, chloroplastic-like
LOC113735002	-2.02430538674418	L-type lectin-domain containing receptor kinase IV.1-like
LOC113695126	-2.02347647290957	serine carboxypeptidase II-2-like isoform X2
LOC113726629	-2.01975410875597	protein EXORDIUM-like 2
LOC113736734	-2.0168182729802	calreticulin-3-like
LOC113708853	-2.01645734528709	aquaporin PIP2-7
LOC113716875	-2.01591164106183	uncharacterized protein LOC113716875
LOC113706716	-2.01160505841882	UDP-D-apiose/UDP-D-xylose synthase 2
LOC113727129	-2.00953803877078	serine carboxypeptidase-like 51
LOC113699267	-2.00594862436629	geranylgeranyl pyrophosphate synthase, chloroplastic-like
LOC113691699	-2.00523169210451	rRNA methyltransferase 1, mitochondrial-like
LOC113688095	-2.00291899680516	protein CELLULOSE SYNTHASE INTERACTIVE 1-like
LOC113694162	-2.00262713854115	L-type lectin-domain containing receptor kinase VIII.2-like
LOC113695693	-2.00015515340217	adenosine kinase 2
LOC113692972	-1.99973536789594	protein TSS-like
LOC113716833	-1.99005161905991	uncharacterized protein LOC113716833 isoform X1
LOC113714612	-1.98974203302395	phosphatidylinositol 4-phosphate 5-kinase 2-like
LOC113728213	-1.98776876519471	CBL-interacting serine/threonine-protein kinase 9 isoform X3
LOC113727020	-1.98589918600369	probable xyloglucan endotransglucosylase/hydrolase protein 30
LOC113714465	-1.98562809371984	photosystem II reaction center PSB28 protein, chloroplastic
LOC113729988	-1.97908688129323	UDP-glycosyltransferase 88B1-like
LOC113692484	-1.9777499984544	PHD finger protein ALFIN-LIKE 4-like
LOC113704390	-1.97395385361367	50S ribosomal protein L19-1, chloroplastic-like
LOC113736750	-1.97177059165738	uncharacterized protein LOC113736750
LOC113712825	-1.96938595487114	BRI1 kinase inhibitor 1-like
LOC113728179	-1.96876044101764	putative anthocyanidin reductase isoform X3
LOC113729489	-1.96819190985541	uncharacterized protein LOC113729489
LOC113728157	-1.9679122624311	protein CURVATURE THYLAKOID 1A, chloroplastic-like
LOC113734194	-1.96196300867863	uncharacterized protein LOC113734194
LOC113693805	-1.96173328946097	lysosomal Pro-X carboxypeptidase-like isoform X1
LOC113698282	-1.96156759077054	uncharacterized protein LOC113698282
LOC113690953	-1.96046142750951	GDSL esterase/lipase At4g10955
LOC113689639	-1.95804946268011	acyl-CoA--sterol O-acyltransferase 1-like
LOC113743757	-1.95068656489826	cyclin-U1-1-like
LOC113701491	-1.94929615439643	protein CELLULOSE SYNTHASE INTERACTIVE 1-like
LOC113690215	-1.94814534229602	uncharacterized protein LOC113690215
LOC113727828	-1.94679003486188	psbP domain-containing protein 1, chloroplastic-like
LOC113734884	-1.94531353747388	uncharacterized protein LOC113734884
LOC113741897	-1.9440152836937	cytochrome P450 71A1-like
LOC113690931	-1.94334881747419	uncharacterized protein LOC113690931
LOC113718795	-1.94293627250178	transcription factor MYB3-like
LOC113738697	-1.93971470097933	putative UPF0481 protein At3g02645
LOC113740196	-1.93911644830299	heparanase-like protein 2
LOC113696188	-1.93889914881648	2-oxoglutarate-Fe(II) type oxidoreductase hxnY-like
LOC113692806	-1.93599228096091	putative elongation factor TypA-like SVR3, chloroplastic isoform X3
LOC113702745	-1.93514346602233	uncharacterized protein At2g37660, chloroplastic-like
LOC113711156	-1.92911237302776	patatin-like protein 2
LOC113703720	-1.92870983065863	phosphoribulokinase, chloroplastic-like
LOC113717176	-1.92850325678672	MLP-like protein 34
LOC113693711	-1.92846673618134	auxin response factor 19-like isoform X2
LOC113699258	-1.92717134994934	phosphoenolpyruvate/phosphate translocator 2, chloroplastic-like
LOC113732919	-1.92083403462141	probable protein phosphatase 2C 34
LOC113706938	-1.92058546522649	probable sugar phosphate/phosphate translocator At1g12500
LOC113690713	-1.91089794891353	photosystem II 10 kDa polypeptide, chloroplastic
LOC113690428	-1.91073354642678	probable leucine-rich repeat receptor-like serine/threonine-protein kinase At3g14840
LOC113719161	-1.90752888727246	coiled-coil domain-containing protein SCD2
LOC113739632	-1.90751999008172	protein TSS-like isoform X2
LOC113730642	-1.90299404148612	uncharacterized protein LOC113730642 isoform X2
LOC113700172	-1.89961783911213	GATA transcription factor 5-like
LOC113738184	-1.89852485323579	glutamine synthetase leaf isozyme, chloroplastic-like
LOC113734308	-1.89746662071293	plastid-lipid-associated protein 6, chloroplastic
LOC113702187	-1.89547487629879	oxygen-evolving enhancer protein 1, chloroplastic
LOC113695950	-1.89507781900669	photosynthetic NDH subunit of subcomplex B 2, chloroplastic-like
LOC113715639	-1.89506772961524	RNA demethylase ALKBH10B-like
LOC113709407	-1.89402119390406	caffeoylshikimate esterase-like
LOC113718165	-1.89237013036635	blue-light photoreceptor PHR2-like
LOC113701236	-1.89020812012116	probable esterase KAI2
LOC113691904	-1.88939915859514	myb-related protein 306-like
LOC113716585	-1.88861971243227	chlorophyll a-b binding protein, chloroplastic-like
LOC113708959	-1.88843978990086	mitochondrial carnitine/acylcarnitine carrier-like protein
LOC113726240	-1.88834021746779	integrin-linked protein kinase 1-like
LOC113688335	-1.88089716408258	indole-3-acetic acid-amido synthetase GH3.10-like
LOC113719225	-1.88057555708857	protein SPIRAL1-like 2
LOC113687402	-1.879844066703	dirigent protein 2-like
LOC113713310	-1.87957837723546	E3 ubiquitin-protein ligase CHIP-like
LOC113719472	-1.87617144151158	NADP-dependent D-sorbitol-6-phosphate dehydrogenase-like
LOC113716755	-1.8750785983043	uncharacterized protein LOC113716755 isoform X5
LOC113726455	-1.87481541566486	protein IRX15-LIKE-like
LOC113739569	-1.87410120126178	protein MANNAN SYNTHESIS-RELATED 2-like isoform X2
LOC113719243	-1.87371627911543	photosystem II core complex proteins psbY, chloroplastic-like
LOC113719027	-1.87247417982128	LOW QUALITY PROTEIN: protoporphyrinogen oxidase, chloroplastic-like
LOC113707866	-1.8721874687926	bifunctional dihydrofolate reductase-thymidylate synthase-like isoform X4
LOC113731553	-1.87182967665854	uncharacterized protein LOC113731553
LOC113731210	-1.86899612309382	fructose-bisphosphate aldolase 1, chloroplastic-like
LOC113719530	-1.86688650228033	ankyrin repeat and death domain-containing protein 1A-like isoform X2
LOC113714501	-1.86677859018421	30S ribosomal protein S9, chloroplastic-like
LOC113705884	-1.86540484664146	serine carboxypeptidase-like 2 isoform X2
LOC113716969	-1.86472244880057	photosystem II core complex proteins psbY, chloroplastic-like
LOC113739402	-1.85852051359939	cytochrome P450 71A4-like
LOC113710048	-1.85723591264982	LOW QUALITY PROTEIN: BAG family molecular chaperone regulator 3-like
LOC113698884	-1.85534985301355	probable ribose-5-phosphate isomerase 3, chloroplastic
LOC113714539	-1.84957342852857	uncharacterized protein LOC113714539
LOC113732017	-1.84941023725086	dol-P-Man:Man(7)GlcNAc(2)-PP-Dol alpha-1,6-mannosyltransferase-like
LOC113733363	-1.84845788045966	CBL-interacting serine/threonine-protein kinase 9-like isoform X3
LOC113702084	-1.84827490273082	protein SPIRAL1-like 2
LOC113742241	-1.84464631739986	elongation factor TuB, chloroplastic
LOC113692638	-1.84092933149713	flavonol synthase/flavanone 3-hydroxylase-like
LOC113706907	-1.83871826034007	3-ketoacyl-CoA synthase 10
LOC113726036	-1.83739972171036	30S ribosomal protein S5, chloroplastic-like
LOC113708818	-1.83245705935926	glycerate dehydrogenase-like
LOC113712475	-1.82155494246506	peptidyl-prolyl cis-trans isomerase FKBP18, chloroplastic isoform X1
LOC113706872	-1.82119643180919	phosphoribulokinase, chloroplastic-like
LOC113701687	-1.8211354219146	uncharacterized protein LOC113701687
LOC113716478	-1.81529361677018	phosphoenolpyruvate carboxylase 4

## Sheet: SWD_vs_WW_aCO2_up
Gene ID	Log2FC	Protein Name
LOC113734971	9.64423306074806	uncharacterized protein LOC113734971
LOC113706185	9.28475396489703	expansin-like B1
LOC113703110	9.01252423485541	uncharacterized protein LOC113703110
LOC113729415	8.65279857480811	uncharacterized protein LOC113729415 isoform X1
LOC113709384	8.57392148089644	small ubiquitin-related modifier 1-like
LOC113711848	8.43073063224347	purine permease 1-like
LOC113741877	8.03836565543095	probable E3 ubiquitin-protein ligase ATL44
LOC113727267	7.87189942191693	Unknown protein
LOC113740745	7.75820384936981	F-box/kelch-repeat protein At3g06240-like
LOC113739757	7.6863264080734	G-type lectin S-receptor-like serine/threonine-protein kinase RKS1 isoform X1
LOC113717353	7.67158918575509	LOB domain-containing protein 40-like
LOC113706427	7.62027381210782	expansin-like B1
LOC113735417	7.47020011336469	transcription factor MYB48-like
LOC113740469	7.42770339612435	Unknown protein
LOC113713504	7.38010434742699	protein DMP6-like
LOC113728475	6.72393374525054	uncharacterized protein LOC113728475
LOC113737953	6.65746994432558	transcription factor MYB48-like
LOC113736293	6.55285743579585	cellulose synthase-like protein D1
LOC113706184	6.50559850064033	expansin-like B1
LOC113708785	6.44531688820879	putative 12-oxophytodienoate reductase 11
LOC113726026	6.10298962311275	uncharacterized protein LOC113726026 isoform X2
LOC113691476	5.90624541360625	ethylene-responsive transcription factor ERF011-like
LOC113736076	5.67111216587517	uncharacterized protein LOC113736076
LOC113736446	5.66741430730081	holotricin-3-like
LOC113703008	5.62153806524681	protein phosphatase 2C 51-like
LOC113725800	5.54667833251613	transketolase, chloroplastic-like
LOC113741996	5.51473633264242	late embryogenesis abundant protein Dc3-like
LOC113736441	5.34663166118582	glycine-rich cell wall structural protein-like isoform X1
LOC113692720	5.09838190554628	defensin-like protein P322
LOC113730979	5.07711802354832	uncharacterized protein LOC113730979 isoform X2
LOC113743740	4.9914376647294	60S ribosomal protein L10-like
LOC113723847	4.95537425880927	glycine-rich cell wall structural protein 2-like
LOC113737859	4.92786280599729	late embryogenesis abundant protein D-29-like
LOC113727830	4.91303496149609	galactinol synthase 2-like
LOC113733000	4.88942316648266	galactinol synthase 2-like
LOC113703289	4.86172736001989	protein STAY-GREEN, chloroplastic-like
LOC113731518	4.80597661442511	zinc finger protein ZAT10-like
LOC113726738	4.77224376666121	glutelin type-A 2-like isoform X1
LOC113690481	4.72712753448786	Unknown protein
LOC113725930	4.71875055678315	uncharacterized protein LOC113725930
LOC113700170	4.67499659835215	probable S-adenosylmethionine-dependent methyltransferase At5g37990
LOC113730430	4.64044349731168	uncharacterized protein LOC113730430
LOC113688640	4.63293358520464	uncharacterized protein LOC113688640
LOC113692465	4.60793236736172	UDP-glycosyltransferase 71K1-like
LOC113743457	4.58882391527992	beta-amylase-like
LOC113703905	4.55899154080633	alcohol dehydrogenase-like 7
LOC113707704	4.49282863576206	patatin-like protein 2
LOC113726525	4.45877159342127	zinc finger protein ZAT10-like
LOC113706564	4.42715352023538	protein phosphatase 2C 51-like
LOC113740289	4.38357110354992	thioredoxin-like 1-2, chloroplastic
LOC113709442	4.37598776843566	putative 12-oxophytodienoate reductase 11
LOC113703885	4.36457864354848	alcohol dehydrogenase-like 7 isoform X1
LOC113718755	4.35688048358827	probable WRKY transcription factor 75
LOC113690164	4.29674758438416	sodium/calcium exchanger NCL2-like
LOC113725531	4.28336111376929	Unknown protein
LOC113738415	4.23361613528271	cell division cycle-associated protein 7-like
LOC113732633	4.18429470328817	pathogenesis-related protein PR-4-like
LOC113715515	4.13775287243617	thaumatin-like protein
LOC113719470	4.13510119964852	Unknown protein
LOC113717312	4.13036515042763	non-specific lipid-transfer protein 1
LOC113741837	4.13015560457238	inositol oxygenase 1-like
LOC113709717	4.1275897853871	monosaccharide-sensing protein 2-like
LOC113690172	4.12649936885654	60S ribosomal protein L10-like
LOC113692543	4.11889177041255	putative phytosulfokines 6
LOC113715771	4.07808645308075	uncharacterized protein LOC113715771
LOC113692847	4.06717640520021	uncharacterized protein LOC113692847
LOC113695598	4.06656099072147	uncharacterized protein LOC113695598 isoform X2
LOC113710839	4.05712036890039	patatin-like protein 2
LOC113731861	4.04744321006204	glutelin type-A 2-like
LOC113695434	4.01754100145942	heat stress transcription factor B-3
LOC113717270	4.00764444832975	uncharacterized protein LOC113717270
LOC113700657	3.96935350813567	NAC domain-containing protein 104-like
LOC113726037	3.95760854423373	late embryogenesis abundant protein At3g53040-like
LOC113734212	3.90896685841412	major allergen Pru ar 1-like
LOC113715354	3.87654393579598	Unknown protein
LOC113690602	3.87516559953386	cytochrome P450 CYP72A219-like
LOC113743599	3.843791893633	NAC domain-containing protein 72-like
LOC113689826	3.82985277574258	NAC domain-containing protein 72-like
LOC113716523	3.79713715827263	probable WRKY transcription factor 75
LOC113715192	3.7893002563091	purine permease 3-like
LOC113717023	3.74565837485773	protein MIZU-KUSSEI 1
LOC113691066	3.71316915633019	peroxidase 3-like
LOC113731617	3.70594460547108	nicotinamidase 1-like isoform X2
LOC113717955	3.67281857305389	ABC transporter C family member 14-like
LOC113687791	3.65423165419266	amino acid transporter AVT1J-like
LOC113732907	3.64596399312979	pentatricopeptide repeat-containing protein At1g12300, mitochondrial-like
LOC113731956	3.63093813659412	protein NRT1/ PTR FAMILY 4.3
LOC113695644	3.59307285703972	class I heat shock protein-like
LOC113740436	3.58246821428677	late embryogenesis abundant protein Dc3-like
LOC113710244	3.55811758429015	fibrous sheath CABYR-binding protein-like
LOC113691985	3.5553493760244	nuclear transcription factor Y subunit A-4-like isoform X5
LOC113688069	3.54841100904517	glucan endo-1,3-beta-glucosidase 13-like
LOC113741729	3.52565229823874	uncharacterized protein LOC113741729 isoform X3
LOC113690773	3.46890282727856	7-deoxyloganetin glucosyltransferase-like
LOC113718876	3.46663331335301	ELMO domain-containing protein A-like isoform X5
LOC113695700	3.45922064900771	protein LE25-like
LOC113741792	3.44205608511239	uncharacterized protein LOC113741792
LOC113717301	3.42390618200686	uncharacterized protein LOC113717301
LOC113692546	3.41917071462225	Unknown protein
LOC113695400	3.40999171765641	EG45-like domain containing protein
LOC113707024	3.39881072800443	E3 ubiquitin-protein ligase RZFP34-like
LOC113712454	3.39710920764427	uncharacterized WD repeat-containing protein C2A9.03-like isoform X3
LOC113715360	3.39628472560062	Unknown protein
LOC113731022	3.37700087763962	glutamate receptor 2.7-like
LOC113742762	3.37247221958413	cell division cycle protein 48 homolog
LOC113695442	3.36875988546224	uncharacterized protein LOC113695442
LOC113743196	3.35215912555514	uncharacterized protein LOC113743196
LOC113702948	3.33330163105718	glutathione S-transferase T1-like
LOC113716537	3.32072089660538	Unknown protein
LOC113701999	3.3124879038558	uncharacterized protein LOC113701999
LOC113713518	3.31124473440318	cytochrome P450 CYP82D47-like
LOC113712000	3.30451516475428	protein PIN-LIKES 3-like
LOC113734166	3.30092990164958	uncharacterized protein LOC113734166
LOC113715518	3.29960725312133	alpha-galactosidase 1-like
LOC113694869	3.27957586604685	Unknown protein
LOC113706342	3.25704043440778	glutathione S-transferase T1-like
LOC113708005	3.25513981515456	monosaccharide-sensing protein 2-like
LOC113696044	3.25308439781634	uncharacterized protein LOC113696044
LOC113689740	3.24199378182828	uncharacterized protein LOC113689740
LOC113698674	3.22106291266099	late embryogenesis abundant protein D-29-like
LOC113716505	3.2189885723922	NAC domain-containing protein 2-like
LOC113695514	3.19729989158928	cysteine-rich and transmembrane domain-containing protein WIH1
LOC113695145	3.18935851605872	uncharacterized protein LOC113695145 isoform X1
LOC113725187	3.18667693594887	alcohol dehydrogenase-like 7
LOC113715660	3.18248026556501	nuclear poly(A) polymerase 1-like
LOC113730974	3.15967549305872	callose synthase 11-like
LOC113701838	3.15892168977925	pyridoxine/pyridoxamine 5'-phosphate oxidase 1, chloroplastic-like
LOC113714462	3.15802747388317	uncharacterized WD repeat-containing protein C2A9.03-like isoform X3
LOC113738141	3.14528576576221	inactive beta-amylase 9
LOC113734231	3.12733744357626	UDP-glucuronic acid decarboxylase 2-like
LOC113700277	3.10879868231883	Unknown protein
LOC113729382	3.10721382858645	probable protein phosphatase 2C 24
LOC113715194	3.09865629590774	calcium uniporter protein 4, mitochondrial-like
LOC113691774	3.09801806675244	putative polyol transporter 1
LOC113736526	3.09414305544055	UDP-glucuronic acid decarboxylase 2-like
LOC113711139	3.08719079881888	LOW QUALITY PROTEIN: zinc finger protein ZAT10-like
LOC113725086	3.07605837597104	Unknown protein
LOC113692853	3.06611669980533	probable galactinol--sucrose galactosyltransferase 6
LOC113718578	3.04732615674978	nuclear poly(A) polymerase 1-like
LOC113736389	3.04282132466238	sugar transporter ERD6-like 16 isoform X2
LOC113695062	3.03056940140802	dirigent protein 17-like
LOC113711842	3.01586769812341	pentatricopeptide repeat-containing protein At1g20230
LOC113726413	3.01332286703598	probable carboxylesterase 7
LOC113717848	3.00200251424203	translocator protein homolog
LOC113718921	2.98041781580032	isoflavone reductase homolog PCBER-like isoform X1
LOC113695658	2.97898347112812	uncharacterized protein LOC113695658
LOC113737795	2.9774186333639	uncharacterized protein LOC113737795
LOC113731725	2.97522501656722	uncharacterized protein LOC113731725 isoform X1
LOC113718268	2.9560976313727	LOW QUALITY PROTEIN: sucrose synthase 2-like
LOC113731176	2.94459948503253	uncharacterized protein LOC113731176
LOC113730296	2.94316404350459	arogenate dehydrogenase 1, chloroplastic-like isoform X3
LOC113713643	2.93461044792968	serine/threonine-protein kinase mph1-like
LOC113694531	2.92414240010147	polygalacturonase inhibitor-like
LOC113710230	2.90450716104217	probable protein phosphatase 2C 24
LOC113701458	2.8804929054925	ATP-dependent zinc metalloprotease FTSH 6, chloroplastic-like
LOC113687905	2.87327513608178	NAC domain-containing protein 21/22-like isoform X1
LOC113691374	2.87145520821718	uncharacterized protein LOC113691374
LOC113689858	2.85837254251009	LOW QUALITY PROTEIN: septum-promoting GTP-binding protein 1-like
LOC113694025	2.85734754708978	mitochondrial carrier protein CoAc2-like
LOC113736444	2.83450042396974	glycine-rich cell wall structural protein-like
LOC113697364	2.8311863261589	probable alpha,alpha-trehalose-phosphate synthase [UDP-forming
LOC113690227	2.82056361273982	uncharacterized protein LOC113690227
LOC113694109	2.80949240167593	zinc finger CCCH domain-containing protein 20-like
LOC113738233	2.78492694048622	sugar transport protein 13-like
LOC113738215	2.78309291908069	uncharacterized protein LOC113738215
LOC113713768	2.77285039953304	small ubiquitin-related modifier 1-like
LOC113705247	2.76353173740129	oleosin 1-like
LOC113717961	2.75719575681554	uncharacterized protein LOC113717961
LOC113743319	2.75574326000676	pathogen-related protein-like
LOC113718888	2.75434350429248	Unknown protein
LOC113694082	2.75367255582614	Unknown protein
LOC113698109	2.7532609880137	universal stress protein PHOS34-like
LOC113693709	2.7454900956319	Unknown protein
LOC113713262	2.74270366758782	uncharacterized protein LOC113713262 isoform X2
LOC113743611	2.7220018209455	septum-promoting GTP-binding protein 1-like
LOC113704068	2.71725516703345	oleosin 1-like isoform X1
LOC113741205	2.6961662811783	ubiquitin-conjugating enzyme E2-23 kDa-like isoform X1
LOC113712376	2.67898735565283	Unknown protein
LOC113743385	2.66302139374167	protein DETOXIFICATION 19-like isoform X2
LOC113687897	2.65164235058406	uncharacterized protein LOC113687897
LOC113737042	2.64573405744922	uncharacterized protein LOC113737042
LOC113726128	2.6397612269982	sinapine esterase-like isoform X5
LOC113705262	2.63573760325129	uncharacterized protein LOC113705262
LOC113697228	2.62639851685723	probable galactinol--sucrose galactosyltransferase 2
LOC113700048	2.60905661924081	Unknown protein
LOC113732999	2.60079393831777	galactinol synthase 2-like
LOC113695236	2.59978696242837	xyloglucan endotransglucosylase/hydrolase protein 22-like
LOC113741403	2.5972478168909	uncharacterized protein LOC113741403
LOC113703390	2.59366221221503	protein LURP-one-related 17
LOC113740041	2.57462458076774	uncharacterized protein LOC113740041 isoform X3
LOC113737105	2.55210645239067	uncharacterized protein LOC113737105 isoform X2
LOC113727738	2.53402823328857	putative pentatricopeptide repeat-containing protein At1g12700, mitochondrial
LOC113729868	2.52373777179234	small heat shock protein, chloroplastic
LOC113725999	2.51983798167217	CBS domain-containing protein CBSX5-like
LOC113726124	2.51195168364147	uncharacterized protein LOC113726124
LOC113721452	2.48927895771889	uncharacterized protein LOC113721452
LOC113699020	2.4870604758231	ACT domain-containing protein ACR1-like
LOC113731364	2.46260477699081	uncharacterized protein LOC113731364
LOC113706478	2.45648313135037	FBD-associated F-box protein At4g10400-like isoform X2
LOC113704386	2.45317681605346	heat shock protein 83-like
LOC113690394	2.44999409793847	homogentisate 1,2-dioxygenase
LOC113715786	2.44725713835691	protein DETOXIFICATION 16-like isoform X2
LOC113731421	2.44274786084605	abscisic acid 8'-hydroxylase 4-like
LOC113731538	2.43943706144827	flavonol synthase/flavanone 3-hydroxylase-like
LOC113697406	2.42702797710247	Unknown protein
LOC113719533	2.4254336452106	alpha-galactosidase 1-like
LOC113735267	2.42424224925046	sucrose synthase 2-like
LOC113701381	2.41991991060318	ACT domain-containing protein ACR1-like
LOC113725645	2.41704310679591	transcription factor DIVARICATA-like
LOC113743804	2.4125928595745	sigma intracellular receptor 2-like
LOC113724831	2.40866155177777	growth-regulating factor 8-like
LOC113736475	2.40345008269815	probable aldo-keto reductase 2
LOC113738724	2.36547761103894	Unknown protein
LOC113703873	2.36053235147415	alcohol dehydrogenase-like 7
LOC113738212	2.34556994720719	nuclear transcription factor Y subunit C-9-like isoform X2
LOC113713197	2.34395622658202	glucose-1-phosphate adenylyltransferase large subunit 1-like isoform X2
LOC113699393	2.34067491097587	homeobox-leucine zipper protein HAT22-like
LOC113695631	2.33724643516069	organic cation/carnitine transporter 7-like
LOC113717953	2.33102853026078	ninja-family protein AFP1-like
LOC113697015	2.32628920570325	amino acid transporter AVT1A-like isoform X2
LOC113743305	2.31619146112453	GEM-like protein 5
LOC113694276	2.31463325061246	Unknown protein
LOC113695129	2.30779737420701	uncharacterized protein LOC113695129
LOC113716372	2.30620404709626	ninja-family protein AFP1-like
LOC113716652	2.28799119635554	uncharacterized protein LOC113716652
LOC113734685	2.26523699479019	uncharacterized protein LOC113734685
LOC113698550	2.25786376206265	protein MKS1-like
LOC113691978	2.25662315813515	xyloglucan endotransglucosylase/hydrolase protein 22-like
LOC113713451	2.2533062394919	Unknown protein
LOC113741818	2.24937828981992	LOW QUALITY PROTEIN: polynucleotide 5'-hydroxyl-kinase NOL9
LOC113739508	2.24621638870053	U-box domain-containing protein 19-like
LOC113715231	2.21719909196998	Unknown protein
LOC113690255	2.21481879636887	anthocyanidin 3-O-glucosyltransferase 2-like
LOC113731646	2.21231333677612	peptidyl-prolyl cis-trans isomerase FKBP12-like
LOC113699301	2.21179502096617	probable acyl-activating enzyme 5, peroxisomal
LOC113694557	2.1844565943235	formin-like protein 7 isoform X3
LOC113731904	2.17207019109115	WEB family protein At3g51220
LOC113726763	2.16970130985233	Unknown protein
LOC113710359	2.16906949912862	17.3 kDa class I heat shock protein-like
LOC113718867	2.16541612939777	uncharacterized protein LOC113718867
LOC113695421	2.15686962324875	uncharacterized protein LOC113695421
LOC113700179	2.15350663659072	uncharacterized protein LOC113700179 isoform X1
LOC113699275	2.14614957179193	mannose-6-phosphate isomerase 1-like
LOC113730770	2.14554712968944	uncharacterized protein LOC113730770
LOC113713327	2.13496651019209	annexin D1-like
LOC113701701	2.1191074326464	probable acyl-activating enzyme 5, peroxisomal
LOC113702766	2.10937595154113	uncharacterized protein LOC113702766
LOC113718840	2.10843277602948	uncharacterized protein LOC113718840
LOC113709635	2.10625337695781	fumarylacetoacetase-like
LOC113700199	2.10076186427678	aspartyl protease family protein 1-like isoform X1
LOC113727885	2.0937142365176	Unknown protein
LOC113688614	2.08973968713598	tyrosine aminotransferase-like
LOC113742585	2.0881830051478	Unknown protein
LOC113736292	2.08093650945199	putative F-box protein PP2-B12
LOC113697536	2.07211787085029	putative phytosulfokines 6
LOC113726050	2.06929786004887	ethylene-responsive transcription factor 4-like
LOC113736294	2.0640444988193	F-box protein PP2-B10-like
LOC113691037	2.06321522233318	uncharacterized protein LOC113691037 isoform X2
LOC113716203	2.04270198684752	E3 ubiquitin-protein ligase RHA2A-like
LOC113708902	2.03697440675807	pterin-4-alpha-carbinolamine dehydratase 2, mitochondrial-like isoform X2
LOC113712611	2.02598065434836	iridoid synthase CYC2-like

## Sheet: SWD_vs_WW_eCO2_down
Gene ID	Log2FC	Protein Name
LOC113738057	-12.7735675985692	beta-D-xylosidase 1-like
LOC113714314	-12.1138034267596	germin-like protein subfamily 1 member 7
LOC113735907	-11.9322307035364	polygalacturonase 1 beta-like protein 3
LOC113687907	-11.4768251012231	trans-resveratrol di-O-methyltransferase-like
LOC113692724	-11.3780152535524	protein STRICTOSIDINE SYNTHASE-LIKE 2-like
LOC113714995	-11.3730323604276	subtilisin-like protease SBT1.9
LOC113697821	-11.1706734276938	probable xyloglucan endotransglucosylase/hydrolase protein 6
LOC113694667	-10.9577908009995	UPF0481 protein At3g47200-like
LOC113692188	-10.7625770109657	36.4 kDa proline-rich protein-like
LOC113730253	-10.6331886645926	expansin-A4-like
LOC113739852	-10.4707648610713	probable pectate lyase 18
LOC113699121	-10.4314087116615	expansin-A10
LOC113732393	-10.4236152436238	uncharacterized protein LOC113732393 isoform X2
LOC113732194	-10.3708430428618	beta-glucosidase 12-like
LOC113704387	-10.2583126059947	long-chain-alcohol oxidase FAO4A-like
LOC113701405	-9.99684562627362	probable galacturonosyltransferase-like 1
LOC113690892	-9.89292957186794	fasciclin-like arabinogalactan protein 13
LOC113688093	-9.85368025793575	O-acyltransferase WSD1-like
LOC113735485	-9.8416634234038	uncharacterized protein LOC113735485
LOC113690774	-9.78327856447235	GDSL esterase/lipase At2g04570-like
LOC113691131	-9.64571313462545	TBC1 domain family member 5 homolog A-like
LOC113733895	-9.62424176968018	beta-D-xylosidase 1-like
LOC113742340	-9.61558339595508	probable pectate lyase 18
LOC113731451	-9.55864469543897	uncharacterized protein At4g06744-like
LOC113718711	-9.52595212807016	3-ketoacyl-CoA synthase 6-like
LOC113692420	-9.49812168595781	uncharacterized protein LOC113692420
LOC113715433	-9.46738625021771	probable transmembrane ascorbate ferrireductase 4 isoform X1
LOC113714538	-9.42608860405883	endoglucanase 10-like
LOC113703538	-9.39285140922605	putative UPF0481 protein At3g02645
LOC113700216	-9.33772587324685	uncharacterized protein LOC113700216 isoform X4
LOC113724243	-9.31860297398079	rhicadhesin receptor-like
LOC113709399	-9.28006678205483	heavy metal-associated isoprenylated plant protein 7-like
LOC113733049	-9.17308201908814	protein NRT1/ PTR FAMILY 4.5-like isoform X1
LOC113688378	-9.09063041683085	acidic endochitinase-like
LOC113712924	-9.08154755395598	LOW QUALITY PROTEIN: UDP-glycosyltransferase 88F5-like
LOC113700447	-9.05672051505845	Unknown protein
LOC113736409	-9.03365622104041	xyloglucan endotransglucosylase/hydrolase 2-like
LOC113688553	-9.00213531833767	fasciclin-like arabinogalactan protein 7
LOC113742441	-8.98331866443045	protein ASPARTIC PROTEASE IN GUARD CELL 1-like
LOC113725542	-8.97547336812362	3-ketoacyl-CoA synthase 19-like
LOC113703349	-8.9736935837662	subtilisin-like protease SBT1.4
LOC113702461	-8.96259638911566	probable acyl-activating enzyme 6
LOC113707443	-8.91128731199294	ABC transporter B family member 10-like
LOC113734588	-8.84021856309565	transcription factor bHLH77-like
LOC113731911	-8.82881143872919	uncharacterized protein LOC113731911
LOC113714604	-8.82269244205605	purine permease 3-like
LOC113713503	-8.82096650296467	protein STAY-GREEN LIKE, chloroplastic-like
LOC113691355	-8.81525096172904	nudix hydrolase 8-like
LOC113708542	-8.75690820737809	apyrase-like
LOC113698462	-8.74933962864945	transcription factor bHLH96-like
LOC113726265	-8.72613405720596	thaumatin-like protein 1
LOC113697945	-8.71502478768833	Unknown protein
LOC113713192	-8.65237034105009	uncharacterized protein LOC113713192 isoform X1
LOC113739897	-8.59504530330072	protein SIEVE ELEMENT OCCLUSION B-like
LOC113705538	-8.57808518636404	myosin-3-like isoform X1
LOC113703073	-8.57695074059328	glucan endo-1,3-beta-glucosidase-like
LOC113732762	-8.5308856497069	histidine-containing phosphotransfer protein 1-like
LOC113743260	-8.46070953888901	uncharacterized protein LOC113743260
LOC113723978	-8.38249839790485	GDSL esterase/lipase At1g29670-like
LOC113709818	-8.37252608556996	putative E3 ubiquitin-protein ligase LIN
LOC113693129	-8.36998679609954	uncharacterized protein LOC113693129
LOC113705023	-8.3341339467749	probable inactive receptor kinase At4g23740
LOC113699226	-8.31209528691622	uncharacterized protein LOC113699226
LOC113701852	-8.30300849678603	ABC transporter G family member 15-like
LOC113688151	-8.25957188768867	GDSL esterase/lipase At2g04570-like
LOC113710343	-8.25941528101057	apyrase-like
LOC113742355	-8.25854599755617	thaumatin-like protein
LOC113703975	-8.25698496450388	14 kDa proline-rich protein DC2.15-like
LOC113698329	-8.24000293889245	G-type lectin S-receptor-like serine/threonine-protein kinase LECRK1
LOC113740587	-8.21910896405043	transcription factor MYB86-like
LOC113703007	-8.17901722175453	endoglucanase 6-like
LOC113706126	-8.08525862192335	putative UPF0481 protein At3g02645
LOC113701076	-8.08068751638243	protein IRX15-LIKE-like
LOC113697226	-8.04163981861035	probably inactive leucine-rich repeat receptor-like protein kinase At5g06940
LOC113737059	-8.01957077644551	Unknown protein
LOC113712873	-8.00683969478738	uncharacterized protein LOC113712873
LOC113742713	-7.98291822269291	protein SIEVE ELEMENT OCCLUSION B-like
LOC113687946	-7.9680226668898	probable LRR receptor-like serine/threonine-protein kinase At1g07650 isoform X2
LOC113692098	-7.94023964213948	cytochrome P450 71A1-like
LOC113737234	-7.90678149619601	protein STRICTOSIDINE SYNTHASE-LIKE 11-like
LOC113711970	-7.90483059619213	germin-like protein subfamily 1 member 7
LOC113740457	-7.90074553919838	alpha-galactosidase
LOC113738794	-7.88619616160549	protein PHYTOCHROME KINASE SUBSTRATE 3-like
LOC113703515	-7.879746374068	shikimate O-hydroxycinnamoyltransferase-like
LOC113707986	-7.87685417560269	berberine bridge enzyme-like 8
LOC113706762	-7.85890610921193	Unknown protein
LOC113742222	-7.83611342467304	protein HOTHEAD
LOC113698453	-7.83292419842285	probable galacturonosyltransferase-like 1
LOC113726185	-7.81600624083232	probable LRR receptor-like serine/threonine-protein kinase At5g45780 isoform X2
LOC113703267	-7.81032158358709	probable LRR receptor-like serine/threonine-protein kinase At3g47570
LOC113688020	-7.79281433853625	protein trichome birefringence-like 41
LOC113688126	-7.79247615628668	acetylserotonin O-methyltransferase-like
LOC113741677	-7.76670570352673	GDSL esterase/lipase APG-like
LOC113733372	-7.76597178598039	NAC domain-containing protein 43-like isoform X1
LOC113708541	-7.74927476997342	apyrase-like
LOC113710742	-7.73365771868681	cytochrome P450 CYP749A22-like
LOC113700503	-7.7017579055239	soyasapogenol B glucuronide galactosyltransferase-like
LOC113714573	-7.68149409208751	subtilisin-like protease SBT1.9
LOC113703358	-7.64868416139177	Unknown protein
LOC113725144	-7.64533946584982	21 kDa protein-like
LOC113711104	-7.58868218850446	protein STAY-GREEN LIKE, chloroplastic-like
LOC113701950	-7.57748470520763	leucine-rich repeat extensin-like protein 3
LOC113690089	-7.5760501358343	tryptophan decarboxylase TDC2-like
LOC113739883	-7.56222012970233	LRR receptor-like serine/threonine-protein kinase isoform X2
LOC113702496	-7.53557364925975	uncharacterized protein LOC113702496 isoform X2
LOC113715640	-7.52372997908207	pectinesterase-like
LOC113711762	-7.50797994055858	cyclin-D3-1-like
LOC113717001	-7.47425239794889	pectinesterase-like
LOC113699209	-7.46625916792461	subtilisin-like protease SBT1.7
LOC113732193	-7.45141270665658	beta-glucosidase 12-like isoform X2
LOC113698467	-7.44928441977299	scarecrow-like protein 32
LOC113701460	-7.44926464257496	Unknown protein
LOC113707080	-7.40582902375218	carboxylesterase 1-like
LOC113733696	-7.35784220971415	Unknown protein
LOC113732289	-7.34656368773425	probable glycosyltransferase STELLO1
LOC113695350	-7.32469522018501	NADPH-dependent oxidoreductase 2-alkenal reductase-like
LOC113730171	-7.32297103356502	21 kDa protein-like
LOC113725281	-7.3166785337248	expansin-A4-like
LOC113691568	-7.31551567201956	probable pectinesterase/pectinesterase inhibitor 12
LOC113731239	-7.29708056153947	beta-galactosidase 3-like
LOC113690568	-7.2900393468365	polyphenol oxidase I, chloroplastic-like
LOC113731050	-7.28409155032913	protein CHUP1, chloroplastic
LOC113695070	-7.28169499908722	ethylene-responsive transcription factor TINY-like
LOC113704477	-7.28043068576675	F-box protein At3g26010-like
LOC113741367	-7.2692447263847	spermidine hydroxycinnamoyl transferase-like
LOC113727888	-7.22202963807876	transcription factor MYB61-like
LOC113712592	-7.2146758311827	uncharacterized protein LOC113712592
LOC113698993	-7.20902184463284	receptor protein kinase TMK1-like isoform X2
LOC113694491	-7.20125553339803	auxin-binding protein ABP20-like
LOC113704040	-7.19178763264899	deacetylvindoline O-acetyltransferase-like
LOC113719396	-7.19140319723841	probable serine/threonine-protein kinase PBL28 isoform X1
LOC113707078	-7.18107801677792	probable carboxylesterase 120
LOC113727226	-7.17610564010387	probable amidase At4g34880
LOC113702917	-7.17205130536798	arabinogalactan protein 41-like
LOC113694671	-7.15097784978475	Unknown protein
LOC113703285	-7.13975296657919	ent-kaurenoic acid oxidase 2-like
LOC113730274	-7.11349449347879	uncharacterized protein LOC113730274
LOC113701871	-7.09741708375557	peroxidase 64-like isoform X1
LOC113712086	-7.0917359672006	phospholipase A1-IIbeta-like
LOC113740298	-7.08383811915012	cytosolic sulfotransferase 5-like isoform X1
LOC113703156	-7.06916734254997	BURP domain-containing protein 5-like
LOC113737011	-7.04858946436026	anthocyanidin 3-O-glucosyltransferase 2-like
LOC113702306	-7.04393083205736	protein trichome birefringence-like 34 isoform X2
LOC113715395	-7.03972367726175	heavy metal-associated isoprenylated plant protein 37-like
LOC113731084	-7.02449697293295	uncharacterized protein LOC113731084
LOC113736315	-7.01803862584958	uncharacterized protein LOC113736315 isoform X1
LOC113739656	-7.00526108936732	aspartyl protease family protein At5g10770-like
LOC113727050	-7.00010377885728	beta-glucosidase 12-like
LOC113702910	-6.98156419294713	protein NRT1/ PTR FAMILY 1.2-like isoform X1
LOC113708663	-6.97861930049783	cationic amino acid transporter 5-like
LOC113708131	-6.97697658124136	fasciclin-like arabinogalactan protein 12
LOC113731730	-6.96627439887418	ethylene-responsive transcription factor ERF038-like
LOC113727048	-6.90774513142127	beta-glucosidase 24-like
LOC113689829	-6.89593695032559	receptor-like protein kinase HSL1
LOC113707401	-6.89532185028594	BURP domain protein RD22-like
LOC113726680	-6.88505927219922	beta-xylosidase/alpha-L-arabinofuranosidase 2-like
LOC113715779	-6.87829492864967	protein PLANT CADMIUM RESISTANCE 2-like
LOC113699742	-6.87011117765968	probable methyltransferase At1g27930
LOC113732840	-6.86235594538453	probable linoleate 9S-lipoxygenase 5
LOC113726203	-6.86119319966485	transcription repressor OFP8-like
LOC113711966	-6.83463374602137	extensin-like isoform X2
LOC113697863	-6.83319725230495	peroxidase 51-like
LOC113701649	-6.83075834226412	3-ketoacyl-CoA synthase 6
LOC113726973	-6.82602796541016	uncharacterized protein LOC113726973
LOC113703798	-6.8258247787624	cinnamoyl-CoA reductase-like SNL6
LOC113694966	-6.8247543910382	uncharacterized protein LOC113694966 isoform X1
LOC113697283	-6.81193538932763	arabinogalactan protein 12-like
LOC113714420	-6.80806010253554	jasmonate O-methyltransferase-like isoform X2
LOC113695799	-6.7451836548127	copper transporter 1-like
LOC113705045	-6.73348953629771	Unknown protein
LOC113712496	-6.730150633015	endoglucanase 10-like
LOC113713568	-6.71964467629863	LOW QUALITY PROTEIN: cytokinin dehydrogenase 5-like
LOC113701179	-6.70922297977993	peroxidase 51-like
LOC113732020	-6.69684900775322	cyclin-U4-1-like
LOC113703211	-6.69491731405217	Unknown protein
LOC113704155	-6.69256725050475	probable inactive receptor kinase At5g10020
LOC113727890	-6.69111519499171	protein NRT1/ PTR FAMILY 4.3-like isoform X2
LOC113739721	-6.68064648924557	Unknown protein
LOC113691612	-6.66214517000612	auxin-binding protein ABP20-like
LOC113718589	-6.65715137939806	probable beta-D-xylosidase 2
LOC113717790	-6.64427618647263	cell number regulator 7-like
LOC113693721	-6.60802753561278	leucine-rich repeat extensin-like protein 4
LOC113709159	-6.60574802664206	methyl-CpG-binding domain-containing protein 7-like isoform X2
LOC113717912	-6.57133271107332	polygalacturonase-1 non-catalytic subunit beta-like
LOC113703155	-6.53095073067422	BURP domain-containing protein 3-like
LOC113707937	-6.52509185660561	cell number regulator 9-like
LOC113734998	-6.51588345548462	Unknown protein
LOC113714492	-6.48846308548625	protein NRT1/ PTR FAMILY 5.10-like isoform X3
LOC113739748	-6.48302724156608	probable metal-nicotianamine transporter YSL7
LOC113712774	-6.47966457367055	cytochrome P450 CYP82D47-like isoform X3
LOC113701137	-6.45549641428384	pathogenesis-related protein 5-like
LOC113719612	-6.42310264639852	protein NRT1/ PTR FAMILY 6.1-like
LOC113708720	-6.41308190829021	Unknown protein
LOC113714234	-6.40480903792342	extensin-like
LOC113738456	-6.40320520735886	transcription factor MYB86-like
LOC113706326	-6.39256663054623	transcription factor bHLH71-like isoform X3
LOC113698929	-6.38348090423623	leucine-rich repeat extensin-like protein 3
LOC113709837	-6.36128080007584	expansin-A6-like
LOC113707347	-6.35726807701822	pectin acetylesterase 8-like
LOC113705303	-6.34477203348446	uncharacterized protein LOC113705303
LOC113707209	-6.33356535749819	LOW QUALITY PROTEIN: cytochrome P450 86A22-like
LOC113730704	-6.33297239175537	cytochrome P450 77A2-like
LOC113730473	-6.32882970165111	expansin-A6-like
LOC113725143	-6.31674013342148	21 kDa protein-like
LOC113726065	-6.31469133756	protein E6-like isoform X1
LOC113703818	-6.30941871950924	probable carboxylesterase 120
LOC113731192	-6.29137554412597	auxin-responsive protein SAUR50-like
LOC113690269	-6.29096130808798	protein trichome birefringence-like 39
LOC113714232	-6.27085566451824	extensin-like
LOC113694170	-6.268530292871	receptor-like protein kinase FERONIA
LOC113718751	-6.24532678129537	amino acid transporter AVT1I-like
LOC113698269	-6.24376057319143	uncharacterized protein At4g06744-like
LOC113701593	-6.2202077529741	PLAT domain-containing protein 3-like
LOC113698433	-6.21860412652995	protein trichome birefringence-like 19
LOC113727561	-6.2109763431272	histidine-containing phosphotransfer protein 1-like
LOC113716646	-6.20424417720536	putative receptor-like protein kinase At3g47110 isoform X1
LOC113703822	-6.19570770180919	carboxylesterase 1-like
LOC113732152	-6.18381652505594	uncharacterized protein LOC113732152
LOC113730170	-6.12534589985593	21 kDa protein-like
LOC113737058	-6.09688236274066	berberine bridge enzyme-like 18
LOC113702739	-6.08672711105579	mavicyanin-like
LOC113726198	-6.08240868343764	transcription factor MYB80-like isoform X2
LOC113710008	-6.07432140773381	delta(12)-acyl-lipid-desaturase-like
LOC113696234	-6.06964050321421	leucine-rich repeat extensin-like protein 4
LOC113719452	-6.05691297889694	uncharacterized protein LOC113719452
LOC113693982	-6.02346920722635	probably inactive leucine-rich repeat receptor-like protein kinase At5g06940
LOC113713352	-6.01639120684382	extensin-like
LOC113701004	-5.99352335239647	cyclin-D3-1-like
LOC113700039	-5.97126692849564	thaumatin-like protein 1
LOC113734633	-5.96894910128738	transcription factor bHLH77-like
LOC113711983	-5.96628100141459	peroxidase 4-like
LOC113688215	-5.95381830545859	tabersonine 16-hydroxylase 2-like
LOC113727946	-5.94723976766104	fasciclin-like arabinogalactan protein 8
LOC113701892	-5.94153565306359	subtilisin-like protease SBT1.7
LOC113716416	-5.93565705287801	acidic endochitinase-like
LOC113732873	-5.93250386930766	transcription factor bHLH25-like
LOC113724011	-5.93059530067714	uncharacterized protein At4g06744-like
LOC113722360	-5.9286431200399	probable transcription factor KAN4 isoform X2
LOC113732279	-5.92263322069322	uncharacterized protein LOC113732279
LOC113718296	-5.9137628825431	cytochrome P450 71A1-like
LOC113693913	-5.84919965148314	secoisolariciresinol dehydrogenase-like
LOC113703212	-5.84833332047274	transcription factor bHLH71-like isoform X3
LOC113711027	-5.8396135082832	cytokinin dehydrogenase 5-like
LOC113731087	-5.83077430658695	CBL-interacting serine/threonine-protein kinase 20-like
LOC113703783	-5.80307418568009	pectin acetylesterase 8-like
LOC113735094	-5.79967825871725	uncharacterized protein LOC113735094
LOC113741765	-5.79165376553878	ethylene-responsive transcription factor TINY
LOC113730033	-5.78757751985235	BAHD acyltransferase DCR-like
LOC113736305	-5.78464719920546	Unknown protein
LOC113734691	-5.77581388592227	cellulose synthase-like protein G3 isoform X2
LOC113724721	-5.77544003164442	scarecrow-like protein 14
LOC113715459	-5.77528718744552	dammarenediol 12-hydroxylase-like isoform X3
LOC113690332	-5.76934518403605	xyloglucan endotransglucosylase/hydrolase protein 9-like
LOC113706128	-5.75300481506175	putative UPF0481 protein At3g02645
LOC113694321	-5.73286749989498	36.4 kDa proline-rich protein-like
LOC113742638	-5.72180766177073	uncharacterized protein LOC113742638
LOC113701060	-5.71488897891199	uncharacterized protein LOC113701060
LOC113734639	-5.71016466180142	cytochrome b561 and DOMON domain-containing protein At3g25290-like
LOC113716909	-5.70865012222042	TORTIFOLIA1-like protein 4
LOC113703888	-5.69422541098778	uncharacterized protein LOC113703888
LOC113725844	-5.69031845584214	probable xyloglucan endotransglucosylase/hydrolase protein 8
LOC113698717	-5.69003345062492	3-ketoacyl-CoA synthase 6-like
LOC113735075	-5.68754929283431	polygalacturonase At1g48100-like
LOC113703154	-5.68051674172555	BURP domain protein RD22-like
LOC113695105	-5.6630146080805	uncharacterized protein LOC113695105
LOC113730730	-5.64554121493742	bark storage protein A-like
LOC113697896	-5.63513767763221	probable acyl-activating enzyme 6
LOC113742697	-5.6199822524725	protein ASPARTIC PROTEASE IN GUARD CELL 1-like
LOC113732238	-5.61879822114734	E3 ubiquitin-protein ligase BIG BROTHER-like
LOC113701751	-5.61280410470686	alkane hydroxylase MAH1-like
LOC113728948	-5.60917750007618	germin-like protein subfamily T member 1
LOC113687906	-5.60498704513714	trans-resveratrol di-O-methyltransferase-like
LOC113725662	-5.59751532842495	Unknown protein
LOC113711763	-5.58956909631822	protein NRT1/ PTR FAMILY 5.10-like isoform X2
LOC113738382	-5.58613579791317	CASP-like protein 1F1
LOC113711903	-5.5822847220336	beta-D-glucosyl crocetin beta-1,6-glucosyltransferase-like
LOC113735055	-5.57992937300779	basic endochitinase-like
LOC113703627	-5.5632953490227	organic cation/carnitine transporter 3-like
LOC113706062	-5.55247252413852	uncharacterized protein LOC113706062
LOC113705443	-5.55166212236056	ethylene-responsive transcription factor WIN1-like
LOC113726246	-5.53306119974681	GDSL esterase/lipase At1g29670-like
LOC113703392	-5.48928635747963	histidine-rich glycoprotein-like
LOC113719716	-5.48536593466956	Unknown protein
LOC113736962	-5.48412255928275	UDP-glycosyltransferase 13-like
LOC113701486	-5.47372218475264	transcription factor bHLH96-like
LOC113703015	-5.47250738579397	ABC transporter C family member 10-like
LOC113705302	-5.46299797595567	probable carboxylesterase 120
LOC113702455	-5.45455687903199	PI-PLC X domain-containing protein At5g67130-like isoform X2
LOC113742115	-5.44659781522216	arabinogalactan protein 13-like
LOC113726031	-5.43281395530211	non-classical arabinogalactan protein 31-like
LOC113690410	-5.43059058007026	peroxidase 4-like
LOC113742797	-5.42777077322463	copper transporter 1-like
LOC113688075	-5.42169841280073	protein IQ-DOMAIN 1-like isoform X1
LOC113705455	-5.41476039460857	transcription repressor OFP8-like
LOC113705072	-5.41276827348081	anthranilate N-benzoyltransferase protein 2-like
LOC113708582	-5.40516617339398	probable receptor-like serine/threonine-protein kinase At5g57670
LOC113705665	-5.40199956484198	ankyrin repeat-containing protein BDA1-like
LOC113739462	-5.39944008990575	cytochrome P450 71A1-like
LOC113703828	-5.39793692072679	carboxylesterase 1-like
LOC113734200	-5.38776291696995	3-ketoacyl-CoA synthase 11-like
LOC113740320	-5.37890741203202	COBRA-like protein 4 isoform X3
LOC113716342	-5.37745862398822	polyphenol oxidase I, chloroplastic-like
LOC113710870	-5.37076404911245	transmembrane protein 136-like
LOC113690685	-5.36766879509641	fasciclin-like arabinogalactan protein 1
LOC113718817	-5.36764351237559	probable transmembrane ascorbate ferrireductase 3
LOC113710858	-5.36402872277422	cellulose synthase A catalytic subunit 2 [UDP-forming
LOC113737666	-5.36074311122999	receptor-like protein Cf-9
LOC113711710	-5.3587557557459	protein CHLOROPLAST IMPORT APPARATUS 2-like
LOC113703393	-5.35687244092169	sugar carrier protein C-like
LOC113701480	-5.35116580524172	uncharacterized protein LOC113701480
LOC113737140	-5.34530465817627	uncharacterized protein LOC113737140
LOC113727897	-5.34087227569762	germin-like protein 5-1
LOC113710318	-5.34010379582708	peroxidase 42-like
LOC113726674	-5.33970926295341	heavy metal-associated isoprenylated plant protein 5-like
LOC113709371	-5.33677356058908	Unknown protein
LOC113707102	-5.32170880940304	LRR receptor-like serine/threonine-protein kinase GSO1
LOC113706834	-5.31881752105405	cinnamoyl-CoA reductase-like SNL6
LOC113697214	-5.31151390828462	uncharacterized protein LOC113697214
LOC113714560	-5.31075409277883	protein WALLS ARE THIN 1-like
LOC113731015	-5.30713166460772	rac-like GTP-binding protein RAC13
LOC113701762	-5.28636162209176	STS14 protein
LOC113687910	-5.26448523836102	Unknown protein
LOC113703593	-5.25932956668307	zinc finger protein CONSTANS-LIKE 1-like isoform X1
LOC113742028	-5.2565615603832	protein CHUP1, chloroplastic-like
LOC113741302	-5.25562181490976	spermidine hydroxycinnamoyl transferase-like
LOC113743544	-5.24995109504539	G-type lectin S-receptor-like serine/threonine-protein kinase At4g03230
LOC113712794	-5.24663379719149	uncharacterized protein LOC113712794
LOC113706981	-5.2450786520676	vegetative cell wall protein gp1-like isoform X2
LOC113725407	-5.21959281354621	auxin transporter-like protein 2
LOC113726843	-5.21246915809094	ethylene-responsive transcription factor ERF038-like
LOC113730985	-5.20930837534209	non-classical arabinogalactan protein 31-like
LOC113713868	-5.20873706640202	oligopeptide transporter 4-like
LOC113733100	-5.20715691872174	SPX domain-containing membrane protein At4g22990-like
LOC113712215	-5.19797867321562	probable beta-D-xylosidase 7
LOC113688288	-5.19699805030173	fasciclin-like arabinogalactan protein 13
LOC113718214	-5.15252710493808	probable xyloglucan endotransglucosylase/hydrolase protein 33
LOC113737108	-5.14394463936096	uncharacterized protein LOC113737108
LOC113710403	-5.14207901166746	uncharacterized protein LOC113710403
LOC113714535	-5.14087821274682	probable receptor-like serine/threonine-protein kinase At5g57670
LOC113701164	-5.1401298062538	proteasome subunit beta type-5-B-like
LOC113701241	-5.13731038450691	FT-interacting protein 7-like
LOC113702953	-5.13537728275314	ABC transporter B family member 10-like
LOC113733949	-5.13140063998692	uncharacterized protein LOC113733949
LOC113735290	-5.1217674132946	probably inactive leucine-rich repeat receptor-like protein kinase At5g48380
LOC113742085	-5.11771616727451	(-)-germacrene D synthase-like
LOC113689054	-5.1169960883209	deacetylvindoline O-acetyltransferase-like
LOC113719666	-5.11009381806595	1-aminocyclopropane-1-carboxylate oxidase 1-like
LOC113725301	-5.10844872419148	uncharacterized protein LOC113725301
LOC113725727	-5.10346224720255	bark storage protein A-like
LOC113694588	-5.09319812691596	probable inactive leucine-rich repeat receptor-like protein kinase At3g03770
LOC113717184	-5.07697540823031	expansin-A1
LOC113735130	-5.07475852451738	putative disease resistance protein RGA4
LOC113735073	-5.07270051875897	trans-resveratrol di-O-methyltransferase-like
LOC113713366	-5.07245087789806	2-methylene-furan-3-one reductase-like
LOC113734704	-5.06008996645135	probably inactive leucine-rich repeat receptor-like protein kinase At3g28040
LOC113697900	-5.04954306976023	uncharacterized protein LOC113697900 isoform X1
LOC113692004	-5.04468630839179	beta-glucuronosyltransferase GlcAT14A-like
LOC113706646	-5.038831553897	Unknown protein
LOC113731496	-5.03267819916834	classical arabinogalactan protein 9-like
LOC113732068	-5.03105561943082	protein ECERIFERUM 1-like
LOC113734828	-5.02726230571849	CYC02 protein-like
LOC113692837	-5.01773343438003	fasciclin-like arabinogalactan protein 15
LOC113716874	-5.01525706377316	LOW QUALITY PROTEIN: protein NRT1/ PTR FAMILY 6.1-like
LOC113726957	-5.00102207877102	LOW QUALITY PROTEIN: glucomannan 4-beta-mannosyltransferase 2-like
LOC113730118	-4.9970371834624	peroxidase 66-like
LOC113703641	-4.9848963715024	L-ascorbate oxidase-like
LOC113731706	-4.98017093331468	beta-xylosidase/alpha-L-arabinofuranosidase 2-like
LOC113716344	-4.97672984390884	65-kDa microtubule-associated protein 6-like
LOC113741238	-4.97573964605807	uncharacterized protein LOC113741238
LOC113713509	-4.96164071343393	LOW QUALITY PROTEIN: isoflavone reductase homolog TP7-like
LOC113702302	-4.95971015057676	uncharacterized protein At4g06744-like
LOC113701357	-4.95137149103116	berberine bridge enzyme-like 22
LOC113716815	-4.93821916875426	receptor-like protein 4
LOC113715127	-4.93816107179585	FT-interacting protein 7-like
LOC113725760	-4.9357492137925	probable pectate lyase 12
LOC113715671	-4.93375539625285	uncharacterized protein LOC113715671
LOC113707187	-4.93188708623052	aquaporin TIP4-1-like
LOC113740136	-4.93173940504678	protein ASPARTIC PROTEASE IN GUARD CELL 1-like
LOC113704921	-4.93123107598147	LRR receptor-like serine/threonine-protein kinase GSO1
LOC113698113	-4.92205287844547	protein IRX15-LIKE-like
LOC113737753	-4.91826221459118	uncharacterized protein LOC113737753
LOC113731938	-4.91651575649246	glucuronoxylan 4-O-methyltransferase 1
LOC113716426	-4.91595331349236	3-ketoacyl-CoA synthase 6-like
LOC113701758	-4.91552242753235	receptor protein kinase TMK1-like isoform X2
LOC113734167	-4.90752756358676	VAN3-binding protein-like
LOC113699952	-4.9052110768094	probable glucan 1,3-beta-glucosidase A isoform X1
LOC113739952	-4.90398369550738	GDSL esterase/lipase At3g48460
LOC113736821	-4.90286913504518	uncharacterized protein LOC113736821 isoform X1
LOC113700676	-4.89877307757807	Unknown protein
LOC113731698	-4.88161288866182	uncharacterized protein LOC113731698
LOC113712775	-4.87068554477059	Unknown protein
LOC113730380	-4.86936995034677	auxin transporter-like protein 1 isoform X3
LOC113706388	-4.8562579714389	BURP domain protein RD22-like
LOC113718879	-4.85154011857147	Unknown protein
LOC113688506	-4.84435884611909	patatin-like protein 3
LOC113706592	-4.83692101183706	myb-related protein Zm38-like
LOC113706363	-4.79150796480474	BURP domain-containing protein 3-like
LOC113698334	-4.78950325071945	BTB/POZ domain-containing protein DOT3-like isoform X2
LOC113707654	-4.78851583216742	protein PYRICULARIA ORYZAE RESISTANCE 21-like isoform X1
LOC113735074	-4.77343352490381	trans-resveratrol di-O-methyltransferase-like
LOC113719362	-4.77156117072463	uncharacterized protein LOC113719362
LOC113733322	-4.75268972734869	ethylene-responsive transcription factor ERF023-like
LOC113727628	-4.74266844303105	probable linoleate 9S-lipoxygenase 5
LOC113701693	-4.74245590337793	uncharacterized protein LOC113701693
LOC113727481	-4.73850099816817	Unknown protein
LOC113704251	-4.73694549407604	protein ABIL2-like isoform X5
LOC113730464	-4.72530214192305	aspartic proteinase PCS1-like
LOC113702070	-4.71027322437036	protein COBRA-like
LOC113713486	-4.7091060706214	uncharacterized protein LOC113713486
LOC113688295	-4.70900343400447	anthocyanidin 3-O-glucosyltransferase 2-like
LOC113736549	-4.70422450636751	probably inactive leucine-rich repeat receptor-like protein kinase At3g28040
LOC113695815	-4.69401021740248	lysosomal Pro-X carboxypeptidase-like
LOC113735275	-4.69362124312739	L-type lectin-domain containing receptor kinase IV.1-like
LOC113711340	-4.68469225600623	uncharacterized protein LOC113711340
LOC113726096	-4.67632794551852	rac-like GTP-binding protein RAC13
LOC113743043	-4.65515662165338	alpha-galactosidase-like
LOC113726232	-4.65200879768959	probable LRR receptor-like serine/threonine-protein kinase At1g53430
LOC113708251	-4.64981962200357	auxin response factor 4-like isoform X3
LOC113696099	-4.64884751920941	patatin-like protein 3
LOC113703810	-4.64877990061009	vinorine synthase-like
LOC113735571	-4.64327074475441	uncharacterized protein LOC113735571
LOC113701715	-4.63777331869162	BTB/POZ domain-containing protein DOT3-like isoform X2
LOC113718905	-4.63607158733768	long chain acyl-CoA synthetase 1-like
LOC113732764	-4.61313819034575	receptor-like cytosolic serine/threonine-protein kinase RBK2 isoform X1
LOC113688516	-4.61293448645792	Unknown protein
LOC113714687	-4.60893241626389	oligopeptide transporter 4-like
LOC113695025	-4.60594852478227	alpha carbonic anhydrase 1, chloroplastic-like isoform X2
LOC113735095	-4.5930229001684	uncharacterized protein LOC113735095
LOC113704837	-4.58752821170959	probable LRR receptor-like serine/threonine-protein kinase At3g47570
LOC113706935	-4.58009820853562	BAG family molecular chaperone regulator 3-like
LOC113712462	-4.57500229342509	MDIS1-interacting receptor like kinase 2-like isoform X2
LOC113691740	-4.56510296838295	isoflavone reductase homolog PCBER-like
LOC113741587	-4.56373461083817	potassium channel SKOR-like isoform X3
LOC113707072	-4.54831410297662	probable carboxylesterase 120
LOC113712029	-4.54158541767102	metal transporter Nramp2-like
LOC113704958	-4.53297539178242	proline-rich receptor-like protein kinase PERK2
LOC113709596	-4.53075965095557	uncharacterized protein LOC113709596
LOC113694146	-4.51507812566449	protein NLP7-like isoform X1
LOC113719491	-4.51261772751149	disease resistance protein RPM1-like
LOC113703153	-4.51249238421398	BURP domain-containing protein 3-like
LOC113702960	-4.49703656172417	ethylene-responsive transcription factor WIN1-like
LOC113737732	-4.49606216083329	putative UPF0481 protein At3g02645
LOC113736975	-4.4909928353494	formin-like protein 1
LOC113739695	-4.48492835634068	probable inactive receptor kinase At1g48480
LOC113726171	-4.4754852228665	uncharacterized protein LOC113726171
LOC113719376	-4.4742187093206	probable xyloglucan endotransglucosylase/hydrolase protein 28
LOC113710465	-4.47073306695726	theobromine synthase 2
LOC113732826	-4.46903699551259	hyoscyamine 6-dioxygenase-like
LOC113741887	-4.46355623896955	ethylene-responsive transcription factor WIN1-like
LOC113713661	-4.45648554261496	auxin-responsive protein SAUR50-like
LOC113732333	-4.45631457626424	Unknown protein
LOC113708911	-4.44812292267552	cationic amino acid transporter 5-like
LOC113701267	-4.44395666375982	citrate-binding protein-like
LOC113712292	-4.44385678808114	probable receptor-like serine/threonine-protein kinase At5g57670
LOC113699068	-4.44266693287428	beta-galactosidase 3
LOC113741459	-4.44165450085777	GDSL esterase/lipase At5g03980-like
LOC113698218	-4.43951098308819	COBRA-like protein 4
LOC113702767	-4.43662695946727	type I inositol polyphosphate 5-phosphatase 2 isoform X3
LOC113735132	-4.43583343811328	UDP-glycosyltransferase 708C2-like
LOC113704053	-4.43562329146653	non-specific lipid-transfer protein-like protein At2g13820
LOC113725593	-4.43203363334714	Unknown protein
LOC113690815	-4.43169124682905	O-acyltransferase WSD1-like
LOC113726578	-4.4294293153654	gamma-glutamyl peptidase 5-like
LOC113694622	-4.42116324878316	uncharacterized protein LOC113694622 isoform X2
LOC113730133	-4.42089793436874	alpha-L-fucosidase 1-like
LOC113725133	-4.41975773981593	protein EXORDIUM-like 3
LOC113688211	-4.41301944684347	GATA zinc finger domain-containing protein 14-like
LOC113689971	-4.41225463594474	trans-resveratrol di-O-methyltransferase-like
LOC113704211	-4.41084955804479	spermidine hydroxycinnamoyl transferase-like
LOC113716370	-4.40999232109347	uncharacterized protein LOC113716370 isoform X2
LOC113731599	-4.40029064078673	oligopeptide transporter 4-like
LOC113688811	-4.39922394948527	polyphenol oxidase I, chloroplastic-like isoform X2
LOC113717969	-4.39572708247985	65-kDa microtubule-associated protein 6-like
LOC113707183	-4.38766574778709	BURP domain protein RD22-like
LOC113703784	-4.3844024485137	BAG family molecular chaperone regulator 1-like
LOC113742753	-4.38297484414028	aquaporin TIP2-1
LOC113691028	-4.37686895154065	LRR receptor-like serine/threonine-protein kinase GSO2
LOC113712715	-4.37377397252187	protein ECERIFERUM 2-like
LOC113689832	-4.36581470887749	polyphenol oxidase I, chloroplastic-like
LOC113725272	-4.35504943544855	probable LRR receptor-like serine/threonine-protein kinase IRK
LOC113729938	-4.35478348574281	probable pectinesterase/pectinesterase inhibitor 34
LOC113712338	-4.34874106303322	immune-associated nucleotide-binding protein 9-like
LOC113708659	-4.34862131379884	chlorophyll a-b binding protein of LHCII type 1-like
LOC113705407	-4.34327117955248	probable aspartyl protease At4g16563
LOC113706875	-4.34071220291519	14 kDa proline-rich protein DC2.15-like
LOC113734688	-4.3335656928271	MDIS1-interacting receptor like kinase 2-like isoform X1
LOC113736003	-4.32331320022339	putative UPF0481 protein At3g02645
LOC113742299	-4.31834049434925	protein ASPARTIC PROTEASE IN GUARD CELL 1-like
LOC113735870	-4.30924362856207	polygalacturonase 1 beta-like protein 2
LOC113728478	-4.30713058295912	kinesin-like protein KIN-5D
LOC113709280	-4.2920337419111	purine permease 21-like
LOC113717036	-4.29201936267	cyclin-D1-1-like
LOC113726411	-4.28928577207463	LOW QUALITY PROTEIN: rho GTPase-activating protein 1-like
LOC113688944	-4.28200733625116	probable galacturonosyltransferase 12
LOC113739483	-4.2695213810602	protein CHUP1, chloroplastic-like
LOC113735163	-4.26735557675013	protein STRICTOSIDINE SYNTHASE-LIKE 11-like
LOC113690571	-4.26691935688048	Unknown protein
LOC113697158	-4.26204593575313	uncharacterized protein LOC113697158
LOC113702113	-4.25967519943212	serine/threonine-protein kinase SAPK1-like isoform X3
LOC113728943	-4.25754953069014	uncharacterized protein LOC113728943
LOC113724807	-4.25506883409503	LOW QUALITY PROTEIN: UNC93-like protein 1
LOC113724994	-4.24944005612874	BAHD acyltransferase DCR-like
LOC113695753	-4.2357133910972	Unknown protein
LOC113690091	-4.21716906051249	glucose-6-phosphate/phosphate translocator 2, chloroplastic-like
LOC113712313	-4.20759511746087	probable inactive receptor kinase At5g58300
LOC113703907	-4.20032813513306	protein NDL2-like
LOC113714791	-4.19076603894944	hexokinase-2, chloroplastic
LOC113708537	-4.1891346949689	subtilisin-like protease SBT5.6
LOC113723806	-4.18367038377886	cytosolic sulfotransferase 5-like
LOC113711516	-4.18137455779013	protein RALF-like 27
LOC113702926	-4.17472583989172	BURP domain protein RD22-like
LOC113736897	-4.17029373891878	trans-resveratrol di-O-methyltransferase-like
LOC113715087	-4.16885960435215	serine/threonine-protein kinase-like protein At3g51990
LOC113688192	-4.16831557811777	kinesin-like protein KIN-14F isoform X3
LOC113698096	-4.16690465084239	vegetative cell wall protein gp1-like
LOC113704825	-4.16592060203452	uncharacterized protein LOC113704825
LOC113709349	-4.16264397249062	protein PYRICULARIA ORYZAE RESISTANCE 21-like isoform X1
LOC113742279	-4.16227071253785	probable inactive receptor kinase At1g48480
LOC113737726	-4.15954722332809	UDP-glycosyltransferase 13-like
LOC113705348	-4.1580434322916	serine/threonine-protein kinase Nek5-like isoform X2
LOC113732451	-4.15674711004127	probable amidase At4g34880
LOC113702404	-4.15458146430934	protein DETOXIFICATION 45, chloroplastic-like isoform X2
LOC113714558	-4.15240740544492	extensin-like
LOC113731037	-4.15093902621753	GDSL esterase/lipase At1g28590-like isoform X2
LOC113695092	-4.15076270409823	receptor-like protein kinase FERONIA
LOC113710866	-4.1474367137951	receptor protein kinase CLAVATA1-like
LOC113714542	-4.14451234157894	fasciclin-like arabinogalactan protein 2
LOC113699081	-4.1432893956904	berberine bridge enzyme-like 22
LOC113695301	-4.13830654356912	Unknown protein
LOC113703052	-4.13478630855225	protein HOTHEAD-like
LOC113689815	-4.12619456242481	uncharacterized protein LOC113689815
LOC113727984	-4.12458608344358	SPX domain-containing membrane protein At4g22990-like isoform X1
LOC113699090	-4.1229466098185	uncharacterized protein LOC113699090
LOC113700955	-4.12278316301647	putative late blight resistance protein homolog R1A-3
LOC113741256	-4.11843294949405	beta-galactosidase
LOC113698928	-4.11599585000194	probable inactive receptor kinase At5g67200
LOC113708886	-4.11377662157325	magnesium protoporphyrin IX methyltransferase, chloroplastic-like
LOC113738674	-4.11258601353211	Unknown protein
LOC113735134	-4.11207189693551	UDP-glycosyltransferase 708C1-like
LOC113715804	-4.10967578261443	wall-associated receptor kinase-like 20
LOC113731442	-4.10464256438016	filament-like plant protein 7
LOC113726199	-4.10049839779631	transcription factor MYB8-like
LOC113734504	-4.09509149183978	UDP-glucuronate 4-epimerase 6-like
LOC113712321	-4.09332158901872	uncharacterized protein LOC113712321
LOC113716577	-4.09173234821348	thaumatin-like protein isoform X1
LOC113733048	-4.09163920132758	pectin acetylesterase 12-like
LOC113710849	-4.08671432916523	probable isoaspartyl peptidase/L-asparaginase 2
LOC113742449	-4.08545762744814	auxin response factor 4-like
LOC113727860	-4.08432028995353	probable receptor-like protein kinase At2g42960
LOC113700977	-4.0832163012682	protein trichome birefringence-like 19
LOC113707077	-4.08300024277648	mavicyanin-like
LOC113727112	-4.07801500808516	probable glycosyltransferase STELLO1
LOC113702741	-4.07081746654782	uncharacterized protein LOC113702741 isoform X1
LOC113699204	-4.07022255899108	uncharacterized protein LOC113699204
LOC113699980	-4.0677763520797	lamin-like protein
LOC113727565	-4.06638343878995	sugar transporter ERD6-like 5 isoform X4
LOC113725846	-4.06557913342626	molybdopterin biosynthesis protein CNX1-like isoform X2
LOC113699255	-4.06159543665735	MADS-box protein SVP-like
LOC113708927	-4.06007109392999	probable LRR receptor-like serine/threonine-protein kinase At4g20940
LOC113725729	-4.05905956329235	bark storage protein A-like
LOC113701428	-4.05085119753479	diacylglycerol O-acyltransferase 2-like
LOC113714609	-4.04962365213757	7-deoxyloganetin glucosyltransferase-like
LOC113725882	-4.04932150977315	G-type lectin S-receptor-like serine/threonine-protein kinase At4g27290 isoform X1
LOC113701597	-4.04568549024353	probable calcium-binding protein CML41
LOC113710852	-4.04388766099243	receptor kinase-like protein Xa21
LOC113716864	-4.04342042329784	probable inactive purple acid phosphatase 1 isoform X2
LOC113716348	-4.04131982385306	probable LRR receptor-like serine/threonine-protein kinase At3g47570
LOC113703632	-4.03621860187346	vegetative cell wall protein gp1-like
LOC113743800	-4.0307629494335	glucose-6-phosphate/phosphate translocator 2, chloroplastic-like
LOC113690288	-4.02993146394534	putative late blight resistance protein homolog R1A-3
LOC113719507	-4.02141219548915	MLP-like protein 34
LOC113731807	-4.0183002994582	LRR receptor-like serine/threonine-protein kinase GSO2
LOC113693612	-4.0176628039753	protein OCTOPUS-like
LOC113724009	-4.01365672084379	filament-like plant protein 7
LOC113706149	-4.01318797583452	probable LRR receptor-like serine/threonine-protein kinase At1g34110
LOC113742031	-4.0128279324797	uncharacterized protein LOC113742031
LOC113714790	-4.00415500988507	immune-associated nucleotide-binding protein 9-like
LOC113743041	-4.00385442236211	transmembrane protein 87A-like
LOC113705635	-4.00286483241989	patatin-like protein 1 isoform X1
LOC113719264	-4.00275409244713	cyclin-D1-1-like
LOC113711010	-4.00161974115353	purine permease 3-like
LOC113700062	-3.99557471989409	serine/threonine-protein kinase SAPK1-like isoform X3
LOC113692740	-3.99457455663936	uncharacterized protein LOC113692740
LOC113700848	-3.99395518504756	WAT1-related protein At5g40230-like
LOC113687744	-3.99285958688115	squamosa promoter-binding-like protein 3
LOC113743047	-3.99161993842435	RING-H2 finger protein ATL73-like
LOC113726446	-3.97558662035927	caffeoyl-CoA O-methyltransferase 5-like
LOC113713304	-3.97507225177265	cellulose synthase A catalytic subunit 2 [UDP-forming
LOC113711857	-3.97463325921409	protein MIZU-KUSSEI 1-like
LOC113742772	-3.97151697649615	subtilisin-like protease SBT2.5
LOC113691103	-3.95900778934516	probable LRR receptor-like serine/threonine-protein kinase At1g56140 isoform X3
LOC113696292	-3.95464109688263	uncharacterized protein LOC113696292
LOC113693745	-3.95349875886031	isoflavone reductase homolog PCBER-like
LOC113734227	-3.95185432041743	protein WVD2-like 3 isoform X2
LOC113701909	-3.94788063361658	ABC transporter G family member 15-like
LOC113702771	-3.94399164051581	probable methyltransferase PMT20
LOC113693778	-3.93961036512567	uncharacterized protein LOC113693778
LOC113707428	-3.9373400477808	probable glycosyltransferase At5g03795
LOC113722143	-3.93579021898238	LOW QUALITY PROTEIN: ABC transporter G family member 15-like
LOC113703382	-3.93025207710392	xyloglucan endotransglucosylase/hydrolase 2-like
LOC113719546	-3.93006923406893	probable RNA-dependent RNA polymerase 1
LOC113708573	-3.92032055934613	delta(24)-sterol reductase-like
LOC113688403	-3.91713559656587	tabersonine 16-O-methyltransferase-like
LOC113717392	-3.91175862832718	classical arabinogalactan protein 26-like
LOC113696684	-3.91099379863577	alpha-L-arabinofuranosidase 1-like isoform X2
LOC113728222	-3.89600326874519	uncharacterized protein LOC113728222
LOC113708425	-3.89231132438424	interactor of constitutive active ROPs 3-like isoform X2
LOC113701127	-3.89208857699236	protein LONGIFOLIA 1-like
LOC113688584	-3.88951626458004	septum-promoting GTP-binding protein 1-like
LOC113698417	-3.88839928423152	auxin-responsive protein IAA9-like
LOC113688566	-3.8881648450654	putative late blight resistance protein homolog R1B-14
LOC113712394	-3.88410178873757	ABC transporter B family member 13-like
LOC113695211	-3.881219244649	probable beta-1,4-xylosyltransferase IRX9
LOC113703837	-3.87634770234283	14 kDa proline-rich protein DC2.15-like
LOC113726476	-3.87588646630142	uncharacterized protein LOC113726476
LOC113716818	-3.87500437679422	AP2/ERF and B3 domain-containing transcription factor RAV1-like
LOC113713204	-3.87472841879427	tubulin alpha-4 chain-like isoform X1
LOC113707202	-3.87439515295613	Unknown protein
LOC113698005	-3.87327140734292	cyclin-D3-1-like
LOC113712816	-3.86932220362805	uncharacterized protein LOC113712816
LOC113716767	-3.86913923238068	receptor-like protein 4
LOC113701029	-3.86603604275879	thaumatin-like protein 1
LOC113741412	-3.86198220700389	uncharacterized protein LOC113741412
LOC113726969	-3.8552337144764	uncharacterized protein LOC113726969
LOC113725864	-3.85007373321794	oxygen-evolving enhancer protein 3-2, chloroplastic-like
LOC113688891	-3.8448175471235	tabersonine 16-hydroxylase 1-like
LOC113699604	-3.84081284122748	putative late blight resistance protein homolog R1A-3
LOC113713330	-3.836871692292	probable isoaspartyl peptidase/L-asparaginase 2
LOC113703597	-3.83479327643501	transcription factor GLABRA 3-like isoform X3
LOC113718784	-3.83449167805268	MLP-like protein 423
LOC113742589	-3.82964810757453	GDSL esterase/lipase APG-like
LOC113724107	-3.82729744246866	VQ motif-containing protein 25-like
LOC113708682	-3.8241446560391	peroxidase 42-like
LOC113687527	-3.82344332720225	G-type lectin S-receptor-like serine/threonine-protein kinase At4g03230
LOC113706796	-3.82208748335511	protein HOTHEAD-like
LOC113711383	-3.81815657609971	protein CHUP1, chloroplastic-like isoform X2
LOC113703331	-3.81520270563543	protein LITTLE ZIPPER 1-like
LOC113732459	-3.81132097708904	S-norcoclaurine synthase 2-like
LOC113728487	-3.80765035762373	chitinase 2-like
LOC113693684	-3.80690965515191	alpha carbonic anhydrase 1, chloroplastic-like isoform X2
LOC113730850	-3.7967115631929	oxygen-evolving enhancer protein 3-2, chloroplastic-like
LOC113739892	-3.79616326302849	uncharacterized protein LOC113739892 isoform X2
LOC113728079	-3.78812423800316	cytochrome P450 86A8-like
LOC113698252	-3.78081643002492	G-type lectin S-receptor-like serine/threonine-protein kinase LECRK1
LOC113727657	-3.77997079691611	heavy metal-associated isoprenylated plant protein 35-like
LOC113704904	-3.77951951573944	putative UPF0481 protein At3g02645
LOC113702398	-3.77569292089665	probable pectinesterase/pectinesterase inhibitor 51
LOC113707855	-3.77374784889077	uncharacterized protein YKR070W-like isoform X2
LOC113688080	-3.7712637693983	LRR receptor-like serine/threonine-protein kinase
LOC113708882	-3.76665653821812	1-aminocyclopropane-1-carboxylate oxidase
LOC113701947	-3.76104791795343	MADS-box protein SVP-like isoform X2
LOC113703589	-3.75637596440149	putative UPF0481 protein At3g02645
LOC113719667	-3.75279255532698	kirola-like
LOC113696017	-3.74928228891563	protein NRT1/ PTR FAMILY 3.1-like
LOC113732105	-3.74851344087273	probable xyloglucan endotransglucosylase/hydrolase protein 30
LOC113690024	-3.74635718480454	Unknown protein
LOC113691737	-3.74512058442564	isoflavone reductase homolog PCBER-like
LOC113710844	-3.74148996260866	inositol transporter 4-like
LOC113701790	-3.73937879963572	uncharacterized protein LOC113701790 isoform X2
LOC113725598	-3.73570825494305	receptor-like protein 53
LOC113724886	-3.72679361168288	probable pectinesterase/pectinesterase inhibitor 34
LOC113732601	-3.72151398443854	probable inactive leucine-rich repeat receptor-like protein kinase At3g03770
LOC113735220	-3.72129230540255	uncharacterized protein LOC113735220
LOC113692132	-3.72056733670946	uncharacterized protein LOC113692132 isoform X1
LOC113738367	-3.71998271033952	transcription factor bHLH79-like
LOC113707206	-3.71593398118502	rop guanine nucleotide exchange factor 14-like isoform X3
LOC113739745	-3.71525120021282	subtilisin-like protease SBT2.5
LOC113732882	-3.71273187445003	heparan-alpha-glucosaminide N-acetyltransferase-like
LOC113741333	-3.70892840308987	tropinone reductase homolog At2g29340-like
LOC113706206	-3.7041126942359	uncharacterized protein LOC113706206
LOC113706660	-3.70005333302013	putative receptor-like protein kinase At3g47110
LOC113729928	-3.69350602583755	protein IQ-DOMAIN 1-like isoform X2
LOC113730224	-3.69264647056834	probable inactive receptor kinase At5g58300
LOC113691281	-3.68972639117859	uncharacterized protein LOC113691281
LOC113697275	-3.68925236208585	uncharacterized protein At4g15970-like
LOC113712472	-3.6879008235752	uncharacterized protein LOC113712472
LOC113712100	-3.68583303384509	glucuronoxylan 4-O-methyltransferase 3-like
LOC113698425	-3.68326718315633	uncharacterized protein LOC113698425
LOC113726192	-3.68316106452363	Unknown protein
LOC113697187	-3.68291671092336	auxin transporter-like protein 2
LOC113742131	-3.68036033941974	uncharacterized protein LOC113742131 isoform X2
LOC113705508	-3.66891342687215	BURP domain protein RD22-like
LOC113741734	-3.66818114274452	protein PHYTOCHROME KINASE SUBSTRATE 3-like
LOC113719715	-3.66460093846626	UDP-glycosyltransferase 83A1-like
LOC113733896	-3.65826077406642	uncharacterized protein LOC113733896
LOC113715623	-3.65701268510875	piriformospora indica-insensitive protein 2-like
LOC113697976	-3.65170977931775	diacylglycerol O-acyltransferase 2-like
LOC113692453	-3.64401324052068	beta-galactosidase-like
LOC113698072	-3.64210421508536	brassinosteroid LRR receptor kinase-like
LOC113713830	-3.6418193322372	WAT1-related protein At4g15540-like isoform X1
LOC113697107	-3.63838322202141	aldehyde oxidase GLOX-like
LOC113728218	-3.63622783729906	NAC domain-containing protein 43 isoform X1
LOC113698414	-3.63589449138695	uncharacterized protein LOC113698414
LOC113715773	-3.63259879547395	MLP-like protein 34
LOC113732513	-3.62576626608286	annexin D3-like isoform X4
LOC113726693	-3.62477143246057	peroxidase 43-like
LOC113733343	-3.62095041954512	basic 7S globulin-like
LOC113727499	-3.61964965211873	OTU domain-containing protein DDB_G0284757-like isoform X3
LOC113708883	-3.61576618531864	LRR receptor-like serine/threonine-protein kinase RPK2
LOC113718845	-3.61159500692028	alpha-xylosidase 1-like
LOC113690572	-3.61104697321097	Unknown protein
LOC113713479	-3.60852674203514	protein ECERIFERUM 2-like
LOC113700875	-3.60779088748033	linoleate 13S-lipoxygenase 2-1, chloroplastic-like
LOC113726262	-3.60730777885674	endo-1,4-beta-xylanase 5-like
LOC113694314	-3.60412431725699	protein ABHD18-like
LOC113731119	-3.60388242630033	receptor kinase-like protein Xa21
LOC113694566	-3.60293514863399	nudix hydrolase 8-like
LOC113736313	-3.60127153748359	receptor like protein kinase S.2-like
LOC113727405	-3.59485010914148	uncharacterized protein LOC113727405
LOC113704497	-3.5883277231013	uncharacterized protein LOC113704497 isoform X2
LOC113707439	-3.5868527029173	LRR receptor-like serine/threonine-protein kinase ERECTA isoform X1
LOC113742161	-3.58376890929041	LOW QUALITY PROTEIN: ABC transporter G family member 11-like
LOC113706677	-3.5825258929872	probable WRKY transcription factor 40
LOC113741812	-3.58172304855075	root phototropism protein 3-like
LOC113719181	-3.57976875574205	probable inactive purple acid phosphatase 1 isoform X3
LOC113743213	-3.57773733304896	probable LRR receptor-like serine/threonine-protein kinase At1g56140 isoform X6
LOC113731154	-3.5766365690068	protein NUCLEAR FUSION DEFECTIVE 4-like
LOC113713838	-3.57573446666978	probable beta-D-xylosidase 7
LOC113742137	-3.57281541943997	chlorophyll a-b binding protein 4, chloroplastic-like isoform X2
LOC113703150	-3.57201375774605	UPF0481 protein At3g47200-like
LOC113740599	-3.56865018991035	transcription factor bHLH137 isoform X2
LOC113731052	-3.56447858147426	protein trichome birefringence-like 38
LOC113706467	-3.55849518884532	protein LURP-one-related 4-like isoform X2
LOC113740296	-3.55767875403487	cytosolic sulfotransferase 7-like
LOC113700598	-3.5572715922605	MDIS1-interacting receptor like kinase 2-like
LOC113739545	-3.55721150064107	subtilisin-like protease SBT1.5
LOC113688848	-3.55334981281559	(-)-germacrene D synthase-like
LOC113717245	-3.55231656782941	thioredoxin H2-like
LOC113691531	-3.55027772609098	probable serine incorporator isoform X2
LOC113709566	-3.549851103039	kinesin-like protein KIN-5D
LOC113699403	-3.54453578637431	fatty acid amide hydrolase-like isoform X2
LOC113695795	-3.53644051994835	uncharacterized protein LOC113695795
LOC113700161	-3.53130873106258	protein COBRA-like
LOC113714316	-3.52869983573306	allene oxide synthase-like
LOC113702372	-3.52072458651188	uncharacterized protein LOC113702372
LOC113709223	-3.51646682732488	aquaporin TIP1-3-like
LOC113741175	-3.51427918928422	CASP-like protein 1F1 isoform X2
LOC113742370	-3.51410132089777	kinesin-like protein KIN-13B
LOC113708085	-3.51041470705316	beta-galactosidase 8-like
LOC113692744	-3.50561072329052	VIN3-like protein 2
LOC113698403	-3.5029409731058	probable trehalose-phosphate phosphatase J
LOC113701744	-3.50269521856952	phosphatidylinositol 3,4,5-trisphosphate 3-phosphatase and protein-tyrosine-phosphatase PTEN2A-like
LOC113698406	-3.4977354573707	uncharacterized protein LOC113698406
LOC113719690	-3.49717240412046	probable RNA-dependent RNA polymerase 1 isoform X2
LOC113714649	-3.49625453193579	uncharacterized protein LOC113714649
LOC113740295	-3.49499360241788	chlorophyll a-b binding protein P4, chloroplastic-like isoform X2
LOC113734882	-3.49021895554216	phosphoenolpyruvate carboxylase kinase 2-like
LOC113694743	-3.48970801855522	probable LRR receptor-like serine/threonine-protein kinase At2g24230
LOC113698994	-3.48831674811003	protein CDI-like
LOC113687941	-3.48503857806422	protein STRUBBELIG-RECEPTOR FAMILY 3-like isoform X2
LOC113713409	-3.47824732091843	patatin-like protein 2
LOC113695365	-3.47761406834688	uncharacterized protein LOC113695365 isoform X1
LOC113709445	-3.47300545066461	uncharacterized protein LOC113709445
LOC113725699	-3.4669731055946	cytochrome P450 77A2-like
LOC113701795	-3.46533757950344	lysine-rich arabinogalactan protein 18-like
LOC113694330	-3.45868769038769	uncharacterized protein At4g15970-like
LOC113695267	-3.45529513018047	probable glycerol-3-phosphate dehydrogenase [NAD(+)
LOC113691844	-3.45493352092653	receptor-like protein kinase FERONIA
LOC113708319	-3.45469027612909	Unknown protein
LOC113696768	-3.44936727409368	L-type lectin-domain containing receptor kinase VIII.1
LOC113736241	-3.435644981373	UPF0481 protein At3g47200-like
LOC113705968	-3.42657565226796	cytosolic sulfotransferase 15-like
LOC113726602	-3.42631217608334	root phototropism protein 3-like isoform X2
LOC113697081	-3.42545282220714	Unknown protein
LOC113738278	-3.42037568330239	protein NETWORKED 1D-like
LOC113716791	-3.41979302252275	transcription factor BHLH089-like isoform X2
LOC113708905	-3.4170698807911	Unknown protein
LOC113695272	-3.41504397941737	type I inositol polyphosphate 5-phosphatase 8-like
LOC113731183	-3.41419040439444	aquaporin AQPAn.G-like
LOC113742829	-3.40483937719488	peptidyl-prolyl cis-trans isomerase CYP26-2, chloroplastic isoform X1
LOC113689468	-3.40185337770663	G-type lectin S-receptor-like serine/threonine-protein kinase At4g03230
LOC113688543	-3.40146768543355	phosphoenolpyruvate carboxylase-like
LOC113710985	-3.40062142877049	glutamyl-tRNA reductase 1, chloroplastic-like
LOC113692737	-3.4003041357473	mechanosensitive ion channel protein 10-like
LOC113690964	-3.39413772236783	interactor of constitutive active ROPs 1-like
LOC113739835	-3.38639104477317	cucumisin-like isoform X3
LOC113690559	-3.38619374514559	probable LRR receptor-like serine/threonine-protein kinase At1g07650 isoform X2
LOC113713445	-3.38607698904536	protein RADIALIS-like 3
LOC113731533	-3.38517153418725	LIM domain-containing protein WLIM1-like isoform X2
LOC113694603	-3.38480908843811	class V chitinase-like
LOC113741884	-3.38460205227181	auxin-induced protein 22A-like
LOC113692296	-3.38230640762107	Unknown protein
LOC113697476	-3.38158257241513	aspartic proteinase-like protein 2
LOC113713420	-3.3815224760965	inositol transporter 4-like
LOC113702056	-3.38084796996611	squalene monooxygenase-like isoform X2
LOC113702205	-3.3797173429271	nucleobase-ascorbate transporter 11-like
LOC113743367	-3.37713213380237	Unknown protein
LOC113714335	-3.37656599002357	receptor-like serine/threonine-protein kinase ALE2
LOC113695980	-3.37548373417242	VIN3-like protein 2
LOC113743591	-3.36836322113759	BTB/POZ domain-containing protein At3g22104-like isoform X2
LOC113741789	-3.36600203214912	ethylene-responsive transcription factor TINY-like
LOC113711488	-3.36345710819545	probable inactive receptor-like protein kinase At3g56050
LOC113726193	-3.3600545114846	receptor-like protein 51 isoform X2
LOC113698174	-3.35780458712173	filament-like plant protein 7
LOC113717384	-3.35743607908431	probable xyloglucan endotransglucosylase/hydrolase protein 27
LOC113693617	-3.3570235889353	stomatal closure-related actin-binding protein 3-like
LOC113743235	-3.35026544079256	probable leucine-rich repeat receptor-like serine/threonine-protein kinase At3g14840
LOC113701761	-3.34509756493045	uncharacterized protein LOC113701761
LOC113717108	-3.34387776307233	uncharacterized protein LOC113717108
LOC113730392	-3.34334025226035	BAHD acyltransferase DCR
LOC113701168	-3.34193657996188	probable serine/threonine-protein kinase PBL7 isoform X2
LOC113738771	-3.34012241545835	Unknown protein
LOC113699418	-3.33585265574638	subtilisin-like protease SBT3.9
LOC113742907	-3.33095962295947	tryptophan aminotransferase-related protein 2-like
LOC113715028	-3.3283255639255	uncharacterized protein LOC113715028
LOC113737773	-3.32574489265219	MDIS1-interacting receptor like kinase 2-like isoform X2
LOC113735101	-3.32560866978215	MDIS1-interacting receptor like kinase 2-like
LOC113690427	-3.32502253087744	probable leucine-rich repeat receptor-like serine/threonine-protein kinase At3g14840
LOC113712218	-3.32478584970486	LOW QUALITY PROTEIN: high mobility group B protein 9
LOC113732612	-3.32414136188841	uncharacterized protein LOC113732612
LOC113703561	-3.32198832318587	probable WRKY transcription factor 40
LOC113693799	-3.31848679015072	auxin transporter-like protein 2
LOC113695511	-3.31715613240464	protein trichome birefringence-like
LOC113690862	-3.31492791902141	uncharacterized protein LOC113690862
LOC113741993	-3.31432303653842	acid phosphatase 1-like
LOC113713566	-3.30987107560411	uncharacterized protein LOC113713566
LOC113730694	-3.3091145436643	pleiotropic drug resistance protein 2-like
LOC113727811	-3.30820457351671	LOW QUALITY PROTEIN: beta-galactosidase 8-like
LOC113704223	-3.30647155705992	IRK-interacting protein-like
LOC113730892	-3.29891335844635	sugar carrier protein C-like
LOC113735154	-3.29615204319536	UDP-glycosyltransferase 74E1-like
LOC113730520	-3.29451006888858	ACT domain-containing protein ACR9-like
LOC113697798	-3.29180264635576	probable receptor-like protein kinase At2g42960
LOC113703814	-3.28613051659552	probable carboxylesterase 120
LOC113696085	-3.2853984305552	magnesium-protoporphyrin IX monomethyl ester [oxidative
LOC113702194	-3.28351625805846	metal transporter Nramp5-like isoform X2
LOC113714835	-3.28195808456588	galacturonokinase-like isoform X2
LOC113727889	-3.28040477834286	pectin acetylesterase 12-like isoform X1
LOC113711809	-3.27945206651339	tryptophan aminotransferase-related protein 4-like
LOC113712441	-3.27701370074208	protein NPGR1-like
LOC113730666	-3.2759489040598	LOW QUALITY PROTEIN: protein PMR5-like
LOC113688257	-3.27267829313428	protochlorophyllide reductase, chloroplastic
LOC113700341	-3.265967324735	aspartyl protease family protein 1-like isoform X1
LOC113734154	-3.26231859265605	type IV inositol polyphosphate 5-phosphatase 7-like
LOC113737331	-3.25873641386191	probable carboxylesterase 12
LOC113712894	-3.25771784934276	uncharacterized protein LOC113712894
LOC113712883	-3.25576331954964	chlorophyll a-b binding protein CP26, chloroplastic
LOC113703643	-3.25531643614115	probable leucine-rich repeat receptor-like serine/threonine-protein kinase At3g14840 isoform X3
LOC113701544	-3.25205007821601	berberine bridge enzyme-like 28
LOC113712526	-3.24276990676564	cytochrome P450 81E8-like
LOC113695018	-3.24194085368489	protein STRICTOSIDINE SYNTHASE-LIKE 2-like isoform X2
LOC113730874	-3.24056626527822	uncharacterized protein LOC113730874
LOC113703868	-3.23906709206245	geraniol 8-hydroxylase-like
LOC113699224	-3.23621724920602	beta-galactosidase-like
LOC113716576	-3.23329518463584	transcription repressor MYB6-like
LOC113726968	-3.23318757276509	uncharacterized protein LOC113726968
LOC113699014	-3.23288244571291	myb-related protein 306-like
LOC113734844	-3.23247673923364	serine/threonine-protein kinase-like protein ACR4
LOC113722209	-3.23239746164155	uncharacterized protein LOC113722209
LOC113707331	-3.23041998529883	BURP domain protein RD22-like
LOC113724880	-3.22966462570761	protein IQ-DOMAIN 1-like
LOC113733308	-3.2263477769716	cytochrome b561 and DOMON domain-containing protein At3g61750 isoform X1
LOC113702208	-3.22548299636781	probable mannitol dehydrogenase
LOC113726304	-3.22436479061203	photosystem I subunit O-like
LOC113737071	-3.2182260236196	UDP-glycosyltransferase 92A1-like
LOC113731100	-3.21530521950739	receptor kinase-like protein Xa21
LOC113732323	-3.21464225780743	Unknown protein
LOC113739460	-3.21317571792486	ankyrin repeat-containing protein BDA1-like
LOC113725141	-3.20918148964251	21 kDa protein-like
LOC113733860	-3.20288867561686	uncharacterized protein LOC113733860 isoform X2
LOC113688094	-3.20043677631329	histone acetyltransferase KAT6A-like
LOC113713810	-3.19817370373326	protein NRT1/ PTR FAMILY 2.11-like
LOC113709633	-3.19758889101261	anthocyanidin 3-O-glucosyltransferase 2-like
LOC113688103	-3.19704750582485	fasciclin-like arabinogalactan protein 1
LOC113712268	-3.196990077149	LIM domain-containing protein WLIM1-like
LOC113741845	-3.19668567276039	transcription factor MYB4-like isoform X1
LOC113739943	-3.19512309799052	peptidyl-prolyl cis-trans isomerase CYP26-2, chloroplastic-like isoform X3
LOC113734199	-3.1940446500956	3-ketoacyl-CoA synthase 20-like
LOC113692157	-3.19332770917049	transcription factor DIVARICATA-like
LOC113716527	-3.1906802536165	transcription factor MYB3-like
LOC113739738	-3.19048410795685	tropinone reductase homolog At5g06060-like
LOC113690338	-3.189384409081	65-kDa microtubule-associated protein 1-like
LOC113732377	-3.18930382392674	serine carboxypeptidase-like 40
LOC113690342	-3.18485901826755	acidic endochitinase-like
LOC113707354	-3.18036562681291	EG45-like domain containing protein
LOC113732156	-3.17973168209365	uncharacterized protein LOC113732156
LOC113710161	-3.17939212813517	chlorophyll a-b binding protein of LHCII type 1-like
LOC113742748	-3.17699304884232	protein MANNAN SYNTHESIS-RELATED 2-like
LOC113743512	-3.17300649460577	receptor-like protein kinase HSL1
LOC113727794	-3.17140222867112	nicotianamine synthase-like
LOC113729851	-3.17094397944172	caffeic acid 3-O-methyltransferase-like
LOC113696174	-3.1697687253611	UDP-glycosyltransferase 86A1-like
LOC113716566	-3.16794948512672	probable transmembrane ascorbate ferrireductase 3
LOC113688990	-3.16375956871182	early nodulin-like protein 1
LOC113704351	-3.16143324481077	myosin-9-like isoform X2
LOC113700005	-3.1557775024868	metal transporter Nramp5-like isoform X2
LOC113736372	-3.1547960465909	UDP-glucuronate 4-epimerase 6-like
LOC113713340	-3.15340031502384	uncharacterized protein LOC113713340
LOC113695223	-3.15085404707725	macrophage migration inhibitory factor homolog
LOC113700982	-3.14686125887864	brassinosteroid LRR receptor kinase-like
LOC113695626	-3.14634209090845	transcription factor bHLH48-like
LOC113734815	-3.14354239363289	Unknown protein
LOC113743585	-3.14299534147805	uncharacterized protein LOC113743585
LOC113698393	-3.14217888809064	aldehyde dehydrogenase family 3 member F1 isoform X3
LOC113690714	-3.13684525926964	myb-like protein X
LOC113712807	-3.13507732685662	uncharacterized protein LOC113712807
LOC113738371	-3.13488131271077	non-specific lipid-transfer protein 1-like
LOC113691073	-3.13340620251803	phosphoenolpyruvate carboxylase
LOC113730168	-3.12964436826	LOW QUALITY PROTEIN: 21 kDa protein-like
LOC113731745	-3.1295733564086	transcription factor UNE10-like
LOC113701928	-3.12929601441794	vegetative cell wall protein gp1-like
LOC113702108	-3.12852508345897	serine carboxypeptidase-like 25
LOC113741287	-3.12344562460625	expansin-A10-like
LOC113696761	-3.12294696178267	magnesium-protoporphyrin IX monomethyl ester [oxidative
LOC113718781	-3.1182536335781	WAT1-related protein At3g28050-like isoform X2
LOC113698548	-3.11566145569222	anthocyanidin 3-O-glucosyltransferase 5-like
LOC113703844	-3.10507327073651	bark storage protein A-like
LOC113717823	-3.10399150475885	GDSL esterase/lipase At3g26430-like
LOC113711317	-3.1018912713276	protein PMR5-like isoform X2
LOC113732770	-3.09366139284621	sugar transporter ERD6-like 5 isoform X4
LOC113732084	-3.092533737355	uncharacterized protein LOC113732084 isoform X2
LOC113707863	-3.09134815941329	uncharacterized membrane protein At1g16860-like
LOC113718842	-3.08759508790626	uncharacterized protein LOC113718842
LOC113687882	-3.08716740521229	calcium-dependent protein kinase 2-like
LOC113739972	-3.08673963372507	ABC transporter G family member 11
LOC113691129	-3.08608572248985	protein RICE SALT SENSITIVE 3-like isoform X3
LOC113692063	-3.08463238060251	subtilisin-like protease SBT1.8
LOC113732940	-3.0813592892665	uncharacterized protein LOC113732940 isoform X2
LOC113726502	-3.07919560604872	uncharacterized protein LOC113726502
LOC113693969	-3.07815974031937	uncharacterized protein LOC113693969 isoform X3
LOC113711039	-3.07802444173834	glucuronoxylan 4-O-methyltransferase 3-like
LOC113688042	-3.07478320167695	uncharacterized protein LOC113688042
LOC113689008	-3.07290900981494	beta-glucosidase 18-like
LOC113743510	-3.07244552602436	probable serine/threonine-protein kinase PBL7
LOC113741739	-3.06971144368404	LOW QUALITY PROTEIN: protein FAF-like, chloroplastic
LOC113689973	-3.06543953153746	uncharacterized protein LOC113689973
LOC113706530	-3.06527177543089	phosphoglycerate mutase-like protein AT74H
LOC113737901	-3.0617517436974	protein FANTASTIC FOUR 3
LOC113690404	-3.05197685789326	protein STRUBBELIG-RECEPTOR FAMILY 3-like isoform X2
LOC113714586	-3.04848622597931	linoleate 13S-lipoxygenase 2-1, chloroplastic-like
LOC113736621	-3.04734066106791	serine/threonine-protein kinase-like protein ACR4 isoform X1
LOC113725188	-3.04512641747759	hexose carrier protein HEX6-like isoform X2
LOC113712331	-3.04044160840481	root phototropism protein 2-like
LOC113731548	-3.03917813962843	probable LRR receptor-like serine/threonine-protein kinase At1g06840 isoform X2
LOC113718814	-3.03637770889824	protein PLANT CADMIUM RESISTANCE 2-like
LOC113735164	-3.03590581962859	berberine bridge enzyme-like 18
LOC113742971	-3.03565121227	transcription factor bHLH87
LOC113732374	-3.03484395267057	serine carboxypeptidase-like 40
LOC113711904	-3.03174274592847	protein RADIALIS-like 3
LOC113711424	-3.02814049332903	BAG family molecular chaperone regulator 4-like
LOC113700105	-3.02680857998769	very-long-chain (3R)-3-hydroxyacyl-CoA dehydratase PASTICCINO 2-like
LOC113735193	-3.02456290456936	pentatricopeptide repeat-containing protein At3g20730-like isoform X1
LOC113710984	-3.02222080824109	photosystem I reaction center subunit N, chloroplastic-like
LOC113738781	-3.0221953685771	G-type lectin S-receptor-like serine/threonine-protein kinase At4g03230
LOC113698508	-3.02107697196028	nucleobase-ascorbate transporter 11-like
LOC113713882	-3.01962483002712	probable LRR receptor-like serine/threonine-protein kinase At5g48740
LOC113719151	-3.01607219203292	Unknown protein
LOC113736638	-3.01546035763162	UDP-glycosyltransferase 75C1-like
LOC113715615	-3.01541945492185	65-kDa microtubule-associated protein 8-like isoform X2
LOC113711078	-3.01352327982741	vacuolar cation/proton exchanger 3-like isoform X1
LOC113716867	-3.01218024825543	nucleobase-ascorbate transporter 7-like
LOC113719652	-3.00771493820386	uncharacterized protein LOC113719652
LOC113724816	-3.0059254967883	LOW QUALITY PROTEIN: caffeic acid 3-O-methyltransferase-like
LOC113729588	-3.00108060124293	uncharacterized protein LOC113729588 isoform X2
LOC113725500	-2.99769921386901	ACT domain-containing protein ACR9-like
LOC113719695	-2.99512295447732	probable RNA-dependent RNA polymerase 1
LOC113712530	-2.99459691732004	deSI-like protein At4g17486
LOC113725883	-2.9930801223379	G-type lectin S-receptor-like serine/threonine-protein kinase At1g11410 isoform X2
LOC113702997	-2.99192425066342	F-box protein At2g26850-like
LOC113707413	-2.98204796468081	probable cyclic nucleotide-gated ion channel 14
LOC113712120	-2.98164275069927	protein WALLS ARE THIN 1-like
LOC113714757	-2.97885123942817	photosystem I reaction center subunit N, chloroplastic-like
LOC113692309	-2.97679367107151	uncharacterized protein LOC113692309
LOC113710204	-2.97666116560636	protein IQ-DOMAIN 1-like
LOC113711719	-2.97650654325739	abscisic stress-ripening protein 2-like
LOC113743233	-2.97409535136985	probable leucine-rich repeat receptor-like serine/threonine-protein kinase At3g14840
LOC113716387	-2.97348584786029	uncharacterized protein LOC113716387 isoform X2
LOC113715531	-2.9723097130416	lysine histidine transporter-like 6
LOC113734305	-2.97091932006289	COP1-interacting protein 7
LOC113736429	-2.96878148271286	glycine-rich RNA-binding protein 2-like
LOC113742190	-2.96645416018565	uncharacterized protein LOC113742190
LOC113718473	-2.96277622733519	leucine-rich repeat extensin-like protein 3
LOC113695797	-2.96098906362595	expansin-A6-like
LOC113718547	-2.95876445136664	receptor kinase-like protein Xa21
LOC113730250	-2.95452665443057	RING-H2 finger protein ATL74-like
LOC113713055	-2.95332870014051	fimbrin-2
LOC113740609	-2.95237440610921	phospholipase A1-IIdelta-like isoform X2
LOC113703586	-2.95052976388162	GDSL esterase/lipase At4g10955-like
LOC113736914	-2.94834247659028	uncharacterized protein LOC113736914
LOC113735085	-2.94485850921602	uncharacterized protein LOC113735085
LOC113690001	-2.94404851488694	uncharacterized protein LOC113690001
LOC113732904	-2.94240070717266	putative pectinesterase/pectinesterase inhibitor 22
LOC113717763	-2.93879177547109	transmembrane 9 superfamily member 2-like isoform X1
LOC113740003	-2.93493179452825	uncharacterized protein LOC113740003
LOC113732372	-2.93435097949617	uncharacterized protein LOC113732372
LOC113718625	-2.93047227766731	uncharacterized protein LOC113718625
LOC113694237	-2.92979868553665	Unknown protein
LOC113709139	-2.92908254138224	beta-Amyrin Synthase 2-like
LOC113710365	-2.92754120724376	uncharacterized protein LOC113710365
LOC113712474	-2.92028464539879	L-ascorbate oxidase homolog
LOC113717169	-2.9202511069695	receptor protein kinase-like protein ZAR1
LOC113713331	-2.91994571597209	F-box protein FBW2-like
LOC113690873	-2.91971166671727	choline transporter protein 1-like isoform X2
LOC113735141	-2.91849603683211	formin-like protein 2
LOC113713402	-2.91740620954036	chloroplast envelope quinone oxidoreductase homolog
LOC113717816	-2.91356743019192	probable galactinol--sucrose galactosyltransferase 2
LOC113743756	-2.91250153708866	TPR repeat-containing thioredoxin TTL1 isoform X2
LOC113698814	-2.90279257324279	G-type lectin S-receptor-like serine/threonine-protein kinase At1g11300 isoform X2
LOC113702310	-2.90264906206199	basic endochitinase-like
LOC113713604	-2.89987767001444	uncharacterized protein LOC113713604
LOC113706865	-2.89979952043996	chitinase-like protein 2
LOC113702701	-2.89799247863486	viridiflorene synthase-like
LOC113708533	-2.89603442022796	pentatricopeptide repeat-containing protein At4g16390, chloroplastic
LOC113733022	-2.89544398646661	probable receptor-like protein kinase At2g42960 isoform X1
LOC113717178	-2.89168684413769	interactor of constitutive active ROPs 2, chloroplastic-like
LOC113687806	-2.8895266688664	calcium-binding protein PBP1-like
LOC113692599	-2.88615875354108	NDR1/HIN1-like protein 1
LOC113688287	-2.88516480271198	LOW QUALITY PROTEIN: microtubule-associated protein TORTIFOLIA1-like
LOC113704872	-2.88464877169028	UPF0481 protein At3g47200-like
LOC113708510	-2.88118662052022	7-methylxanthosine synthase 1
LOC113717936	-2.87994106685582	UDP-glycosyltransferase 83A1-like
LOC113704294	-2.87906650502285	3-ketoacyl-CoA synthase 11-like
LOC113695074	-2.87800218010311	ras-related protein RABE1a-like
LOC113707670	-2.87269692732723	transcription termination factor MTEF1, chloroplastic-like
LOC113704206	-2.86799170285454	monoacylglycerol lipase ABHD6
LOC113737189	-2.86791812358068	UDP-glycosyltransferase 74E1-like
LOC113699289	-2.86747453224484	uncharacterized protein LOC113699289
LOC113698592	-2.86729733769711	uncharacterized protein LOC113698592
LOC113687853	-2.86441920550434	putative late blight resistance protein homolog R1A-3
LOC113704898	-2.85814590077687	protein FAF-like, chloroplastic
LOC113706843	-2.85658586613931	acyl-lipid (9-3)-desaturase-like
LOC113738092	-2.85617925433656	putative E3 ubiquitin-protein ligase LIN-1 isoform X2
LOC113707610	-2.8557930911614	jacalin-related lectin 5-like
LOC113690090	-2.85491376809371	squamosa promoter-binding-like protein 3
LOC113700426	-2.8544702296553	L-ascorbate oxidase-like
LOC113706770	-2.85436412918096	O-glucosyltransferase rumi homolog isoform X2
LOC113716755	-2.85010639352061	uncharacterized protein LOC113716755 isoform X5
LOC113701116	-2.8499672793241	citrate-binding protein-like
LOC113708914	-2.84796037522322	uncharacterized protein LOC113708914 isoform X2
LOC113736579	-2.84775566123316	glucosamine 6-phosphate N-acetyltransferase-like
LOC113705308	-2.84423085732284	receptor protein kinase TMK1-like
LOC113728141	-2.8382562147966	probable membrane-associated kinase regulator 6
LOC113715777	-2.83719776392168	cell number regulator 9-like isoform X2
LOC113712102	-2.83615465742051	uncharacterized protein LOC113712102
LOC113716137	-2.83439524974081	acetyl-coenzyme A synthetase, chloroplastic/glyoxysomal-like
LOC113702684	-2.83437665307194	tubulin beta chain-like
LOC113701952	-2.83355754951359	xyloglucan galactosyltransferase XLT2-like
LOC113739623	-2.83210036203816	uncharacterized protein LOC113739623
LOC113702672	-2.83199447154672	LRR receptor-like serine/threonine-protein kinase ERECTA
LOC113691399	-2.8305343273782	uncharacterized protein At3g28850-like
LOC113734310	-2.82929185119217	long-chain-alcohol oxidase FAO1-like
LOC113702068	-2.82734747021235	protein COBRA-like
LOC113717902	-2.82726163305422	uncharacterized protein LOC113717902 isoform X2
LOC113725602	-2.82701183430635	c-Myc-binding protein homolog
LOC113713088	-2.82337875371064	uncharacterized protein LOC113713088 isoform X2
LOC113734102	-2.82225835393219	probably inactive leucine-rich repeat receptor-like protein kinase IMK2
LOC113706331	-2.81918823325681	adenine phosphoribosyltransferase 5-like
LOC113698772	-2.81660600952205	transcription factor HBI1 isoform X2
LOC113728187	-2.81636391786377	vegetative cell wall protein gp1-like
LOC113731624	-2.81617767984325	protein EXORDIUM-like 2
LOC113705554	-2.81440856133403	photosystem I subunit O-like
LOC113732991	-2.81419956931312	uncharacterized protein LOC113732991
LOC113688109	-2.81372659988605	chlorophyll a-b binding protein 13, chloroplastic
LOC113733055	-2.81221589135331	germin-like protein 5-1
LOC113702336	-2.8116070417135	LOW QUALITY PROTEIN: 3-epi-6-deoxocathasterone 23-monooxygenase CYP90C1-like
LOC113687863	-2.80982332843094	glutamate receptor 2.8-like
LOC113719171	-2.80746042778353	BTB/POZ domain-containing protein At1g67900-like
LOC113703556	-2.80719887254103	aspartyl protease family protein At5g10770-like
LOC113733362	-2.80353286725153	uncharacterized protein LOC113733362
LOC113730683	-2.80069723141957	hippocampus abundant transcript-like protein 1
LOC113716803	-2.80064623487833	AP2/ERF and B3 domain-containing transcription factor RAV1-like
LOC113714330	-2.79465234962552	Unknown protein
LOC113739975	-2.789033781125	magnesium protoporphyrin IX methyltransferase, chloroplastic-like
LOC113688865	-2.78877065588873	Unknown protein
LOC113701783	-2.78582289064706	phospholipase A1-Igamma3, chloroplastic-like
LOC113716869	-2.78441716147149	LOW QUALITY PROTEIN: BTB/POZ domain-containing protein At1g67900-like
LOC113705259	-2.78142618656456	3-ketoacyl-CoA synthase 11-like
LOC113688348	-2.78133658909287	LRR receptor-like serine/threonine-protein kinase GSO2 isoform X1
LOC113702161	-2.77913930524664	non-specific phospholipase C2-like
LOC113696987	-2.77822461753592	organic cation/carnitine transporter 7-like
LOC113715094	-2.77558154453014	uncharacterized protein LOC113715094 isoform X3
LOC113738654	-2.77251623928139	uncharacterized protein LOC113738654
LOC113710336	-2.77215307308885	oligopeptide transporter 3-like
LOC113719005	-2.77210131910554	uncharacterized protein LOC113719005 isoform X4
LOC113727644	-2.7720865079646	Unknown protein
LOC113693626	-2.77159210488865	probable inactive receptor kinase At2g26730
LOC113706856	-2.76750726195263	alpha,alpha-trehalose-phosphate synthase [UDP-forming
LOC113697416	-2.7672986396018	Unknown protein
LOC113717798	-2.7659653426931	uncharacterized protein LOC113717798
LOC113736648	-2.76039228091755	tetrapyrrole-binding protein, chloroplastic-like
LOC113691841	-2.75982366416873	probable LRR receptor-like serine/threonine-protein kinase At1g06840 isoform X3
LOC113697206	-2.75667213435761	putative GPI-anchored protein pfl2
LOC113702242	-2.75567222335441	very-long-chain (3R)-3-hydroxyacyl-CoA dehydratase PASTICCINO 2-like
LOC113705563	-2.75262783356015	F-box protein At2g27310-like isoform X1
LOC113707321	-2.74976956924942	geraniol 8-hydroxylase-like
LOC113741456	-2.7462096499986	uncharacterized protein LOC113741456 isoform X2
LOC113703301	-2.74495603931632	uncharacterized protein LOC113703301
LOC113728885	-2.74167870816479	uncharacterized protein LOC113728885
LOC113730849	-2.73981300024246	thioredoxin-like protein CXXS1
LOC113708113	-2.73266377372975	disease resistance protein RPM1-like
LOC113741991	-2.73089467107792	palmitoyl-monogalactosyldiacylglycerol delta-7 desaturase, chloroplastic-like
LOC113706358	-2.73058887893379	pleiotropic drug resistance protein 2-like
LOC113709298	-2.7283526115572	uncharacterized protein ycf39-like
LOC113728846	-2.72675435992945	beta-glucosidase 13-like
LOC113710376	-2.72592718011714	leucine-rich repeat receptor-like serine/threonine-protein kinase BAM3
LOC113731758	-2.72319633428	malate dehydrogenase, cytoplasmic-like
LOC113688081	-2.72118381362595	fasciclin-like arabinogalactan protein 2
LOC113741332	-2.71910929686795	tropinone reductase homolog At5g06060-like
LOC113734016	-2.71865376133123	probable 1-deoxy-D-xylulose-5-phosphate synthase, chloroplastic
LOC113712377	-2.7176223764801	thaumatin-like protein 1b
LOC113702668	-2.71697552419707	bidirectional sugar transporter SWEET3b-like
LOC113740231	-2.70862854536515	uncharacterized protein At5g01610-like
LOC113700163	-2.70567641086996	WD repeat-containing protein 44-like
LOC113712791	-2.70455750199756	uncharacterized protein LOC113712791
LOC113731180	-2.70435989973942	snakin-2
LOC113703384	-2.70159146010717	chitinase-like protein 2
LOC113726126	-2.69638958685153	hexose carrier protein HEX6-like
LOC113688289	-2.68907770153146	O-acyltransferase WSD1-like
LOC113725206	-2.68683898744912	LOW QUALITY PROTEIN: ethylene-responsive transcription factor ERF106
LOC113711850	-2.68196817281599	protein NRT1/ PTR FAMILY 2.11-like
LOC113698563	-2.67992846701449	mannan endo-1,4-beta-mannosidase 7
LOC113733163	-2.67978127533506	AT-hook motif nuclear-localized protein 9-like
LOC113710396	-2.6787662515597	LRR receptor-like serine/threonine-protein kinase RPK2
LOC113695229	-2.67791576946532	putative disease resistance protein At1g50180
LOC113736192	-2.67773645856392	plastid-lipid-associated protein 6, chloroplastic-like
LOC113735105	-2.67733771907295	putative disease resistance protein RGA3
LOC113725625	-2.67677495887357	basic leucine zipper 34-like
LOC113697080	-2.6737251349984	galacturonokinase-like isoform X2
LOC113704314	-2.67301605458645	CASP-like protein 4D1
LOC113731035	-2.67182460224204	hexose carrier protein HEX6-like
LOC113712668	-2.6701714317067	filament-like plant protein 4
LOC113724949	-2.66789031719811	Unknown protein
LOC113701757	-2.66573536136765	metal transporter Nramp3-like
LOC113713811	-2.66566776275653	RING-H2 finger protein ATL54-like
LOC113728544	-2.66559537212861	LOW QUALITY PROTEIN: uncharacterized protein LOC113728544
LOC113738129	-2.66432600277589	acyl-CoA-binding domain-containing protein 6
LOC113731820	-2.66379425475096	uncharacterized protein LOC113731820 isoform X1
LOC113692972	-2.66254475909558	protein TSS-like
LOC113703879	-2.6622531789179	uncharacterized protein LOC113703879
LOC113703429	-2.66048771921755	phosphoglycerate mutase-like protein AT74H
LOC113692903	-2.65967337748865	RING-H2 finger protein ATL52-like
LOC113743625	-2.65784917491032	uncharacterized protein LOC113743625
LOC113706489	-2.65653261716327	transcription factor MYB4-like
LOC113698968	-2.65638215384182	3-epi-6-deoxocathasterone 23-monooxygenase CYP90C1-like
LOC113702176	-2.65535068239513	uncharacterized protein LOC113702176 isoform X6
LOC113732116	-2.65425455060771	glutathione transferase GST 23-like
LOC113716953	-2.6526250869641	protein PLANT CADMIUM RESISTANCE 2-like
LOC113706951	-2.65073859057469	probable plastid-lipid-associated protein 12, chloroplastic isoform X2
LOC113726023	-2.64811097026783	uncharacterized protein LOC113726023
LOC113714677	-2.64783879945188	glutamyl-tRNA reductase 1, chloroplastic-like
LOC113707700	-2.64625060132768	transmembrane protein 56-like
LOC113704043	-2.64608610774342	dynamin-related protein 1E-like isoform X2
LOC113712373	-2.64352833821797	uncharacterized protein LOC113712373 isoform X2
LOC113732028	-2.64291443574982	rac-like GTP-binding protein 5
LOC113741418	-2.63956321685038	inactive protein kinase SELMODRAFT_444075-like
LOC113738835	-2.63861869003198	protein NRT1/ PTR FAMILY 2.11-like
LOC113719197	-2.63653919035136	protein NRT1/ PTR FAMILY 2.13-like
LOC113719654	-2.63279570891767	probable 6-phosphogluconolactonase 1 isoform X3
LOC113737831	-2.63242573205439	disease resistance protein RPS2-like
LOC113714434	-2.63167999150735	LIM domain-containing protein WLIM1-like
LOC113701265	-2.63012658401794	probable indole-3-acetic acid-amido synthetase GH3.1
LOC113714740	-2.62880830426241	7-deoxyloganetin glucosyltransferase-like
LOC113690083	-2.62670590348352	receptor-like protein kinase THESEUS 1 isoform X3
LOC113706908	-2.62507516771311	cellulose synthase-like protein D3
LOC113727594	-2.6133054970415	heavy metal-associated isoprenylated plant protein 34-like
LOC113707718	-2.61285390496678	cationic amino acid transporter 1-like
LOC113701805	-2.61263973240742	fatty acid amide hydrolase-like isoform X2
LOC113695179	-2.61236284961788	transcription factor DIVARICATA-like
LOC113727020	-2.61139301527626	probable xyloglucan endotransglucosylase/hydrolase protein 30
LOC113704392	-2.60981549884715	BTB/POZ domain-containing protein At1g63850-like
LOC113731643	-2.60930154146423	root phototropism protein 3-like isoform X2
LOC113732766	-2.60800576474446	oleoyl-acyl carrier protein thioesterase, chloroplastic-like
LOC113709552	-2.60748920868964	chitinase 2-like
LOC113712002	-2.60685880827215	indole-3-acetic acid-amido synthetase GH3.17-like
LOC113733861	-2.60508868458895	cell wall / vacuolar inhibitor of fructosidase 1-like
LOC113743692	-2.60433409518592	uncharacterized protein LOC113743692
LOC113734162	-2.60432127020482	protein NETWORKED 1A
LOC113696138	-2.60228112456237	LEAF RUST 10 DISEASE-RESISTANCE LOCUS RECEPTOR-LIKE PROTEIN KINASE-like 2.3
LOC113708716	-2.60060760157467	oligopeptide transporter 3-like
LOC113700516	-2.60038398124011	protein YLS3-like isoform X2
LOC113701013	-2.59946570120644	putative receptor protein kinase ZmPK1
LOC113734866	-2.59330221969723	tetrapyrrole-binding protein, chloroplastic-like
LOC113731439	-2.59229627058985	caffeoyl-CoA O-methyltransferase 5
LOC113712654	-2.59166671429576	RING-H2 finger protein ATL54-like
LOC113739619	-2.58819418263211	root phototropism protein 3-like
LOC113725726	-2.58778987045905	bark storage protein A-like
LOC113743230	-2.58510531624146	zinc finger CCCH domain-containing protein 2-like
LOC113701094	-2.58275113115219	cytochrome P450 CYP736A12-like
LOC113693992	-2.5820108134056	delta(12)-fatty-acid desaturase FAD2-like
LOC113698874	-2.5769269174892	WAT1-related protein At3g28050-like isoform X4
LOC113731843	-2.5748654344476	thaumatin-like protein
LOC113735011	-2.5744060494637	L-type lectin-domain containing receptor kinase IV.1-like
LOC113691634	-2.57423663846363	glucan endo-1,3-beta-glucosidase, acidic-like
LOC113702765	-2.57077057371304	TMV resistance protein N-like isoform X1
LOC113726042	-2.56902523442202	squamosa promoter-binding protein 1
LOC113726478	-2.56800339280403	cinnamyl alcohol dehydrogenase 1-like
LOC113741385	-2.56548196570838	uncharacterized protein LOC113741385
LOC113688595	-2.56294285171371	protein RICE SALT SENSITIVE 3-like isoform X3
LOC113705519	-2.55651381616378	E3 ubiquitin-protein ligase RHA1B-like
LOC113716326	-2.55585688795632	alpha-1,4 glucan phosphorylase L-2 isozyme, chloroplastic/amyloplastic-like isoform X2
LOC113741490	-2.5535963501034	zinc finger protein CONSTANS-LIKE 16-like
LOC113743360	-2.5528896773296	protochlorophyllide reductase-like
LOC113742725	-2.55261726094189	uncharacterized protein At5g01610-like isoform X1
LOC113703310	-2.55203203182536	replication protein A 70 kDa DNA-binding subunit B-like
LOC113703841	-2.5518311114536	uncharacterized protein LOC113703841 isoform X1
LOC113690918	-2.55055283827878	Unknown protein
LOC113709690	-2.54918708951046	uncharacterized protein LOC113709690
LOC113731485	-2.54576784111612	alpha-L-fucosidase 2-like
LOC113692069	-2.54521635803072	myb-related protein 306-like
LOC113725115	-2.54313759858271	uncharacterized protein LOC113725115
LOC113725523	-2.53995180808232	beta-glucuronosyltransferase GlcAT14A-like
LOC113706734	-2.53921884826488	GDSL esterase/lipase At4g10955-like
LOC113728703	-2.5386100683533	very-long-chain (3R)-3-hydroxyacyl-CoA dehydratase 2-like isoform X1
LOC113741680	-2.53813841031499	Unknown protein
LOC113695292	-2.53811052871807	phospholipase A2-alpha-like
LOC113689747	-2.53686634435771	probable serine/threonine-protein kinase PBL7
LOC113708898	-2.53655774825991	uncharacterized protein ycf39-like
LOC113688851	-2.53474884375475	protochlorophyllide reductase-like
LOC113693127	-2.5319338781625	putative UPF0481 protein At3g02645
LOC113691745	-2.53192734646382	probable glycosyltransferase At5g11130
LOC113716764	-2.52979871048022	receptor-like protein kinase FERONIA
LOC113741950	-2.52969933667771	protein NRT1/ PTR FAMILY 4.6-like isoform X1
LOC113728213	-2.52770850724632	CBL-interacting serine/threonine-protein kinase 9 isoform X3
LOC113690215	-2.52629323328271	uncharacterized protein LOC113690215
LOC113689802	-2.52528440153425	uncharacterized protein LOC113689802 isoform X1
LOC113710321	-2.52520976909329	uncharacterized protein LOC113710321
LOC113706912	-2.52355510880763	uncharacterized protein LOC113706912 isoform X2
LOC113724924	-2.51924276123856	probable inactive receptor kinase At4g23740
LOC113727442	-2.51778564946377	UDP-glycosyltransferase 83A1-like
LOC113693596	-2.51525844695508	organic cation/carnitine transporter 7-like
LOC113695435	-2.51437912842303	uncharacterized protein LOC113695435
LOC113706211	-2.51388683565631	protein NRT1/ PTR FAMILY 2.7-like
LOC113692025	-2.51151634297951	protein STRICTOSIDINE SYNTHASE-LIKE 10-like
LOC113710411	-2.51151130453157	probable LRR receptor-like serine/threonine-protein kinase At4g20940 isoform X3
LOC113728055	-2.51134173663803	AT-hook motif nuclear-localized protein 9-like
LOC113700194	-2.50611287938031	carbonic anhydrase 2-like
LOC113742035	-2.50560873464578	G-type lectin S-receptor-like serine/threonine-protein kinase RKS1 isoform X1
LOC113695830	-2.50427782598336	uncharacterized protein LOC113695830
LOC113736193	-2.50196674695433	long-chain-alcohol oxidase FAO1-like
LOC113742401	-2.50034401124579	LOW QUALITY PROTEIN: uncharacterized protein C26H5.07c-like
LOC113703872	-2.49403667078125	alpha,alpha-trehalose-phosphate synthase [UDP-forming
LOC113718834	-2.49370971694324	uncharacterized protein LOC113718834
LOC113697678	-2.49339598821111	putative disease resistance protein RGA3
LOC113702058	-2.49079888882474	protein NSP-INTERACTING KINASE 1-like isoform X1
LOC113698557	-2.4893738292593	protein COBRA-like
LOC113743517	-2.48882601830711	probable serine/threonine-protein kinase At1g54610
LOC113709403	-2.48867369846617	UPF0329 protein ECU05_1680/ECU11_0050-like
LOC113691736	-2.48759972875265	uncharacterized protein LOC113691736 isoform X2
LOC113714324	-2.48580808853496	tubulin beta-1 chain
LOC113701018	-2.48577824504542	uncharacterized protein LOC113701018
LOC113726713	-2.48489295081188	uncharacterized protein LOC113726713
LOC113743429	-2.48210548020657	uncharacterized protein LOC113743429
LOC113711082	-2.48084398519138	uncharacterized protein LOC113711082
LOC113703746	-2.47419717838618	uncharacterized protein LOC113703746
LOC113702665	-2.4715338948095	caffeic acid 3-O-methyltransferase-like
LOC113699175	-2.47063169394476	protein ABA DEFICIENT 4, chloroplastic-like
LOC113691905	-2.4700520558498	magnesium-chelatase subunit ChlH, chloroplastic
LOC113695169	-2.46705800197559	heptahelical transmembrane protein 1-like
LOC113730925	-2.46633950930115	protein LIGHT-DEPENDENT SHORT HYPOCOTYLS 6-like
LOC113713346	-2.46548808964755	patatin-like protein 2
LOC113706700	-2.46532985440747	putative disease resistance protein At1g50180
LOC113738715	-2.46326060462288	auxin-induced protein 22A-like
LOC113724941	-2.46190213917545	probable membrane-associated kinase regulator 6
LOC113697757	-2.45972602454871	zinc finger protein 4-like
LOC113714521	-2.45956931187226	uncharacterized protein LOC113714521 isoform X2
LOC113691483	-2.45952421151292	WAT1-related protein At5g07050-like
LOC113709817	-2.45354478862243	protein argonaute 2-like
LOC113692352	-2.45344834507394	uncharacterized protein LOC113692352
LOC113712888	-2.44761120624882	ATP sulfurylase 2-like
LOC113732452	-2.44236051948109	probable amidase At4g34880
LOC113706389	-2.44054574925211	probable carotenoid cleavage dioxygenase 4, chloroplastic
LOC113692285	-2.43916673363998	uncharacterized protein LOC113692285
LOC113743757	-2.43859196921399	cyclin-U1-1-like
LOC113718708	-2.43759280491494	acyl carrier protein 1, chloroplastic-like isoform X2
LOC113711020	-2.43543691885234	F-box protein FBW2-like
LOC113730369	-2.43483650905255	cytochrome P450 90A1-like
LOC113716511	-2.43425282269841	Unknown protein
LOC113734351	-2.43274836527038	uncharacterized protein LOC113734351 isoform X2
LOC113709623	-2.43194656586875	BTB/POZ domain-containing protein At5g60050-like
LOC113692474	-2.42976636197345	transcription factor bHLH48-like
LOC113737112	-2.42952074068468	uncharacterized protein LOC113737112
LOC113716736	-2.42785395422948	uncharacterized protein LOC113716736
LOC113716433	-2.42490805804072	transcription factor MYB124
LOC113715085	-2.4237937949732	fructose-1,6-bisphosphatase, cytosolic
LOC113724179	-2.42229607012647	Unknown protein
LOC113703528	-2.42105775886211	aluminum-activated malate transporter 12-like
LOC113738135	-2.41966542897944	CASP-like protein 1
LOC113693633	-2.41916434827486	lycopene epsilon cyclase, chloroplastic-like isoform X2
LOC113726116	-2.41802651249335	protein IQ-DOMAIN 1-like
LOC113698430	-2.41504046024976	xyloglucan galactosyltransferase XLT2-like
LOC113702441	-2.4096265743962	alpha/beta hydrolase domain-containing protein 17C-like
LOC113697157	-2.40936202536496	protein ABHD18-like
LOC113706946	-2.39963820553429	glycine-rich domain-containing protein 1-like
LOC113712181	-2.39938061853704	tubulin alpha-4 chain-like
LOC113712183	-2.39673756445398	uncharacterized protein LOC113712183 isoform X1
LOC113703483	-2.39611261462567	O-glucosyltransferase rumi homolog isoform X2
LOC113734477	-2.39404296754001	glutaredoxin-C13-like
LOC113697548	-2.39327811198759	uncharacterized protein LOC113697548
LOC113708647	-2.39249530315909	two-component response regulator-like PRR37 isoform X1
LOC113726223	-2.39026754423958	uncharacterized protein LOC113726223
LOC113734776	-2.38932087087258	probable methyltransferase PMT19
LOC113730100	-2.38655883614015	probable methyltransferase PMT15
LOC113703753	-2.38241044596326	uncharacterized protein LOC113703753
LOC113705238	-2.38182828777769	aspartyl protease family protein At5g10770-like
LOC113726489	-2.38127656788635	alpha-L-fucosidase 2
LOC113716989	-2.37815332209672	putative U-box domain-containing protein 42
LOC113740555	-2.37788646962009	uncharacterized protein LOC113740555
LOC113705770	-2.37716299782229	rho GTPase-activating protein 5-like
LOC113727012	-2.37713009965985	UDP-D-apiose/UDP-D-xylose synthase 2
LOC113701251	-2.37660450651576	protein indeterminate-domain 16-like isoform X1
LOC113716396	-2.37515766149603	LEAF RUST 10 DISEASE-RESISTANCE LOCUS RECEPTOR-LIKE PROTEIN KINASE-like 1.5
LOC113730684	-2.37412341085884	hippocampus abundant transcript-like protein 1
LOC113725198	-2.37273141180799	acid phosphatase 1
LOC113741841	-2.37115280496527	heparanase-like protein 2
LOC113713274	-2.36814962878702	receptor protein kinase CLAVATA1-like
LOC113742766	-2.3672682821894	uncharacterized protein LOC113742766 isoform X2
LOC113708520	-2.36590258905872	arogenate dehydratase/prephenate dehydratase 1, chloroplastic-like isoform X1
LOC113691849	-2.36136289242964	protein NLP1-like isoform X1
LOC113701106	-2.36061103905327	uncharacterized protein LOC113701106
LOC113699973	-2.35581006838663	O-fucosyltransferase 31-like
LOC113713721	-2.35520502732123	protein DETOXIFICATION 26-like isoform X2
LOC113734194	-2.3541912037425	uncharacterized protein LOC113734194
LOC113731043	-2.35417960929718	GDSL esterase/lipase At1g28580-like
LOC113706450	-2.3536010226901	uncharacterized protein LOC113706450
LOC113717624	-2.35353568115103	zinc finger protein BRUTUS-like
LOC113698108	-2.35255659705855	cysteine-rich receptor-like protein kinase 42 isoform X1
LOC113735061	-2.35213081695686	uncharacterized protein LOC113735061
LOC113696695	-2.35149480784233	alpha-L-arabinofuranosidase 1-like isoform X2
LOC113706710	-2.34783426186338	G-type lectin S-receptor-like serine/threonine-protein kinase At1g11300 isoform X2
LOC113690806	-2.34261524533221	LOW QUALITY PROTEIN: microtubule-associated protein TORTIFOLIA1-like
LOC113729299	-2.34236400468975	zinc transporter 1-like
LOC113717176	-2.34211596438426	MLP-like protein 34
LOC113699115	-2.34122885260882	magnesium-chelatase subunit ChlI, chloroplastic-like
LOC113706503	-2.33983758195618	homeobox protein knotted-1-like 2
LOC113692029	-2.33909871948925	monogalactosyldiacylglycerol synthase 2, chloroplastic-like
LOC113740154	-2.33862090113584	uncharacterized protein LOC113740154 isoform X3
LOC113698706	-2.3353245699011	uncharacterized protein LOC113698706
LOC113734545	-2.33530162924842	probable metal-nicotianamine transporter YSL6 isoform X2
LOC113711917	-2.33341592890864	bidirectional sugar transporter SWEET1-like
LOC113726994	-2.33272228883684	uncharacterized protein LOC113726994 isoform X1
LOC113742108	-2.33138908136145	uncharacterized protein LOC113742108
LOC113693132	-2.3309252357499	putative UPF0481 protein At3g02645
LOC113689915	-2.330493266294	stromal cell-derived factor 2-like protein isoform X2
LOC113736242	-2.33013560745609	probable folate-biopterin transporter 9, chloroplastic isoform X2
LOC113714561	-2.32979401011376	squalene monooxygenase-like
LOC113714809	-2.32547290567116	NAC transcription factor 29-like
LOC113704175	-2.32470802432547	glycerol-3-phosphate acyltransferase, chloroplastic-like isoform X2
LOC113696013	-2.32447621870484	guanylate kinase 2-like isoform X3
LOC113743529	-2.32329366191328	uncharacterized protein LOC113743529
LOC113716578	-2.32294148649953	putative 1-phosphatidylinositol-3-phosphate 5-kinase FAB1C
LOC113716742	-2.32276323290918	uncharacterized protein LOC113716742
LOC113725632	-2.3216940786572	uncharacterized protein LOC113725632
LOC113741404	-2.32165643838999	putative UPF0481 protein At3g02645
LOC113730896	-2.32034163796649	LOW QUALITY PROTEIN: sugar carrier protein C-like
LOC113727819	-2.31711822291976	uncharacterized protein LOC113727819
LOC113726048	-2.31337996691122	receptor-like protein 4 isoform X2
LOC113736636	-2.31334124496825	disease resistance protein RGA2-like
LOC113693711	-2.31302459325768	auxin response factor 19-like isoform X2
LOC113717382	-2.31263172515433	probable alpha,alpha-trehalose-phosphate synthase [UDP-forming
LOC113736275	-2.31201335645354	uncharacterized protein LOC113736275
LOC113710741	-2.31198010569768	tubulin beta chain
LOC113724542	-2.31193498023606	uncharacterized protein LOC113724542
LOC113717932	-2.30933632679866	zinc finger protein CONSTANS-LIKE 16-like
LOC113711610	-2.30841072944881	protein LIGHT-DEPENDENT SHORT HYPOCOTYLS 6-like
LOC113692761	-2.30813312021359	AUGMIN subunit 8-like
LOC113731639	-2.30796987751106	uncharacterized protein LOC113731639
LOC113688572	-2.30725949809536	1-aminocyclopropane-1-carboxylate oxidase 1-like
LOC113699064	-2.30660169135282	monooxygenase 2-like
LOC113704147	-2.30291215330701	aspartyl protease family protein At5g10770-like
LOC113727875	-2.29976128700991	Unknown protein
LOC113708170	-2.29717059807637	putative E3 ubiquitin-protein ligase LIN
LOC113701085	-2.29647851879856	AAA-ATPase At3g50940-like
LOC113739645	-2.29534393684618	uncharacterized protein LOC113739645 isoform X3
LOC113733998	-2.2951954119408	CASP-like protein 1
LOC113730588	-2.29501682282615	uncharacterized protein LOC113730588 isoform X2
LOC113732457	-2.29484136807705	probable amidase At4g34880
LOC113727666	-2.29468478494479	GDSL esterase/lipase At5g03980-like
LOC113725536	-2.29415622199799	caffeoylshikimate esterase-like
LOC113717163	-2.29396845965709	serine carboxypeptidase-like 50
LOC113740459	-2.29261565566938	putative receptor-like protein kinase At1g80870
LOC113718067	-2.29125179935643	pectinesterase inhibitor 6-like
LOC113704035	-2.29003482283887	cytochrome P450 711A1-like isoform X2
LOC113734643	-2.28494255741342	uncharacterized protein LOC113734643
LOC113727735	-2.2838208843814	F-box/LRR-repeat protein 3-like isoform X2
LOC113707353	-2.28363638031007	probable receptor-like protein kinase At1g80640
LOC113704235	-2.28343547906237	uncharacterized protein LOC113704235
LOC113696355	-2.28274137471486	uncharacterized protein LOC113696355
LOC113728229	-2.27764337712021	protein CURVATURE THYLAKOID 1B, chloroplastic
LOC113726184	-2.27688214438689	probable LRR receptor-like serine/threonine-protein kinase At3g47570
LOC113696993	-2.27682278847807	auxin response factor 19-like isoform X2
LOC113711156	-2.27541200023198	patatin-like protein 2
LOC113715551	-2.27317102250749	putative late blight resistance protein homolog R1A-3
LOC113701327	-2.27310173646413	probable hexokinase-like 2 protein isoform X1
LOC113739917	-2.27195485001936	protein KINESIN LIGHT CHAIN-RELATED 3-like
LOC113696335	-2.27056805336653	LRR receptor-like serine/threonine-protein kinase ERECTA
LOC113700162	-2.2701978458607	cytochrome P450 85A1-like
LOC113733368	-2.26945535075793	3-ketoacyl-CoA synthase 1-like
LOC113719669	-2.26928533401522	transmembrane 9 superfamily member 2-like isoform X3
LOC113732733	-2.26866830149024	GDSL esterase/lipase 2-like
LOC113716935	-2.2671802538238	intracellular ribonuclease LX-like
LOC113739740	-2.26690666917111	tropinone reductase homolog At5g06060-like
LOC113696970	-2.26344533847968	LOW QUALITY PROTEIN: lycopene epsilon cyclase, chloroplastic-like
LOC113713314	-2.26245333689304	deSI-like protein At4g17486
LOC113710395	-2.26066778260946	G-type lectin S-receptor-like serine/threonine-protein kinase At1g11330 isoform X1
LOC113733970	-2.25941478521571	protein RALF-like 33
LOC113690967	-2.25471303113095	Unknown protein
LOC113698468	-2.25409249998475	protein CELLULOSE SYNTHASE INTERACTIVE 1-like
LOC113707866	-2.25401089918729	bifunctional dihydrofolate reductase-thymidylate synthase-like isoform X4
LOC113731735	-2.25276128950626	probable 2-oxoglutarate-dependent dioxygenase AOP1 isoform X1
LOC113733317	-2.25149429929879	aspartyl protease family protein 2-like
LOC113694841	-2.25148038681604	magnesium-chelatase subunit ChlH, chloroplastic-like isoform X2
LOC113710273	-2.24669623597572	glucan endo-1,3-beta-glucosidase 1-like
LOC113719586	-2.2455460964126	uncharacterized protein LOC113719586 isoform X2
LOC113739848	-2.24247709925274	uncharacterized protein LOC113739848
LOC113705344	-2.24163121795627	sulfite exporter TauE/SafE family protein 3-like
LOC113717959	-2.24135058277207	transmembrane protein 53-like
LOC113700139	-2.23945937740418	diacylglycerol O-acyltransferase 2D-like
LOC113724845	-2.23840770505245	Unknown protein
LOC113705258	-2.22887436736772	myosin-11-like isoform X2
LOC113725910	-2.22871603112453	molybdopterin biosynthesis protein CNX1-like
LOC113688302	-2.22654140001294	aspartyl protease family protein At5g10770-like
LOC113725197	-2.2223418842556	putative kinase-like protein TMKL1
LOC113732340	-2.21808828194607	protein RETICULATA-RELATED 4, chloroplastic-like isoform X2
LOC113689851	-2.21752225639858	calcium-dependent protein kinase 2-like
LOC113715174	-2.217333289141	putative UDP-glucuronate:xylan alpha-glucuronosyltransferase 3
LOC113725202	-2.21671136299371	WD repeat-containing protein WRAP73
LOC113702491	-2.20842656105798	bifunctional nuclease 2-like
LOC113712788	-2.20764629083921	fructose-1,6-bisphosphatase, cytosolic-like
LOC113740462	-2.20745022290917	rust resistance kinase Lr10-like
LOC113737147	-2.20433450392949	uncharacterized protein LOC113737147
LOC113716754	-2.20234146593332	probable galactinol--sucrose galactosyltransferase 2
LOC113696218	-2.20098447215215	uncharacterized protein LOC113696218
LOC113706205	-2.20030038456759	uncharacterized protein LOC113706205
LOC113742703	-2.19928613156669	transcription factor ICE1-like
LOC113703519	-2.19530155407031	putative receptor-like protein kinase At3g47110
LOC113738154	-2.19491169298127	probable 1-deoxy-D-xylulose-5-phosphate synthase, chloroplastic
LOC113731236	-2.19306809044972	purple acid phosphatase 2
LOC113734473	-2.1915723502072	probable sucrose-phosphate synthase 2 isoform X1
LOC113699136	-2.19046887766378	glycine-rich domain-containing protein 1-like
LOC113697523	-2.1881039758803	phosphoinositide phospholipase C 2-like isoform X1
LOC113692672	-2.1834303578301	Unknown protein
LOC113716310	-2.18134595638125	chaperonin 60 subunit beta 4, chloroplastic isoform X1
LOC113738134	-2.18115404286708	CASP-like protein 1E2
LOC113694112	-2.17962799958694	photosystem II 5 kDa protein, chloroplastic-like
LOC113690692	-2.17778886622211	probable amino acid permease 7
LOC113727681	-2.17731179394352	heparan-alpha-glucosaminide N-acetyltransferase-like
LOC113743310	-2.17483501137497	putative disease resistance protein RGA3
LOC113730226	-2.17357423298201	serine/threonine-protein kinase AtPK2/AtPK19-like
LOC113728209	-2.17281650485672	uncharacterized protein LOC113728209
LOC113687901	-2.16957246979574	glucan endo-1,3-beta-glucosidase 12
LOC113726667	-2.16948949766355	chlorophyll a-b binding protein CP24 10A, chloroplastic
LOC113710424	-2.16815963936677	1-aminocyclopropane-1-carboxylate oxidase-like
LOC113741534	-2.1678274731484	uncharacterized protein LOC113741534
LOC113692869	-2.16780088021044	mechanosensitive ion channel protein 10-like isoform X3
LOC113711053	-2.16664561532146	ammonium transporter 1 member 3-like
LOC113743471	-2.16526165571757	chlorophyll a-b binding protein 36, chloroplastic
LOC113711081	-2.16403937252438	tubby-like F-box protein 5
LOC113731060	-2.16284626002179	probable LRR receptor-like serine/threonine-protein kinase At3g47570 isoform X2
LOC113714652	-2.16256603803757	MDIS1-interacting receptor like kinase 2-like
LOC113688307	-2.16201622294123	Unknown protein
LOC113738029	-2.16180567490812	uncharacterized protein LOC113738029 isoform X2
LOC113717233	-2.16015661239449	zinc finger protein BRUTUS-like isoform X2
LOC113701469	-2.16014619885301	FCS-Like Zinc finger 5-like
LOC113731692	-2.1600655121792	chlorophyll a-b binding protein CP24 10A, chloroplastic-like
LOC113695126	-2.16001312881865	serine carboxypeptidase II-2-like isoform X2
LOC113688260	-2.15979595395382	probable protein phosphatase 2C 52
LOC113704237	-2.15868784740169	kinesin-like protein KIN-UB isoform X1
LOC113726885	-2.15864063512678	putative phytosulfokines 6
LOC113728537	-2.15777622739454	uncharacterized protein LOC113728537
LOC113743546	-2.15768254170507	uncharacterized protein LOC113743546
LOC113702347	-2.15581951977349	leucine-rich repeat receptor-like serine/threonine-protein kinase BAM1
LOC113708079	-2.15290001291488	farnesyl pyrophosphate synthase 1 isoform X2
LOC113688770	-2.15120362084071	uncharacterized protein LOC113688770
LOC113709767	-2.14662896434231	photosystem I reaction center subunit III, chloroplastic-like
LOC113725225	-2.14642379873056	non-specific lipid transfer protein GPI-anchored 2-like
LOC113739947	-2.14495731751961	rac-like GTP-binding protein ARAC8 isoform X1
LOC113708630	-2.14452489634685	ABC transporter C family member 12-like isoform X1
LOC113687915	-2.1440353318891	peptidyl-prolyl cis-trans isomerase FKBP16-1, chloroplastic-like isoform X3
LOC113712091	-2.14387651861446	tubulin beta-1 chain-like
LOC113697312	-2.1434745605441	photosystem II 5 kDa protein, chloroplastic-like
LOC113730977	-2.14189958833464	uncharacterized protein LOC113730977
LOC113691309	-2.14096086224782	probable F-box protein At2g36090
LOC113730555	-2.14057756703086	uncharacterized protein LOC113730555 isoform X2
LOC113740577	-2.14056419213196	inactive protein kinase SELMODRAFT_444075-like
LOC113695988	-2.14003403035885	putative elongation factor TypA-like SVR3, chloroplastic isoform X1
LOC113689797	-2.13486049797035	uncharacterized protein LOC113689797
LOC113697555	-2.13480222853222	glutathione hydrolase 3 isoform X2
LOC113698787	-2.13454571986607	protein DETOXIFICATION 45, chloroplastic-like
LOC113712339	-2.13452165619017	probable LRR receptor-like serine/threonine-protein kinase At1g06840 isoform X2
LOC113730004	-2.13444671924942	uncharacterized protein PAM68-like
LOC113707819	-2.13435465110437	tubulin beta chain
LOC113708747	-2.13417734409834	receptor-like protein CLAVATA2
LOC113710937	-2.13241612470635	uncharacterized protein LOC113710937
LOC113706896	-2.13128351436509	uncharacterized protein LOC113706896
LOC113693855	-2.13127107781986	UDP-glucuronate 4-epimerase 1-like
LOC113695559	-2.12811961281042	ABC transporter B family member 1
LOC113733394	-2.12555923972407	uncharacterized protein LOC113733394
LOC113718795	-2.12433205255026	transcription factor MYB3-like
LOC113702463	-2.12220362717548	3-ketodihydrosphingosine reductase isoform X1
LOC113703602	-2.11803785426474	uncharacterized protein LOC113703602
LOC113724972	-2.11775052796366	Unknown protein
LOC113687964	-2.11672454910494	uncharacterized protein LOC113687964
LOC113698494	-2.11607979985091	serine carboxypeptidase-like 7
LOC113694063	-2.11604582786898	sodium/pyruvate cotransporter BASS2, chloroplastic-like
LOC113725278	-2.11214721047847	RING-H2 finger protein ATL74-like
LOC113735194	-2.11100679581199	guanine nucleotide-binding protein subunit gamma 2-like
LOC113703695	-2.10871555982663	acyl-lipid (9-3)-desaturase-like
LOC113734093	-2.10856005205395	glucose-1-phosphate adenylyltransferase large subunit 3, chloroplastic/amyloplastic-like
LOC113721321	-2.10681594932517	protein EARLY FLOWERING 4-like
LOC113738697	-2.10563926323323	putative UPF0481 protein At3g02645
LOC113708693	-2.10382709385443	187-kDa microtubule-associated protein AIR9
LOC113731226	-2.10044371151164	kinesin-like protein KIN-7D, mitochondrial
LOC113691034	-2.09913999928293	long-chain-alcohol O-fatty-acyltransferase-like
LOC113729839	-2.09833968691982	UNC93-like protein 1 isoform X1
LOC113689822	-2.09463625622291	chlorophyll a-b binding protein 36, chloroplastic
LOC113740420	-2.09118730884841	uncharacterized protein LOC113740420
LOC113699753	-2.08949421485	Unknown protein
LOC113734216	-2.08917202931617	auxin-responsive protein IAA14-like
LOC113697980	-2.08708408896152	protein DETOXIFICATION 27-like
LOC113726064	-2.08615760859953	uncharacterized protein LOC113726064 isoform X3
LOC113689716	-2.08534678811922	uncharacterized protein LOC113689716
LOC113694584	-2.08514287547902	protein RETICULATA-RELATED 1, chloroplastic-like isoform X2
LOC113699446	-2.084914705072	uncharacterized protein LOC113699446
LOC113727162	-2.08297017879877	uncharacterized protein LOC113727162
LOC113728163	-2.08023489469997	putative glucose-6-phosphate 1-epimerase
LOC113715606	-2.07961427454284	HIPL1 protein-like isoform X2
LOC113717773	-2.07899169124	protein NRT1/ PTR FAMILY 4.6-like
LOC113734917	-2.07893192948536	beta-glucosidase 11-like isoform X3
LOC113730847	-2.07789464490054	sulfite exporter TauE/SafE family protein 2-like
LOC113698431	-2.07785387588081	xyloglucan galactosyltransferase XLT2-like
LOC113703044	-2.07591660119083	probable methyltransferase PMT14
LOC113727528	-2.07353133485149	GDSL esterase/lipase 2-like
LOC113704149	-2.06769378402518	E3 ubiquitin-protein ligase RHA1B-like
LOC113736364	-2.06687766328032	Unknown protein
LOC113736612	-2.06669657029872	uncharacterized protein LOC113736612
LOC113717219	-2.06438674675657	myb family transcription factor PHL8-like isoform X3
LOC113692763	-2.06429107677445	guanylate kinase 2-like isoform X1
LOC113730631	-2.06221883142709	omega-3 fatty acid desaturase, endoplasmic reticulum-like
LOC113703642	-2.06195241010099	scarecrow-like protein 27
LOC113695479	-2.06117323131031	zinc finger protein 8-like
LOC113714437	-2.05680633243828	LOW QUALITY PROTEIN: jacalin-related lectin 3-like
LOC113688301	-2.05430071402496	cysteine-rich receptor-like protein kinase 25 isoform X2
LOC113687924	-2.05348684922426	protochlorophyllide-dependent translocon component 52, chloroplastic-like
LOC113732250	-2.0522585514537	LOW QUALITY PROTEIN: cellulose synthase A catalytic subunit 3 [UDP-forming
LOC113706760	-2.0521395821601	cellulose synthase A catalytic subunit 1 [UDP-forming
LOC113703662	-2.04710190861509	alkane hydroxylase MAH1-like
LOC113706716	-2.04707588532648	UDP-D-apiose/UDP-D-xylose synthase 2
LOC113697518	-2.04694182246579	transcription repressor MYB5-like isoform X2
LOC113716936	-2.04596620406439	IAA-amino acid hydrolase ILR1-like 2
LOC113714509	-2.04260731456206	glucose-6-phosphate isomerase, cytosolic
LOC113691939	-2.04247338220984	probable transcription factor At5g61620
LOC113697250	-2.04135890965907	UDP-glucuronate 4-epimerase 1-like
LOC113707019	-2.0401621787623	U-box domain-containing protein 4-like
LOC113695640	-2.03720024648517	flavonol synthase/flavanone 3-hydroxylase-like
LOC113718948	-2.03716223955067	GDSL esterase/lipase At3g26430-like
LOC113707447	-2.03680054389223	pleiotropic drug resistance protein 1-like
LOC113690933	-2.03576118085313	protein NUCLEAR FUSION DEFECTIVE 4-like
LOC113729980	-2.03521742715129	probable membrane-associated kinase regulator 6
LOC113713517	-2.03356070629029	protein SPA, chloroplastic-like
LOC113731629	-2.03281766478195	2-carboxy-1,4-naphthoquinone phytyltransferase, chloroplastic-like isoform X2
LOC113690657	-2.03072981608844	kinesin-like protein KIN-14N
LOC113708754	-2.03038262720709	uncharacterized protein LOC113708754
LOC113739100	-2.0302902767427	putative UPF0481 protein At3g02645
LOC113693805	-2.02958169132341	lysosomal Pro-X carboxypeptidase-like isoform X1
LOC113728535	-2.02886511954504	uncharacterized protein LOC113728535
LOC113719591	-2.02262732287829	cysteine-rich receptor-like protein kinase 3 isoform X2
LOC113738216	-2.02106446613228	glucose-1-phosphate adenylyltransferase large subunit 3, chloroplastic/amyloplastic-like
LOC113713598	-2.02044109153718	uncharacterized protein LOC113713598
LOC113740569	-2.01755134451492	probable metal-nicotianamine transporter YSL7
LOC113736827	-2.01684835813422	L-type lectin-domain containing receptor kinase IV.1-like
LOC113690794	-2.01530981115434	putative disease resistance protein RGA3
LOC113691904	-2.01495612184594	myb-related protein 306-like
LOC113732799	-2.01299066986865	heavy metal-associated isoprenylated plant protein 34-like
LOC113697029	-2.01291220424946	sugar transport protein 14-like
LOC113708709	-2.01179482363937	Unknown protein
LOC113736792	-2.01038642532784	putative disease resistance protein RGA3
LOC113731539	-2.00829102531323	root phototropism protein 2-like
LOC113687920	-2.00578357289107	acetylserotonin O-methyltransferase-like isoform X2
LOC113727726	-2.00335527522635	endoglucanase 25-like
LOC113698064	-2.00274348312326	putative disease resistance protein RGA4 isoform X3
LOC113725018	-2.00122176795246	pectin acetylesterase 9-like isoform X4
LOC113725863	-1.99989172386856	thioredoxin-like protein CXXS1
LOC113714894	-1.99900517653491	serine/threonine-protein kinase tricorner-like isoform X1
LOC113718757	-1.99745912015334	histidine kinase 4-like
LOC113695727	-1.99655733384904	receptor-like serine/threonine-protein kinase ALE2
LOC113705478	-1.99568342699166	probable methyltransferase PMT20
LOC113701283	-1.99534860415882	G-type lectin S-receptor-like serine/threonine-protein kinase LECRK1
LOC113726940	-1.9917467613407	ribose-phosphate pyrophosphokinase 1-like
LOC113704858	-1.99115193207228	putative receptor-like protein kinase At3g47110
LOC113706507	-1.99102832034814	arogenate dehydratase/prephenate dehydratase 6, chloroplastic-like
LOC113712825	-1.98873733720335	BRI1 kinase inhibitor 1-like
LOC113734282	-1.98847002493808	probable inorganic phosphate transporter 1-3
LOC113732782	-1.98701541598551	GDSL esterase/lipase At1g54790-like
LOC113732515	-1.98593096397386	annexin D3-like
LOC113704011	-1.98320795788802	bifunctional UDP-glucose 4-epimerase and UDP-xylose 4-epimerase 1-like
LOC113736056	-1.98126627337357	uncharacterized protein LOC113736056
LOC113692779	-1.9784565191372	nitrate regulatory gene2 protein-like
LOC113742535	-1.97488721580737	uncharacterized protein LOC113742535 isoform X2
LOC113729555	-1.97394248442103	copper transporter 1-like
LOC113695882	-1.97384850268265	putative serine/threonine-protein kinase-like protein CCR3
LOC113708689	-1.97362803306229	U-box domain-containing protein 33-like
LOC113708853	-1.97331338477624	aquaporin PIP2-7
LOC113710048	-1.97300766801558	LOW QUALITY PROTEIN: BAG family molecular chaperone regulator 3-like
LOC113729892	-1.97269044987869	molybdate-anion transporter-like
LOC113709296	-1.97193424118102	uncharacterized protein YKR070W-like isoform X2
LOC113712647	-1.97149229289349	uncharacterized protein LOC113712647
LOC113732850	-1.97051320195654	psbP domain-containing protein 7, chloroplastic-like isoform X2
LOC113735726	-1.96739095157103	protein trichome birefringence-like 6
LOC113742146	-1.96510674061291	geranylgeranyl diphosphate reductase, chloroplastic
LOC113707216	-1.96448953060043	uncharacterized protein LOC113707216
LOC113698571	-1.9641787969848	FCS-Like Zinc finger 5-like
LOC113697382	-1.96411449935002	putative cysteine-rich receptor-like protein kinase 16
LOC113714201	-1.96372754674187	LOW QUALITY PROTEIN: CLIP-associated protein-like
LOC113730638	-1.96103069902091	LOW QUALITY PROTEIN: internal alternative NAD(P)H-ubiquinone oxidoreductase A1, mitochondrial-like
LOC113704304	-1.96032029461436	protein LOL1 isoform X2
LOC113710600	-1.95905328584788	uncharacterized protein LOC113710600
LOC113690483	-1.95852699583462	Unknown protein
LOC113697083	-1.95751905589503	inactive protein kinase SELMODRAFT_444075-like
LOC113725859	-1.95536391850264	cysteine-rich receptor-like protein kinase 25
LOC113732773	-1.95386030163405	protein FANTASTIC FOUR 1
LOC113731209	-1.95358575221429	kinesin-like protein KIN-7E
LOC113742826	-1.94920727179396	beta-galactosidase 10
LOC113731447	-1.94870666707023	CBS domain-containing protein CBSX2, chloroplastic-like isoform X2
LOC113687900	-1.94853109937931	premnaspirodiene oxygenase-like
LOC113729356	-1.94674111924883	LOW QUALITY PROTEIN: protein PLASTID TRANSCRIPTIONALLY ACTIVE 16, chloroplastic-like
LOC113726066	-1.94643513462254	receptor protein kinase TMK1-like
LOC113712481	-1.94605624413411	protein SPA, chloroplastic-like
LOC113732738	-1.94317543560459	uncharacterized protein LOC113732738 isoform X2
LOC113714752	-1.94297829871158	filament-like plant protein 4
LOC113693943	-1.94267893066557	sulfoquinovosyl transferase SQD2-like
LOC113709125	-1.94174705582026	protein SRG1-like
LOC113711005	-1.94003291684959	probable pectin methyltransferase QUA2
LOC113709253	-1.93926453343299	transcription termination factor MTEF1, chloroplastic-like
LOC113692681	-1.93753947078313	protein trichome birefringence-like
LOC113736608	-1.93498802310533	divinyl chlorophyllide a 8-vinyl-reductase, chloroplastic isoform X2
LOC113741817	-1.93399384615559	photosystem I reaction center subunit VI, chloroplastic-like
LOC113727558	-1.93396929716176	major antigen-like
LOC113729214	-1.93298824051496	ubiquitin fusion degradation protein 1 homolog
LOC113714873	-1.93271350037764	uncharacterized protein LOC113714873
LOC113709230	-1.93213547940392	very-long-chain (3R)-3-hydroxyacyl-CoA dehydratase 2-like isoform X3
LOC113717618	-1.93127720631241	transcription termination factor MTERF2, chloroplastic-like
LOC113743663	-1.93067593676724	uncharacterized protein LOC113743663
LOC113739786	-1.92848405831371	methylecgonone reductase-like isoform X2
LOC113692569	-1.9250591825147	Unknown protein
LOC113708913	-1.92344220025208	lysM domain-containing GPI-anchored protein 2-like
LOC113715071	-1.9209950336723	uncharacterized protein LOC113715071 isoform X2
LOC113707875	-1.9196449963007	Unknown protein
LOC113725809	-1.91836579967541	auxin response factor 18
LOC113714495	-1.91759727551725	protein NRT1/ PTR FAMILY 5.10-like isoform X2
LOC113691999	-1.91738746131994	uncharacterized protein LOC113691999
LOC113730431	-1.91695517978424	protein DA1-related 2 isoform X1
LOC113710616	-1.91563144510106	Unknown protein
LOC113731628	-1.91106056544372	ABC transporter G family member 11-like
LOC113698593	-1.91098194746271	Unknown protein
LOC113702247	-1.90689813426159	uncharacterized protein LOC113702247 isoform X1
LOC113702825	-1.90495127542483	protein NRT1/ PTR FAMILY 1.2-like
LOC113738429	-1.90292237912968	LOW QUALITY PROTEIN: transcription factor MYBS1-like
LOC113698002	-1.90194616725258	aldose 1-epimerase-like
LOC113701065	-1.89979507909693	pentatricopeptide repeat-containing protein At4g39620, chloroplastic-like
LOC113742611	-1.89807715141152	protein NRT1/ PTR FAMILY 1.2-like
LOC113730058	-1.89786004347929	pectin acetylesterase 9-like isoform X3
LOC113703367	-1.89545671214564	protein LURP-one-related 4-like
LOC113727576	-1.89379457873657	uncharacterized protein LOC113727576 isoform X3
LOC113706893	-1.8928280106441	RING-H2 finger protein ATL57-like
LOC113725803	-1.8925134334891	E3 ubiquitin-protein ligase WAV3 isoform X1
LOC113699912	-1.89238905374477	putative disease resistance protein RGA4
LOC113688460	-1.89174364826279	beta-glucuronosyltransferase GlcAT14B-like
LOC113709458	-1.89133620828327	uncharacterized GPI-anchored protein At1g61900-like
LOC113708499	-1.89072477401135	protein SRG1-like isoform X2
LOC113733285	-1.88922953327421	protein trichome birefringence-like 25 isoform X2
LOC113710291	-1.88751337058896	two-component response regulator-like PRR37 isoform X2
LOC113697169	-1.88738712460346	fructose-1,6-bisphosphatase, chloroplastic-like
LOC113692703	-1.88731652968576	leucine-rich repeat receptor-like protein kinase TDR
LOC113726731	-1.88386738854649	uncharacterized protein LOC113726731
LOC113732371	-1.88312384588375	protein TSS-like isoform X1
LOC113730642	-1.88305118563828	uncharacterized protein LOC113730642 isoform X2
LOC113725320	-1.8827021242823	wound-induced protein 1-like
LOC113740183	-1.88247248875048	tryptophan aminotransferase-related protein 2-like
LOC113717227	-1.88179096502497	remorin 1.4 isoform X2
LOC113711021	-1.88164789346994	probable LRR receptor-like serine/threonine-protein kinase At3g47570 isoform X1
LOC113690231	-1.88127682043755	uncharacterized protein LOC113690231 isoform X2
LOC113713398	-1.87907392659926	uncharacterized oxidoreductase At4g09670-like
LOC113701491	-1.87875309714601	protein CELLULOSE SYNTHASE INTERACTIVE 1-like
LOC113733054	-1.87846264835456	uncharacterized protein LOC113733054 isoform X1
LOC113725023	-1.87776833898343	tubulin beta-1 chain
LOC113699212	-1.87700546873032	uncharacterized protein LOC113699212
LOC113733363	-1.87597246041725	CBL-interacting serine/threonine-protein kinase 9-like isoform X3
LOC113713184	-1.87499766173347	sugar transport protein 5-like
LOC113695521	-1.87464927691254	Unknown protein
LOC113698724	-1.87006183446218	U-box domain-containing protein 5 isoform X1
LOC113718870	-1.86797116502089	transcription repressor MYB6-like
LOC113707377	-1.86472124713453	protein LOL1-like isoform X2
LOC113739495	-1.86399193591713	LOW QUALITY PROTEIN: protein RETICULATA-RELATED 4, chloroplastic-like
LOC113687777	-1.86373285139025	uncharacterized protein LOC113687777
LOC113699920	-1.86354898455548	indole-3-acetic acid-amido synthetase GH3.3-like
LOC113697576	-1.86322849841595	protochlorophyllide-dependent translocon component 52, chloroplastic-like
LOC113698176	-1.86284119131983	protein YLS3-like isoform X2
LOC113707657	-1.86208689457714	receptor-like serine/threonine-protein kinase NCRK isoform X2
LOC113733997	-1.8618561922064	CASP-like protein 1E2
LOC113690417	-1.85946724130951	Unknown protein
LOC113730628	-1.85802499539635	uncharacterized protein LOC113730628
LOC113700446	-1.85587786531317	cyclin-dependent kinase inhibitor 1 isoform X1
LOC113719212	-1.85287433923054	probable inactive purple acid phosphatase 1 isoform X2
LOC113702500	-1.85204305484011	Unknown protein
LOC113727161	-1.85109624603282	protein TSS-like isoform X1
LOC113717313	-1.84963295529951	protein NRT1/ PTR FAMILY 2.13-like
LOC113718937	-1.84814446801729	histone-lysine N-methyltransferase, H3 lysine-9 specific SUVH4-like
LOC113740087	-1.84376342879704	LOW QUALITY PROTEIN: palmitoyl-monogalactosyldiacylglycerol delta-7 desaturase, chloroplastic-like
LOC113692801	-1.84235165442162	mucin-3A-like
LOC113728176	-1.84073470680873	protein trichome birefringence-like 25 isoform X2
LOC113732568	-1.84071483290371	chloroplast envelope quinone oxidoreductase homolog
LOC113710329	-1.83705266623984	aquaporin PIP2-4-like
LOC113712753	-1.8367567295977	transcription factor TCP23-like
LOC113713524	-1.83628690450661	putative ER lumen protein-retaining receptor C28H8.4
LOC113699420	-1.83368876506681	protein PIN-LIKES 3-like isoform X3
LOC113741254	-1.83244662630159	uncharacterized protein LOC113741254 isoform X4
LOC113735217	-1.83194562863552	uncharacterized protein LOC113735217
LOC113731690	-1.83023575489177	uncharacterized protein C24B11.05-like
LOC113736221	-1.83003285397472	uncharacterized protein LOC113736221
LOC113739785	-1.82877799468685	probable arabinose 5-phosphate isomerase
LOC113734237	-1.82840870286938	probable cellulose synthase A catalytic subunit 2 [UDP-forming
LOC113709680	-1.82722624920397	aminomethyltransferase, mitochondrial
LOC113688263	-1.8269824900308	zinc finger CCCH domain-containing protein 18-like
LOC113737991	-1.82688123556012	F-box/LRR-repeat protein At3g26922-like isoform X3
LOC113703724	-1.82674338434318	psbP domain-containing protein 5, chloroplastic isoform X2
LOC113698881	-1.82549813392083	leucine-rich repeat receptor-like serine/threonine-protein kinase BAM1
LOC113732905	-1.82501183663406	F-box/LRR-repeat protein 3-like isoform X2
LOC113699382	-1.82483667128605	protein IQ-DOMAIN 31-like
LOC113719046	-1.82440639697171	putative late blight resistance protein homolog R1A-4
LOC113714773	-1.82360329097184	beta-D-glucosyl crocetin beta-1,6-glucosyltransferase-like
LOC113733284	-1.82278803577949	protein ENHANCED DISEASE RESISTANCE 4-like
LOC113711043	-1.82256167977014	geranylgeranyl pyrophosphate synthase, chloroplastic-like
LOC113738115	-1.82192910837553	probable protein phosphatase 2C 40
LOC113736387	-1.82158723322922	purple acid phosphatase 23-like isoform X2
LOC113713392	-1.82058502756023	UV-B-induced protein At3g17800, chloroplastic
LOC113701333	-1.82056164078685	ras-related protein Rab7-like isoform X2
LOC113712121	-1.81838892811118	wall-associated receptor kinase 2-like
LOC113688846	-1.81822813780417	chaperone protein dnaJ C76, chloroplastic-like
LOC113687957	-1.81443572965973	transcription factor PHYTOCHROME INTERACTING FACTOR-LIKE 13-like isoform X4
LOC113712193	-1.81384044689081	thylakoid lumenal 29 kDa protein, chloroplastic-like isoform X2
LOC113695072	-1.81379759012614	phosphatidylinositol 4-phosphate 5-kinase 9 isoform X1
LOC113710251	-1.8120579603481	flavonol sulfotransferase-like
LOC113717345	-1.80687873815	probable 6-phosphogluconolactonase 1 isoform X2
LOC113725945	-1.80648340317017	uncharacterized protein LOC113725945 isoform X2
LOC113730381	-1.80503293208327	uncharacterized protein LOC113730381
LOC113710237	-1.80471975561272	methylsterol monooxygenase 2-2 isoform X1
LOC113694288	-1.80464530641622	protein IQ-DOMAIN 14
LOC113732509	-1.80384943944676	protein LNK2-like isoform X4
LOC113717578	-1.80345893480341	uncharacterized protein LOC113717578
LOC113735002	-1.80004965202371	L-type lectin-domain containing receptor kinase IV.1-like
LOC113703366	-1.79910281500464	EG45-like domain containing protein
LOC113743562	-1.79801872880183	uncharacterized protein LOC113743562
LOC113713940	-1.79689844032406	BTB/POZ domain-containing protein At5g48800 isoform X2
LOC113688118	-1.79382825542996	phosphoglycerate kinase, chloroplastic
LOC113691558	-1.79323443072985	uncharacterized protein LOC113691558 isoform X6
LOC113688632	-1.79178945838607	LOW QUALITY PROTEIN: caffeine synthase 1-like
LOC113695655	-1.79071033458808	protein BIC1-like
LOC113742345	-1.78659523966817	probable arabinose 5-phosphate isomerase
LOC113729058	-1.78450983374502	uncharacterized protein LOC113729058
LOC113706938	-1.78393513566309	probable sugar phosphate/phosphate translocator At1g12500
LOC113692838	-1.78313338455203	protein WVD2-like 4 isoform X2
LOC113703127	-1.78279441495367	Unknown protein
LOC113696146	-1.78042502730401	probable LRR receptor-like serine/threonine-protein kinase At1g06840 isoform X6
LOC113730458	-1.78039229793158	villin-1-like isoform X4
LOC113691950	-1.77979132903149	protein CHLORORESPIRATORY REDUCTION 6, chloroplastic-like
LOC113727297	-1.77475009716524	protein LNK2-like isoform X5
LOC113703222	-1.77345855129916	probable carotenoid cleavage dioxygenase 4, chloroplastic
LOC113688486	-1.77166490323011	protein NUCLEAR FUSION DEFECTIVE 4-like
LOC113707437	-1.77164508553047	abscisic acid receptor PYR1-like
LOC113736675	-1.76903082104739	probable sucrose-phosphate synthase 2
LOC113697049	-1.7682282884124	2-alkenal reductase (NADP(+)-dependent)-like
LOC113728430	-1.76757413027394	phototropin-1-like
LOC113715636	-1.76742409542758	WAT1-related protein At3g28050-like
LOC113694772	-1.76590488990375	lipid phosphate phosphatase delta
LOC113693819	-1.76517689307951	binding partner of ACD11 1
LOC113731873	-1.76419845536632	potassium channel AKT2/3
LOC113709332	-1.75927818862495	homeobox-leucine zipper protein ATHB-14-like isoform X2
LOC113699334	-1.75914794186681	F-box protein At4g22280-like
LOC113734388	-1.75841040555359	uncharacterized protein LOC113734388 isoform X3
LOC113697788	-1.75809155518538	protein ACTIVITY OF BC1 COMPLEX KINASE 8, chloroplastic-like
LOC113713441	-1.75614768046477	protein DCL homolog, chloroplastic-like
LOC113705245	-1.75591823476968	pentatricopeptide repeat-containing protein At4g31850, chloroplastic-like
LOC113734000	-1.75540209356226	divinyl chlorophyllide a 8-vinyl-reductase, chloroplastic-like isoform X2
LOC113705376	-1.75387144879556	uncharacterized protein LOC113705376 isoform X3
LOC113732320	-1.75371040381372	tetraketide alpha-pyrone reductase 1-like isoform X3
LOC113693667	-1.7533104802328	rhodanese-like domain-containing protein 9, chloroplastic
LOC113705581	-1.75279195013376	uncharacterized protein LOC113705581 isoform X2
LOC113703571	-1.75155056430724	cellulose synthase A catalytic subunit 1 [UDP-forming
LOC113706403	-1.75104443011469	cytokinin dehydrogenase 7-like
LOC113709724	-1.75075839196985	ATP synthase gamma chain, chloroplastic-like
LOC113708507	-1.75016075783513	formate dehydrogenase, mitochondrial-like isoform X1
LOC113703467	-1.74937709657549	uncharacterized protein LOC113703467
LOC113704134	-1.74921476156538	putative disease resistance protein RGA3
LOC113715429	-1.74824184453025	protein NRT1/ PTR FAMILY 4.6-like isoform X2
LOC113713440	-1.74724899191026	LOW QUALITY PROTEIN: pentatricopeptide repeat-containing protein At5g18475-like
LOC113713681	-1.74584171050771	RPM1-interacting protein 4
LOC113700991	-1.74520422283304	IRK-interacting protein-like
LOC113734157	-1.74474532170975	homocysteine S-methyltransferase 2-like isoform X1
LOC113718359	-1.74287886740843	probable polygalacturonase isoform X3
LOC113706432	-1.73804063983256	pentatricopeptide repeat-containing protein At4g19440, chloroplastic-like isoform X2
LOC113725737	-1.73778130835884	SEC12-like protein 1
LOC113699220	-1.73619016320181	LOW QUALITY PROTEIN: probable galacturonosyltransferase 9
LOC113713648	-1.73509229587697	oleoyl-acyl carrier protein thioesterase, chloroplastic-like
LOC113704077	-1.73376204024614	(+)-neomenthol dehydrogenase-like isoform X3
LOC113697147	-1.73180291389969	5'-adenylylsulfate reductase-like 5
LOC113718492	-1.7303511602806	GATA transcription factor 16-like
LOC113715485	-1.72779422602418	non-specific lipid transfer protein GPI-anchored 1-like
LOC113712742	-1.72637872859494	uncharacterized protein LOC113712742 isoform X2
LOC113698028	-1.72618903250527	haloacid dehalogenase-like hydrolase domain-containing protein At4g39970 isoform X2
LOC113733266	-1.72533635869889	protein CURVATURE THYLAKOID 1A, chloroplastic-like
LOC113719530	-1.72515366957687	ankyrin repeat and death domain-containing protein 1A-like isoform X2
LOC113739569	-1.72429940971126	protein MANNAN SYNTHESIS-RELATED 2-like isoform X2
LOC113734839	-1.72374489802561	uncharacterized protein LOC113734839
LOC113715179	-1.72117942904073	uncharacterized protein LOC113715179
LOC113719130	-1.72107883973845	U-box domain-containing protein 11-like
LOC113708745	-1.71946020810941	flavin mononucleotide hydrolase 1, chloroplatic-like isoform X1
LOC113703953	-1.7190585316752	trichome differentiation protein GL1-like
LOC113727915	-1.71760542466647	endoglucanase 25-like
LOC113692394	-1.71654383295644	zinc finger protein 8-like
LOC113694624	-1.71575055423997	protein trichome birefringence-like 35
LOC113715025	-1.71575016659534	Unknown protein
LOC113697012	-1.7147190157995	uncharacterized protein LOC113697012
LOC113690425	-1.71377492576585	probable LRR receptor-like serine/threonine-protein kinase At1g53430
LOC113698024	-1.71355494560883	putative disease resistance protein RGA1 isoform X2
LOC113713245	-1.71339766796774	putative late blight resistance protein homolog R1A-10
LOC113725254	-1.71322735058715	serine/threonine-protein kinase AtPK2/AtPK19-like
LOC113712524	-1.71302335168509	uncharacterized protein LOC113712524 isoform X2
LOC113728774	-1.71246246689893	cinnamoyl-CoA reductase 1
LOC113696188	-1.70945438271659	2-oxoglutarate-Fe(II) type oxidoreductase hxnY-like
LOC113733889	-1.70674582837053	calcium-binding protein CP1-like
LOC113707199	-1.70400888660991	probable beta-D-xylosidase 6 isoform X2
LOC113717283	-1.703697906725	uncharacterized protein LOC113717283 isoform X2
LOC113725406	-1.70192746645703	probable zinc metalloprotease EGY2, chloroplastic
LOC113715166	-1.70174969134242	receptor protein-tyrosine kinase CEPR2-like
LOC113736369	-1.70147071718547	chaperone protein dnaJ 20, chloroplastic-like
LOC113743279	-1.69958224452224	callose synthase 12-like
LOC113740196	-1.6951851828728	heparanase-like protein 2
LOC113712627	-1.69408524543958	LOW QUALITY PROTEIN: NPC intracellular cholesterol transporter 1-like
LOC113718942	-1.69373498718983	receptor-like protein kinase FERONIA
LOC113717726	-1.69177180966443	MLP-like protein 34
LOC113695993	-1.69157675041834	diacylglycerol kinase 4-like
LOC113733818	-1.69032671590198	F-box/FBD/LRR-repeat protein At1g13570-like
LOC113742025	-1.68943875964052	uncharacterized GPI-anchored protein At4g28100
LOC113715630	-1.6856227553871	photosystem II reaction center W protein, chloroplastic
LOC113733116	-1.68437066929345	vacuolar protein 8-like
LOC113703085	-1.6810371146935	glycine cleavage system H protein, mitochondrial-like
LOC113726820	-1.68055335292309	uncharacterized protein LOC113726820 isoform X1
LOC113714206	-1.68030051931012	CLIP-associated protein-like
LOC113740336	-1.67786860575936	transcription factor TCP14-like
LOC113711134	-1.67747688946481	protein DCL homolog, chloroplastic-like
LOC113702506	-1.67655214478295	GATA transcription factor 7-like
LOC113706399	-1.67605194247231	glycerol-3-phosphate acyltransferase, chloroplastic-like isoform X2
LOC113703952	-1.67603076549627	probable glycosyltransferase At5g03795 isoform X1
LOC113691498	-1.67573321772756	uncharacterized protein LOC113691498 isoform X2
LOC113711255	-1.67501581628386	internal alternative NAD(P)H-ubiquinone oxidoreductase A1, mitochondrial-like
LOC113697317	-1.67313300291547	protein ECERIFERUM 3
LOC113700154	-1.66895957859544	leucine-rich repeat receptor-like serine/threonine-protein kinase BAM1
LOC113707635	-1.66800262668526	E3 ubiquitin-protein ligase WAV3-like
LOC113717992	-1.66626176599855	beta-glucosidase 11-like isoform X3
LOC113701440	-1.66530666756088	death-associated inhibitor of apoptosis 1-like isoform X2
LOC113690120	-1.66511156015514	cyclin-U1-1-like
LOC113702920	-1.66502609989585	abscisic acid receptor PYR1-like
LOC113727864	-1.66362824919156	mucin-2-like
LOC113690818	-1.6584054330336	probable sugar phosphate/phosphate translocator At3g14410
LOC113689091	-1.65647474254655	oxygen-evolving enhancer protein 2, chloroplastic-like
LOC113719101	-1.65628577380415	uncharacterized protein LOC113719101 isoform X2
LOC113726629	-1.65574034054317	protein EXORDIUM-like 2
LOC113702361	-1.65569757057526	amino acid transporter AVT6A-like
LOC113742317	-1.65424500578177	beta-glucosidase 44-like isoform X2
LOC113731945	-1.65312608463284	uncharacterized protein LOC113731945
LOC113736428	-1.65274344289303	cold and drought-regulated protein CORA-like isoform X3
LOC113701779	-1.65255687585505	probable galacturonosyltransferase 9
LOC113719161	-1.64987350987799	coiled-coil domain-containing protein SCD2
LOC113731232	-1.64981905895273	cysteine protease RD19A
LOC113725808	-1.64957455390038	GATA transcription factor 8-like
LOC113731027	-1.64922175784136	protein IQ-DOMAIN 1-like
LOC113690428	-1.64875546635433	probable leucine-rich repeat receptor-like serine/threonine-protein kinase At3g14840
LOC113726240	-1.64662630578517	integrin-linked protein kinase 1-like
LOC113719323	-1.64318768898431	protein NRT1/ PTR FAMILY 5.5-like
LOC113708858	-1.64317090089714	uncharacterized protein LOC113708858
LOC113698262	-1.64284435908269	F-box/kelch-repeat protein At1g55270
LOC113688237	-1.63969386844518	probable amino acid permease 7
LOC113700094	-1.63634798247201	uncharacterized protein At5g65660
LOC113743395	-1.63487257807256	photosystem II repair protein PSB27-H1, chloroplastic-like
LOC113731736	-1.63474322062507	probable 2-oxoglutarate-dependent dioxygenase AOP1
LOC113712419	-1.63359276329568	uncharacterized protein LOC113712419 isoform X3
LOC113691852	-1.63201770094046	probable inactive leucine-rich repeat receptor-like protein kinase At3g03770
LOC113730766	-1.62981585066867	uncharacterized protein ycf45
LOC113703300	-1.62765205195406	protein LOW PSII ACCUMULATION 3, chloroplastic-like isoform X2
LOC113693527	-1.62738901254587	uncharacterized protein LOC113693527 isoform X1
LOC113736532	-1.62647437667241	UDP-glycosyltransferase 92A1-like
LOC113741439	-1.62636854451161	uncharacterized protein LOC113741439
LOC113727796	-1.62513363516852	uncharacterized protein LOC113727796
LOC113692806	-1.62400516441946	putative elongation factor TypA-like SVR3, chloroplastic isoform X3
LOC113726294	-1.62288340728916	glucose-1-phosphate adenylyltransferase large subunit 1-like
LOC113702421	-1.6226385656029	O-fucosyltransferase 31-like
LOC113708606	-1.62178871738307	aminomethyltransferase, mitochondrial-like
LOC113693649	-1.62178609352614	uncharacterized protein LOC113693649
LOC113701028	-1.61825254869895	xyloglucan galactosyltransferase XLT2-like
LOC113734626	-1.61546273000118	transcription factor bHLH128-like isoform X2
LOC113741934	-1.61331935987815	protein FANTASTIC FOUR 1-like
LOC113713046	-1.61035922842535	transcription factor IBH1-like
LOC113731913	-1.60722636195327	ion channel POLLUX isoform X3
LOC113698106	-1.60686466321985	uncharacterized protein LOC113698106
LOC113700150	-1.6064466291145	auxilin-like protein 1 isoform X2
LOC113725266	-1.60528504597607	uncharacterized membrane protein YHL071W-like isoform X2
LOC113706632	-1.60293989522421	protein WVD2-like 5 isoform X4
LOC113693874	-1.60107379067105	peptidyl-prolyl cis-trans isomerase CYP28, chloroplastic
LOC113719172	-1.60093303572639	caffeoylshikimate esterase-like
LOC113702075	-1.59764586160325	magnesium-chelatase subunit ChlI, chloroplastic-like
LOC113732630	-1.59733376179965	LRR receptor-like serine/threonine-protein kinase EFR isoform X1
LOC113735612	-1.59728616099645	E3 ubiquitin-protein ligase MARCH1-like
LOC113708873	-1.59683011945374	G-type lectin S-receptor-like serine/threonine-protein kinase At1g11330 isoform X2
LOC113707285	-1.59663045080525	plastidal glycolate/glycerate translocator 1, chloroplastic-like
LOC113694681	-1.5963810842538	rhodanese-like domain-containing protein 9, chloroplastic
LOC113730444	-1.59624802902999	mannose-1-phosphate guanylyltransferase 1
LOC113703711	-1.59354479615102	protein unc-13 homolog
LOC113739632	-1.59351639047884	protein TSS-like isoform X2
LOC113713370	-1.58947917036983	geranylgeranyl pyrophosphate synthase, chloroplastic-like
LOC113704576	-1.58938301379614	probable carboxylesterase 15
LOC113708963	-1.58733879280647	Unknown protein
LOC113740373	-1.58667218172101	uncharacterized protein LOC113740373
LOC113726186	-1.58595024509108	shaggy-related protein kinase eta isoform X2
LOC113697465	-1.58580465269461	protein phosphatase 2C and cyclic nucleotide-binding/kinase domain-containing protein-like isoform X2
LOC113726522	-1.58494209273431	QWRF motif-containing protein 2-like isoform X2
LOC113698015	-1.58433104589839	putative disease resistance protein RGA3
LOC113732651	-1.58353651595693	putative ER lumen protein-retaining receptor C28H8.4
LOC113701191	-1.58198451351896	uncharacterized protein LOC113701191 isoform X1
LOC113727828	-1.57996836118388	psbP domain-containing protein 1, chloroplastic-like
LOC113716971	-1.5797731018496	uncharacterized protein LOC113716971
LOC113708987	-1.57888425561388	protein C2-DOMAIN ABA-RELATED 11
LOC113691603	-1.57785518364072	F-box/LRR-repeat protein At1g67190-like isoform X2
LOC113687968	-1.57767655455948	NEP1-interacting protein 1-like isoform X2
LOC113693755	-1.57728382298451	fructose-1,6-bisphosphatase, chloroplastic-like
LOC113712438	-1.57668110143322	LOW QUALITY PROTEIN: glutamate receptor 3.3
LOC113702816	-1.57653342445383	plastidal glycolate/glycerate translocator 1, chloroplastic
LOC113697256	-1.5739093227295	sodium/pyruvate cotransporter BASS2, chloroplastic-like
LOC113733968	-1.57370140151105	xyloglucan 6-xylosyltransferase 2-like
LOC113724983	-1.5729791750631	uncharacterized protein LOC113724983 isoform X5
LOC113701228	-1.56836742956106	diacylglycerol O-acyltransferase 2D-like
LOC113705623	-1.5679481359496	F-box protein PP2-A13-like isoform X1
LOC113702323	-1.56729595738777	subtilisin-like protease SBT3.9
LOC113688035	-1.56467136846739	uncharacterized protein LOC113688035
LOC113690780	-1.56320540618332	pentatricopeptide repeat-containing protein At2g42920, chloroplastic
LOC113710407	-1.55935983207088	BAG family molecular chaperone regulator 2-like isoform X2
LOC113730214	-1.55799658066389	uncharacterized protein LOC113730214 isoform X1
LOC113743418	-1.55775003655303	receptor kinase-like protein Xa21
LOC113742144	-1.55768581614297	pleiotropic drug resistance protein 1-like
LOC113725208	-1.55554007242472	ethylene-responsive transcription factor 2-like
LOC113690956	-1.55518875746564	phospholipase A1-IIdelta-like
LOC113729861	-1.55494651913197	uncharacterized protein LOC113729861
LOC113715766	-1.55448037802374	ureide permease 1-like isoform X2
LOC113732133	-1.55394470095313	uncharacterized protein LOC113732133 isoform X2
LOC113726958	-1.55278470105366	uncharacterized protein LOC113726958
LOC113725689	-1.55170396410287	pleiotropic drug resistance protein 2-like
LOC113689845	-1.55087416924965	probable serine/threonine-protein kinase At1g54610
LOC113727639	-1.54990811476179	psbP domain-containing protein 7, chloroplastic-like
LOC113732964	-1.54764191761446	uncharacterized protein LOC113732964
LOC113698737	-1.54714970840002	phosphatidylinositol transfer protein 3-like
LOC113702851	-1.54665511073279	cytochrome P450 CYP72A219-like
LOC113732998	-1.54578367853689	psbP domain-containing protein 1, chloroplastic-like
LOC113717810	-1.543298911317	uncharacterized protein LOC113717810 isoform X1
LOC113732366	-1.54140788595724	protein PNS1-like
LOC113742676	-1.54031112103224	zinc finger protein BRUTUS-like
LOC113727575	-1.53920800071203	UPF0603 protein At1g54780, chloroplastic-like
LOC113697165	-1.53738133045957	uncharacterized protein LOC113697165
LOC113725860	-1.5369817727679	sulfite exporter TauE/SafE family protein 2-like
LOC113690716	-1.53639817203866	E3 ubiquitin-protein ligase RMA3-like
LOC113687950	-1.53622502108305	serine/threonine-protein kinase SRK2B-like isoform X3
LOC113702745	-1.53604413534293	uncharacterized protein At2g37660, chloroplastic-like
LOC113706553	-1.53506320916521	probable LRR receptor-like serine/threonine-protein kinase At1g63430
LOC113730943	-1.53291343913189	epoxide hydrolase A-like isoform X2
LOC113734308	-1.53213776456721	plastid-lipid-associated protein 6, chloroplastic
LOC113688131	-1.53160400830371	fatty acid hydroperoxide lyase, chloroplastic-like
LOC113727157	-1.53152329758135	protein PNS1-like
LOC113697087	-1.52904941768008	alpha-L-arabinofuranosidase 1-like
LOC113687979	-1.52768147456288	zinc transporter 2-like
LOC113718685	-1.52669786835172	putative potassium transporter 12 isoform X1
LOC113703611	-1.52442098972757	probable sugar phosphate/phosphate translocator At2g25520
LOC113726685	-1.52333266412553	15-cis-phytoene desaturase, chloroplastic/chromoplastic-like
LOC113732874	-1.52293459821558	transcription factor bHLH25-like
LOC113716585	-1.52269829768795	chlorophyll a-b binding protein, chloroplastic-like
LOC113736708	-1.52253946411865	Unknown protein
LOC113732575	-1.52137299280112	protein ZINC INDUCED FACILITATOR-LIKE 1-like isoform X4
LOC113712898	-1.51899270601376	uncharacterized protein LOC113712898 isoform X2
LOC113743532	-1.51703583711682	photosystem II 10 kDa polypeptide, chloroplastic-like
LOC113724692	-1.51527177687505	uncharacterized protein LOC113724692
LOC113716732	-1.51420772791744	putative potassium transporter 12 isoform X3
LOC113703963	-1.51377051154048	pentatricopeptide repeat-containing protein At1g31920
LOC113719403	-1.51288931144894	uncharacterized protein At4g22758-like
LOC113734223	-1.51288879596046	histone H1.1-like
LOC113706382	-1.5098351561699	uncharacterized protein LOC113706382
LOC113708503	-1.50703198075582	calcium-dependent protein kinase-like
LOC113734550	-1.50613234913854	cold and drought-regulated protein CORA-like isoform X2
LOC113706947	-1.50421522201681	protein NRT1/ PTR FAMILY 1.1-like
LOC113710195	-1.50392795356225	protein PLASTID TRANSCRIPTIONALLY ACTIVE 16, chloroplastic-like isoform X4
LOC113701878	-1.50258520089856	probable LRR receptor-like serine/threonine-protein kinase At4g37250
LOC113689677	-1.50125068348559	photosystem II repair protein PSB27-H1, chloroplastic-like
LOC113716752	-1.50094023110087	dnaJ homolog subfamily B member 1-like
LOC113691676	-1.50017904818666	thylakoid lumenal 16.5 kDa protein, chloroplastic-like
LOC113688505	-1.49895214341798	protochlorophyllide-dependent translocon component 52, chloroplastic-like
LOC113706384	-1.4984711618397	uncharacterized protein LOC113706384
LOC113712916	-1.49833036942398	putative 12-oxophytodienoate reductase 11 isoform X1
LOC113719060	-1.49744387376718	uncharacterized protein LOC113719060 isoform X2
LOC113698744	-1.4969505834133	peptidyl-prolyl cis-trans isomerase CYP38, chloroplastic-like
LOC113708752	-1.49449335840684	uncharacterized protein LOC113708752 isoform X4
LOC113731841	-1.49425111493858	probable plastid-lipid-associated protein 4, chloroplastic isoform X4
LOC113700968	-1.4937354934244	haloacid dehalogenase-like hydrolase domain-containing protein At4g39970 isoform X2
LOC113693574	-1.49245404592772	probable glycosyltransferase STELLO2
[truncated: 78 more rows]

## Sheet: SWD_vs_WW_eCO2_up
Gene ID	Log2FC	Protein Name
LOC113701328	10.6112143111719	uncharacterized protein LOC113701328
LOC113737212	10.0725105674063	low-temperature-induced 65 kDa protein-like
LOC113724173	9.94149059226246	Unknown protein
LOC113706184	8.91955588107383	expansin-like B1
LOC113713504	8.91640233651794	protein DMP6-like
LOC113706427	8.8533590782753	expansin-like B1
LOC113690412	8.80594471936076	60S acidic ribosomal protein P0-like
LOC113698601	8.68794053051127	uncharacterized protein LOC113698601 isoform X3
LOC113740598	8.61825392063302	uncharacterized protein LOC113740598
LOC113692954	8.57406721994617	cell wall protein IFF6-like
LOC113735897	8.31666769861529	L-type lectin-domain containing receptor kinase IV.1-like
LOC113729415	8.30693224318445	uncharacterized protein LOC113729415 isoform X1
LOC113741877	8.09860250667474	probable E3 ubiquitin-protein ligase ATL44
LOC113703110	7.98712612529682	uncharacterized protein LOC113703110
LOC113706185	7.76618043235782	expansin-like B1
LOC113741836	7.56402656479402	uncharacterized protein LOC113741836 isoform X2
LOC113725800	7.45127831919604	transketolase, chloroplastic-like
LOC113742174	7.25019469732535	cysteine proteinase inhibitor-like
LOC113740805	7.24979793470148	cysteine proteinase inhibitor-like
LOC113692720	7.21511504916042	defensin-like protein P322
LOC113741996	7.18797850621157	late embryogenesis abundant protein Dc3-like
LOC113717312	7.17565796689564	non-specific lipid-transfer protein 1
LOC113693327	7.13544248043334	uncharacterized protein LOC113693327
LOC113723847	7.08426199239185	glycine-rich cell wall structural protein 2-like
LOC113698743	7.08016717700118	ethylene-responsive transcription factor 1B-like
LOC113708785	7.01473109002974	putative 12-oxophytodienoate reductase 11
LOC113723858	7.01194979184144	LOW QUALITY PROTEIN: transketolase, chloroplastic-like
LOC113736446	6.95976384721501	holotricin-3-like
LOC113734863	6.8586988704275	low-temperature-induced 65 kDa protein-like
LOC113739517	6.84548265477498	uncharacterized protein LOC113739517
LOC113739425	6.81676944402617	putative cysteine proteinase inhibitor 7
LOC113695644	6.81335090610376	class I heat shock protein-like
LOC113704200	6.75288280294488	homeobox-leucine zipper protein ATHB-12-like
LOC113688142	6.6809582460041	late embryogenesis abundant protein EMB564-like
LOC113739647	6.6355210000824	heat shock 70 kDa protein-like
LOC113742943	6.50340753760829	sucrose synthase-like
LOC113690172	6.48981187280727	60S ribosomal protein L10-like
LOC113736441	6.46821755787124	glycine-rich cell wall structural protein-like isoform X1
LOC113716991	6.46642969089583	acidic endochitinase-like
LOC113729601	6.45107817013907	pathogenesis-related protein PR-4-like
LOC113694494	6.37688863912774	uncharacterized protein LOC113694494
LOC113730430	6.36865705740407	uncharacterized protein LOC113730430
LOC113739379	6.24971226768711	aldehyde dehydrogenase family 2 member C4-like
LOC113712365	6.16787010254189	cytochrome P450 CYP82D47-like
LOC113740436	6.10192604437863	late embryogenesis abundant protein Dc3-like
LOC113736293	6.08057344257085	cellulose synthase-like protein D1
LOC113727829	6.07263783704627	galactinol synthase 2-like
LOC113706564	6.05626741835428	protein phosphatase 2C 51-like
LOC113700219	6.00243330327751	desiccation-related protein clone PCC6-19-like
LOC113716423	6.00145319329839	thaumatin-like protein
LOC113724097	5.95151481110165	uncharacterized protein LOC113724097
LOC113736076	5.91088313203288	uncharacterized protein LOC113736076
LOC113728510	5.79574072668956	glycine-rich cell wall structural protein 2-like
LOC113737859	5.7726340673772	late embryogenesis abundant protein D-29-like
LOC113737953	5.73738230681322	transcription factor MYB48-like
LOC113728475	5.66199947920939	uncharacterized protein LOC113728475
LOC113731565	5.63926954379151	pathogenesis-related protein PR-1 type-like
LOC113734607	5.58856299077945	major allergen Pru ar 1-like
LOC113697412	5.57300826660116	beta-fructofuranosidase, insoluble isoenzyme 1-like isoform X2
LOC113743740	5.56600776303953	60S ribosomal protein L10-like
LOC113701443	5.55909853663822	basic leucine zipper 25-like
LOC113705561	5.55688093581828	Unknown protein
LOC113703008	5.53563922160151	protein phosphatase 2C 51-like
LOC113695236	5.49846241884189	xyloglucan endotransglucosylase/hydrolase protein 22-like
LOC113692031	5.49705651303465	probable glutathione S-transferase
LOC113692361	5.47793813855184	LOW QUALITY PROTEIN: class I heat shock protein-like
LOC113727830	5.43144742157914	galactinol synthase 2-like
LOC113743599	5.41407335941444	NAC domain-containing protein 72-like
LOC113726037	5.40129963574754	late embryogenesis abundant protein At3g53040-like
LOC113691271	5.36519856499681	aldehyde dehydrogenase family 2 member C4-like
LOC113692198	5.35378539865251	probable purple acid phosphatase 20
LOC113701458	5.34408167755493	ATP-dependent zinc metalloprotease FTSH 6, chloroplastic-like
LOC113738934	5.33311704338989	protein LYK5-like
LOC113733806	5.21173065895573	cysteine proteinase inhibitor 5-like
LOC113741837	5.20224808817591	inositol oxygenase 1-like
LOC113734989	5.19161598529473	major allergen Pru ar 1-like isoform X2
LOC113736450	5.16377587860599	glycine-rich cell wall structural protein-like
LOC113734876	5.1287236433516	late embryogenesis abundant protein D-29-like isoform X2
LOC113723028	5.07289199199272	subtilisin inhibitor CLSI-I-like
LOC113740252	5.05959198839315	uncharacterized protein LOC113740252
LOC113707704	5.00031807761357	patatin-like protein 2
LOC113726413	4.96859347404111	probable carboxylesterase 7
LOC113724829	4.93270057497284	small heat shock protein, chloroplastic-like
LOC113698659	4.89536026466357	ATP-dependent zinc metalloprotease FTSH 6, chloroplastic-like
LOC113692465	4.86085186573383	UDP-glycosyltransferase 71K1-like
LOC113689826	4.85753534386641	NAC domain-containing protein 72-like
LOC113709442	4.81057904694932	putative 12-oxophytodienoate reductase 11
LOC113703570	4.68673507305263	thaumatin-like protein
LOC113698942	4.67540043468416	basic leucine zipper 25-like
LOC113711848	4.65760022249643	purine permease 1-like
LOC113703176	4.65495543307192	uncharacterized protein LOC113703176 isoform X1
LOC113692130	4.65197452731569	early nodulin-like protein 2
LOC113695700	4.65097202155605	protein LE25-like
LOC113740563	4.64778252829688	HVA22-like protein e
LOC113692189	4.63782493290858	late embryogenesis abundant protein 46-like
LOC113692543	4.63772420410146	putative phytosulfokines 6
LOC113691774	4.63174379256023	putative polyol transporter 1
LOC113733473	4.62226834524193	ferredoxin, root R-B2-like isoform X2
LOC113740410	4.61499534818293	HVA22-like protein e
LOC113690773	4.56016215263164	7-deoxyloganetin glucosyltransferase-like
LOC113694269	4.55492268586792	amino acid transporter AVT1A-like isoform X2
LOC113714366	4.55257847924973	soyasapogenol B glucuronide galactosyltransferase-like
LOC113707930	4.54399552182178	protein kinase PINOID-like
LOC113692190	4.53268154982219	18 kDa seed maturation protein-like
LOC113731518	4.49255349989984	zinc finger protein ZAT10-like
LOC113695145	4.47693837982466	uncharacterized protein LOC113695145 isoform X1
LOC113729868	4.46492040101263	small heat shock protein, chloroplastic
LOC113691985	4.43838984424461	nuclear transcription factor Y subunit A-4-like isoform X5
LOC113703905	4.42786934168848	alcohol dehydrogenase-like 7
LOC113718755	4.41594933948787	probable WRKY transcription factor 75
LOC113731449	4.40028387740873	scopoletin glucosyltransferase-like
LOC113710230	4.3960120350484	probable protein phosphatase 2C 24
LOC113713347	4.3959864469466	LOW QUALITY PROTEIN: flavonol synthase/flavanone 3-hydroxylase-like
LOC113730933	4.38400692492364	S-linalool synthase-like
LOC113695173	4.38190512074381	zeatin O-glucosyltransferase-like
LOC113698531	4.37240852219135	cytochrome P450 CYP736A12-like
LOC113695658	4.36517095901179	uncharacterized protein LOC113695658
LOC113731964	4.35081461725911	22.0 kDa class IV heat shock protein-like
LOC113728414	4.3366650717839	probable serine/threonine-protein kinase PBL7
LOC113717301	4.33218555665533	uncharacterized protein LOC113717301
LOC113710868	4.32203356413121	flavonol synthase/flavanone 3-hydroxylase-like
LOC113695654	4.3049171358168	uncharacterized protein LOC113695654
LOC113725531	4.28345885251393	Unknown protein
LOC113726532	4.26114194914938	pathogenesis-related leaf protein 4-like
LOC113695604	4.23757015024087	exocyst complex component EXO70H1-like
LOC113709717	4.16998747986298	monosaccharide-sensing protein 2-like
LOC113729382	4.1641276178293	probable protein phosphatase 2C 24
LOC113729974	4.15400727582398	acidic endochitinase SE2-like
LOC113734563	4.14654571640577	cold and drought-regulated protein CORA-like
LOC113691978	4.13715530319306	xyloglucan endotransglucosylase/hydrolase protein 22-like
LOC113715746	4.136187565432	probable S-adenosylmethionine-dependent methyltransferase At5g38780 isoform X2
LOC113716523	4.13398361364084	probable WRKY transcription factor 75
LOC113715515	4.11009881599924	thaumatin-like protein
LOC113700657	4.06953435509586	NAC domain-containing protein 104-like
LOC113715771	4.06882391372036	uncharacterized protein LOC113715771
LOC113703289	4.06289263858203	protein STAY-GREEN, chloroplastic-like
LOC113740137	4.04930135452195	protein ASPARTIC PROTEASE IN GUARD CELL 1-like
LOC113692828	4.04474377484177	glucan endo-1,3-beta-glucosidase, acidic-like
LOC113701609	4.02995969404874	salicylic acid-binding protein 2-like
LOC113712224	4.02860411595462	protein DMP6-like
LOC113713518	3.96721721863593	cytochrome P450 CYP82D47-like
LOC113696385	3.96161891992847	nuclear transcription factor Y subunit B-5-like
LOC113740314	3.95188450174768	uncharacterized protein LOC113740314 isoform X2
LOC113716652	3.94330757146429	uncharacterized protein LOC113716652
LOC113723754	3.93898757533544	uncharacterized protein LOC113723754
LOC113731176	3.93307737006606	uncharacterized protein LOC113731176
LOC113736437	3.89117044287939	glycine-rich RNA-binding protein 10-like
LOC113699275	3.85247061170947	mannose-6-phosphate isomerase 1-like
LOC113734971	3.83781152629101	uncharacterized protein LOC113734971
LOC113709649	3.81280614518598	probable serine/threonine-protein kinase PBL5 isoform X2
LOC113691865	3.80576191821966	glycine-rich cell wall structural protein 2-like
LOC113701572	3.7970268854892	protein IQ-DOMAIN 1-like
LOC113734333	3.79461703311931	Unknown protein
LOC113712638	3.77800955210336	uncharacterized protein LOC113712638 isoform X3
LOC113736835	3.77666052825616	L-type lectin-domain containing receptor kinase IV.1-like
LOC113732386	3.7727413016569	ribulose bisphosphate carboxylase/oxygenase activase, chloroplastic-like
LOC113725653	3.74897582150901	ferredoxin, root R-B2-like isoform X2
LOC113727258	3.74782402258938	cytochrome P450 87A3-like
LOC113732907	3.72937327182945	pentatricopeptide repeat-containing protein At1g12300, mitochondrial-like
LOC113687764	3.72919434263622	transcription factor JUNGBRUNNEN 1-like
LOC113725086	3.72610464072457	Unknown protein
LOC113713597	3.70791105692778	probable carboxylesterase 2
LOC113736444	3.68163356166827	glycine-rich cell wall structural protein-like
LOC113715927	3.64901099800812	heat stress transcription factor A-6b-like isoform X1
LOC113698677	3.63606325404837	cytochrome P450 81E8-like
LOC113729880	3.63481435136217	homeobox-leucine zipper protein ATHB-12-like
LOC113708505	3.62770996460367	7-deoxyloganetic acid glucosyltransferase-like
LOC113736292	3.62565850209185	putative F-box protein PP2-B12
LOC113733488	3.61585540561374	late embryogenesis abundant protein-like
LOC113694109	3.61084717614768	zinc finger CCCH domain-containing protein 20-like
LOC113717953	3.60926987773149	ninja-family protein AFP1-like
LOC113715354	3.60471037656305	Unknown protein
LOC113692853	3.60247834500611	probable galactinol--sucrose galactosyltransferase 6
LOC113711990	3.58198658333832	Unknown protein
LOC113710244	3.5754866737115	fibrous sheath CABYR-binding protein-like
LOC113702948	3.55864182470387	glutathione S-transferase T1-like
LOC113693701	3.55319330542449	protein NRT1/ PTR FAMILY 3.1-like isoform X2
LOC113731956	3.54617537715149	protein NRT1/ PTR FAMILY 4.3
LOC113691374	3.5436153793745	uncharacterized protein LOC113691374
LOC113713451	3.54331731070169	Unknown protein
LOC113726525	3.53723566740928	zinc finger protein ZAT10-like
LOC113697188	3.53394328053649	ATP-dependent 6-phosphofructokinase 6-like
LOC113695699	3.52577731703179	18 kDa seed maturation protein-like
LOC113710909	3.52500164531347	glucose-1-phosphate adenylyltransferase large subunit 1-like
LOC113730069	3.49630076589916	O-glucosyltransferase rumi homolog isoform X1
LOC113688640	3.49286990127659	uncharacterized protein LOC113688640
LOC113690164	3.48583425523522	sodium/calcium exchanger NCL2-like
LOC113718867	3.48170215596565	uncharacterized protein LOC113718867
LOC113712061	3.47412704936851	Unknown protein
LOC113720826	3.45716160889856	homeobox-leucine zipper protein ATHB-7-like
LOC113695446	3.43794988581744	probable purple acid phosphatase 20
LOC113715503	3.43514320426448	uncharacterized protein LOC113715503
LOC113740375	3.43038380535043	protein NRT1/ PTR FAMILY 2.11-like
LOC113692018	3.43037108444675	UDP-glycosyltransferase 71K1-like
LOC113694662	3.42651497473239	putative cyclin-D7-1
LOC113692546	3.4198176281408	Unknown protein
LOC113743457	3.41595176507139	beta-amylase-like
LOC113733304	3.41290284750977	putative RING-H2 finger protein ATL21A
LOC113741792	3.41195923265285	uncharacterized protein LOC113741792
LOC113736587	3.37186900897268	cytochrome P450 71A2-like
LOC113713654	3.36779218380853	protein EXORDIUM-like
LOC113716372	3.36479293412535	ninja-family protein AFP1-like
LOC113704068	3.36198779386486	oleosin 1-like isoform X1
LOC113708005	3.3584183393625	monosaccharide-sensing protein 2-like
LOC113733399	3.35632378973406	uncharacterized protein LOC113733399
LOC113734231	3.35115218306959	UDP-glucuronic acid decarboxylase 2-like
LOC113717780	3.3368807826286	18.5 kDa class I heat shock protein-like
LOC113695598	3.33625776532592	uncharacterized protein LOC113695598 isoform X2
LOC113703885	3.3350957605865	alcohol dehydrogenase-like 7 isoform X1
LOC113739403	3.33337759342251	uncharacterized protein LOC113739403
LOC113693764	3.30993789406256	linamarin synthase 2-like
LOC113701701	3.30640518412046	probable acyl-activating enzyme 5, peroxisomal
LOC113725999	3.29105077581388	CBS domain-containing protein CBSX5-like
LOC113730422	3.28371789153396	17.4 kDa class I heat shock protein-like
LOC113689844	3.27752334091632	1-aminocyclopropane-1-carboxylate oxidase homolog 1-like
LOC113692339	3.26846481531234	flavanone 3-dioxygenase 2-like
LOC113717270	3.26757277159312	uncharacterized protein LOC113717270
LOC113729600	3.26549386630218	non-symbiotic hemoglobin 2-like
LOC113694250	3.26533841867733	Unknown protein
LOC113737105	3.25747007036927	uncharacterized protein LOC113737105 isoform X2
LOC113699961	3.23798708164904	probable 1-deoxy-D-xylulose-5-phosphate synthase 2, chloroplastic
LOC113701999	3.22633006684393	uncharacterized protein LOC113701999
LOC113736294	3.21147057710213	F-box protein PP2-B10-like
LOC113743385	3.20805407272225	protein DETOXIFICATION 19-like isoform X2
LOC113713327	3.20301152248012	annexin D1-like
LOC113690602	3.20257820335752	cytochrome P450 CYP72A219-like
LOC113706376	3.19380121105566	flavanone 7-O-glucoside 2''-O-beta-L-rhamnosyltransferase-like
LOC113732999	3.18959010126124	galactinol synthase 2-like
LOC113715721	3.18576848862039	beta-glucosidase 40-like
LOC113743196	3.17702051075845	uncharacterized protein LOC113743196
LOC113689740	3.1746360859187	uncharacterized protein LOC113689740
LOC113742543	3.16940961016327	Unknown protein
LOC113726486	3.16497046179639	uncharacterized protein LOC113726486
LOC113730296	3.15397443603492	arogenate dehydrogenase 1, chloroplastic-like isoform X3
LOC113695442	3.14927263033446	uncharacterized protein LOC113695442
LOC113690189	3.14181370075477	transcription factor JUNGBRUNNEN 1-like
LOC113705887	3.13828291519942	uncharacterized protein LOC113705887
LOC113698109	3.13276109505208	universal stress protein PHOS34-like
LOC113700953	3.13124802896049	gibberellin 20 oxidase 2-like
LOC113698296	3.12672482742542	uncharacterized protein LOC113698296
LOC113732426	3.11926348163372	protein IQ-DOMAIN 14-like
LOC113736526	3.11430475878171	UDP-glucuronic acid decarboxylase 2-like
LOC113695405	3.11363961610777	uncharacterized protein LOC113695405
LOC113740105	3.10625760679401	uncharacterized protein LOC113740105 isoform X2
LOC113715192	3.10625676031317	purine permease 3-like
LOC113714462	3.10444178464972	uncharacterized WD repeat-containing protein C2A9.03-like isoform X3
LOC113698380	3.0775476649106	LOW QUALITY PROTEIN: proline dehydrogenase 2, mitochondrial-like
LOC113743298	3.07078715539666	uncharacterized membrane protein At3g27390-like isoform X3
LOC113694576	3.06864909153802	uncharacterized protein LOC113694576
LOC113690948	3.06788913408441	clathrin light chain 1-like isoform X1
LOC113706342	3.06603077332459	glutathione S-transferase T1-like
LOC113731617	3.06189085163951	nicotinamidase 1-like isoform X2
LOC113715194	3.05745629945469	calcium uniporter protein 4, mitochondrial-like
LOC113698674	3.05583530557771	late embryogenesis abundant protein D-29-like
LOC113731753	3.04498645793823	uncharacterized protein LOC113731753
LOC113691270	3.03641106090482	aldehyde dehydrogenase family 2 member C4-like
LOC113717848	3.03103357221595	translocator protein homolog
LOC113728027	3.03004223052563	(+)-neomenthol dehydrogenase-like
LOC113709675	3.02882698107174	protein PHLOEM PROTEIN 2-LIKE A9-like
LOC113703170	3.02802835539682	serine carboxypeptidase-like 2 isoform X2
LOC113711936	3.02397811228918	alanine--glyoxylate aminotransferase 2 homolog 3, mitochondrial-like
LOC113692898	3.01504826403971	pathogen-associated molecular patterns-induced protein A70-like
LOC113734610	3.01247319096246	major allergen Pru ar 1-like
LOC113710359	3.00890853541934	17.3 kDa class I heat shock protein-like
LOC113694074	3.0019186929054	cytochrome P450 93A3-like
LOC113725022	3.00125083873558	oxalate--CoA ligase-like
LOC113717961	2.99637123629608	uncharacterized protein LOC113717961
LOC113701449	2.99425789662983	salicylic acid-binding protein 2-like
LOC113715231	2.9923148946257	Unknown protein
LOC113718876	2.98821789414342	ELMO domain-containing protein A-like isoform X5
LOC113738672	2.98586756281653	Unknown protein
LOC113702098	2.98469584182506	mannose-6-phosphate isomerase 2-like
LOC113708058	2.98209557974054	uncharacterized protein LOC113708058
LOC113696377	2.98104555042517	ankyrin-3-like
LOC113714490	2.98103854913862	abscisic stress-ripening protein 2-like
LOC113718921	2.97782328098591	isoflavone reductase homolog PCBER-like isoform X1
LOC113709384	2.95563815821245	small ubiquitin-related modifier 1-like
LOC113717023	2.9528654713162	protein MIZU-KUSSEI 1
LOC113743630	2.95107967218478	uncharacterized protein LOC113743630
LOC113705558	2.93515461090892	protein P21-like
LOC113694058	2.93156346733748	probable glutathione S-transferase
LOC113724934	2.93077675599641	acidic endochitinase SE2-like
LOC113695514	2.90619952354116	cysteine-rich and transmembrane domain-containing protein WIH1
LOC113732041	2.90484973232837	FCS-Like Zinc finger 3-like
LOC113737795	2.90341432428902	uncharacterized protein LOC113737795
LOC113712454	2.89728885779803	uncharacterized WD repeat-containing protein C2A9.03-like isoform X3
LOC113732985	2.89567949764865	transcription factor bHLH149-like
LOC113736475	2.8716111752559	probable aldo-keto reductase 2
LOC113738233	2.8673853973085	sugar transport protein 13-like
LOC113715568	2.84519190622754	clavaminate synthase-like protein At3g21360
LOC113711766	2.8420913795515	U-box domain-containing protein 28-like
LOC113691066	2.83422116636005	peroxidase 3-like
LOC113741729	2.82617492071528	uncharacterized protein LOC113741729 isoform X3
LOC113719352	2.82577328449707	Unknown protein
LOC113694867	2.82065751713103	blue copper protein-like
LOC113725935	2.81922172387512	uncharacterized protein LOC113725935
LOC113728459	2.80930117334343	ethylene-responsive transcription factor ERF027-like
LOC113702694	2.80098702553944	premnaspirodiene oxygenase-like
LOC113716698	2.80016823268196	NADP-dependent D-sorbitol-6-phosphate dehydrogenase-like
LOC113717819	2.79813472192879	uncharacterized protein LOC113717819
LOC113706192	2.78793538553676	probable transcription factor MYB58
LOC113730098	2.78284000228392	putative non-specific lipid-transfer protein 14
LOC113715545	2.77366999804967	probable galacturonosyltransferase-like 9
LOC113718801	2.76847312590413	uncharacterized protein LOC113718801
LOC113707747	2.763799004395	putative polyol transporter 1
LOC113741403	2.75173500709594	uncharacterized protein LOC113741403
LOC113713048	2.74739697399062	beta-amyrin 28-monooxygenase-like
LOC113703288	2.74078204590342	uncharacterized protein LOC113703288 isoform X2
LOC113692612	2.73063105517515	F-box protein CPR1-like
LOC113716512	2.72913797901607	uncharacterized protein LOC113716512
LOC113728149	2.7287399998078	BAG family molecular chaperone regulator 6-like
LOC113701515	2.72819547280774	protein DETOXIFICATION 49-like
LOC113699944	2.72716857390798	alpha-dioxygenase 1-like
LOC113731646	2.7264902592168	peptidyl-prolyl cis-trans isomerase FKBP12-like
LOC113731538	2.72571610216529	flavonol synthase/flavanone 3-hydroxylase-like
LOC113712158	2.72266131401971	glutathione transferase GST 23-like
LOC113712258	2.71971836279688	uncharacterized protein LOC113712258
LOC113687897	2.71971641576841	uncharacterized protein LOC113687897
LOC113743611	2.71816933057669	septum-promoting GTP-binding protein 1-like
LOC113718927	2.71352018953821	uncharacterized protein LOC113718927
LOC113692196	2.70533009210215	transcription factor bHLH61-like
LOC113734025	2.69833465482439	uncharacterized protein LOC113734025
LOC113697378	2.68151531330608	temperature-induced lipocalin-1-like
LOC113734746	2.67026865458311	uncharacterized protein LOC113734746
LOC113734685	2.66710165573963	uncharacterized protein LOC113734685
LOC113695129	2.66346306548667	uncharacterized protein LOC113695129
LOC113716804	2.65624034786441	putative polyol transporter 1
LOC113738189	2.6542760511168	elongation factor Tu, mitochondrial-like
LOC113699301	2.65368711335291	probable acyl-activating enzyme 5, peroxisomal
LOC113726963	2.65104290062034	Unknown protein
LOC113742542	2.64465124629384	uncharacterized protein LOC113742542 isoform X2
LOC113694531	2.64256882634152	polygalacturonase inhibitor-like
LOC113713197	2.63933751054733	glucose-1-phosphate adenylyltransferase large subunit 1-like isoform X2
LOC113734801	2.63568957570987	translocator protein homolog
LOC113717984	2.63081527016348	nucleolar protein 16-like
LOC113694261	2.6279613779783	uncharacterized protein LOC113694261
LOC113741527	2.62795588427932	calcium-binding allergen Ole e 8-like
LOC113736389	2.62724931321623	sugar transporter ERD6-like 16 isoform X2
LOC113730387	2.62049092847861	probable aquaporin PIP1-2
LOC113729577	2.61918637409583	17.5 kDa class I heat shock protein-like
LOC113713262	2.61780677559588	uncharacterized protein LOC113713262 isoform X2
LOC113726409	2.61747920563937	2-hydroxyisoflavanone dehydratase-like
LOC113733849	2.61746850356635	galactinol synthase 2-like isoform X3
LOC113706439	2.6171043265316	glutaredoxin-C6-like
LOC113695985	2.61244270360595	probable galactinol--sucrose galactosyltransferase 6
LOC113742083	2.61008530452961	U-box domain-containing protein 19-like
LOC113736834	2.60828458047848	L-type lectin-domain containing receptor kinase IV.1-like
LOC113738017	2.60367933445836	galactinol synthase 2-like
LOC113701246	2.60270824509091	proline dehydrogenase 2, mitochondrial-like isoform X1
LOC113740013	2.59046886628571	DNA replication complex GINS protein PSF1-like isoform X2
LOC113712506	2.58075358815281	LOW QUALITY PROTEIN: mitochondrial uncoupling protein 4-like
LOC113703958	2.56933699905485	B2 protein-like
LOC113743804	2.56663759733326	sigma intracellular receptor 2-like
LOC113718563	2.56207950088938	proline-rich receptor-like protein kinase PERK1
LOC113741205	2.56088415647057	ubiquitin-conjugating enzyme E2-23 kDa-like isoform X1
LOC113697171	2.55868067481902	metallothionein-like protein 1
LOC113709337	2.55845771632952	probable WRKY transcription factor 31
LOC113717599	2.55742090161251	protein EARLY-RESPONSIVE TO DEHYDRATION 7, chloroplastic-like
LOC113736251	2.54800901772579	beta-amylase 1, chloroplastic-like
LOC113715518	2.54418014306085	alpha-galactosidase 1-like
LOC113738212	2.5409508993812	nuclear transcription factor Y subunit C-9-like isoform X2
LOC113694869	2.53407555675465	Unknown protein
LOC113734614	2.53079262385933	major allergen Pru ar 1-like
LOC113712000	2.52724966098532	protein PIN-LIKES 3-like
LOC113726488	2.52228580192206	uncharacterized protein At4g04775-like
LOC113699020	2.52210948165369	ACT domain-containing protein ACR1-like
LOC113706396	2.52163680062969	uncharacterized protein LOC113706396 isoform X2
LOC113725645	2.51720113905704	transcription factor DIVARICATA-like
LOC113718268	2.50982957222156	LOW QUALITY PROTEIN: sucrose synthase 2-like
LOC113725913	2.50813786240758	protein MOTHER of FT and TFL1 homolog 1-like
LOC113725148	2.50441886916517	beta-fructofuranosidase, soluble isoenzyme I-like isoform X2
LOC113716537	2.49503128338363	Unknown protein
LOC113712762	2.49108180215231	LOW QUALITY PROTEIN: uncharacterized protein LOC113712762
LOC113730185	2.48938818728333	heat shock 22 kDa protein, mitochondrial-like
LOC113702140	2.48418868092457	uncharacterized protein LOC113702140 isoform X2
LOC113698177	2.47976297859994	caffeoylshikimate esterase-like
LOC113715331	2.4721729394043	uncharacterized protein LOC113715331
LOC113699229	2.46355821208771	UDP-glycosyltransferase 74E2-like
LOC113701381	2.46336213772042	ACT domain-containing protein ACR1-like
LOC113690670	2.45037648349758	protein DETOXIFICATION 18-like isoform X2
LOC113743574	2.45037327121069	probable BOI-related E3 ubiquitin-protein ligase 3
LOC113716509	2.44768535465467	Unknown protein
LOC113697462	2.4443536768685	probable glutathione S-transferase
LOC113709456	2.44314657196807	WRKY transcription factor 28-like
LOC113734529	2.4404524187947	selenium-binding protein 1-like
LOC113712436	2.43738951723612	cytochrome P450 714C2-like
LOC113704386	2.43401184118148	heat shock protein 83-like
LOC113717955	2.4332415197697	ABC transporter C family member 14-like
LOC113697536	2.43054369907317	putative phytosulfokines 6
LOC113707992	2.42615138559122	aquaporin PIP2-2-like
LOC113714295	2.42159335015238	abscisic stress-ripening protein 5-like isoform X2
LOC113737984	2.42096649661559	major allergen Pru ar 1-like
LOC113713768	2.42033045231719	small ubiquitin-related modifier 1-like
LOC113740217	2.41821364148654	phosphatidylinositol 4-kinase gamma 7-like
LOC113690481	2.41738080450896	Unknown protein
LOC113695460	2.41326348418617	protein DOWNY MILDEW RESISTANCE 6-like
LOC113730063	2.40511640583286	oxalate--CoA ligase-like
LOC113713786	2.3980877491936	uncharacterized protein LOC113713786 isoform X1
LOC113694143	2.39579579210635	EG45-like domain containing protein
LOC113738366	2.39148718562553	hydrophobic protein LTI6A-like
LOC113712262	2.38865034957828	abscisic stress-ripening protein 2-like
LOC113703298	2.38483565293789	KAT8 regulatory NSL complex subunit 3-like
LOC113697228	2.38425053291225	probable galactinol--sucrose galactosyltransferase 2
LOC113712023	2.37647471292435	alpha-amylase-like
LOC113724957	2.37345466743564	heat shock protein 83-like
LOC113704105	2.3709095462732	aspartate aminotransferase, cytoplasmic
LOC113730706	2.36546064074864	receptor-like protein kinase FERONIA
LOC113699393	2.36467153992944	homeobox-leucine zipper protein HAT22-like
LOC113732321	2.36337738693658	desiccation-related protein PCC13-62-like
LOC113687568	2.35100867822441	uncharacterized protein At4g04980-like
LOC113704151	2.3429783211361	NDR1/HIN1-like protein 13
LOC113731063	2.32433050867767	U-box domain-containing protein 7-like
LOC113732906	2.32098974029565	uncharacterized protein LOC113732906 isoform X1
LOC113715533	2.31741021722467	ethylene-responsive transcription factor 12-like
LOC113712740	2.31667153362279	UDP-glycosyltransferase 74G1-like
LOC113695329	2.31542647554357	uncharacterized protein LOC113695329
LOC113731213	2.30779674994896	B-box zinc finger protein 18-like
LOC113689250	2.30594346685083	uncharacterized protein LOC113689250
LOC113689536	2.30250596262847	cytochrome P450 CYP72A219-like
LOC113708902	2.29802406280619	pterin-4-alpha-carbinolamine dehydratase 2, mitochondrial-like isoform X2
LOC113706964	2.29081255739835	B2 protein-like
LOC113700048	2.28878891668157	Unknown protein
LOC113736496	2.28235568436689	major allergen Pru ar 1-like isoform X1
LOC113736489	2.27100654763187	auxin-induced protein PCNT115-like
LOC113730421	2.26806607856826	18.2 kDa class I heat shock protein-like
LOC113707640	2.26083281272557	probable WRKY transcription factor 31
LOC113723990	2.25569398744055	probable magnesium transporter NIPA6 isoform X4
LOC113711806	2.25240433251359	abscisic stress-ripening protein 5-like
LOC113724958	2.2416546028395	elongation factor 1-beta 2-like
LOC113734385	2.2414912084806	beta-amylase 1, chloroplastic-like
LOC113714504	2.24080451157297	bZIP transcription factor 46-like
LOC113731182	2.23730061778233	uncharacterized protein LOC113731182 isoform X4
LOC113690255	2.23701854503375	anthocyanidin 3-O-glucosyltransferase 2-like
LOC113716392	2.23621393930318	UDP-glycosyltransferase 74B1
LOC113712167	2.23481197758461	LOW QUALITY PROTEIN: phosphoprotein ECPP44-like
LOC113740345	2.22457431296684	cytochrome P450 71A2-like
LOC113704395	2.22031917248351	mitogen-activated protein kinase kinase kinase 1-like
LOC113714662	2.21975897860573	zinc finger protein GAI-ASSOCIATED FACTOR 1-like
LOC113727959	2.21257643323864	cucumber peeling cupredoxin-like
LOC113698378	2.20934446077302	NDR1/HIN1-like protein 6
LOC113731904	2.20876325740729	WEB family protein At3g51220
LOC113699439	2.20112124843814	uncharacterized protein LOC113699439
LOC113706671	2.19707250972789	mitogen-activated protein kinase kinase kinase 1-like
LOC113726009	2.18147393036144	dnaJ protein homolog ANJ1
LOC113734640	2.17794220162661	ras-related protein RABA5c-like
LOC113728398	2.17689347730036	uncharacterized protein LOC113728398
LOC113695723	2.17589959981449	uncharacterized protein LOC113695723
LOC113734273	2.17477448345667	uncharacterized protein LOC113734273
LOC113730404	2.17251469822303	uncharacterized protein At2g39920 isoform X3
LOC113689858	2.1641087942708	LOW QUALITY PROTEIN: septum-promoting GTP-binding protein 1-like
LOC113725467	2.16371401720541	receptor-like cytoplasmic kinase 176 isoform X2
LOC113711139	2.16341894829508	LOW QUALITY PROTEIN: zinc finger protein ZAT10-like
LOC113739613	2.16265941410408	pyridoxal 5'-phosphate synthase-like subunit PDX1.2
LOC113735009	2.15983968051811	L-type lectin-domain containing receptor kinase IV.1-like
LOC113718664	2.15875297926491	ethylene-responsive transcription factor ABR1-like
LOC113738793	2.15821990033265	UDP-glycosyltransferase 74B1-like
LOC113697016	2.15709198842995	amino acid transporter AVT1A-like
LOC113701103	2.15638321974669	linamarin synthase 2-like
LOC113714415	2.15527748049782	Unknown protein
LOC113713734	2.15181423401002	heavy metal-associated isoprenylated plant protein 24-like
LOC113706610	2.15071128143174	uncharacterized protein LOC113706610
LOC113702180	2.14632467583101	non-specific lipid-transfer protein 2-like
LOC113739508	2.14074138483136	U-box domain-containing protein 19-like
LOC113728276	2.1389248590583	uncharacterized protein LOC113728276
LOC113727885	2.12914150987263	Unknown protein
LOC113743672	2.11125916849906	early nodulin-like protein 2 isoform X2
LOC113716203	2.10994698461152	E3 ubiquitin-protein ligase RHA2A-like
LOC113730852	2.10990343335184	protein HEAT-STRESS-ASSOCIATED 32-like
LOC113694639	2.10837571262637	polyubiquitin 3-like
LOC113712458	2.10749906962526	ent-kaurene oxidase, chloroplastic-like
LOC113730010	2.10635452614252	heat shock protein 83
LOC113730173	2.10439812138852	beta-fructofuranosidase, soluble isoenzyme I-like isoform X2
LOC113701838	2.09789132389595	pyridoxine/pyridoxamine 5'-phosphate oxidase 1, chloroplastic-like
LOC113699099	2.09718772151529	glutamate decarboxylase isoform X2
LOC113699192	2.09595965547768	RNA-binding protein 24-like isoform X6
LOC113736527	2.09311610244213	uncharacterized protein LOC113736527
LOC113734166	2.09258083166966	uncharacterized protein LOC113734166
LOC113711686	2.09249074779189	LOW QUALITY PROTEIN: mechanosensitive ion channel protein 8-like
LOC113704369	2.09060426424918	lipid transfer-like protein VAS
LOC113694739	2.08997879648628	1-aminocyclopropane-1-carboxylate oxidase homolog 4-like
LOC113724868	2.08994525218748	LOW QUALITY PROTEIN: uncharacterized protein LOC113724868
LOC113711777	2.08858921643073	hemiasterlin resistant protein 1-like
LOC113739759	2.08679228354882	G-type lectin S-receptor-like serine/threonine-protein kinase At1g11410
LOC113726990	2.08390358742284	protein PHLOEM PROTEIN 2-LIKE A1-like
LOC113730424	2.08283815180356	7-deoxyloganetic acid glucosyltransferase-like
LOC113719533	2.0807682227805	alpha-galactosidase 1-like
LOC113712497	2.0688835250793	cytokinin riboside 5'-monophosphate phosphoribohydrolase LOG1-like isoform X1
LOC113693589	2.06275868875913	protein ALP1-like
LOC113737042	2.05926940410802	uncharacterized protein LOC113737042
LOC113697014	2.05860304081665	uncharacterized protein LOC113697014 isoform X2
LOC113724831	2.054857556266	growth-regulating factor 8-like
LOC113698722	2.05404354026415	glutaredoxin-like
LOC113730861	2.05250336911087	U-box domain-containing protein 8-like
LOC113743014	2.05050519144673	NAP1-related protein 2-like
LOC113691442	2.04704584381146	LOW QUALITY PROTEIN: CBL-interacting serine/threonine-protein kinase 6-like
LOC113722535	2.04697755265376	abscisic acid 8'-hydroxylase 4-like
LOC113690058	2.04060997743884	amino acid transporter AVT1J-like
LOC113743711	2.03929915484056	cytochrome P450 CYP72A219-like isoform X6
LOC113731421	2.03718141636178	abscisic acid 8'-hydroxylase 4-like
LOC113706478	2.03535826618522	FBD-associated F-box protein At4g10400-like isoform X2
LOC113690029	2.03527560626142	anthocyanidin 3-O-glucosyltransferase 2-like
LOC113705404	2.03404553446837	receptor-like protein kinase HSL1
LOC113732671	2.03274281037977	uncharacterized protein LOC113732671
LOC113699332	2.03125930661317	GDT1-like protein 4 isoform X2
LOC113725388	2.02973415610331	cytochrome P450 89A2-like
LOC113718800	2.02752211197124	uncharacterized protein LOC113718800
LOC113692331	2.0194356010652	uncharacterized protein LOC113692331
LOC113725158	2.01605743818205	heat shock 22 kDa protein, mitochondrial-like
LOC113703263	2.0149796173185	14.7 kDa heat shock protein-like
LOC113742585	2.01392231841345	Unknown protein
LOC113708061	2.01256598725214	wall-associated receptor kinase-like 1
LOC113734176	2.00527572362657	early light-induced protein 2, chloroplastic-like isoform X1
LOC113689452	2.00360127047894	uncharacterized protein LOC113689452
LOC113700063	2.00146166689719	cinnamoyl-CoA reductase-like SNL6
LOC113709204	1.99864466548053	pterin-4-alpha-carbinolamine dehydratase 2, mitochondrial-like isoform X2
LOC113738809	1.99805806014631	single-stranded DNA-binding protein, mitochondrial-like
LOC113742762	1.99466620155113	cell division cycle protein 48 homolog
LOC113694054	1.98740434933282	protein TIFY 10A-like
LOC113741834	1.9830450912921	F-box/FBD/LRR-repeat protein At1g13570-like isoform X2
LOC113695265	1.97960994955778	UPF0481 protein At3g47200-like
LOC113692041	1.97842168737252	UPF0481 protein At3g47200-like
LOC113701605	1.97423868738703	Unknown protein
LOC113691879	1.97215755061632	IQ domain-containing protein IQM1-like isoform X2
LOC113694934	1.9702190534678	probable protein phosphatase 2C 4
LOC113740041	1.96811003098748	uncharacterized protein LOC113740041 isoform X3
LOC113727685	1.9627945861881	serine/arginine-rich splicing factor SR30-like
LOC113689733	1.95610732954659	anthocyanidin 3-O-glucosyltransferase 2-like
LOC113717339	1.95457666531273	probable indole-3-pyruvate monooxygenase YUCCA10
LOC113726124	1.94523375925379	uncharacterized protein LOC113726124
LOC113691391	1.94453390842607	synaptotagmin-5-like
LOC113700071	1.9432618562639	elongator complex protein 5-like
LOC113732937	1.94237896192035	uncharacterized protein LOC113732937
LOC113717887	1.94172049232292	uncharacterized protein LOC113717887
LOC113725865	1.93596686323708	protein HEAT-STRESS-ASSOCIATED 32-like
LOC113706616	1.93447551748408	Unknown protein
LOC113708969	1.93375252510788	WD-40 repeat-containing protein MSI2-like
LOC113690394	1.93024078583261	homogentisate 1,2-dioxygenase
LOC113728161	1.92159446975441	transcriptional activator TAF-1-like isoform X4
LOC113694620	1.91894018336392	calcium-transporting ATPase 10, plasma membrane-type-like
LOC113697856	1.91387982397379	gibberellin 20 oxidase 2-like
LOC113734468	1.91215463036741	probable 2-oxoglutarate-dependent dioxygenase AOP1
LOC113701412	1.90986514293398	potassium channel SKOR-like isoform X1
LOC113705654	1.90920228307551	putative RING-H2 finger protein ATL21A
LOC113698188	1.90325404828394	Unknown protein
LOC113740330	1.90099219165562	NAP1-related protein 2-like
LOC113729967	1.8937372215993	probable inactive receptor kinase At4g23740
LOC113691917	1.89299086123528	uncharacterized protein LOC113691917
LOC113715154	1.89009324416536	F-box protein SKP2A-like
LOC113740435	1.88954731844939	uncharacterized protein LOC113740435 isoform X2
LOC113725255	1.8831848790014	methylesterase 17
LOC113721452	1.88238017587873	uncharacterized protein LOC113721452
LOC113736838	1.88167367888022	nuclear poly(A) polymerase 3 isoform X4
LOC113740490	1.87556879566292	hydroxymethylglutaryl-CoA lyase, mitochondrial-like
LOC113734564	1.86971955706442	glycine-rich cell wall structural protein-like
LOC113731184	1.86947439837571	aquaporin-like
LOC113691742	1.8677124803356	heme-binding-like protein At3g10130, chloroplastic
LOC113691481	1.8667078340608	Unknown protein
LOC113743195	1.86657122227688	grpE protein homolog 1, mitochondrial-like isoform X2
LOC113741763	1.86578799203166	17.4 kDa class III heat shock protein-like
LOC113726050	1.86476154216579	ethylene-responsive transcription factor 4-like
LOC113700199	1.85737386648696	aspartyl protease family protein 1-like isoform X1
LOC113730972	1.85332949546081	probable 2-carboxy-D-arabinitol-1-phosphatase
LOC113718674	1.85201857664646	protein DETOXIFICATION 16-like isoform X2
LOC113704377	1.84967988000819	LOW QUALITY PROTEIN: uncharacterized protein LOC113704377
LOC113705591	1.84625439030414	ubiquitin carboxyl-terminal hydrolase 3-like isoform X2
LOC113692233	1.84603839668925	uncharacterized protein LOC113692233 isoform X3
LOC113697396	1.84591023362478	CBL-interacting serine/threonine-protein kinase 6-like
LOC113704059	1.84109329326629	uncharacterized protein LOC113704059
LOC113689879	1.84058911984023	elongation factor Ts, mitochondrial isoform X2
LOC113738724	1.83948126203883	Unknown protein
LOC113734267	1.83884945441821	1-aminocyclopropane-1-carboxylate oxidase homolog 1-like
LOC113691694	1.83158502000006	heat shock factor protein HSF30-like
LOC113732887	1.83052964736209	serine/arginine-rich splicing factor SR30-like
LOC113741511	1.82506380507175	nuclear transcription factor Y subunit A-6
LOC113698700	1.82418834845254	ent-kaur-16-ene synthase, chloroplastic-like isoform X2
LOC113727812	1.82323134486911	transcription factor bHLH149-like
LOC113716946	1.82322570337664	RNA demethylase ALKBH10B-like
LOC113717254	1.81994813950335	CDP-diacylglycerol--serine O-phosphatidyltransferase 1-like isoform X2
LOC113705425	1.81903106609637	exosome complex exonuclease RRP46 homolog
LOC113743459	1.8186819457743	uncharacterized protein LOC113743459 isoform X3
LOC113692617	1.81778868531378	dynein light chain 1, cytoplasmic-like
LOC113698067	1.81688957893523	uncharacterized protein LOC113698067
LOC113740371	1.81559147311945	protein PLASTID TRANSCRIPTIONALLY ACTIVE 10
LOC113726128	1.81258100686121	sinapine esterase-like isoform X5
LOC113743059	1.81051755077543	phosphomethylethanolamine N-methyltransferase-like
LOC113731398	1.81004993286685	2-hydroxyisoflavanone dehydratase-like
LOC113707198	1.80805838345529	aspartate aminotransferase, cytoplasmic-like
LOC113714981	1.8048671010465	uncharacterized protein LOC113714981
LOC113710731	1.80282295135463	WD-40 repeat-containing protein MSI2-like
LOC113702228	1.80260691819165	serine carboxypeptidase-like 2 isoform X1
LOC113694515	1.80256918668594	calmodulin-binding protein 25-like
LOC113736622	1.79772983881293	uncharacterized protein LOC113736622
LOC113740171	1.79770106383092	chaperone protein ClpB1-like
LOC113695916	1.79241518108817	serine/threonine-protein kinase D6PKL2-like
LOC113699138	1.78808903879418	GDSL esterase/lipase At3g27950-like
LOC113719097	1.78747537926111	Unknown protein
LOC113706341	1.7811736430252	glutathione S-transferase T1-like
LOC113702728	1.78006800050758	F-box protein SKIP31-like isoform X2
LOC113742844	1.77927148363552	protein NUCLEAR FUSION DEFECTIVE 4-like
LOC113698999	1.77850927123534	cyclic dof factor 2-like isoform X2
LOC113704228	1.7775902257287	uncharacterized protein LOC113704228 isoform X2
LOC113690998	1.77635390520518	thiamine thiazole synthase, chloroplastic-like
LOC113688344	1.77405561353926	transcription elongation factor 1 homolog
LOC113692078	1.77005578767772	replication protein A 14 kDa subunit B-like isoform X2
LOC113718825	1.7689847017368	tetraketide alpha-pyrone reductase 2-like
LOC113697153	1.76758176890241	transcription factor bHLH66-like
LOC113703071	1.76625078218378	RNA polymerase II transcriptional coactivator KELP-like
LOC113733142	1.76522433796251	(+)-neomenthol dehydrogenase-like isoform X1
LOC113712787	1.76487866841041	F-box protein SKP2A-like
LOC113731676	1.76094683178827	serine/arginine-rich splicing factor SC35-like
LOC113698375	1.76075695281181	E3 ubiquitin-protein ligase RHA2B-like
LOC113695766	1.75996602886143	MAPK kinase substrate protein At1g80180-like
LOC113716920	1.75703362263728	fructose-bisphosphate aldolase 3, chloroplastic
LOC113735478	1.75306110162347	putative F-box protein PP2-B12
LOC113697405	1.752563723339	protein SRC1-like
LOC113705332	1.74927783552506	uncharacterized protein LOC113705332 isoform X2
LOC113687987	1.74842680349721	protein DJ-1 homolog A-like
LOC113733919	1.74837252488302	major allergen Pru ar 1-like
LOC113730479	1.74743494177134	receptor-like cytoplasmic kinase 176 isoform X1
LOC113742616	1.74628981713479	chaperone protein ClpB1
LOC113742464	1.74470556154439	aldehyde dehydrogenase family 7 member B4-like
LOC113691474	1.74409740895288	uncharacterized protein LOC113691474
LOC113708601	1.74367924404019	uncharacterized protein LOC113708601
LOC113699849	1.74010356360971	uncharacterized protein LOC113699849
LOC113734099	1.73928960804731	putative methyltransferase C9orf114 homolog isoform X2
LOC113712750	1.73756858015022	mitogen-activated protein kinase kinase kinase 5-like
LOC113693625	1.73466014467375	GTP-binding nuclear protein Ran1A-like
LOC113738034	1.73346698189115	flowering time control protein FCA-like isoform X2
LOC113739654	1.73255472767776	17.4 kDa class III heat shock protein-like
LOC113700422	1.72995599059851	uncharacterized protein LOC113700422
LOC113701092	1.7271798177988	U3 small nucleolar ribonucleoprotein protein IMP3-like
LOC113707169	1.72640239820641	lipid transfer-like protein VAS
LOC113707055	1.72529134689002	uncharacterized protein LOC113707055
LOC113712533	1.72519488756441	serpin-ZX-like
LOC113734248	1.72463227417202	1-aminocyclopropane-1-carboxylate oxidase homolog 11-like
LOC113690152	1.72456656446031	probable serine/threonine-protein kinase WNK11 isoform X4
LOC113733423	1.72362390365888	ent-copalyl diphosphate synthase, chloroplastic-like
LOC113703054	1.72140602004089	zinc finger A20 and AN1 domain-containing stress-associated protein 1-like
LOC113711339	1.71893882288664	probable protein phosphatase 2C 25
LOC113733986	1.71866434000949	uncharacterized protein LOC113733986
LOC113691712	1.71650893748468	calcium-transporting ATPase 10, plasma membrane-type-like isoform X2
LOC113702959	1.71069491907445	uncharacterized protein LOC113702959
LOC113705431	1.70933896982982	RNA polymerase II transcriptional coactivator KELP-like
LOC113695291	1.70719977060978	heme-binding-like protein At3g10130, chloroplastic
LOC113711157	1.70558777629564	uncharacterized protein LOC113711157
LOC113713242	1.70167119945774	classical arabinogalactan protein 5-like
LOC113702710	1.7009703294407	putative RING-H2 finger protein ATL21A
LOC113694569	1.7003742498156	universal stress protein PHOS32-like
LOC113714647	1.69257306205803	serpin-ZX-like
LOC113690992	1.69225001450675	protein translation factor SUI1 homolog
LOC113741818	1.68968032577166	LOW QUALITY PROTEIN: polynucleotide 5'-hydroxyl-kinase NOL9
LOC113728060	1.68938356012268	uncharacterized protein LOC113728060
LOC113726435	1.68819011395816	ABSCISIC ACID-INSENSITIVE 5-like protein 7 isoform X2
LOC113692559	1.68740079536916	peroxidase 16-like
LOC113716095	1.68305486664547	Unknown protein
LOC113705049	1.6829119890996	dnaJ protein homolog ANJ1-like
LOC113694164	1.67913636367546	protein SRC1-like
LOC113698610	1.67715335070787	ent-kaur-16-ene synthase, chloroplastic-like
LOC113702162	1.67601378410627	cytochrome P450 81E8-like
LOC113700179	1.67552049913233	uncharacterized protein LOC113700179 isoform X1
LOC113716385	1.67072875962495	amino acid transporter AVT6A-like
LOC113730770	1.66971699542912	uncharacterized protein LOC113730770
LOC113724833	1.66711438715473	GRF1-interacting factor 2-like
LOC113734239	1.66485831508965	cellulose synthase A catalytic subunit 7 [UDP-forming
LOC113690438	1.66138115913818	transcription elongation factor 1 homolog
LOC113728228	1.66039184252832	LOW QUALITY PROTEIN: L-ascorbate peroxidase 2, cytosolic-like
LOC113742681	1.65896714883304	pyridoxal 5'-phosphate synthase-like subunit PDX1.2
LOC113743525	1.65582217887896	metal tolerance protein 9-like isoform X3
LOC113729882	1.65574976478211	probable 6-phosphogluconolactonase 4, chloroplastic
LOC113698149	1.6554566588243	microsomal glutathione S-transferase 3-like
LOC113696044	1.65430194024942	uncharacterized protein LOC113696044
LOC113734656	1.65397689812617	auxin-induced protein PCNT115-like
LOC113727364	1.6529898161552	ABC transporter F family member 1-like
LOC113742500	1.65285493556834	aldehyde dehydrogenase family 7 member B4-like
LOC113691940	1.64928689679134	uncharacterized protein At4g29660
LOC113705444	1.64825883799491	heat stress transcription factor B-2b-like
LOC113730137	1.64438458219574	CDGSH iron-sulfur domain-containing protein NEET-like isoform X2
LOC113693817	1.64425628497247	protein phosphatase 2C 50-like
LOC113694130	1.63486008563518	prostatic spermine-binding protein-like
LOC113731163	1.63231108598615	WRKY transcription factor WRKY24-like
LOC113692133	1.63216252941484	uncharacterized protein LOC113692133
LOC113691751	1.6321024430746	double-stranded RNA-binding protein 1-like
LOC113707006	1.63209073898978	Unknown protein
LOC113693656	1.63132425320302	uncharacterized protein LOC113693656 isoform X3
LOC113733044	1.63068481602781	Unknown protein
LOC113725942	1.62900193780052	ATP-dependent RNA helicase A-like
LOC113694114	1.6285470187249	NDR1/HIN1-like protein 3
LOC113718216	1.62752385131	protein SENESCENCE-ASSOCIATED GENE 21, mitochondrial-like
LOC113718996	1.62561515143758	putative polyol transporter 1
LOC113728158	1.62549469625386	eukaryotic translation initiation factor 1A
LOC113717457	1.62518414848122	zinc finger protein CONSTANS-LIKE 13-like
LOC113733168	1.62414044350058	uncharacterized protein LOC113733168
LOC113701208	1.62233932036009	caffeoylshikimate esterase-like
LOC113742570	1.62211065060134	E3 ubiquitin-protein ligase KEG-like
LOC113724785	1.62060912505069	uncharacterized protein At2g24330-like
LOC113703985	1.62040098190739	probable E3 ubiquitin-protein ligase RHB1A
LOC113705691	1.6197453752393	Unknown protein
LOC113734622	1.61867837371852	probable aldo-keto reductase 2
LOC113695359	1.61794278387477	RING-H2 finger protein ATL33
LOC113704115	1.61733194153017	glycine-rich protein A3-like
LOC113693566	1.61489988755164	transcription factor bHLH66-like
LOC113730072	1.61410584486847	heavy metal-associated isoprenylated plant protein 39-like isoform X2
LOC113704067	1.61406446845665	ubiquitin carboxyl-terminal hydrolase 3-like
LOC113687757	1.61307747943992	protein arginine methyltransferase NDUFAF7 homolog, mitochondrial-like isoform X2
LOC113741307	1.61072049377401	protein CHUP1, chloroplastic
LOC113692573	1.60934675400343	xylose isomerase-like
LOC113713065	1.60925046603886	protein PEP-RELATED DEVELOPMENT ARRESTED 1, chloroplastic-like
LOC113717797	1.60763947196538	putative caffeoyl-CoA O-methyltransferase At1g67980
LOC113739380	1.6070785330579	galactoside 2-alpha-L-fucosyltransferase-like
LOC113695337	1.60656274938421	uncharacterized protein LOC113695337
LOC113743707	1.60428855544561	glutaredoxin-C9-like
LOC113736733	1.60225102534659	probable hydroxyacylglutathione hydrolase 2, chloroplastic isoform X2
LOC113688291	1.6008969625649	nitrile-specifier protein 5-like
LOC113709737	1.60082822094853	exosome complex component csl4 isoform X2
LOC113715786	1.60040897753403	protein DETOXIFICATION 16-like isoform X2
LOC113695315	1.59992547025719	replication protein A 14 kDa subunit B-like
LOC113736371	1.59602068351394	glycine-rich RNA-binding protein 4, mitochondrial-like
LOC113726763	1.5925545427897	Unknown protein
LOC113716753	1.5883573592921	protein EARLY-RESPONSIVE TO DEHYDRATION 7, chloroplastic-like
LOC113708595	1.58601012680686	L-ascorbate peroxidase, cytosolic-like
LOC113725872	1.5859923390454	pentatricopeptide repeat-containing protein At1g55890, mitochondrial-like
LOC113735307	1.58172866534813	alkaline/neutral invertase A, mitochondrial-like
LOC113718722	1.58133138216818	uncharacterized protein LOC113718722
LOC113702685	1.57762082929973	uncharacterized protein LOC113702685
LOC113691282	1.5746941495901	uncharacterized protein LOC113691282
LOC113690330	1.57262442472597	multiple organellar RNA editing factor 8, chloroplastic/mitochondrial-like
LOC113732934	1.57250159595822	dnaJ homolog subfamily B member 8-like
LOC113717926	1.56869402119303	probable carboxylesterase 16
LOC113695186	1.56619048115109	probable plastidic glucose transporter 2
LOC113693769	1.5654855427003	uncharacterized protein LOC113693769
LOC113689446	1.56275115794796	B-box domain protein 31-like
LOC113693871	1.56179017878544	uncharacterized protein LOC113693871
LOC113740226	1.55837873841454	uncharacterized protein LOC113740226
LOC113712489	1.55704982620255	zinc finger protein GAI-ASSOCIATED FACTOR 1-like
LOC113689804	1.55236233156734	glycine-rich RNA-binding protein 4, mitochondrial-like isoform X2
LOC113730952	1.55136544190739	putative serine/threonine-protein kinase
LOC113712187	1.5496622153199	uncharacterized protein LOC113712187 isoform X2
LOC113711641	1.5486820615359	gamma-interferon-responsive lysosomal thiol protein-like isoform X1
LOC113705212	1.54839983005184	probable phospholipid hydroperoxide glutathione peroxidase
LOC113694025	1.54789050961817	mitochondrial carrier protein CoAc2-like
LOC113724937	1.54554467295541	plastidial pyruvate kinase 2-like
LOC113714613	1.54476230373743	GEM-like protein 1
LOC113706761	1.54037908895395	uncharacterized protein LOC113706761
LOC113690157	1.53943241687461	uncharacterized protein LOC113690157
LOC113692232	1.53900954297309	heat stress transcription factor C-1
LOC113691037	1.53830725924629	uncharacterized protein LOC113691037 isoform X2
LOC113688299	1.53820708905475	tabersonine 16-hydroxylase 1-like
LOC113717010	1.53690391962133	uncharacterized protein LOC113717010 isoform X3
LOC113726576	1.53632820813266	nicotinamidase 2-like
LOC113696283	1.53454134473167	GTP-binding nuclear protein Ran1A
LOC113732719	1.53431248280061	uncharacterized protein LOC113732719
LOC113707272	1.53253761911222	ABC transporter F family member 1-like
LOC113702149	1.53025903996514	probable isoprenylcysteine alpha-carbonyl methylesterase ICMEL2
LOC113743184	1.52897849474461	two pore calcium channel protein 1B-like isoform X2
LOC113732228	1.52582684738705	cathepsin B-like protease 3
LOC113739605	1.52247215063388	uncharacterized protein LOC113739605 isoform X1
LOC113712050	1.52098651117784	CBL-interacting serine/threonine-protein kinase 11
LOC113708715	1.51992076535384	uncharacterized protein LOC113708715
LOC113705626	1.51865439052743	uncharacterized protein LOC113705626
LOC113709606	1.51686134218874	7-deoxyloganetic acid glucosyltransferase-like
LOC113743506	1.51671235628394	small ubiquitin-related modifier 1-like
LOC113716873	1.51529860238357	major allergen Pru ar 1-like
LOC113726287	1.51317459657438	phosphatidylinositol/phosphatidylcholine transfer protein SFH3-like isoform X1
LOC113704110	1.50934433269403	UDP-glycosyltransferase 92A1-like
LOC113736452	1.50808188317546	probable UDP-N-acetylglucosamine--peptide N-acetylglucosaminyltransferase SEC
LOC113724013	1.50458004156436	uncharacterized protein LOC113724013
LOC113708966	1.50421040343602	ATP-dependent 6-phosphofructokinase 2
LOC113698179	1.50105330026817	U3 small nucleolar ribonucleoprotein protein IMP3-like
LOC113725796	1.50080025322303	splicing factor ESS-2 homolog
LOC113733104	1.49631517238277	ribosomal lysine N-methyltransferase set10-like
LOC113734229	1.49523739895981	DNA repair protein XRCC4-like
LOC113702480	1.49331298669273	glutamate decarboxylase-like
LOC113729937	1.49152099261139	phosphatidylinositol 4-kinase gamma 3-like
LOC113693985	1.49150048200794	B3 domain-containing protein At2g36080-like isoform X1
LOC113707399	1.4911468903916	tetraspanin-10-like isoform X2
LOC113738141	1.49112159493418	inactive beta-amylase 9
LOC113736989	1.49091652910646	mitochondrial proton/calcium exchanger protein-like
LOC113709635	1.4902904782635	fumarylacetoacetase-like
LOC113710551	1.4901209188881	coiled-coil domain-containing protein 124-like
LOC113730969	1.48917758451601	E3 ubiquitin-protein ligase RMA1H1-like
LOC113698415	1.48831034763149	TMV resistance protein N-like
LOC113697015	1.48827064179178	amino acid transporter AVT1A-like isoform X2
LOC113704079	1.48733052848976	ethylene-responsive transcription factor RAP2-12-like
LOC113735267	1.48716796057744	sucrose synthase 2-like
LOC113707250	1.48616243498061	glycine-rich protein A3-like isoform X2
LOC113732740	1.48581816046715	histone H2AX-like
LOC113694568	1.48409896411245	probable proteasome inhibitor
LOC113716363	1.48369491415906	14-3-3-like protein
LOC113699274	1.48317220612518	LOW QUALITY PROTEIN: FACT complex subunit SSRP1-like
LOC113741415	1.48089007631854	H/ACA ribonucleoprotein complex subunit 2-like protein
LOC113709536	1.48022449595641	thioredoxin-like 1-1, chloroplastic
LOC113696176	1.47959898284895	NADP-dependent glyceraldehyde-3-phosphate dehydrogenase-like
LOC113708909	1.47842409148032	thioredoxin-like 1-1, chloroplastic
LOC113731924	1.47817700561521	Unknown protein
LOC113730718	1.47444090881626	OTU domain-containing protein At3g57810-like
LOC113688924	1.47327456754451	two pore calcium channel protein 1B-like isoform X2
LOC113704261	1.47279867382643	uncharacterized protein LOC113704261
LOC113697052	1.46785166222651	histone H2A.V-like isoform X1
LOC113697541	1.46701558080344	remorin 4.1-like
LOC113729845	1.46032330393971	protein NTM1-like 9 isoform X2
LOC113730236	1.45867499086976	Unknown protein
LOC113734084	1.45647872778239	nuclear transcription factor Y subunit C-9-like isoform X2
LOC113732077	1.45625703028938	NADH dehydrogenase [ubiquinone
LOC113693647	1.4561205676995	NADP-dependent glyceraldehyde-3-phosphate dehydrogenase-like
LOC113713062	1.45545562152208	subtilisin-like protease SBT3.5 isoform X1
LOC113736588	1.45363591095541	LOW QUALITY PROTEIN: early light-induced protein 2, chloroplastic-like
LOC113718954	1.44839655169063	receptor-like protein EIX2 isoform X2
LOC113712128	1.44616102048954	Unknown protein
LOC113694209	1.44560680734221	probable small nuclear ribonucleoprotein G
LOC113699994	1.44404369600823	protein AAR2 homolog isoform X2
LOC113707236	1.4407299316983	4-coumarate--CoA ligase-like 7
LOC113690615	1.44041507393627	purine permease 3-like
LOC113731781	1.44008792700802	long-chain-alcohol O-fatty-acyltransferase-like
LOC113711391	1.43653490465577	Unknown protein
LOC113707215	1.4363411086974	lactoylglutathione lyase-like isoform X2
LOC113703566	1.43589262376589	ATP-dependent 6-phosphofructokinase 6-like isoform X1
LOC113730981	1.43341202029076	gamma-interferon-responsive lysosomal thiol protein-like isoform X1
LOC113742142	1.43332613156091	pleiotropic drug resistance protein 1-like
LOC113742188	1.43182372713817	homeobox-leucine zipper protein HAT5-like
LOC113727080	1.43135674910114	aspartic proteinase-like protein 2
LOC113710328	1.43070554038231	la-related protein 6A-like
LOC113706735	1.42965962229638	UDP-glucose 4-epimerase GEPI48-like
LOC113693582	1.42242308688715	ricin B-like lectin R40G3
LOC113732870	1.42137031432909	stress-related protein-like
LOC113692811	1.42130697313975	Unknown protein
LOC113724826	1.420390228738	Unknown protein
LOC113719240	1.41918462028664	PLASMODESMATA CALLOSE-BINDING PROTEIN 3-like
LOC113717704	1.41195537989651	1-aminocyclopropane-1-carboxylate oxidase homolog 3-like isoform X1
LOC113726060	1.41053985734492	protein NUCLEAR FUSION DEFECTIVE 6, chloroplastic/mitochondrial-like isoform X3
LOC113694989	1.41046760733875	uncharacterized protein LOC113694989
LOC113696275	1.40858291158403	Unknown protein
LOC113693394	1.40822608691796	F-box protein At5g07610-like
LOC113742607	1.40784448402991	trihelix transcription factor ASIL2-like
LOC113692847	1.40531673003294	uncharacterized protein LOC113692847
LOC113701853	1.40501288299239	probable nucleolar protein 5-2
LOC113718258	1.4046287176716	uncharacterized protein LOC113718258
LOC113693844	1.40131285628538	tetraspanin-2
LOC113691562	1.40040912281385	organic cation/carnitine transporter 7-like
LOC113704051	1.39870560883726	tetraspanin-10-like isoform X2
LOC113725434	1.39302205831412	protein phosphatase 2C 37-like
LOC113700642	1.3899028291509	uncharacterized protein LOC113700642
LOC113690088	1.38983503329662	mitogen-activated protein kinase 20
LOC113732375	1.38892272245097	ylmG homolog protein 1-2, chloroplastic-like
LOC113702423	1.3877445224695	uncharacterized protein LOC113702423
LOC113718136	1.38751568555339	60S ribosomal protein L22-2-like
LOC113719055	1.38633144582677	PSME3-interacting protein-like isoform X2
LOC113688431	1.38535595117564	dynein light chain 2, cytoplasmic
LOC113717989	1.38242303733517	14-3-3-like protein GF14-E
LOC113694284	1.37584886103997	calmodulin-binding protein 25-like
LOC113730505	1.37360728548178	heat shock cognate 70 kDa protein 2-like
LOC113691360	1.37283806218234	zinc finger A20 and AN1 domain-containing stress-associated protein 4-like
LOC113731545	1.36699372958237	probable zinc metallopeptidase EGY3, chloroplastic
