# Supplementary material for: Overexpression of Water-Responsive Genes Promoted by Elevated CO2 Reduces ROS and Enhances Drought Tolerance in Coffea Species
Source: Int J Mol Sci. 2023 Feb 6;24(4):3210. doi: 10.3390/ijms24043210 (PMC9966387; doi:10.3390/ijms24043210)
Supplement: Supplementary file 1 [file ijms-24-03210-s001.zip › Table_S5.xlsx]

## Sheet: MWD_vs_WW_aCO2_down
Gene ID	TID	Log2FC	Protein Name
Cc08_g07750	GSCOC_T00011866001	-7.70543046529227	Hypothetical protein
Cc06_g18640	GSCOC_T00040488001	-6.92876224171497	Putative methyltransferase DDB_G0268948
Cc11_g16640	GSCOC_T00038205001	-5.6154824776015	Remorin family protein
Cc04_g10190	GSCOC_T00042560001	-5.02527776079991	Hypothetical protein
Cc05_g07600	GSCOC_T00016754001	-4.76146257406635	Tyrosine aminotransferase
Cc10_g11120	GSCOC_T00016685001	-4.44257387813387	Auxin transporter-like protein 5
Cc00_g26150	GSCOC_T00004175001	-4.29734964157964	Putative BURP domain-containing protein 5
Cc11_g13700	GSCOC_T00032149001	-4.14813350110435	Glutathione S-transferase U17
Cc01_g16160	GSCOC_T00016474001	-4.04566576548032	Putative unknown protein; BEST Arabidopsis thaliana protein match is
Cc05_g04800	GSCOC_T00035016001	-3.90918515192698	Putative Protein TRANSPARENT TESTA 12
Cc03_g11350	GSCOC_T00000035001	-3.47035133955084	Purine permease 3
Cc01_g18330	GSCOC_T00016218001	-3.27019159976007	Putative unknown protein; FUNCTIONS IN
Cc02_g06310	GSCOC_T00039158001	-3.18822903023611	Putative Vinorine synthase
Cc04_g11500	GSCOC_T00037341001	-3.12052092032719	Tropinone reductase homolog At1g07440
Cc11_g11720	GSCOC_T00032409001	-3.04489525045665	MADS-box protein CMB1
Cc03_g09720	GSCOC_T00030959001	-2.96832962120154	Probable aldo-keto reductase 2
Cc00_g16260	GSCOC_T00011524001	-2.83442360122186	Hypothetical protein
Cc10_g04900	GSCOC_T00034879001	-2.68025701004494	Probable isoaspartyl peptidase/L-asparaginase 2
Cc06_g03370	GSCOC_T00023618001	-2.64066638420493	Protein IN2-1 homolog B
Cc08_g09890	GSCOC_T00026943001	-2.61788249625638	Histidine-containing phosphotransfer protein 4
Cc08_g05750	GSCOC_T00024364001	-2.60129835862299	Hypothetical protein
Cc01_g14140	GSCOC_T00028405001	-2.53520448081465	Ammonium transporter 1 member 3
Cc00_g00450	GSCOC_T00036131001	-2.24688716483911	Putative Arginine decarboxylase

## Sheet: MWD_vs_WW_aCO2_up
Gene ID	TID	Log2FC	Protein Name
Cc02_g29220	GSCOC_T00004501001	7.94568487306586	Putative Cytochrome P450 750A1
Cc05_g05900	GSCOC_T00035177001	7.87924251869231	Putative myb domain protein 15
Cc10_g06020	GSCOC_T00034723001	6.31855879670857	Putative Predicted protein
Cc02_g03240	GSCOC_T00020200001	6.29470335585828	CEN-like protein 1
Cc01_g10050	GSCOC_T00024084001	6.03690188278679	Agmatine coumaroyltransferase-2
Cc00_g01970	GSCOC_T00000819001	5.75350341151393	Putative Protein TIFY 5A
Cc05_g13870	GSCOC_T00021007001	4.84139264995989	Putative Protein of unknown function, DUF584
Cc00_g03120	GSCOC_T00003068001	4.81694632678171	Putative Annexin D4
Cc10_g08670	GSCOC_T00034360001	4.62487860091297	Putative Protein of unknown function (DUF1442)
Cc01_g04030	GSCOC_T00040852001	4.4263790862089	Putative G-type lectin S-receptor-like serine/threonine-protein kinase RLK1
Cc10_g06840	GSCOC_T00034605001	4.40882901751143	Phosphate-responsive 1 family protein
Cc02_g17700	GSCOC_T00014292001	4.38413811837711	Putative unknown seed protein like 1
Cc04_g03290	GSCOC_T00022022001	4.30368957738918	Putative Acid phosphatase 1
Cc06_g02310	GSCOC_T00023485001	4.1778959593101	Putative Protein of unknown function (DUF668)
Cc06_g04680	GSCOC_T00042986001	4.16325276376373	UDP-glycosyltransferase 73D1
Cc03_g04820	GSCOC_T00026212001	4.03909376848534	Basic helix-loop-helix protein
Cc01_g15540	GSCOC_T00016549001	3.93154984427404	Putative cytochrome P450, family 714, subfamily A, polypeptide 1
Cc07_g00660	GSCOC_T00019144001	3.89545819785374	Calcium-binding protein CML38
Cc02_g06430	GSCOC_T00039176001	3.82556169297154	Putative Leucoanthocyanidin dioxygenase
Cc09_g04290	GSCOC_T00017445001	3.77896751771778	Acetolactate synthase small subunit
Cc07_g02770	GSCOC_T00039483001	3.76202715607538	Probable galacturonosyltransferase-like 9
Cc02_g33320	GSCOC_T00015359001	3.69192690450006	Probable linoleate 9S-lipoxygenase 5
Cc04_g02600	GSCOC_T00021935001	3.58427974844379	Pleiotropic drug resistance protein 12
Cc07_g07330	GSCOC_T00040079001	3.54869228409317	Putative basic leucine-zipper 6
Cc03_g03600	GSCOC_T00026053001	3.48444874962261	Putative Uncharacterized protein C24B11.05
Cc00_g25930	GSCOC_T00006248001	3.42301434863667	Phosphate-responsive 1 family protein
Cc08_g02570	GSCOC_T00037734001	3.40049244483429	unknown protein; Has 39 Blast hits to 39 proteins in 10 species
Cc00_g33450	GSCOC_T00007482001	3.29794771058101	Hypothetical protein
Cc05_g12520	GSCOC_T00021180001	3.28922522677459	Hypothetical protein
Cc04_g06360	GSCOC_T00022422001	3.2688552772148	Calcium-binding allergen Ole e 8
Cc03_g14330	GSCOC_T00031831001	3.08017515591823	Hypothetical protein
Cc11_g09100	GSCOC_T00032782001	2.94154707268811	Putative unknown protein; FUNCTIONS IN
Cc04_g03300	GSCOC_T00022023001	2.91416182944427	Putative Acid phosphatase 1
Cc07_g20610	GSCOC_T00007209001	2.91164068910644	Putative Subtilisin-like protease
Cc04_g14210	GSCOC_T00035952001	2.8892377503273	Probable boron transporter 2
Cc07_g15370	GSCOC_T00036484001	2.63944099871722	Lipase/lipooxygenase, PLAT/LH2 family protein
Cc05_g11000	GSCOC_T00021370001	2.63691078283171	Putative Pathogen-related protein
Cc01_g18370	GSCOC_T00016214001	2.60810347147798	Putative myb domain protein 15
Cc04_g13140	GSCOC_T00018883001	2.60235570677947	Putative UDP-glycosyltransferase 83A1
Cc04_g15770	GSCOC_T00042356001	2.54652821756322	Probable peptide/nitrate transporter At5g62680
Cc01_g15550	GSCOC_T00016548001	2.43977660844678	Putative Cytochrome P450 734A6
Cc04_g01080	GSCOC_T00021740001	2.40969337698029	Putative Protein TIFY 10B
Cc08_g07740	GSCOC_T00011862001	2.40283888483803	Hypothetical protein
Cc02_g12320	GSCOC_T00029299001	2.30524865548864	Protein MOTHER of FT and TF 1
Cc04_g09860	GSCOC_T00042517001	2.27580145474606	HVA22-like protein d
Cc06_g08980	GSCOC_T00041979001	2.26202270414039	Putative unknown protein; BEST Arabidopsis thaliana protein match is

## Sheet: MWD_vs_WW_eCO2_down
Gene ID	TID	Log2FC	Protein Name
Cc03_g09010	GSCOC_T00042727001	-4.18438410619567	Putative CYC02 protein
Cc02_g16790	GSCOC_T00014174001	-3.91852967635654	Auxin-induced protein 15A
Cc02_g13680	GSCOC_T00029115001	-3.01574642662087	Putative Ethylene-responsive transcription factor 12
Cc03_g09500	GSCOC_T00030930001	-2.71802794249114	Hypothetical protein

## Sheet: MWD_vs_WW_eCO2_up
Gene ID	TID	Log2FC	Protein Name
Cc10_g12380	GSCOC_T00031944001	6.17305087834776	Putative ABC transporter C family member 9
Cc01_g03760	GSCOC_T00040931001	6.13774528471172	Putative Cytochrome P450 81D1
Cc06_g19900	GSCOC_T00022873001	5.31757368775258	Putative 3-oxoacyl-[acyl-carrier-protein] reductase FabG
Cc02_g32030	GSCOC_T00018911001	3.84963483356893	Putative Probable serine/threonine-protein kinase Cx32, chloroplastic
Cc00_g27860	GSCOC_T00012524001	3.79768368818789	Putative 3-oxoacyl-[acyl-carrier-protein] reductase FabG
Cc00_g33660	GSCOC_T00007656001	3.74610823594061	Putative Protein kinase superfamily protein
Cc09_g02140	GSCOC_T00017713001	3.58192172118658	Putative BEST Arabidopsis thaliana protein match is
Cc03_g09080	GSCOC_T00042716001	3.34316939444279	Peptidyl-prolyl cis-trans isomerase FKBP65
Cc03_g11020	GSCOC_T00042054001	3.19793285543005	Kirola
Cc00_g12970	GSCOC_T00005419001	3.10589394925593	8-hydroxyquercetin 8-O-methyltransferase
Cc00_g33450	GSCOC_T00007482001	2.65308762812989	Hypothetical protein

## Sheet: SWD_vs_WW_aCO2_down
Gene ID	TID	Log2FC	Protein Name
Cc11_g08360	GSCOC_T00032886001	-10.3701924889884	Putative MLP-like protein 28
Cc04_g12550	GSCOC_T00005319001	-10.2367575977252	Probable LRR receptor-like serine/threonine-protein kinase At4g26540
Cc11_g07530	GSCOC_T00018044001	-9.90199915919143	Putative LRR receptor-like serine/threonine-protein kinase GSO1
Cc03_g14300	GSCOC_T00031828001	-9.06100240011632	Hypothetical protein
Cc08_g03880	GSCOC_T00034185001	-9.04922457763694	Putative CASP-like protein RCOM_1206790
Cc07_g14500	GSCOC_T00036608001	-9.01368418948724	Putative Transcription factor bHLH96
Cc10_g01820	GSCOC_T00024670001	-8.80445663555314	Endoglucanase 24
Cc00_g18380	GSCOC_T00005502001	-8.75155258378878	Momilactone A synthase
Cc02_g13790	GSCOC_T00029096001	-8.5820077605052	Putative Protein E6
Cc01_g10080	GSCOC_T00024088001	-8.53708605716512	Putative Lysosomal Pro-X carboxypeptidase
Cc11_g05600	GSCOC_T00020519001	-8.52020386554886	Putative CONTAINS InterPro DOMAIN/s
Cc07_g00190	GSCOC_T00019083001	-8.37084193242582	Pectate lyase
Cc01_g09890	GSCOC_T00024060001	-8.26273771529324	Glucomannan 4-beta-mannosyltransferase 2
Cc01_g08330	GSCOC_T00015536001	-8.23779562279218	Putative Receptor-like protein 12
Cc01_g08250	GSCOC_T00015525001	-8.19548899166979	Putative Receptor-like protein 12
Cc05_g11830	GSCOC_T00021265001	-8.07674889627134	Putative uncharacterized protein
Cc01_g03450	GSCOC_T00033106001	-8.05082787029865	Putative Probable LRR receptor-like serine/threonine-protein kinase At4g08850
Cc02_g32030	GSCOC_T00018911001	-7.97587012039639	Putative Probable serine/threonine-protein kinase Cx32, chloroplastic
Cc10_g04590	GSCOC_T00034917001	-7.95304173157367	Putative Subtilisin-like protease
Cc00_g05060	GSCOC_T00000062001	-7.92980330344821	Putative Leucine-rich repeat receptor-like serine/threonine-protein kinase At1g17230
Cc11_g10910	GSCOC_T00032513001	-7.8993040829499	Phosphate transporter PHO1 homolog 1
Cc01_g08220	GSCOC_T00015515001	-7.89881563919845	Putative receptor like protein 33
Cc00_g00240	GSCOC_T00036101001	-7.82500236125008	UDP-glycosyltransferase 86A1
Cc03_g03080	GSCOC_T00025985001	-7.76912021239313	Adenylate isopentenyltransferase 5, chloroplastic
Cc02_g15520	GSCOC_T00014003001	-7.70082128492758	Hypothetical protein
Cc09_g04130	GSCOC_T00017463001	-7.59817251757098	unknown protein; BEST Arabidopsis thaliana protein match is
Cc01_g06720	GSCOC_T00030070001	-7.59148434926276	L-ascorbate oxidase
Cc07_g09120	GSCOC_T00040308001	-7.55646498856646	Anthocyanidin 3-O-glucosyltransferase 5
Cc11_g04630	GSCOC_T00004822001	-7.48185293935798	unknown protein; INVOLVED IN
Cc05_g10310	GSCOC_T00021467001	-7.48180167285047	Polyphenol oxidase I, chloroplastic
Cc11_g06460	GSCOC_T00020659001	-7.40076349646278	Cation/H( ) antiporter 20
Cc01_g00170	GSCOC_T00012417001	-7.35187647401681	Putative Cytochrome P450
Cc10_g09410	GSCOC_T00031548001	-7.27038031775125	Putative Protein AIG1
Cc04_g03610	GSCOC_T00022056001	-7.26915000510403	Auxin-induced protein 22A
Cc04_g06890	GSCOC_T00022490001	-7.23259269086931	Probable non-specific lipid-transfer protein AKCS9
Cc11_g06770	GSCOC_T00020703001	-7.22738792110739	Putative Receptor-like protein 12
Cc02_g15530	GSCOC_T00014005001	-7.15566616198416	Putative uncharacterized protein
Cc02_g14530	GSCOC_T00013864001	-7.11844826833138	Putative GDSL esterase/lipase At1g28570
Cc03_g08150	GSCOC_T00033208001	-7.10286391781919	Hypothetical protein
Cc06_g16770	GSCOC_T00004128001	-7.08687253814617	Thiol protease SEN102
Cc00_g28840	GSCOC_T00011248001	-7.06305316674277	Cellulose synthase-like protein G3
Cc11_g07480	GSCOC_T00018049001	-6.95277041801271	Putative Receptor-like protein 12
Cc10_g14320	GSCOC_T00012023001	-6.95267146615057	Putative uncharacterized protein
Cc10_g14530	GSCOC_T00033590001	-6.8909569476468	Putative uncharacterized protein
Cc08_g05610	GSCOC_T00024342001	-6.88494260169942	Probable carotenoid cleavage dioxygenase 4, chloroplastic
Cc11_g06730	GSCOC_T00020698001	-6.83146879972306	Putative LRR receptor-like serine/threonine-protein kinase ERECTA
Cc02_g30100	GSCOC_T00038963001	-6.78957789359232	Cytokinin dehydrogenase 9
Cc05_g04330	GSCOC_T00031655001	-6.78226001671607	L-ascorbate oxidase homolog
Cc06_g14430	GSCOC_T00041257001	-6.77733175964328	Putative glutamine amidotransferase YLR126C
Cc04_g10740	GSCOC_T00042644001	-6.76502691206561	Probable pectate lyase 22
Cc05_g05080	GSCOC_T00035060001	-6.73845812682431	Cytochrome P450 71D10
Cc02_g28330	GSCOC_T00025208001	-6.73401816907603	Protein of unknown function, DUF642
Cc07_g20410	GSCOC_T00015692001	-6.71844487164899	Putative Receptor-like protein 12
Cc08_g13370	GSCOC_T00030352001	-6.63457749315327	Predicted protein (Fragment)
Cc04_g04250	GSCOC_T00022147001	-6.63208780675197	Ethylene-responsive transcription factor WIN1
Cc00_g31790	GSCOC_T00011706001	-6.62940292443217	Putative Probable leucine-rich repeat receptor-like protein kinase At1g35710
Cc10_g02380	GSCOC_T00024739001	-6.6202939799429	Cytokinin dehydrogenase 5
Cc03_g12130	GSCOC_T00015283001	-6.58231893166605	Zinc transporter 5
Cc11_g07490	GSCOC_T00018048001	-6.56700385394971	Putative Leucine-rich repeat receptor protein kinase EXS
Cc07_g15610	GSCOC_T00036455001	-6.55829645604009	L-ascorbate oxidase
Cc06_g14270	GSCOC_T00041278001	-6.51851889340676	Putative Late embryogenesis abundant (LEA) hydroxyproline-rich glycoprotein family
Cc06_g14690	GSCOC_T00041223001	-6.51768526806587	Cellulose synthase A catalytic subunit 7 [UDP-forming]
Cc11_g05230	GSCOC_T00020465001	-6.50323162470906	Putative unknown protein; BEST Arabidopsis thaliana protein match is
Cc02_g05610	GSCOC_T00039074001	-6.48854477947145	Putative uncharacterized protein
Cc06_g12890	GSCOC_T00041479001	-6.47744788288062	Hypothetical protein
Cc02_g01840	GSCOC_T00020020001	-6.47200837330995	Bidirectional sugar transporter SWEET3
Cc02_g13200	GSCOC_T00029187001	-6.43780621827805	Putative Allantoinase
Cc03_g01760	GSCOC_T00025801001	-6.43632057601631	unknown protein; Has 91 Blast hits to 91 proteins in 12 species
Cc11_g05920	GSCOC_T00020568001	-6.43320218527395	Probable transmembrane ascorbate ferrireductase 3
Cc08_g08050	GSCOC_T00013081001	-6.39581568984489	Putative methyltransferases
Cc08_g15670	GSCOC_T00035507001	-6.39505298413554	Probable inactive receptor kinase At4g23740
Cc11_g14370	GSCOC_T00032066001	-6.35628885811729	MLP-like protein 423
Cc07_g05200	GSCOC_T00039786001	-6.34993559814607	Putative Probable calcium-binding protein CML41
Cc05_g01210	GSCOC_T00000928001	-6.34553448574775	Putative uncharacterized protein
Cc06_g13590	GSCOC_T00041375001	-6.33996896992528	Pathogenesis-related protein PR-1
Cc00_g14140	GSCOC_T00004713001	-6.33589490218012	Dynamin-related protein 4C
Cc00_g05670	GSCOC_T00011952001	-6.32433448514587	Putative uncharacterized protein
Cc08_g07010	GSCOC_T00025295001	-6.32018824331362	Putative Patatin group A-3
Cc00_g03780	GSCOC_T00002036001	-6.31247046039205	AAA-ATPase 1
Cc00_g18260	GSCOC_T00012288001	-6.28634890652849	Putative LRR receptor-like serine/threonine-protein kinase ERL2
Cc04_g05320	GSCOC_T00022281001	-6.28006548080314	Putative Protein ASPARTIC PROTEASE IN GUARD CELL 2
Cc00_g02160	GSCOC_T00001858001	-6.25862895010166	Hypothetical protein
Cc01_g06280	GSCOC_T00029992001	-6.20726066293402	Glucan endo-1,3-beta-glucosidase, acidic isoform GI9
Cc11_g16080	GSCOC_T00038139001	-6.18698293530574	Putative CONTAINS InterPro DOMAIN/s
Cc02_g12150	GSCOC_T00029326001	-6.11270128273961	Calcium-binding protein PBP1
Cc02_g13480	GSCOC_T00029145001	-6.10376471514049	Putative arabinogalactan protein 30
Cc02_g38700	GSCOC_T00027825001	-6.07066907695993	Putative uncharacterized protein
Cc02_g09340	GSCOC_T00029665001	-6.06386083901419	Putative Cytosolic sulfotransferase 5
Cc06_g01150	GSCOC_T00023326001	-6.06175462364445	Plant protein of unknown function (DUF828)
Cc00_g35890	GSCOC_T00005696001	-6.05005151908579	Polyphenol oxidase I, chloroplastic
Cc07_g06750	GSCOC_T00039999001	-6.01529731992599	Subtilisin-like protease
Cc00_g00570	GSCOC_T00036149001	-6.01349071876309	Putative Probable receptor-like protein kinase At1g67000
Cc02_g24810	GSCOC_T00028837001	-5.99754965883691	Putative uncharacterized protein
Cc00_g08090	GSCOC_T00006943001	-5.98408142906998	Putative Deacetylvindoline O-acetyltransferase
Cc05_g02420	GSCOC_T00020978001	-5.96621375581122	Fasciclin-like arabinogalactan protein 7
Cc05_g02480	GSCOC_T00020948001	-5.95791671281362	GDSL esterase/lipase At2g42990
Cc02_g27290	GSCOC_T00025056001	-5.95300958779704	Furcatin hydrolase
Cc07_g20340	GSCOC_T00015677001	-5.94819708985998	Putative Reticuline oxidase-like protein
Cc07_g12480	GSCOC_T00036867001	-5.92890104538152	Probable acyl-activating enzyme 6
Cc07_g16670	GSCOC_T00037533001	-5.9146473063416	Hypothetical protein
Cc02_g17450	GSCOC_T00014261001	-5.89824371261331	Uncharacterized protein
Cc01_g08630	GSCOC_T00023894001	-5.89430856140527	Putative ovate family protein 6
Cc03_g10600	GSCOC_T00004052001	-5.86340560983716	Putative Probable LRR receptor-like serine/threonine-protein kinase At4g08850
Cc04_g07350	GSCOC_T00022548001	-5.85683165354987	Putative Protein ASPARTIC PROTEASE IN GUARD CELL 1
Cc04_g16410	GSCOC_T00035736001	-5.81956397839216	Chlorophyll a-b binding protein 4, chloroplastic
Cc10_g03450	GSCOC_T00024870001	-5.80310154914817	Probable calcium-binding protein CML41
Cc00_g34680	GSCOC_T00013105001	-5.8007652094373	Putative Probable leucine-rich repeat receptor-like protein kinase At1g35710
Cc07_g06260	GSCOC_T00039925001	-5.79309984685933	Protein of unknown function (DUF579)
Cc11_g08120	GSCOC_T00032919001	-5.77450753572503	Protein PLANT CADMIUM RESISTANCE 2
Cc09_g09020	GSCOC_T00023117001	-5.76760872871265	Chlorophyll a-b binding protein 21, chloroplastic
Cc11_g05950	GSCOC_T00020572001	-5.72788696685416	Putative Ankyrin repeat family protein
Cc09_g06760	GSCOC_T00005134001	-5.69081404193679	Putative E3 ubiquitin-protein ligase LIN
Cc11_g07510	GSCOC_T00018046001	-5.67942036001213	Putative LRR receptor-like serine/threonine-protein kinase GSO1
Cc08_g14680	GSCOC_T00030194001	-5.66110705742587	Tubulin beta-1 chain
Cc02_g32420	GSCOC_T00001250001	-5.65587213489396	Histidine-containing phosphotransfer protein 1
Cc01_g02930	GSCOC_T00013234001	-5.65142561647303	G-type lectin S-receptor-like serine/threonine-protein kinase At1g11330
Cc10_g09820	GSCOC_T00031496001	-5.63426273611191	Germin-like protein subfamily 1 member 14
Cc00_g31820	GSCOC_T00004172001	-5.62881422234075	Putative Strictosidine synthase 1
Cc10_g12040	GSCOC_T00031887001	-5.60488298809697	Putative uncharacterized protein
Cc01_g19450	GSCOC_T00016056001	-5.59050813342396	Cyclin-P3-1
Cc00_g08520	GSCOC_T00005636001	-5.58376795766056	Putative Cellulose synthase-like protein G3
Cc06_g11950	GSCOC_T00041595001	-5.57920658666712	photosystem II subunit X
Cc00_g11810	GSCOC_T00007743001	-5.52778010668065	Putative Protein of unknown function (DUF594)
Cc01_g05850	GSCOC_T00027411001	-5.52404147005211	Putative Bidirectional sugar transporter SWEET3
Cc05_g10050	GSCOC_T00021507001	-5.52165137445768	Putative Protein kinase G11A
Cc00_g16220	GSCOC_T00013154001	-5.50917569400456	unknown protein; FUNCTIONS IN
Cc10_g04500	GSCOC_T00034926001	-5.50901526220154	Putative Remorin family protein
Cc02_g16700	GSCOC_T00014164001	-5.50899625282145	Auxin-induced protein 15A
Cc08_g09400	GSCOC_T00017295001	-5.49963339621642	Aquaporin TIP4-1
Cc05_g06670	GSCOC_T00042170001	-5.47925206583267	Putative unknown protein; BEST Arabidopsis thaliana protein match is
Cc03_g09260	GSCOC_T00042692001	-5.44884069985664	Putative Probable LRR receptor-like serine/threonine-protein kinase At3g47570
Cc00_g06800	GSCOC_T00007409001	-5.42891457601342	Fasciclin-like arabinogalactan protein 2
Cc02_g16180	GSCOC_T00014095001	-5.38620990070903	GDSL esterase/lipase At1g29660
Cc00_g25070	GSCOC_T00002590001	-5.37601162095883	Endoglucanase 12
Cc05_g12720	GSCOC_T00021155001	-5.34112840249978	Chlorophyll a-b binding protein 13, chloroplastic
Cc03_g04880	GSCOC_T00026219001	-5.33496145344512	Putative TPX2 (targeting protein for Xklp2) protein family
Cc01_g21630	GSCOC_T00004957001	-5.32753022185929	Long chain acyl-CoA synthetase 1
Cc08_g02120	GSCOC_T00037673001	-5.31375897029755	Type I inositol 1,4,5-trisphosphate 5-phosphatase 2
Cc00_g05040	GSCOC_T00000058001	-5.30695972817589	Hypothetical protein
Cc02_g14990	GSCOC_T00013928001	-5.29622797659734	Non-specific lipid-transfer protein
Cc09_g04660	GSCOC_T00017398001	-5.29389162938711	Putative DNA-3-methyladenine glycosylase 1
Cc07_g10490	GSCOC_T00037109001	-5.28798362491129	Putative ATP binding microtubule motor family protein
Cc07_g13390	GSCOC_T00036742001	-5.28372082140015	Glucan endo-1,3-beta-glucosidase 2
Cc02_g15480	GSCOC_T00013996001	-5.28361875833447	Cellulose synthase A catalytic subunit 8 [UDP-forming]
Cc03_g03660	GSCOC_T00026061001	-5.28197474721664	Primary amine oxidase
Cc01_g17460	GSCOC_T00016322001	-5.26740151333098	GDSL esterase/lipase At4g28780
Cc04_g03110	GSCOC_T00022000001	-5.25550823429545	Putative unknown protein; FUNCTIONS IN
Cc11_g14750	GSCOC_T00032014001	-5.22518258118759	Putative Glucan endo-1,3-beta-glucosidase 13
Cc04_g00680	GSCOC_T00021691001	-5.21759211686743	Pectinesterase/pectinesterase inhibitor U1
Cc07_g16100	GSCOC_T00037608001	-5.21500925422187	Putative Probable carboxylesterase 6
Cc02_g04420	GSCOC_T00020354001	-5.21482266899166	Leucine-rich repeat receptor-like protein kinase TDR
Cc00_g05030	GSCOC_T00000057001	-5.2129478511815	Putative Probably inactive leucine-rich repeat receptor-like protein kinase At2g25790
Cc06_g17600	GSCOC_T00040342001	-5.21121833792699	Putative unknown protein; FUNCTIONS IN
Cc10_g04610	GSCOC_T00034915001	-5.20335888050177	Putative Subtilisin-like protease
Cc01_g10350	GSCOC_T00024125001	-5.20249811396888	Protein of unknown function (DUF1635)
Cc04_g07590	GSCOC_T00022589001	-5.18744044911875	Hypothetical protein
Cc00_g31960	GSCOC_T00012136001	-5.18315598883548	COBRA-like protein 4
Cc05_g10280	GSCOC_T00021472001	-5.1814744936758	Hypothetical protein
Cc01_g05840	GSCOC_T00027410001	-5.17757701333697	Bidirectional sugar transporter SWEET3b
Cc09_g08490	GSCOC_T00020817001	-5.13441352781005	Photosystem I reaction center subunit psaK, chloroplastic
Cc04_g16610	GSCOC_T00035767001	-5.13404688230711	Gibberellin-regulated protein 6
Cc11_g17410	GSCOC_T00038308001	-5.12183428397003	NAC domain containing protein 83
Cc00_g28120	GSCOC_T00004031001	-5.12133509165721	Putative Cytosolic sulfotransferase 15
Cc11_g10870	GSCOC_T00032519001	-5.12118492014427	Hypothetical protein
Cc08_g12770	GSCOC_T00030433001	-5.09635564766683	14 kDa proline-rich protein DC2.15
Cc02_g20260	GSCOC_T00014634001	-5.08317668332975	Probable xyloglucan endotransglucosylase/hydrolase protein 10
Cc08_g07030	GSCOC_T00025297001	-5.08287030820891	Putative Patatin group A-3
Cc07_g18350	GSCOC_T00018764001	-5.06660418137375	Putative ankyrin repeat containing protein, identical
Cc11_g08370	GSCOC_T00032885001	-5.06305796927919	Putative MLP-like protein 28
Cc04_g04550	GSCOC_T00022184001	-5.06100729865593	alpha/beta-Hydrolases superfamily protein
Cc00_g01360	GSCOC_T00010937001	-5.01903201729679	Probable indole-3-acetic acid-amido synthetase GH3.1
Cc06_g12230	GSCOC_T00041563001	-5.01697260702971	Subtilisin-like protease
Cc05_g06770	GSCOC_T00042189001	-5.01649176413475	Tabersonine 16-hydroxylase (Fragment)
Cc10_g04510	GSCOC_T00034925001	-5.0135527194895	alpha/beta-Hydrolases superfamily protein
Cc02_g27260	GSCOC_T00025053001	-5.0097086930028	Beta-glucosidase 12
Cc05_g07890	GSCOC_T00016793001	-4.99081541889865	8-hydroxyquercetin 8-O-methyltransferase
Cc03_g09580	GSCOC_T00030941001	-4.9905219049103	Putative Probably inactive leucine-rich repeat receptor-like protein kinase At5g48380
Cc02_g27240	GSCOC_T00025049001	-4.98706411921986	Beta-glucosidase 10
Cc00_g18270	GSCOC_T00012290001	-4.98662310302283	Putative Receptor-like protein 12
Cc02_g12760	GSCOC_T00029241001	-4.97319089564822	Metal-nicotianamine transporter YSL1
Cc03_g07230	GSCOC_T00026566001	-4.96489352935589	Probable pectate lyase 15
Cc07_g10430	GSCOC_T00037117001	-4.9488781471911	Probable pectinesterase 53
Cc03_g08650	GSCOC_T00033294001	-4.9396629760936	Putative Probable LRR receptor-like serine/threonine-protein kinase At4g08850
Cc05_g15350	GSCOC_T00038702001	-4.93145669942755	Probable LRR receptor-like serine/threonine-protein kinase At4g26540
Cc10_g12870	GSCOC_T00035375001	-4.92921336862478	Serine carboxypeptidase-like 42
Cc00_g09260	GSCOC_T00012312001	-4.91433632578394	Putative NBS resistance protein
Cc03_g15130	GSCOC_T00026773001	-4.91250676040139	Putative UDP-glycosyltransferase 74E2
Cc03_g14200	GSCOC_T00031814001	-4.89680063897249	Plant basic secretory protein (BSP) family protein
Cc07_g17590	GSCOC_T00018878001	-4.8829566383026	Putative G-type lectin S-receptor-like serine/threonine-protein kinase RLK1
Cc00_g28800	GSCOC_T00011418001	-4.87951785561699	Putative Isoflavone 7-O-methyltransferase
Cc07_g16650	GSCOC_T00037536001	-4.8523125347711	Protein of unknown function (DUF3511)
Cc00_g27080	GSCOC_T00004251001	-4.83144086928912	Hypothetical protein
Cc08_g08370	GSCOC_T00007228001	-4.83012866285535	Caffeic acid 3-O-methyltransferase
Cc00_g21880	GSCOC_T00013638001	-4.82856983339379	Putative UDP-glycosyltransferase 83A1
Cc02_g29340	GSCOC_T00018351001	-4.82262900243258	Putative amidase C869.01
Cc02_g03820	GSCOC_T00020280001	-4.82095550638878	Putative Cell cycle regulated microtubule associated protein
Cc01_g05480	GSCOC_T00027347001	-4.81235091965611	Putative Probable leucine-rich repeat receptor-like protein kinase At1g35710
Cc09_g05880	GSCOC_T00033398001	-4.79222548426465	Kinase, putative
Cc09_g03350	GSCOC_T00017560001	-4.78711784074449	Dynamin-related protein 4C
Cc02_g37540	GSCOC_T00027976001	-4.78193762355543	( )-neomenthol dehydrogenase
Cc01_g06140	GSCOC_T00027452001	-4.77700399434587	Putative LRR receptor-like serine/threonine-protein kinase GSO1
Cc07_g06090	GSCOC_T00039904001	-4.77699975481057	unknown protein; FUNCTIONS IN
Cc01_g08780	GSCOC_T00023914001	-4.77340593765858	photosystem I subunit O
Cc08_g04240	GSCOC_T00034240001	-4.77084799873755	Putative Disease resistance protein RGA2
Cc07_g06020	GSCOC_T00039894001	-4.74408137575071	Putative Remorin family protein
Cc00_g22200	GSCOC_T00012731001	-4.73934297373436	Hypothetical protein
Cc08_g04410	GSCOC_T00034266001	-4.72601718983749	Hypothetical protein
Cc02_g06950	GSCOC_T00039249001	-4.72358216460885	Laccase-4
Cc11_g14460	GSCOC_T00032056001	-4.7047143306024	NHL domain-containing protein
Cc04_g16710	GSCOC_T00035779001	-4.70129200059054	Hypothetical protein
Cc02_g29530	GSCOC_T00018389001	-4.69727747755002	Putative 21 kDa seed protein
Cc04_g11300	GSCOC_T00037301001	-4.69076219537034	Putative Cytochrome P450 71A26
Cc11_g05720	GSCOC_T00020540001	-4.67346274184329	65-kDa microtubule-associated protein 7
Cc00_g03770	GSCOC_T00002032001	-4.64744484892367	AAA-ATPase 1
Cc05_g00110	GSCOC_T00017031001	-4.63143560344016	Hypothetical protein
Cc02_g33720	GSCOC_T00015419001	-4.62615472221786	Putative Protein kinase superfamily protein
Cc03_g09190	GSCOC_T00042703001	-4.62595628812765	Probable xyloglucan endotransglucosylase/hydrolase protein 16
Cc06_g21770	GSCOC_T00015575001	-4.61138504881281	Putative uncharacterized protein
Cc06_g11940	GSCOC_T00041597001	-4.61023213647328	Putative Mechanosensitive ion channel protein 10
Cc00_g16370	GSCOC_T00011224001	-4.60982726431063	Glutamate receptor 2.7
Cc01_g00050	GSCOC_T00012435001	-4.60309723256796	arabinogalactan protein 14
Cc00_g02000	GSCOC_T00000828001	-4.60063114098308	Mitochondrial transcription termination factor family protein
Cc03_g08140	GSCOC_T00033206001	-4.59534284213327	Putative Reticulon-like protein B13
Cc09_g00150	GSCOC_T00017985001	-4.58985239218523	Hypothetical protein
Cc06_g01660	GSCOC_T00023395001	-4.58186465241033	Putative UPF0503 protein At3g09070, chloroplastic
Cc04_g02690	GSCOC_T00021947001	-4.57751098519527	Putative uncharacterized protein
Cc00_g05380	GSCOC_T00000535001	-4.5691425064976	Hypothetical protein
Cc00_g04360	GSCOC_T00005968001	-4.56517035500254	Putative cytochrome BC1 synthesis
Cc10_g09760	GSCOC_T00031503001	-4.56226162739818	Putative Probable peptide/nitrate transporter At1g22540
Cc03_g13110	GSCOC_T00030601001	-4.56030937806417	Tetrapyrrole-binding protein, chloroplastic
Cc00_g25900	GSCOC_T00006242001	-4.55749112772657	EXORDIUM like 2
Cc01_g15220	GSCOC_T00016590001	-4.54705791911435	Putative ovate family protein 3
Cc09_g09030	GSCOC_T00023116001	-4.53058206111721	Chlorophyll a-b binding protein 21, chloroplastic
Cc01_g12250	GSCOC_T00028155001	-4.52977946827475	Putative Protein of unknown function (DUF1635)
Cc02_g13210	GSCOC_T00029186001	-4.52518699502413	Hypothetical protein
Cc00_g18440	GSCOC_T00011147001	-4.52056272283575	G-type lectin S-receptor-like serine/threonine-protein kinase At4g03230
Cc00_g11560	GSCOC_T00003165001	-4.52002191725157	Putative Disease resistance protein RGA2
Cc10_g09170	GSCOC_T00034285001	-4.49419706072225	Putative Cytochrome P450 82C4
Cc04_g16480	GSCOC_T00035750001	-4.49245664730155	Putative Probable calcium-binding protein CML47
Cc00_g04110	GSCOC_T00013741001	-4.47253492500479	Xylem cysteine proteinase 1
Cc04_g07700	GSCOC_T00022604001	-4.46718892055832	Protein of unknown function, DUF617
Cc09_g09860	GSCOC_T00006973001	-4.45547850655882	Putative Mavicyanin
Cc10_g13470	GSCOC_T00035288001	-4.45169844299605	Putative Subtilisin-like protease SDD1
Cc04_g03720	GSCOC_T00022069001	-4.44761589681605	Putative Gibberellin 20 oxidase 3
Cc00_g10230	GSCOC_T00006743001	-4.43366514008279	Putative Gibberellin 3-beta-dioxygenase 4
Cc05_g10320	GSCOC_T00021462001	-4.42419170744427	Interactor of constitutive active ROPs 4
Cc04_g16450	GSCOC_T00035743001	-4.41796464069234	Putative Cytosolic sulfotransferase 5
Cc04_g06040	GSCOC_T00022383001	-4.416984138264	Probable inactive receptor kinase At1g48480
Cc00_g15440	GSCOC_T00001450001	-4.41162069125412	Putative Probable LRR receptor-like serine/threonine-protein kinase At4g08850
Cc11_g08330	GSCOC_T00032889001	-4.41091138757126	phosphoglucomutase, putative / glucose phosphomutase, putative
Cc05_g15410	GSCOC_T00038696001	-4.40525252445948	kinesin-like protein 1
Cc06_g13860	GSCOC_T00041337001	-4.39789462133293	Putative unknown protein; FUNCTIONS IN
Cc11_g00210	GSCOC_T00019446001	-4.39776076764809	BTB/POZ domain-containing protein At3g19850
Cc10_g07690	GSCOC_T00034491001	-4.39548953460792	Putative uncharacterized protein
Cc00_g18460	GSCOC_T00011149001	-4.39330181975021	S-locus lectin protein kinase family protein
Cc00_g25690	GSCOC_T00004622001	-4.38480487869322	Putative uncharacterized protein
Cc05_g10830	GSCOC_T00021393001	-4.38434843157559	Probable leucine-rich repeat receptor-like serine/threonine-protein kinase At3g14840
Cc06_g15060	GSCOC_T00030885001	-4.36538506792635	Probable LRR receptor-like serine/threonine-protein kinase At2g24230
Cc09_g03470	GSCOC_T00017545001	-4.36293763918397	Putative auxin efflux carrier component 8
Cc11_g08470	GSCOC_T00032870001	-4.35996396079457	Putative Protein PLANT CADMIUM RESISTANCE 2
Cc05_g11240	GSCOC_T00021340001	-4.34189474216471	TPR repeat-containing thioredoxin TTL1
Cc10_g02240	GSCOC_T00024723001	-4.33640590839927	Auxin-induced protein 5NG4
Cc11_g09790	GSCOC_T00032670001	-4.33344852901806	Putative Protein kinase superfamily protein
Cc00_g16690	GSCOC_T00012625001	-4.33111688822978	Putative Gibberellin 3-beta-dioxygenase 4
Cc00_g16900	GSCOC_T00011320001	-4.3257654048927	Putative Probable LRR receptor-like serine/threonine-protein kinase At4g08850
Cc07_g10200	GSCOC_T00037148001	-4.31763140252385	Beta-galactosidase 3
Cc07_g14150	GSCOC_T00036651001	-4.30729115359106	MADS-box protein SVP
Cc03_g03140	GSCOC_T00025993001	-4.30455306774557	Hypothetical protein
Cc00_g29270	GSCOC_T00002467001	-4.30451730045204	Putative Polynucleotidyl transferase, ribonuclease H-like superfamily protein
Cc11_g08800	GSCOC_T00032824001	-4.30378036509506	unknown protein; BEST Arabidopsis thaliana protein match is
Cc11_g04680	GSCOC_T00004833001	-4.30343667729016	Putative Cytosolic sulfotransferase 17
Cc03_g09320	GSCOC_T00042684001	-4.30250276899041	Probable receptor protein kinase TMK1
Cc10_g15290	GSCOC_T00033704001	-4.27062066691055	Tryptophan aminotransferase-related protein 4
Cc10_g06830	GSCOC_T00034606001	-4.25733510361507	F-box protein FBW2
Cc02_g06400	GSCOC_T00039173001	-4.25586999560939	Omega-3 fatty acid desaturase, chloroplastic
Cc08_g14170	GSCOC_T00030258001	-4.24799771013347	Putative BON association protein 2
Cc08_g11060	GSCOC_T00027097001	-4.24787015876231	Putative Probable WRKY transcription factor 50
Cc10_g02560	GSCOC_T00024760001	-4.24341561434119	Jasmonate O-methyltransferase
Cc02_g29000	GSCOC_T00011527001	-4.23840740797299	Protein of unknown function (DUF288)
Cc00_g17910	GSCOC_T00008097001	-4.23387474310022	Gibberellin 2-beta-dioxygenase 8
Cc02_g11770	GSCOC_T00029373001	-4.23312408364131	Oxygen-evolving enhancer protein 3-2, chloroplastic
Cc03_g14830	GSCOC_T00026726001	-4.22795599995171	Putative UDP-glycosyltransferase 71C4
Cc00_g34260	GSCOC_T00012941001	-4.22520596190799	Putative amidase C869.01
Cc05_g09960	GSCOC_T00021519001	-4.22300891294685	CASP-like protein VIT_01s0010g01870
Cc00_g00500	GSCOC_T00036137001	-4.21753205112968	Putative Protein kinase superfamily protein
Cc07_g07060	GSCOC_T00040040001	-4.21162756559675	Putative BTB/POZ domain-containing protein At3g49900
Cc10_g16210	GSCOC_T00033837001	-4.19991225569339	Chlorophyll a-b binding protein CP26, chloroplastic
Cc06_g06330	GSCOC_T00031396001	-4.19513150648386	Putative ovate family protein 13
Cc07_g11210	GSCOC_T00037027001	-4.18998887846885	Peroxidase 64
Cc11_g08990	GSCOC_T00032801001	-4.18823771312611	Putative UDP-glucose flavonoid 3-O-glucosyltransferase 6
Cc02_g12240	GSCOC_T00029309001	-4.18250595795879	Major facilitator superfamily protein
Cc02_g14920	GSCOC_T00013918001	-4.17808207332964	Putative Endoribonuclease Dicer homolog 2
Cc02_g34070	GSCOC_T00000642001	-4.17246753665942	Putative uncharacterized protein
Cc11_g05690	GSCOC_T00020534001	-4.1722643626682	Putative UDP-glycosyltransferase 83A1
Cc06_g03580	GSCOC_T00023643001	-4.17214605287222	alpha/beta-Hydrolases superfamily protein
Cc02_g29320	GSCOC_T00018347001	-4.16881185628534	Putative amidase C869.01
Cc01_g03290	GSCOC_T00033134001	-4.15596443623898	Nucleotide-diphospho-sugar transferases superfamily protein
Cc08_g14000	GSCOC_T00030276001	-4.15352710919804	BAG family molecular chaperone regulator 3
Cc00_g31940	GSCOC_T00009627001	-4.14326908678924	UDP-glucuronate 4-epimerase 6
Cc07_g13350	GSCOC_T00036754001	-4.14304051144671	Probable inactive receptor kinase At1g48480
Cc00_g24030	GSCOC_T00013492001	-4.13225992096337	Putative Cytosolic sulfotransferase 15
Cc08_g04220	GSCOC_T00034235001	-4.12986301767922	Putative disease resistance protein RGA1
Cc03_g08200	GSCOC_T00033216001	-4.11984794440484	Hypothetical protein
Cc03_g05450	GSCOC_T00026300001	-4.11666077777981	Probable inorganic phosphate transporter 1-3
Cc05_g08550	GSCOC_T00016879001	-4.09796929066094	Putative unknown protein; CONTAINS InterPro DOMAIN/s
Cc01_g12000	GSCOC_T00028119001	-4.08137289389421	Putative 125 kDa kinesin-related protein
Cc02_g25400	GSCOC_T00028750001	-4.08102735107155	Rac-like GTP-binding protein ARAC9
Cc04_g02940	GSCOC_T00021978001	-4.0806875942646	Probable peptide transporter At1g52190
Cc01_g19100	GSCOC_T00016102001	-4.08063787126803	Plant protein of unknown function (DUF828) with plant pleckstrin homology-like region
Cc11_g11680	GSCOC_T00032413001	-4.08015506858796	Putative uncharacterized protein
Cc03_g08610	GSCOC_T00033289001	-4.07917702801923	Putative Probable LRR receptor-like serine/threonine-protein kinase At4g08850
Cc05_g14320	GSCOC_T00038832001	-4.07219650258291	65-kDa microtubule-associated protein 1
Cc02_g22480	GSCOC_T00014919001	-4.07060214909139	maternal effect embryo arrest 9
Cc07_g15520	GSCOC_T00036465001	-4.06222799020623	Putative Protein of unknown function (DUF581)
Cc08_g01450	GSCOC_T00038384001	-4.06005467540654	Putative Ankyrin repeat-containing protein At3g12360
Cc07_g06060	GSCOC_T00039899001	-4.0470694549146	Putative alpha/beta-Hydrolases superfamily protein
Cc08_g01300	GSCOC_T00038405001	-4.0401144662398	photosystem II subunit X
Cc09_g02010	GSCOC_T00017735001	-4.04002033448745	Chlorophyll a-b binding protein 6A, chloroplastic
Cc06_g23280	GSCOC_T00040594001	-4.03847947115396	Photosystem II 5 kDa protein, chloroplastic
Cc06_g23710	GSCOC_T00040535001	-4.02553216403333	Putative uncharacterized protein
Cc11_g08480	GSCOC_T00032866001	-4.0232479876998	Putative Protein PLANT CADMIUM RESISTANCE 2
Cc02_g39490	GSCOC_T00027708001	-4.02144103060902	AP2/ERF domain-containing transcription factor
Cc02_g25800	GSCOC_T00028696001	-4.01938495977393	Putative Protein WAX2
Cc10_g01640	GSCOC_T00024647001	-4.00940342667566	Tubulin beta-1 chain
Cc00_g11000	GSCOC_T00000138001	-4.00927869718124	Secologanin synthase
Cc00_g05690	GSCOC_T00011954001	-4.00763320709708	Putative amidase C869.01
Cc10_g06910	GSCOC_T00034596001	-4.00426096388779	UDP-glycosyltransferase 85A1
Cc11_g07400	GSCOC_T00018057001	-4.00107396977626	Protein of unknown function (DUF1295)
Cc11_g13740	GSCOC_T00032144001	-3.98413333532996	Putative membrane lipoprotein
Cc03_g08680	GSCOC_T00033298001	-3.97873078580675	Putative Probable LRR receptor-like serine/threonine-protein kinase At4g08850
Cc02_g37530	GSCOC_T00027977001	-3.97165697334603	( )-neomenthol dehydrogenase
Cc10_g05840	GSCOC_T00034756001	-3.96972911444208	Putative Protein of unknown function (DUF581)
Cc02_g21300	GSCOC_T00014767001	-3.96285981196313	UDP-glycosyltransferase 85A2
Cc05_g09430	GSCOC_T00021586001	-3.94847622915869	Predicted protein
Cc10_g12590	GSCOC_T00031977001	-3.94064987122594	Photosystem I reaction center subunit N, chloroplastic
Cc09_g03760	GSCOC_T00017506001	-3.93272702145928	Serine carboxypeptidase-like 20
Cc02_g23060	GSCOC_T00014985001	-3.92469734605	Lactoylglutathione lyase / glyoxalase I family protein
Cc07_g19950	GSCOC_T00033902001	-3.92327582253099	Hypothetical protein
Cc02_g21310	GSCOC_T00014768001	-3.92036315990519	UDP-glycosyltransferase 85A3
Cc00_g12970	GSCOC_T00005419001	-3.91509333755859	8-hydroxyquercetin 8-O-methyltransferase
Cc11_g14140	GSCOC_T00032100001	-3.90835748480547	Putative Uncharacterized WD repeat-containing protein alr3466
Cc09_g05150	GSCOC_T00007088001	-3.90293202347865	Putative Cytochrome P450 89A2
Cc02_g32130	GSCOC_T00018930001	-3.89346948304489	Probable inactive leucine-rich repeat receptor-like protein kinase At3g03770
Cc02_g30560	GSCOC_T00023784001	-3.89049250907171	Perakine reductase
Cc02_g01990	GSCOC_T00020041001	-3.87927802884666	Probable inactive receptor kinase At4g23740
Cc07_g07190	GSCOC_T00040057001	-3.86949887358178	Putative unknown protein; FUNCTIONS IN
Cc02_g30120	GSCOC_T00038966001	-3.86702743014866	Putative IQ-domain 11
Cc02_g02310	GSCOC_T00020082001	-3.86526538816171	Putative uncharacterized protein
Cc08_g15060	GSCOC_T00035430001	-3.86148869490835	Putative phosphoglycerate mutase DET1
Cc00_g30480	GSCOC_T00003185001	-3.85947564594854	Putative Disease resistance protein RGA2
Cc07_g04230	GSCOC_T00039675001	-3.85282442644944	Putative hydroxyproline-rich glycoprotein family protein
Cc02_g17600	GSCOC_T00014280001	-3.8519414181317	Probable receptor-like serine/threonine-protein kinase At4g34500
Cc03_g14190	GSCOC_T00031813001	-3.84322337261246	Basic endochitinase
Cc10_g08180	GSCOC_T00034427001	-3.840198387678	Zinc finger (C3HC4-type RING finger) family protein
Cc01_g15790	GSCOC_T00016517001	-3.83368048018845	Uncharacterized protein
Cc00_g06550	GSCOC_T00005831001	-3.83250926605428	Putative Gibberellin 20 oxidase 1
Cc11_g08850	GSCOC_T00032819001	-3.82226078684993	Putative Spore coat protein A
Cc01_g17930	GSCOC_T00016263001	-3.82041597158502	Cellulose synthase A catalytic subunit 4 [UDP-forming]
Cc00_g00530	GSCOC_T00036141001	-3.81640052465828	Putative Probable receptor-like protein kinase At5g39030
Cc11_g05710	GSCOC_T00020539001	-3.81415869987541	Hypothetical protein
Cc04_g14280	GSCOC_T00001598001	-3.81334245062164	Alpha-galactosidase
Cc10_g15220	GSCOC_T00033691001	-3.80808154598329	Putative Probable LRR receptor-like serine/threonine-protein kinase At4g08850
Cc04_g05440	GSCOC_T00022295001	-3.80738628461111	Protein WAX2
Cc00_g06060	GSCOC_T00000135001	-3.80647286167956	Putative Lactase-phlorizin hydrolase
Cc03_g01750	GSCOC_T00025797001	-3.80425575741381	Putative Transducin/WD40 repeat-like superfamily protein
Cc00_g34910	GSCOC_T00006527001	-3.80192547406424	Putative 3-hydroxyacyl-CoA dehydratase 1
Cc03_g06020	GSCOC_T00026378001	-3.797026197084	Putative Actin-related protein 2/3 complex subunit 2
Cc06_g06020	GSCOC_T00043172001	-3.7960200909042	SAUR-like auxin-responsive protein family
Cc02_g16660	GSCOC_T00014159001	-3.78823916059198	Putative Aquaporin AQPcic
Cc02_g39650	GSCOC_T00027687001	-3.78480409915197	NC domain-containing protein-related
Cc04_g08520	GSCOC_T00022714001	-3.78455089738503	Putative GDSL esterase/lipase At5g03980
Cc10_g01860	GSCOC_T00024675001	-3.77748493890734	Auxin-induced protein 15A
Cc06_g12990	GSCOC_T00041464001	-3.77363670684959	Putative hydroxyproline-rich glycoprotein family protein
Cc08_g14420	GSCOC_T00030224001	-3.7732335202531	Putative Myosin heavy chain-related protein
Cc00_g30720	GSCOC_T00002466001	-3.76745998548444	Hypothetical protein
Cc09_g06910	GSCOC_T00003645001	-3.76399007787725	L-type lectin-domain containing receptor kinase IV.1
Cc11_g16950	GSCOC_T00038248001	-3.76348810816797	Putative uncharacterized protein
Cc05_g14940	GSCOC_T00038756001	-3.75869573889732	Fasciclin-like arabinogalactan protein 1
Cc00_g18700	GSCOC_T00010033001	-3.75484054593306	Putative Disease resistance protein RGA2
Cc02_g26410	GSCOC_T00028611001	-3.74381884717494	Putative Glutathione transferase GST 23
Cc11_g14290	GSCOC_T00032077001	-3.74217078453635	Cyclin-D1-1
Cc02_g19000	GSCOC_T00014462001	-3.74155080794531	Putative Filament-like plant protein 7
Cc07_g17470	GSCOC_T00037426001	-3.73985004624379	Putative G-type lectin S-receptor-like serine/threonine-protein kinase RLK1
Cc00_g25450	GSCOC_T00002062001	-3.73811804308628	Putative Probable LRR receptor-like serine/threonine-protein kinase At4g08850
Cc05_g15690	GSCOC_T00038657001	-3.73094628317596	Hypothetical protein
Cc08_g02490	GSCOC_T00037725001	-3.72615684283826	Protein LOL1
Cc07_g06860	GSCOC_T00040011001	-3.72345461558787	Putative uncharacterized protein
Cc06_g17820	GSCOC_T00040373001	-3.72339255707255	Zeatin O-glucosyltransferase
Cc10_g01440	GSCOC_T00024615001	-3.71607585674096	ABC transporter B family member 13
Cc00_g33220	GSCOC_T00002332001	-3.71522442407705	Hypothetical protein
Cc01_g08460	GSCOC_T00010703001	-3.71410078424334	Putative Hydroxycinnamoyl-Coenzyme A shikimate/quinate hydroxycinnamoyltransferase
Cc08_g01190	GSCOC_T00038420001	-3.71351470226337	Putative Glyoxylate reductase
Cc00_g25490	GSCOC_T00000226001	-3.70972793597086	Putative 8-hydroxyquercetin 8-O-methyltransferase
Cc00_g29880	GSCOC_T00006934001	-3.70505557564637	8-hydroxyquercetin 8-O-methyltransferase
Cc10_g05940	GSCOC_T00034734001	-3.69576961060776	Hypothetical protein
Cc02_g14500	GSCOC_T00013861001	-3.692220882402	Hexose carrier protein HEX6
Cc07_g00050	GSCOC_T00019067001	-3.68683434729743	GDSL esterase/lipase At5g14450
Cc11_g13330	GSCOC_T00032194001	-3.68384295668123	myb domain protein 88
Cc10_g15010	GSCOC_T00033663001	-3.68216594282906	Probable cellulose synthase A catalytic subunit 9 [UDP-forming]
Cc08_g04110	GSCOC_T00034217001	-3.67946523160183	Putative disease resistance protein RGA1
Cc04_g08610	GSCOC_T00022727001	-3.67883971858762	Putative Disease resistance protein RPP13
Cc04_g02680	GSCOC_T00021945001	-3.67648436842926	Putative GATA transcription factor 12
Cc04_g06970	GSCOC_T00022498001	-3.67275449161112	Calmodulin binding protein-like
Cc05_g12860	GSCOC_T00021133001	-3.66681959979307	G-type lectin S-receptor-like serine/threonine-protein kinase At4g27290
Cc03_g03330	GSCOC_T00026017001	-3.66555928520418	Glucose-1-phosphate adenylyltransferase large subunit 1, chloroplastic
Cc05_g04890	GSCOC_T00035027001	-3.65539375174997	Glucose-6-phosphate/phosphate translocator 2, chloroplastic
Cc00_g28380	GSCOC_T00007303001	-3.65455992211587	Iron-sulfur assembly protein IscA-like 1, mitochondrial
Cc02_g39680	GSCOC_T00027682001	-3.6525047016759	Calcium-binding protein KIC
Cc10_g11220	GSCOC_T00018468001	-3.64554440195016	UDP-glycosyltransferase 85A1
Cc01_g11930	GSCOC_T00028109001	-3.64457477828779	Phototropin-1
Cc02_g21720	GSCOC_T00014817001	-3.63865912421139	Chlorophyll a-b binding protein CP24 10A, chloroplastic
Cc08_g16650	GSCOC_T00035631001	-3.63703278685065	Putative Stellacyanin
Cc05_g02390	GSCOC_T00020988001	-3.63497145028274	Iron-sulfur assembly protein IscA-like 1, mitochondrial
Cc07_g01140	GSCOC_T00019202001	-3.63460766765284	Putative CASP-like protein POPTRDRAFT_752786
Cc07_g15160	GSCOC_T00036511001	-3.63307152048964	Putative uncharacterized protein
Cc00_g08510	GSCOC_T00005634001	-3.62154089770298	Putative Cellulose synthase-like protein G2
Cc08_g07720	GSCOC_T00011859001	-3.62100723671354	Hypothetical protein
Cc06_g04260	GSCOC_T00023738001	-3.6199205699722	ABC transporter B family member 1
Cc06_g10450	GSCOC_T00041778001	-3.6178730498724	Senescence/dehydration-associated protein-related
Cc05_g04840	GSCOC_T00035020001	-3.61520780134809	Putative Septum-promoting GTP-binding protein 1
Cc06_g15420	GSCOC_T00030830001	-3.61391430901762	Putative Acidic mammalian chitinase
Cc08_g14470	GSCOC_T00030219001	-3.61110245907628	Putative O-glucosyltransferase rumi homolog
Cc02_g32290	GSCOC_T00012964001	-3.61036058148406	Putative unknown protein; Has 23 Blast hits to 23 proteins in 9 species
Cc03_g01370	GSCOC_T00025749001	-3.60491159856464	S-adenosyl-L-methionine-dependent methyltransferases superfamily protein
Cc02_g21030	GSCOC_T00014735001	-3.60363038288894	Root phototropism protein 3
Cc04_g15100	GSCOC_T00002593001	-3.59549500057359	Galactoside 2-alpha-L-fucosyltransferase
Cc08_g12830	GSCOC_T00030424001	-3.58700793634441	unknown protein; BEST Arabidopsis thaliana protein match is
Cc00_g16320	GSCOC_T00010874001	-3.58529225099531	Putative Probable receptor-like protein kinase At5g39030
Cc04_g00430	GSCOC_T00021652001	-3.58457946845947	Receptor-like protein kinase
Cc06_g22740	GSCOC_T00040675001	-3.58195684152267	Magnesium-protoporphyrin IX monomethyl ester [oxidative] cyclase, chloroplastic
Cc11_g16970	GSCOC_T00038251001	-3.57530048882577	Putative Uncharacterized GPI-anchored protein At1g27950
Cc11_g06880	GSCOC_T00020720001	-3.57396691668278	Putative peptide/nitrate transporter At2g38100
Cc06_g06900	GSCOC_T00031327001	-3.57324468425391	Fasciclin-like arabinogalactan protein 17
Cc10_g15250	GSCOC_T00033698001	-3.56241406557295	Probable LRR receptor-like serine/threonine-protein kinase At4g08850
Cc03_g03650	GSCOC_T00026060001	-3.5617436742927	Primary amine oxidase
Cc11_g02900	GSCOC_T00025510001	-3.56048388022472	Putative Probable disease resistance RPP8-like protein 2
Cc01_g02560	GSCOC_T00009683001	-3.56036109484553	Amino acid permease family protein
Cc02_g05340	GSCOC_T00039040001	-3.54158727991606	Putative Probably inactive leucine-rich repeat receptor-like protein kinase At3g28040
Cc06_g13390	GSCOC_T00041403001	-3.53456374596349	CASP-like protein 3
Cc09_g06610	GSCOC_T00005114001	-3.53085057986228	Photosystem I reaction center subunit III, chloroplastic
Cc06_g06270	GSCOC_T00031404001	-3.52934237562852	Putative Lysosomal Pro-X carboxypeptidase
Cc04_g05670	GSCOC_T00022331001	-3.52892367105073	Phospholipase A1-IIdelta
Cc08_g10660	GSCOC_T00027038001	-3.52829897354374	Putative FUNCTIONS IN
Cc06_g18940	GSCOC_T00028933001	-3.52081327721434	Putative Strictosidine synthase 1
Cc04_g08120	GSCOC_T00022662001	-3.52074988668397	Tropinone reductase homolog
Cc00_g19010	GSCOC_T00001295001	-3.51990566196962	Chalcone and stilbene synthase family protein
Cc07_g16400	GSCOC_T00037566001	-3.51970933513265	Probable WRKY transcription factor 51
Cc02_g39910	GSCOC_T00027643001	-3.51823150488238	IQ-domain 18
Cc01_g07620	GSCOC_T00009374001	-3.51294691253158	Hypothetical protein
Cc02_g07670	GSCOC_T00029906001	-3.50459247685554	Expansin-A4
Cc03_g13800	GSCOC_T00031735001	-3.50177733123177	Hypothetical protein
Cc11_g11670	GSCOC_T00032416001	-3.50096557433544	Putative uncharacterized protein
Cc11_g15340	GSCOC_T00038044001	-3.49755336559929	Putative Plant protein 1589 of unknown function
Cc03_g14880	GSCOC_T00026734001	-3.48937026397547	Putative disease resistance protein RGA4
Cc04_g07490	GSCOC_T00022569001	-3.48863008566035	Duplicated homeodomain-like superfamily protein
Cc07_g09850	GSCOC_T00037190001	-3.4852889051421	Mannan endo-1,4-beta-mannosidase 7
Cc10_g01870	GSCOC_T00024676001	-3.48301278413979	Filament-like plant protein 4
Cc11_g12510	GSCOC_T00032309001	-3.48198176148386	Probable S-acyltransferase At1g69420
Cc04_g07370	GSCOC_T00022553001	-3.47997750137795	Putative Protein ASPARTIC PROTEASE IN GUARD CELL 1
Cc02_g04550	GSCOC_T00020372001	-3.47619792144338	Hexose carrier protein HEX6
Cc08_g00560	GSCOC_T00038501001	-3.47487226748502	Putative Auxin-responsive protein IAA29
Cc00_g31160	GSCOC_T00012545001	-3.47300158148658	Putative Hydroxycinnamoyl-Coenzyme A shikimate/quinate hydroxycinnamoyltransferase
Cc02_g21800	GSCOC_T00014827001	-3.46285597572835	Aminotransferase ALD1
Cc07_g06540	GSCOC_T00039965001	-3.45761806401878	Putative Exostosin family protein
Cc06_g15000	GSCOC_T00030893001	-3.45756937285671	Putative DNA-3-methyladenine glycosylase 1
Cc01_g17810	GSCOC_T00016279001	-3.4550946090558	Putative Tetratricopeptide repeat (TPR)-like superfamily protein
Cc06_g12720	GSCOC_T00041501001	-3.44704610984304	Putative GDSL esterase/lipase 5
Cc02_g04920	GSCOC_T00038983001	-3.4465868697014	Metacaspase-1
Cc02_g20030	GSCOC_T00014604001	-3.44259768441176	Putative phytosulfokine 4 precursor
Cc02_g28170	GSCOC_T00025184001	-3.44235027947674	DNA topoisomerase 2
Cc02_g38260	GSCOC_T00027886001	-3.43988522588802	G-type lectin S-receptor-like serine/threonine-protein kinase SD2-2
Cc03_g05360	GSCOC_T00026285001	-3.43440029492022	Putative Auxin-induced protein 5NG4
Cc10_g08020	GSCOC_T00034451001	-3.43342143589189	Tubulin alpha-2 chain
Cc08_g01020	GSCOC_T00038438001	-3.43178661599115	alpha/beta-Hydrolases superfamily protein
Cc03_g14540	GSCOC_T00026671001	-3.42941248137952	Predicted protein
Cc08_g06890	GSCOC_T00025236001	-3.42798122928371	Putative Cytosolic sulfotransferase 15
Cc06_g16710	GSCOC_T00004122001	-3.41440775146317	Leucine-rich repeat receptor-like tyrosine-protein kinase At2g41820
Cc10_g13710	GSCOC_T00035247001	-3.41056754483913	Protein kinase protein with adenine nucleotide alpha hydrolases-like domain
Cc01_g16120	GSCOC_T00016479001	-3.4105210488176	Fimbrin-like protein 2
Cc09_g00470	GSCOC_T00017946001	-3.40991725160203	Hypothetical protein
Cc03_g12870	GSCOC_T00030645001	-3.40550139782872	Calmodulin-like protein 5
Cc08_g13310	GSCOC_T00030358001	-3.40308492392564	unknown protein; BEST Arabidopsis thaliana protein match is
Cc06_g17100	GSCOC_T00012653001	-3.39975018395116	Putative Magnesium-chelatase subunit H
Cc07_g06810	GSCOC_T00040006001	-3.39815458973243	Hypothetical protein
Cc06_g13090	GSCOC_T00041448001	-3.39684795347604	Peroxidase 16
Cc11_g02530	GSCOC_T00018513001	-3.39659913389002	Acidic endochitinase
Cc06_g06140	GSCOC_T00031420001	-3.39445628806633	NAC domain-containing protein 90
Cc06_g00550	GSCOC_T00023236001	-3.3930285795775	Putative WEB family protein At2g38370
Cc11_g10480	GSCOC_T00032571001	-3.39290772006634	Lysine histidine transporter-like 6
Cc04_g13580	GSCOC_T00018263001	-3.38853915393858	Putative Vegetative incompatibility protein HET-E-1
Cc02_g05130	GSCOC_T00039013001	-3.38491505361823	Probable inactive receptor kinase At5g58300
Cc05_g12550	GSCOC_T00021176001	-3.3839632675789	S-adenosyl-L-methionine-dependent methyltransferases superfamily protein
Cc09_g09090	GSCOC_T00023108001	-3.38368406645105	Putative Probable purine permease 10
Cc09_g06960	GSCOC_T00036341001	-3.38348927747755	Theobromine synthase 2
Cc10_g03570	GSCOC_T00024886001	-3.36676821777707	Allene oxide synthase, chloroplastic
Cc07_g08570	GSCOC_T00040236001	-3.36610263895771	Non-specific lipid-transfer protein 2
Cc00_g05290	GSCOC_T00010372001	-3.36552015557077	Putative Probable leucine-rich repeat receptor-like protein kinase At1g35710
Cc07_g14790	GSCOC_T00036568001	-3.36457955991396	Putative Probable serine/threonine-protein kinase Cx32, chloroplastic
Cc09_g09500	GSCOC_T00003714001	-3.36344277922646	Chlorophyll a-b binding protein 36, chloroplastic
Cc00_g11830	GSCOC_T00007748001	-3.35582179288353	Putative Octicosapeptide/Phox/Bem1p family protein
Cc10_g07700	GSCOC_T00034489001	-3.34850129053511	Putative Transcription factor bHLH74
Cc05_g05300	GSCOC_T00035097001	-3.34723737562871	Protein of unknown function (DUF1218)
Cc11_g06970	GSCOC_T00020735001	-3.34481762115046	RNA-dependent RNA polymerase 1
Cc05_g06040	GSCOC_T00035208001	-3.34050192847593	Heat shock 70 kDa protein 4
Cc03_g04070	GSCOC_T00026114001	-3.33498401745722	Type I inositol 1,4,5-trisphosphate 5-phosphatase CVP2
Cc03_g04140	GSCOC_T00026123001	-3.3332756595433	Putative Kinase interacting (KIP1-like) family protein
Cc00_g11980	GSCOC_T00010413001	-3.33030631988479	Putative Probable LRR receptor-like serine/threonine-protein kinase At4g08850
Cc06_g16330	GSCOC_T00030708001	-3.32921494840448	Cytochrome P450 93A1
Cc00_g24050	GSCOC_T00009221001	-3.32425791097163	Putative Dehydration-responsive protein RD22
Cc02_g04990	GSCOC_T00038996001	-3.32401298380923	Putative uncharacterized protein
Cc00_g21850	GSCOC_T00013635001	-3.323320715037	Putative UDP-glycosyltransferase 83A1
Cc06_g10460	GSCOC_T00041776001	-3.32239869544677	Putative Cytochrome b5
Cc00_g22710	GSCOC_T00002421001	-3.31548690399805	Putative Protein of unknown function (DUF581)
Cc02_g19710	GSCOC_T00014544001	-3.31439581670942	Family of unknown function (DUF566) _x0001_
Cc08_g10500	GSCOC_T00027018001	-3.31430468254102	Putative uncharacterized protein
Cc00_g23530	GSCOC_T00009087001	-3.31332784223282	Serine carboxypeptidase-like 13
Cc09_g03020	GSCOC_T00017599001	-3.31138065017389	Ammonium transporter 1 member 2
Cc00_g29860	GSCOC_T00006999001	-3.31082213132675	unknown protein; BEST Arabidopsis thaliana protein match is
Cc08_g06750	GSCOC_T00005866001	-3.30732134835737	Putative Protein ASPARTIC PROTEASE IN GUARD CELL 2
Cc10_g16360	GSCOC_T00011268001	-3.30717290827989	Hypothetical protein
Cc11_g03400	GSCOC_T00025419001	-3.30494845364229	Putative Disease resistance protein RPM1
Cc07_g04690	GSCOC_T00039726001	-3.30321064095289	Hypothetical protein
Cc02_g29920	GSCOC_T00038920001	-3.30046085025628	Putative disease resistance protein At3g14460
Cc00_g24720	GSCOC_T00004719001	-3.29803064691333	Monomethylxanthine methyltransferase 1
Cc07_g05790	GSCOC_T00039860001	-3.29638518040867	Peptidyl-prolyl cis-trans isomerase CYP40
Cc09_g06080	GSCOC_T00033365001	-3.29583680792471	Putative Probable LRR receptor-like serine/threonine-protein kinase At3g47570
Cc02_g17620	GSCOC_T00014282001	-3.28685452609856	Glucan endo-1,3-beta-glucosidase 7
Cc02_g10370	GSCOC_T00029536001	-3.28623601576067	Putative Bark storage protein A
Cc03_g00600	GSCOC_T00025645001	-3.27439151675163	Putative Plant invertase/pectin methylesterase inhibitor superfamily protein
Cc01_g06150	GSCOC_T00027453001	-3.27218216097732	Putative LRR receptor-like serine/threonine-protein kinase GSO1
Cc07_g15490	GSCOC_T00036469001	-3.26880150662229	Putative G-type lectin S-receptor-like serine/threonine-protein kinase RLK1
Cc02_g12260	GSCOC_T00029307001	-3.26762190161471	Major facilitator superfamily protein
Cc11_g05210	GSCOC_T00020462001	-3.26597780882492	Glutamate decarboxylase 4
Cc01_g17940	GSCOC_T00016262001	-3.26528579895844	Putative Probable leucine-rich repeat receptor-like protein kinase At1g35710
Cc07_g17860	GSCOC_T00018835001	-3.26284058989533	Putative Transducin/WD40 repeat-like superfamily protein
Cc00_g14180	GSCOC_T00009212001	-3.25793770805245	Cytochrome P450 85A1
Cc00_g22120	GSCOC_T00009092001	-3.25242427224912	Putative MLP-like protein 28
Cc01_g08980	GSCOC_T00023938001	-3.24610580394428	Late embryogenesis abundant (LEA) hydroxyproline-rich glycoprotein family
Cc07_g08290	GSCOC_T00040198001	-3.24537610462237	unknown protein; FUNCTIONS IN
Cc02_g34690	GSCOC_T00000730001	-3.24118061397416	Putative uncharacterized protein
Cc08_g07730	GSCOC_T00011861001	-3.23943267372562	Hypothetical protein
Cc06_g15930	GSCOC_T00030756001	-3.23937207283973	Putative Flavonol 3-sulfotransferase
Cc00_g32030	GSCOC_T00008801001	-3.23251885757244	Chalcone and stilbene synthase family protein
Cc07_g07090	GSCOC_T00040045001	-3.23068133839656	Protein SHORT-ROOT
Cc10_g12130	GSCOC_T00031902001	-3.22862361453572	Putative Probable signal recognition particle 43 kDa protein, chloroplastic
Cc00_g26730	GSCOC_T00003169001	-3.22852127229885	Anthocyanidin 5,3-O-glucosyltransferase
Cc00_g25410	GSCOC_T00007756001	-3.22829393676727	Putative Protein of unknown function (DUF674)
Cc11_g06940	GSCOC_T00020732001	-3.22664710940826	RNA-dependent RNA polymerase 1
Cc04_g11200	GSCOC_T00037284001	-3.22569476662174	Cytochrome P450 71A1
Cc01_g13590	GSCOC_T00028331001	-3.22392481825155	Putative Protein of unknown function (DUF3527)
Cc07_g07960	GSCOC_T00040158001	-3.22019435443286	Putative uncharacterized protein
Cc00_g00590	GSCOC_T00036153001	-3.21651329387182	Putative Probable receptor-like protein kinase At5g39020
Cc02_g18060	GSCOC_T00014339001	-3.20971445384482	Cysteine/Histidine-rich C1 domain family protein
Cc02_g36580	GSCOC_T00003906001	-3.20727761165796	Putative Probable calcium-binding protein CML10
Cc05_g05650	GSCOC_T00035140001	-3.20092921334419	Calcium-binding protein PBP1
Cc01_g15310	GSCOC_T00016578001	-3.19563158126886	RING-H2 finger protein ATL73
Cc07_g02790	GSCOC_T00039486001	-3.19460629696107	ABC transporter B family member 15
Cc07_g09050	GSCOC_T00040299001	-3.19443697349263	Putative Transcription factor AS1
Cc02_g09420	GSCOC_T00029657001	-3.19294125184383	INVOLVED IN
Cc00_g22090	GSCOC_T00011254001	-3.18539225873124	Putative Disease resistance protein At4g27190
Cc07_g07780	GSCOC_T00040138001	-3.18093626980832	Auxin-responsive protein IAA9
Cc00_g35810	GSCOC_T00011675001	-3.17627055871304	Putative Cytochrome P450 86B1
Cc09_g03330	GSCOC_T00017563001	-3.17425144119907	Dynamin-related protein 4C
Cc00_g30920	GSCOC_T00002387001	-3.16964889296284	unknown protein; FUNCTIONS IN
Cc01_g10770	GSCOC_T00024183001	-3.16773260806727	Putative Cysteine proteinases superfamily protein
Cc00_g00310	GSCOC_T00036111001	-3.16463391001893	Putative Probable protein phosphatase 2C 43
Cc10_g04260	GSCOC_T00034956001	-3.15528284864197	Putative BRI1 kinase inhibitor 1
Cc06_g13870	GSCOC_T00041336001	-3.15220128734614	Putative unknown protein; FUNCTIONS IN
Cc04_g13030	GSCOC_T00011367001	-3.14960185148574	Putative unknown protein; FUNCTIONS IN
Cc06_g19980	GSCOC_T00022889001	-3.14915506069008	Putative Endoribonuclease Dicer homolog 2
Cc06_g05820	GSCOC_T00043149001	-3.14894972636744	Putative unknown protein; BEST Arabidopsis thaliana protein match is
Cc05_g10400	GSCOC_T00021451001	-3.14815769692295	Putative Heme-binding protein 2
Cc00_g17490	GSCOC_T00008151001	-3.14785978767878	Protein ASPARTIC PROTEASE IN GUARD CELL 1
Cc01_g02540	GSCOC_T00009688001	-3.14673241985751	Amino acid permease family protein
Cc06_g06460	GSCOC_T00031380001	-3.14655210771485	NDR1/HIN1-like 1
Cc02_g37110	GSCOC_T00028036001	-3.14415413579783	SPX domain-containing membrane protein At4g22990
Cc09_g06970	GSCOC_T00036338001	-3.14408340949281	7-methylxanthosine synthase 1
Cc07_g03750	GSCOC_T00039620001	-3.14407556796785	Lamin-like protein
Cc11_g12840	GSCOC_T00032259001	-3.14401726746004	Mitochondrial transcription termination factor family protein
Cc06_g16200	GSCOC_T00030724001	-3.14397894858462	Putative disease resistance protein At1g50180
Cc05_g04270	GSCOC_T00031641001	-3.14119413630928	Hypothetical protein
Cc03_g08210	GSCOC_T00033219001	-3.13830069559058	Putative UPF0481 protein At3g47200
Cc01_g14550	GSCOC_T00028457001	-3.13691961271337	Putative BAG family molecular chaperone regulator 4
Cc00_g05620	GSCOC_T00011946001	-3.13505244819428	Putative amidase C869.01
Cc02_g07100	GSCOC_T00009472001	-3.12875181096048	Uncharacterized protein
Cc02_g24700	GSCOC_T00028852001	-3.12053015188169	Putative Zinc finger protein ZAT9
Cc02_g35750	GSCOC_T00042800001	-3.11941353438559	Probable receptor-like protein kinase At2g42960
Cc10_g04880	GSCOC_T00034882001	-3.11856301610935	Protein of unknown function (DUF3223)
Cc02_g15200	GSCOC_T00013961001	-3.11558100255253	Nucleobase-ascorbate transporter 2
Cc07_g16410	GSCOC_T00037565001	-3.11524746929331	Ras-related protein Rab7
Cc09_g01830	GSCOC_T00017758001	-3.11339771531845	unknown protein; FUNCTIONS IN
Cc05_g15540	GSCOC_T00038678001	-3.11242458204724	Probable amino acid permease 7
Cc06_g01460	GSCOC_T00023365001	-3.10947120802288	Chlorophyll a-b binding protein CP29.2, chloroplastic
Cc01_g12020	GSCOC_T00028122001	-3.10909226738542	Chitinase 2
Cc00_g27770	GSCOC_T00012253001	-3.10878894405149	Putative Probable leucine-rich repeat receptor-like protein kinase At1g35710
Cc06_g20650	GSCOC_T00023014001	-3.10854924826889	Putative Polynucleotidyl transferase, ribonuclease H-like superfamily protein
Cc04_g16540	GSCOC_T00035759001	-3.10530048425199	Putative uncharacterized protein
Cc03_g06240	GSCOC_T00026414001	-3.10340117834413	Putative Protein of unknown function (DUF3527)
Cc08_g13560	GSCOC_T00030330001	-3.09860147354361	Guard cell S-type anion channel SLAC1
Cc10_g03880	GSCOC_T00024929001	-3.09711480161086	Protein of unknown function, DUF617
Cc02_g00650	GSCOC_T00019854001	-3.0912891625259	UNC93-like protein 2
Cc02_g29650	GSCOC_T00009344001	-3.08812185473035	Putative Aspartic proteinase nepenthesin-2
Cc07_g00480	GSCOC_T00019120001	-3.08766012111511	Mitochondrial ribosomal protein L37
Cc00_g26370	GSCOC_T00002364001	-3.07642198847794	Putative amidase C869.01
Cc08_g01670	GSCOC_T00038348001	-3.07368299568508	Putative Disease resistance protein RPM1
Cc06_g23550	GSCOC_T00040554001	-3.06652988794163	Organic cation/carnitine transporter 7
Cc01_g02440	GSCOC_T00009708001	-3.06472150300653	Serine carboxypeptidase-like 18
Cc04_g13490	GSCOC_T00018274001	-3.06453354759475	G-type lectin S-receptor-like serine/threonine-protein kinase At4g03230
Cc05_g06080	GSCOC_T00009858001	-3.06170855601791	Putative late blight resistance protein homolog R1A-6
Cc08_g12320	GSCOC_T00030499001	-3.06140797375214	Putative DUF246 domain-containing protein At1g04910
Cc11_g11660	GSCOC_T00032417001	-3.06109590412581	Putative uncharacterized protein
Cc02_g10200	GSCOC_T00029554001	-3.05845634489162	Putative Receptor-like protein kinase FERONIA
Cc04_g15550	GSCOC_T00042327001	-3.05738167443885	Protein of unknown function (DUF1118)
Cc08_g03920	GSCOC_T00034191001	-3.05383953253554	Putative Cytochrome P450 76C4
Cc07_g04120	GSCOC_T00039663001	-3.05225644730435	Predicted protein
Cc02_g31950	GSCOC_T00027468001	-3.05160578382652	Putative UDP-glycosyltransferase 83A1
Cc11_g16910	GSCOC_T00038243001	-3.04954365880996	Chlorophyll a-b binding protein, chloroplastic
Cc04_g10900	GSCOC_T00042667001	-3.04335830724711	Putative CONTAINS InterPro DOMAIN/s
Cc03_g15460	GSCOC_T00026827001	-3.04282616019014	Putative Chaperone protein dnaJ 20, chloroplastic
Cc07_g08740	GSCOC_T00040262001	-3.0373982567872	Putative unknown protein; FUNCTIONS IN
Cc02_g05410	GSCOC_T00039049001	-3.03707807031672	Transcription factor RF2b
Cc03_g02320	GSCOC_T00025874001	-3.03475132197375	NAD(P)-binding Rossmann-fold superfamily protein
Cc00_g29330	GSCOC_T00011480001	-3.03255581653072	Putative Predicted protein
Cc02_g23810	GSCOC_T00015084001	-3.03217652285834	NAC domain containing protein 35
Cc11_g15590	GSCOC_T00038076001	-3.03138980155663	Putative unknown protein; BEST Arabidopsis thaliana protein match is
Cc04_g14640	GSCOC_T00040722001	-3.02772426441148	L-type lectin-domain containing receptor kinase IV.2
Cc08_g10680	GSCOC_T00027041001	-3.02461369609167	Putative Fatty acid desaturase 1
Cc05_g13120	GSCOC_T00021103001	-3.02173843164489	zinc finger protein-related
Cc07_g20620	GSCOC_T00007211001	-3.01986476179863	Putative Probable disease resistance protein At5g63020
Cc00_g12110	GSCOC_T00002210001	-3.01708432891221	Protein of unknown function (DUF1118)
Cc01_g18800	GSCOC_T00016154001	-3.01581689922304	Photosystem II reaction center W protein, chloroplastic
Cc07_g11750	GSCOC_T00036964001	-3.01345088310767	Undecaprenyl diphosphate synthase, putative
Cc07_g09500	GSCOC_T00037231001	-3.01014825459106	Putative Phosphatidylinositol transfer protein PDR16
Cc07_g15380	GSCOC_T00036482001	-3.00845837229465	Probable trehalose-phosphate phosphatase J
Cc00_g02110	GSCOC_T00001848001	-3.00401538237085	Putative Disease resistance protein At4g27190
Cc03_g14460	GSCOC_T00026663001	-3.0032170923315	Putative Rhodanese/Cell cycle control phosphatase superfamily protein
Cc01_g16680	GSCOC_T00016412001	-3.00252498335058	Putative Predicted protein
Cc10_g03950	GSCOC_T00034996001	-2.99526062874648	Protein of unknown function, DUF547
Cc00_g20770	GSCOC_T00008849001	-2.98676890518405	Caffeic acid 3-O-methyltransferase
Cc05_g15330	GSCOC_T00038705001	-2.98540531737881	Peptidyl-prolyl cis-trans isomerase FKBP16-1, chloroplastic
Cc01_g09290	GSCOC_T00023979001	-2.97797312041033	Transcription factor TGA2
Cc06_g10350	GSCOC_T00041790001	-2.97470945199805	Putative Probable RNA-dependent RNA polymerase 5
Cc06_g17200	GSCOC_T00036351001	-2.97282689488857	Myb-related protein 306
Cc08_g17120	GSCOC_T00035698001	-2.97166570704624	Probable aquaporin NIP5-1
Cc06_g06890	GSCOC_T00031328001	-2.96972540398318	Putative Uncharacterized protein
Cc06_g06000	GSCOC_T00043170001	-2.96931365638339	Rho GTPase activating protein with PAK-box/P21-Rho-binding domain
Cc03_g12920	GSCOC_T00030637001	-2.96917881784461	Serine/threonine-protein kinase-like protein ACR4
Cc10_g00910	GSCOC_T00024551001	-2.96907374113859	L-ascorbate oxidase homolog
Cc05_g10950	GSCOC_T00021378001	-2.96316948126066	NHL domain-containing protein
Cc02_g39980	GSCOC_T00027634001	-2.9612239373881	Thylakoid membrane phosphoprotein 14 kDa, chloroplastic
Cc02_g39070	GSCOC_T00027768001	-2.95864857915802	Putative Protein of unknown function (DUF3133)
Cc04_g16560	GSCOC_T00035761001	-2.95794598393422	Geranylgeranyl diphosphate reductase, chloroplastic
Cc10_g04620	GSCOC_T00034914001	-2.95521723771078	Probable serine/threonine-protein kinase At1g01540
Cc08_g11220	GSCOC_T00027119001	-2.95341860044886	peptidyl-prolyl cis-trans isomerases
Cc00_g18980	GSCOC_T00003157001	-2.94676286677776	Putative Probable receptor-like protein kinase At5g39020
Cc02_g12060	GSCOC_T00029336001	-2.94670357728108	Receptor-like serine/threonine-protein kinase SD1-8
Cc11_g14050	GSCOC_T00032110001	-2.94256857775397	Two-component response regulator ARR3
Cc08_g13160	GSCOC_T00030375001	-2.93961315901193	Primary amine oxidase
Cc07_g10170	GSCOC_T00037152001	-2.9390742516415	3-epi-6-deoxocathasterone 23-monooxygenase
Cc02_g05700	GSCOC_T00039085001	-2.9369146534284	BEST Arabidopsis thaliana protein match is
Cc11_g08640	GSCOC_T00032846001	-2.93478910124407	Uncharacterized protein
Cc10_g01310	GSCOC_T00024601001	-2.93467253950022	Probable cinnamyl alcohol dehydrogenase 6
Cc05_g12020	GSCOC_T00021242001	-2.93423359642507	Protein kinase superfamily protein
Cc05_g09930	GSCOC_T00021522001	-2.93234474961395	Chlorophyll a-b binding protein 8, chloroplastic
Cc11_g04990	GSCOC_T00020432001	-2.927979584637	Receptor-like protein kinase FERONIA
Cc02_g22650	GSCOC_T00014942001	-2.92785461943803	Probable receptor-like protein kinase At1g11050
Cc00_g08570	GSCOC_T00005643001	-2.92533033690995	Putative Probable leucine-rich repeat receptor-like protein kinase At1g35710
Cc07_g00630	GSCOC_T00019141001	-2.92482375690323	Putative Probable inactive leucine-rich repeat receptor-like protein kinase At3g03770
Cc05_g05550	GSCOC_T00035128001	-2.92411007280921	Putative Disease resistance RPP13-like protein 4
Cc02_g31310	GSCOC_T00027586001	-2.92391123528249	Probable RNA helicase SDE3
Cc10_g07710	GSCOC_T00034488001	-2.91883816039367	Transcription factor bHLH74
Cc00_g25800	GSCOC_T00009824001	-2.91599727364601	Hypothetical protein
Cc00_g12700	GSCOC_T00012642001	-2.91110378298631	Putative Cysteine/Histidine-rich C1 domain family protein
Cc03_g12930	GSCOC_T00030635001	-2.90148047838089	Hypothetical protein
Cc02_g13600	GSCOC_T00029126001	-2.89783190856218	Squamosa promoter-binding protein 1
Cc11_g14310	GSCOC_T00032073001	-2.89368819961339	unknown protein; FUNCTIONS IN
Cc04_g16030	GSCOC_T00042393001	-2.88659455138008	Putative Transcription factor bHLH79
Cc11_g16230	GSCOC_T00038159001	-2.88322779402456	Photosystem II core complex proteins psbY, chloroplastic
Cc06_g13690	GSCOC_T00041358001	-2.88170145020243	Putative Zinc finger protein CONSTANS-LIKE 4
Cc06_g07600	GSCOC_T00031241001	-2.8761382672941	Putative BEST Arabidopsis thaliana protein match is
Cc10_g09590	GSCOC_T00031523001	-2.87517716112302	Hypothetical protein
Cc02_g36950	GSCOC_T00003852001	-2.87500407888208	Nectarin-1
Cc05_g06700	GSCOC_T00042174001	-2.87469757492893	Probable indole-3-acetic acid-amido synthetase GH3.5
Cc11_g13640	GSCOC_T00032156001	-2.8615619387939	Putative DnaJ homolog subfamily B member 1
Cc11_g12220	GSCOC_T00032345001	-2.85941639952598	Alpha-1,4 glucan phosphorylase L-2 isozyme, chloroplastic/amyloplastic
Cc04_g08280	GSCOC_T00022683001	-2.85800332117451	Putative movement protein binding protein 2C
Cc05_g03560	GSCOC_T00033582001	-2.85224032684514	Putative Cysteine-rich receptor-like protein kinase 25
Cc05_g09090	GSCOC_T00002673001	-2.85167358263337	Putative late blight resistance protein homolog R1B-8
Cc05_g08190	GSCOC_T00016833001	-2.8477688305525	CMV 1a interacting protein 1
Cc05_g08800	GSCOC_T00016912001	-2.84459577411218	Secologanin synthase
Cc08_g00260	GSCOC_T00005584001	-2.84386154783672	Flotillin-like protein 1
Cc00_g30450	GSCOC_T00013101001	-2.84212350348494	Copper amine oxidase family protein
Cc06_g04540	GSCOC_T00042966001	-2.83973512433993	Ras-related protein RABE1a
Cc00_g03400	GSCOC_T00012866001	-2.83901115611458	Protein SPIRAL1-like 1
Cc07_g17010	GSCOC_T00037486001	-2.83882500248121	Putative Auxin-induced protein 5NG4
Cc01_g04780	GSCOC_T00028526001	-2.83856221600198	Phospholipase A1-Igamma3, chloroplastic
Cc02_g09700	GSCOC_T00029620001	-2.83670189898726	Germin-like protein subfamily 3 member 2
Cc08_g07270	GSCOC_T00025342001	-2.83342157184403	Probable LRR receptor-like serine/threonine-protein kinase At1g14390
Cc10_g00410	GSCOC_T00024491001	-2.827479707535	Glyceraldehyde-3-phosphate dehydrogenase B, chloroplastic
Cc07_g15530	GSCOC_T00036464001	-2.82657314023181	Inositol-3-phosphate synthase
Cc02_g26750	GSCOC_T00024978001	-2.82419130219676	Plant protein of unknown function (DUF946)
Cc08_g01290	GSCOC_T00038406001	-2.82355278025225	Thermospermine synthase ACAULIS5
Cc06_g18920	GSCOC_T00028931001	-2.82051188867192	Two-component response regulator ARR9
Cc05_g13520	GSCOC_T00021052001	-2.81411473397926	Microtubule-associated protein TORTIFOLIA1
Cc00_g31870	GSCOC_T00001691001	-2.81346892435547	Putative Glutathione transferase GST 23
Cc05_g06370	GSCOC_T00042124001	-2.81257483940729	Putative uncharacterized protein
Cc04_g03070	GSCOC_T00021996001	-2.81192159707241	D-isomer specific 2-hydroxyacid dehydrogenase family protein
Cc03_g07800	GSCOC_T00026644001	-2.81032271717755	Receptor like protein kinase S.2
Cc02_g32550	GSCOC_T00001231001	-2.80988613449777	Putative Protein of unknown function DUF679
Cc09_g02950	GSCOC_T00017609001	-2.80184766407028	Putative Auxin-induced protein 5NG4
Cc04_g12980	GSCOC_T00011361001	-2.80024886820053	Rac-like GTP-binding protein 3
Cc09_g03510	GSCOC_T00017540001	-2.7925334372468	Protein of unknown function (DUF707)
Cc03_g07320	GSCOC_T00026577001	-2.7899106421744	Chalcone synthase
Cc02_g25580	GSCOC_T00028731001	-2.78628804975871	E3 ubiquitin-protein ligase ATL4
Cc11_g15800	GSCOC_T00038100001	-2.78074349433806	BTB/POZ domain-containing protein At1g67900
Cc04_g05930	GSCOC_T00022367001	-2.77646992383203	Serine carboxypeptidase-like 45
Cc09_g03980	GSCOC_T00017480001	-2.77583259801954	Endoribonuclease Dicer homolog 2
Cc04_g05860	GSCOC_T00022355001	-2.77499408745219	Hypothetical protein
Cc10_g07320	GSCOC_T00034538001	-2.77290495373299	unknown protein; BEST Arabidopsis thaliana protein match is
Cc03_g00620	GSCOC_T00025647001	-2.77288993531223	Putative uncharacterized protein
Cc02_g10180	GSCOC_T00029557001	-2.77179652213276	Putative receptor-like protein kinase At5g39000
Cc10_g08350	GSCOC_T00034398001	-2.76997219616876	Putative Rhamnogalacturonate lyase
Cc08_g10820	GSCOC_T00027061001	-2.76557182299664	Putative Thromboxane-A synthase
Cc00_g29890	GSCOC_T00005407001	-2.76257280248239	Putative Probable carboxylesterase 7
Cc01_g16990	GSCOC_T00016376001	-2.76143902356441	Probable LRR receptor-like serine/threonine-protein kinase At5g48740
Cc01_g05240	GSCOC_T00011454001	-2.76049343717965	Putative disease resistance protein RGA3
Cc08_g05270	GSCOC_T00007026001	-2.75225719049177	Putative disease resistance protein RGA1
Cc08_g17170	GSCOC_T00035706001	-2.7513078332745	Probable methyltransferase PMT18
Cc03_g03590	GSCOC_T00026052001	-2.75029489827651	Photosystem I reaction center subunit II, chloroplastic
Cc03_g04660	GSCOC_T00026193001	-2.74114930332474	Auxin-induced protein 22B
Cc04_g12420	GSCOC_T00005302001	-2.74040206955488	Putative uncharacterized protein
Cc06_g18960	GSCOC_T00028935001	-2.74029701513925	Putative N-acylneuraminate-9-phosphatase
Cc00_g21080	GSCOC_T00001401001	-2.73829681209196	Putative Disease resistance protein At4g27190
Cc10_g13070	GSCOC_T00035347001	-2.73808864909432	Putative Cyanidin-3-O-glucoside 2-O-glucuronosyltransferase
Cc05_g06850	GSCOC_T00042200001	-2.73668273817281	Protochlorophyllide reductase, chloroplastic
Cc01_g12260	GSCOC_T00028156001	-2.7364250354976	Aquaporin TIP1-1
Cc05_g01750	GSCOC_T00015751001	-2.73448938450554	Cytochrome P450 82G1
Cc08_g03510	GSCOC_T00034133001	-2.73342335770103	Cellulose synthase-like protein D3
Cc01_g15890	GSCOC_T00016506001	-2.73335187448872	Photosystem I reaction center subunit XI, chloroplastic
Cc07_g08090	GSCOC_T00040171001	-2.73305714611229	Protein kinase superfamily protein
Cc00_g12750	GSCOC_T00001612001	-2.7319974484927	Putative Hydroxycinnamoyl-Coenzyme A shikimate/quinate hydroxycinnamoyltransferase
Cc08_g14520	GSCOC_T00030212001	-2.72508597963512	Putative copper-transporting ATPase HMA5
Cc01_g21080	GSCOC_T00005024001	-2.7240526467527	Hypothetical protein
Cc05_g09520	GSCOC_T00021572001	-2.72338355378147	Pentatricopeptide repeat-containing protein At2g42920, chloroplastic
Cc05_g00780	GSCOC_T00013169001	-2.71427043400943	Acidic endochitinase
Cc02_g12370	GSCOC_T00029291001	-2.71405936293685	ARM repeat superfamily protein
Cc02_g34060	GSCOC_T00000637001	-2.7078766103015	Putative Transcription factor bHLH19
Cc07_g06410	GSCOC_T00039944001	-2.70297061603882	Cyclin-D3-1
Cc03_g14000	GSCOC_T00031781001	-2.70290745193447	Putative Protein of unknown function (DUF1644)
Cc04_g01580	GSCOC_T00021815001	-2.70154232790569	Putative uncharacterized protein
Cc07_g06870	GSCOC_T00040013001	-2.70151618457998	Peroxidase 73
Cc06_g12120	GSCOC_T00041574001	-2.69693191616113	Acyl-CoA N-acyltransferases (NAT) superfamily protein
Cc05_g03500	GSCOC_T00033572001	-2.69639582329237	Putative Protein ASPARTIC PROTEASE IN GUARD CELL 1
Cc03_g15540	GSCOC_T00026839001	-2.69418569427458	Putative Predicted protein
Cc11_g03770	GSCOC_T00033974001	-2.69111697964349	Putative Disease resistance protein (CC-NBS-LRR class) family
Cc07_g05910	GSCOC_T00039878001	-2.6900802430246	Putative uncharacterized protein
Cc02_g19160	GSCOC_T00014480001	-2.68851424061568	Putative Polygalacturonase inhibitor 1
Cc06_g06960	GSCOC_T00031320001	-2.6869696076194	ABC transporter G family member 22
Cc10_g11640	GSCOC_T00001438001	-2.68687753722388	Acyl-CoA N-acyltransferases (NAT) superfamily protein
Cc08_g09750	GSCOC_T00026921001	-2.68622988183222	Probably inactive leucine-rich repeat receptor-like protein kinase At2g25790
Cc08_g07790	GSCOC_T00011873001	-2.68478437880115	3-ketoacyl-CoA synthase 10
Cc11_g00220	GSCOC_T00019447001	-2.68284902372873	Putative Probable galactinol--sucrose galactosyltransferase 2
Cc08_g09360	GSCOC_T00017288001	-2.68102975965408	Probable peptide transporter At1g52190
Cc00_g33660	GSCOC_T00007656001	-2.68030455651793	Putative Protein kinase superfamily protein
Cc09_g07580	GSCOC_T00036236001	-2.67864567310278	Tubulin beta-3 chain
Cc06_g01610	GSCOC_T00023388001	-2.67797020977907	Homeodomain-like transcriptional regulator
Cc02_g17970	GSCOC_T00014329001	-2.67770110451528	Protein TIC 62, chloroplastic
Cc06_g15140	GSCOC_T00030875001	-2.67558773901264	Putative Reticulon-like protein B21
Cc07_g11890	GSCOC_T00036944001	-2.67399873106038	WUSCHEL-related homeobox 8
Cc05_g04460	GSCOC_T00031672001	-2.66820306452331	Putative NB-ARC domain-containing disease resistance protein
Cc00_g11970	GSCOC_T00010411001	-2.66524885433072	Putative Probable LRR receptor-like serine/threonine-protein kinase At4g08850
Cc08_g15720	GSCOC_T00035513001	-2.66436698274165	Putative unknown protein; BEST Arabidopsis thaliana protein match is
Cc10_g01080	GSCOC_T00024574001	-2.66403402550818	Plastocyanin, chloroplastic
Cc06_g07710	GSCOC_T00031225001	-2.65631112357379	Heparanase-like protein 3
Cc10_g05790	GSCOC_T00034765001	-2.65612893105573	no pollen germination related 1
Cc06_g10640	GSCOC_T00041753001	-2.65061035375463	Glucan endo-1,3-beta-glucosidase 13
Cc06_g02700	GSCOC_T00023529001	-2.64794563941696	Actin
Cc10_g13900	GSCOC_T00035223001	-2.64309379030342	Putative Probable serine/threonine-protein kinase NAK
Cc08_g13490	GSCOC_T00030338001	-2.6420468308182	Putative uncharacterized protein
Cc11_g16670	GSCOC_T00038210001	-2.63867811409371	Putative 4-coumarate--CoA ligase-like 5
Cc02_g08410	GSCOC_T00029796001	-2.63841865097777	Putative Core-2/I-branching beta-1,6-N-acetylglucosaminyltransferase family protein
Cc00_g00260	GSCOC_T00036104001	-2.63711683921245	Putative Uncharacterized protein At1g28695
Cc11_g16260	GSCOC_T00038162001	-2.63645861167034	Putative Estradiol 17-beta-dehydrogenase 12
Cc02_g38150	GSCOC_T00027901001	-2.63456243882325	Cytochrome P450 86A2
Cc05_g08480	GSCOC_T00016870001	-2.63417153800133	Peroxidase 4
Cc07_g04770	GSCOC_T00039738001	-2.6331156623677	Protein NSP-INTERACTING KINASE 1
Cc01_g09770	GSCOC_T00024043001	-2.63160601324192	Nucleobase-ascorbate transporter 12
Cc06_g20000	GSCOC_T00022891001	-2.63051232264373	Receptor-like protein kinase FERONIA
Cc03_g05670	GSCOC_T00026332001	-2.63015506282765	Putative COP1-interacting protein-related
Cc05_g13240	GSCOC_T00021089001	-2.62726017174664	unknown protein; FUNCTIONS IN
Cc05_g08180	GSCOC_T00016832001	-2.62699293844288	Putative uncharacterized protein OSJNBa0095J15.6
Cc01_g07240	GSCOC_T00030156001	-2.62674832895678	Putative 1-aminocyclopropane-1-carboxylate oxidase homolog 12
Cc10_g07490	GSCOC_T00034515001	-2.62629191056048	Probable beta-D-xylosidase 7
Cc04_g16160	GSCOC_T00042408001	-2.62473075945668	Putative Microtubule-associated protein TORTIFOLIA1
Cc02_g19580	GSCOC_T00014526001	-2.62214920429703	Putative Zinc finger SWIM domain-containing protein 7
Cc07_g00930	GSCOC_T00019175001	-2.61863664346847	unknown protein; FUNCTIONS IN
Cc11_g07670	GSCOC_T00018020001	-2.6155348140677	Putative late blight resistance protein homolog R1A-6
Cc06_g07510	GSCOC_T00031252001	-2.61412029987678	Putative uncharacterized protein
Cc07_g06250	GSCOC_T00039924001	-2.61343895495716	Probable inactive receptor kinase At5g67200
Cc00_g29600	GSCOC_T00002220001	-2.61253594183408	Cellulose synthase-like protein B6
Cc05_g00800	GSCOC_T00013171001	-2.61188350801436	Hevamine-A
Cc10_g08340	GSCOC_T00034400001	-2.61184501397032	Putative Rhamnogalacturonate lyase
Cc07_g02590	GSCOC_T00039457001	-2.60351120786608	Peroxidase 63
Cc01_g18350	GSCOC_T00016216001	-2.60172331441879	Putative uncharacterized protein
Cc05_g15930	GSCOC_T00038624001	-2.59972105153667	Photosystem II 10 kDa polypeptide, chloroplastic
Cc01_g12910	GSCOC_T00028243001	-2.59696443411681	Triosephosphate isomerase, cytosolic
Cc04_g04430	GSCOC_T00022168001	-2.59594921172354	PTI1-like tyrosine-protein kinase At3g15890
Cc02_g06160	GSCOC_T00039141001	-2.59473130819087	Putative myb-like HTH transcriptional regulator family protein
Cc03_g08990	GSCOC_T00042733001	-2.59290035452048	Putative Probable carboxylesterase 7
Cc00_g31460	GSCOC_T00011251001	-2.59165908221706	Putative UDP-rhamnose
Cc02_g26240	GSCOC_T00028635001	-2.59017710363358	Putative RING-H2 finger protein ATL52
Cc04_g09340	GSCOC_T00022817001	-2.58956014471027	Potassium channel SKOR
Cc04_g03020	GSCOC_T00021988001	-2.58930060686656	Putative Uncharacterized protein At4g01150, chloroplastic
Cc00_g05070	GSCOC_T00000066001	-2.58545209000143	Putative Probable LRR receptor-like serine/threonine-protein kinase At4g36180
Cc01_g15390	GSCOC_T00016566001	-2.5832834050213	Probable inactive receptor kinase At5g58300
Cc02_g22330	GSCOC_T00014902001	-2.58070123159647	Basic blue protein
Cc08_g01560	GSCOC_T00038368001	-2.57778330718905	Protein of unknown function (DUF581)
Cc06_g01630	GSCOC_T00023391001	-2.57346455040858	unknown protein; FUNCTIONS IN
Cc07_g04040	GSCOC_T00039654001	-2.57219235602909	Putative uncharacterized protein
Cc01_g11940	GSCOC_T00028110001	-2.57105747806927	BTB/POZ domain-containing protein At5g60050
Cc00_g00610	GSCOC_T00036155001	-2.56758127736653	Putative Protein kinase superfamily protein
Cc08_g05740	GSCOC_T00024363001	-2.56649908049749	Chitinase-like protein 2
Cc04_g09720	GSCOC_T00000093001	-2.5650485702865	Thylakoid lumenal 17.9 kDa protein, chloroplastic
Cc04_g04850	GSCOC_T00022224001	-2.56280812793678	Probable receptor-like protein kinase At1g80640
Cc04_g02090	GSCOC_T00021876001	-2.56245082918831	Putative Inactive protein kinase SELMODRAFT_444075
Cc07_g01720	GSCOC_T00039348001	-2.55954271108673	Hypothetical protein
Cc04_g02110	GSCOC_T00021879001	-2.55913869714592	Serine acetyltransferase 5
Cc03_g12790	GSCOC_T00015155001	-2.55896380661081	Putative disease resistance protein RGA4
Cc05_g04910	GSCOC_T00035035001	-2.55490549365012	Putative unknown protein; Has 35333 Blast hits to 34131 proteins in 2444 species
Cc01_g09780	GSCOC_T00024045001	-2.54372773151513	Arogenate dehydratase/prephenate dehydratase 6, chloroplastic
Cc03_g02000	GSCOC_T00025835001	-2.54356509316119	Probable protein phosphatase 2C 40
Cc06_g00740	GSCOC_T00023273001	-2.5429870345509	Putative Macrophage migration inhibitory factor homolog
Cc00_g01150	GSCOC_T00019008001	-2.5400523183396	Putative unknown protein; FUNCTIONS IN
Cc09_g03360	GSCOC_T00017558001	-2.53997097122708	Dynamin-related protein 4C
Cc03_g07690	GSCOC_T00026629001	-2.53953381244878	Uncharacterized protein
Cc07_g14700	GSCOC_T00036578001	-2.53108936377085	Serine/threonine-protein kinase SAPK2
Cc00_g26190	GSCOC_T00008978001	-2.53095063433232	Putative Probable LRR receptor-like serine/threonine-protein kinase At3g47570
Cc08_g12950	GSCOC_T00030407001	-2.52989636612624	Protein YABBY 4
Cc11_g00610	GSCOC_T00004222001	-2.52699770180704	Glyceraldehyde-3-phosphate dehydrogenase A, chloroplastic
Cc00_g12190	GSCOC_T00012517001	-2.52686703892526	Elicitor-responsive protein 3
Cc06_g13170	GSCOC_T00041436001	-2.52656232124062	Putative Protein VERNALIZATION INSENSITIVE 3
Cc02_g07500	GSCOC_T00029931001	-2.52572662596274	Ribulose bisphosphate carboxylase/oxygenase activase 1, chloroplastic
Cc02_g13570	GSCOC_T00029131001	-2.52494732480799	30S ribosomal protein S5, chloroplastic
Cc05_g07120	GSCOC_T00042235001	-2.52261897480756	Hypothetical protein
Cc08_g09450	GSCOC_T00026884001	-2.52223526529787	Putative UPF0481 protein At3g02645
Cc11_g05000	GSCOC_T00020436001	-2.52076115478981	Receptor-like protein kinase FERONIA
Cc08_g15610	GSCOC_T00035500001	-2.51645012982918	ABC transporter C family member 10
Cc00_g29280	GSCOC_T00011749001	-2.51615037386416	Codeine O-demethylase
Cc00_g26060	GSCOC_T00003724001	-2.51501472105939	Heavy metal transport/detoxification superfamily protein
Cc07_g04970	GSCOC_T00039758001	-2.51299923147124	Putative NAD(P)-binding Rossmann-fold superfamily protein
Cc08_g02440	GSCOC_T00037718001	-2.51159952674364	NAC domain containing protein 71
Cc09_g01270	GSCOC_T00017834001	-2.51133718753257	Protein STRUBBELIG-RECEPTOR FAMILY 8
Cc01_g11220	GSCOC_T00024241001	-2.51111050900136	Putative BEST Arabidopsis thaliana protein match is
Cc09_g01770	GSCOC_T00017766001	-2.51094835807135	Putative Protein TRANSPARENT TESTA 12
Cc05_g11190	GSCOC_T00021347001	-2.50948592904678	Putative Plant Tudor-like protein
Cc06_g10560	GSCOC_T00041762001	-2.5057305632702	IQ-domain 26
Cc02_g17060	GSCOC_T00014210001	-2.50415208259498	Kinesin motor family protein
Cc05_g00840	GSCOC_T00013178001	-2.50099508821205	Oxygen-evolving enhancer protein 2, chloroplastic
Cc07_g01970	GSCOC_T00039376001	-2.50053964705282	Phosphoenolpyruvate/phosphate translocator 2, chloroplastic
Cc04_g07650	GSCOC_T00022597001	-2.49799882900162	Cyclophilin-like peptidyl-prolyl cis-trans isomerase family protein
Cc01_g14040	GSCOC_T00028391001	-2.49618070020712	Tetratricopeptide repeat (TPR)-like superfamily protein
Cc07_g03150	GSCOC_T00039533001	-2.49264630347322	Putative Protein IQ-DOMAIN 31
Cc05_g05830	GSCOC_T00035168001	-2.49015204377793	Putative UDP-glucose flavonoid 3-O-glucosyltransferase 3
Cc02_g11760	GSCOC_T00029374001	-2.48878053886534	Thioredoxin-like protein CXXS1
Cc07_g14530	GSCOC_T00036605001	-2.48867072589061	Putative uncharacterized protein
Cc10_g06960	GSCOC_T00034591001	-2.48673443979626	UDP-glycosyltransferase 85A1
Cc03_g01950	GSCOC_T00025828001	-2.48656478645753	ralf-like 33
Cc08_g13220	GSCOC_T00030368001	-2.48301299927001	Putative Protein STRUBBELIG-RECEPTOR FAMILY 8
Cc06_g15570	GSCOC_T00030803001	-2.48164323527007	Putative zinc finger protein 8
Cc03_g09300	GSCOC_T00042688001	-2.47974386239855	Putative UDP-glycosyltransferase 75D1
Cc07_g10290	GSCOC_T00037136001	-2.47936325656736	Aldehyde dehydrogenase family 3 member F1
Cc03_g08180	GSCOC_T00033213001	-2.47853694224274	Putative UPF0481 protein At3g47200
Cc00_g08670	GSCOC_T00006865001	-2.47335970154792	unknown protein; FUNCTIONS IN
Cc03_g09250	GSCOC_T00042693001	-2.47165066085158	Probable metal-nicotianamine transporter YSL6
Cc01_g08770	GSCOC_T00023912001	-2.46903319152807	Putative unknown protein; LOCATED IN
Cc04_g13430	GSCOC_T00018290001	-2.468305533972	Putative Calmodulin binding protein-like
Cc06_g07250	GSCOC_T00031287001	-2.46811917321338	RNA binding (RRM/RBD/RNP motifs) family protein
Cc01_g09970	GSCOC_T00024074001	-2.46788649078351	Putative Bifunctional polymyxin resistance protein ArnA
Cc09_g03070	GSCOC_T00017592001	-2.46748335133656	Protein of Unknown Function (DUF239)
Cc01_g14410	GSCOC_T00028439001	-2.46727834061393	Plant protein of unknown function (DUF828)
Cc03_g05030	GSCOC_T00026240001	-2.46646299843833	Putative Cellulose synthase-like protein G1
Cc07_g14030	GSCOC_T00036664001	-2.46470862165405	Nucleobase-ascorbate transporter 11
Cc06_g20230	GSCOC_T00022936001	-2.46305448770285	Probable nitrite transporter At1g68570
Cc11_g15150	GSCOC_T00001010001	-2.45868207132968	unknown protein; INVOLVED IN
Cc02_g02190	GSCOC_T00020066001	-2.45774159096469	Putative Anthocyanidin 5,3-O-glucosyltransferase
Cc11_g10430	GSCOC_T00032580001	-2.45475883456493	Putative peptide/nitrate transporter At2g38100
Cc11_g01040	GSCOC_T00019652001	-2.45448445576509	Hypothetical protein
Cc00_g26750	GSCOC_T00003171001	-2.45353369405928	Anthocyanidin 5,3-O-glucosyltransferase
Cc07_g05630	GSCOC_T00039841001	-2.4521292254005	7-ethoxycoumarin O-deethylase
Cc07_g13920	GSCOC_T00036677001	-2.45208450390529	Putative UDP-rhamnose
Cc00_g13120	GSCOC_T00010670001	-2.45181751158985	Probable sarcosine oxidase
Cc04_g05240	GSCOC_T00022271001	-2.45095160289817	Hypothetical protein
Cc00_g17060	GSCOC_T00008777001	-2.44904710893858	Probable xyloglucan endotransglucosylase/hydrolase protein 28
Cc09_g03930	GSCOC_T00017485001	-2.44812495304527	Calreticulin-3
Cc07_g14810	GSCOC_T00036566001	-2.4466185722413	Hypothetical protein
Cc05_g05150	GSCOC_T00035070001	-2.44661840620501	Cyclin-U1-1
Cc09_g06160	GSCOC_T00033352001	-2.44506535112365	Formate dehydrogenase, mitochondrial
Cc05_g07500	GSCOC_T00042280001	-2.44426440256444	Putative uncharacterized protein
Cc06_g21340	GSCOC_T00018132001	-2.44397663169142	Putative hydroxyproline-rich glycoprotein family protein
Cc00_g00210	GSCOC_T00036098001	-2.44020643054733	Auxin response factor 19
Cc02_g21420	GSCOC_T00014783001	-2.4400903468667	Putative uncharacterized protein
Cc10_g00160	GSCOC_T00024454001	-2.43657105999291	Putative Probable inactive serine/threonine-protein kinase bub1
Cc01_g07860	GSCOC_T00015461001	-2.43526638122704	Putative axial regulator YABBY 2
Cc07_g10450	GSCOC_T00037115001	-2.43459707289339	Probable fructose-bisphosphate aldolase 2, chloroplastic
Cc00_g03090	GSCOC_T00003064001	-2.43452581186679	Putative uncharacterized protein
Cc02_g13780	GSCOC_T00029098001	-2.42784645978721	Predicted protein
Cc10_g11860	GSCOC_T00031863001	-2.42542092577312	Putative unknown protein; CONTAINS InterPro DOMAIN/s
Cc06_g17380	GSCOC_T00036382001	-2.42357277188148	Probable inactive leucine-rich repeat receptor-like protein kinase At3g03770
Cc09_g02070	GSCOC_T00017724001	-2.42189837200012	Putative Tyrosine-specific transport protein
Cc10_g09340	GSCOC_T00031558001	-2.42138203693155	12-oxophytodienoate reductase 2
Cc08_g09780	GSCOC_T00026929001	-2.4212595595038	Protein of unknown function (DUF1677)
Cc05_g12370	GSCOC_T00021199001	-2.42024864559164	Protochlorophyllide reductase, chloroplastic
Cc07_g01730	GSCOC_T00039349001	-2.41930282472651	Hypothetical protein
Cc02_g36400	GSCOC_T00003928001	-2.41837191768236	Cytochrome P450 76C4
Cc02_g36770	GSCOC_T00003881001	-2.41489937558612	Ferric reduction oxidase 7, chloroplastic
Cc03_g14340	GSCOC_T00031833001	-2.41220413457637	Hypothetical protein
Cc10_g10360	GSCOC_T00031423001	-2.41219605478309	Putative Wall-associated receptor kinase 2
Cc01_g19690	GSCOC_T00016026001	-2.41203439853958	Putative uncharacterized protein
Cc02_g32670	GSCOC_T00001209001	-2.41156108811509	UPF0603 protein At1g54780, chloroplastic
Cc06_g17830	GSCOC_T00040374001	-2.41047237161832	Zeatin O-glucosyltransferase
Cc04_g14540	GSCOC_T00040698001	-2.40913712622894	L-type lectin-domain containing receptor kinase IV.1
Cc00_g13830	GSCOC_T00007200001	-2.40765283889163	Axial regulator YABBY 1
Cc06_g04020	GSCOC_T00023706001	-2.40750948208036	Adenosine kinase 2
Cc10_g06450	GSCOC_T00034654001	-2.40721843187527	Putative Hypoxanthine-guanine phosphoribosyltransferase
Cc08_g12650	GSCOC_T00030448001	-2.40513716939659	Putative unknown protein; BEST Arabidopsis thaliana protein match is
Cc03_g10270	GSCOC_T00031037001	-2.40405333164247	Putative cytochrome BC1 synthesis
Cc02_g04030	GSCOC_T00020306001	-2.4038093270601	EXORDIUM like 3
Cc01_g12480	GSCOC_T00028184001	-2.40291322865452	Molybdopterin biosynthesis protein CNX3
Cc10_g16420	GSCOC_T00013398001	-2.40223993974754	Putative uncharacterized protein
Cc06_g01860	GSCOC_T00023422001	-2.39861597339539	Fructose-1,6-bisphosphatase, chloroplastic
Cc02_g05820	GSCOC_T00039102001	-2.39544966189181	Heavy metal transport/detoxification superfamily protein
Cc10_g05870	GSCOC_T00034748001	-2.39436642079954	Low affinity sulfate transporter 3
Cc04_g03050	GSCOC_T00021993001	-2.39431700053608	Photosystem I reaction center subunit VI, chloroplastic
Cc10_g13040	GSCOC_T00035350001	-2.39101271799638	Putative Cyanidin-3-O-glucoside 2-O-glucuronosyltransferase
Cc02_g36780	GSCOC_T00003879001	-2.38875336927268	Endoglucanase 25
Cc02_g03340	GSCOC_T00020215001	-2.38853558641366	Putative uncharacterized protein
Cc10_g00110	GSCOC_T00024447001	-2.38012865293453	Cysteine/Histidine-rich C1 domain family protein
Cc00_g32010	GSCOC_T00012890001	-2.37566727222128	Thioredoxin H2
Cc11_g05410	GSCOC_T00020497001	-2.37461209501991	Putative phagocytic receptor 1b
Cc09_g03180	GSCOC_T00017581001	-2.37301609297142	Putative uncharacterized protein
Cc07_g07110	GSCOC_T00040048001	-2.37143771767139	Putative unknown protein; FUNCTIONS IN
Cc08_g10880	GSCOC_T00027069001	-2.36594975114935	Cytokinin riboside 5'-monophosphate phosphoribohydrolase LOG8
Cc07_g07230	GSCOC_T00040063001	-2.36265439592087	Glycosyltransferase 6
Cc11_g01050	GSCOC_T00019651001	-2.35993956522799	Hypothetical protein
Cc00_g13430	GSCOC_T00003238001	-2.35399540350732	Receptor-like protein kinase FERONIA
Cc02_g15470	GSCOC_T00013995001	-2.35361436668597	Putative Receptor-like protein 12
Cc08_g17000	GSCOC_T00035679001	-2.35292837908049	Hypothetical protein
Cc03_g11110	GSCOC_T00042068001	-2.3514845370014	Hypothetical protein
Cc03_g05520	GSCOC_T00026309001	-2.34821489293282	Myb-related protein Myb4
Cc02_g30790	GSCOC_T00023825001	-2.34788159647625	Putative LRR receptor-like serine/threonine-protein kinase FLS2
Cc02_g13910	GSCOC_T00029080001	-2.34618216286259	NAC domain containing protein 10
Cc05_g12060	GSCOC_T00021236001	-2.34583855731262	Metallothionein-like protein type 3
Cc06_g16310	GSCOC_T00030711001	-2.34530175743618	Putative Uncharacterized protein C4orf29 homolog
Cc11_g01180	GSCOC_T00019614001	-2.34241860462188	Putative UDP-rhamnose
Cc02_g32500	GSCOC_T00001237001	-2.34001047612109	Putative Sugar transporter ERD6-like 5
Cc07_g07030	GSCOC_T00040036001	-2.33863881282793	Calcium-transporting ATPase 2, plasma membrane-type
Cc01_g20900	GSCOC_T00005046001	-2.33688829163544	Putative S-adenosyl-L-methionine-dependent methyltransferases superfamily protein
Cc11_g15110	GSCOC_T00001014001	-2.33565606963417	Predicted protein
Cc05_g08950	GSCOC_T00016936001	-2.33497807330394	Putative G-type lectin S-receptor-like serine/threonine-protein kinase SD2-5
Cc03_g15190	GSCOC_T00026785001	-2.33317521821956	Putative UDP-glycosyltransferase 74E1
Cc03_g12940	GSCOC_T00030634001	-2.33235235342506	Hypothetical protein
Cc04_g14150	GSCOC_T00035944001	-2.33202424882732	Putative Dof zinc finger protein DOF5.6
Cc02_g15880	GSCOC_T00014054001	-2.33181417219528	Hypothetical protein
Cc06_g23860	GSCOC_T00040504001	-2.32832775265312	Protein kinase superfamily protein
Cc02_g00580	GSCOC_T00019842001	-2.3258337390242	UP-9A
Cc10_g05470	GSCOC_T00034802001	-2.32373894299275	Protein of unknown function (DUF620)
Cc11_g14710	GSCOC_T00032021001	-2.32347764306334	Hypothetical protein
Cc02_g35270	GSCOC_T00042873001	-2.32243568800518	Protein of unknown function, DUF538
Cc00_g14590	GSCOC_T00012537001	-2.32137772644877	Rhodanese-like domain-containing protein 9, chloroplastic
Cc08_g16430	GSCOC_T00035604001	-2.32071015029906	Hypothetical protein
Cc11_g08270	GSCOC_T00032900001	-2.32060924081005	inorganic carbon transport protein-related
Cc02_g08120	GSCOC_T00029843001	-2.32045342578699	ACT domain-containing protein
Cc01_g03960	GSCOC_T00040880001	-2.32017909732445	Putative G-type lectin S-receptor-like serine/threonine-protein kinase RLK1
Cc07_g06780	GSCOC_T00040002001	-2.3189070710625	Hypothetical protein
Cc10_g03230	GSCOC_T00024846001	-2.31882584081904	PPPDE putative thiol peptidase family protein
Cc11_g06540	GSCOC_T00020671001	-2.31478075881478	Putative Receptor-like protein 12
Cc00_g18540	GSCOC_T00008824001	-2.31408397072771	Cytochrome P450 71A4
Cc02_g16300	GSCOC_T00014112001	-2.31249973230706	Subtilisin-like protease
Cc02_g14560	GSCOC_T00013869001	-2.31088621565148	Putative GDSL esterase/lipase At1g28590
Cc01_g18770	GSCOC_T00016157001	-2.31027272561758	Magnesium transporter MRS2-I
Cc00_g05810	GSCOC_T00012073001	-2.30922873201603	Hypothetical protein
Cc06_g15950	GSCOC_T00030754001	-2.30470113103714	Probable plastid-lipid-associated protein 13, chloroplastic
Cc05_g14870	GSCOC_T00038767001	-2.30465647165746	unknown protein; FUNCTIONS IN
Cc02_g16090	GSCOC_T00014084001	-2.30432124251571	Monothiol glutaredoxin-S2
Cc08_g05240	GSCOC_T00042427001	-2.30388526829905	Protein PAM68, chloroplastic
Cc00_g33740	GSCOC_T00012504001	-2.30383863925374	Putative Probable LRR receptor-like serine/threonine-protein kinase At4g08850
Cc02_g18340	GSCOC_T00014374001	-2.30190603895178	Putative Polyneuridine-aldehyde esterase
Cc06_g07980	GSCOC_T00031190001	-2.30175084451714	Actin-depolymerizing factor 6
Cc05_g12890	GSCOC_T00021130001	-2.298838683383	G-type lectin S-receptor-like serine/threonine-protein kinase At4g27290
Cc07_g00250	GSCOC_T00019091001	-2.29790762797526	Putative Estradiol 17-beta-dehydrogenase 12
Cc07_g07940	GSCOC_T00040156001	-2.29681216320643	Serine hydroxymethyltransferase 1, mitochondrial
Cc01_g13550	GSCOC_T00028324001	-2.2954804701833	Copper transporter 1
Cc11_g09680	GSCOC_T00032688001	-2.2930883405405	Hypothetical protein
Cc06_g04230	GSCOC_T00023732001	-2.29247503233029	Putative Heavy metal transport/detoxification superfamily protein
Cc00_g23900	GSCOC_T00012446001	-2.29163157972118	Serine carboxypeptidase-like 18
Cc08_g03150	GSCOC_T00037829001	-2.29048576392133	Alpha,alpha-trehalose-phosphate synthase [UDP-forming] 5
Cc02_g14570	GSCOC_T00013870001	-2.29029255954691	GDSL esterase/lipase At1g28580
Cc01_g07830	GSCOC_T00015458001	-2.28827037252416	Putative Protein FAF-like, chloroplastic
Cc02_g20400	GSCOC_T00014653001	-2.28812024713547	Malate dehydrogenase, glyoxysomal
Cc06_g21490	GSCOC_T00008017001	-2.28581588617086	Putative Cation/calcium exchanger 1
Cc03_g11020	GSCOC_T00042054001	-2.2830155207572	Kirola
Cc00_g14150	GSCOC_T00009209001	-2.279922342631	Protein COBRA
Cc01_g21940	GSCOC_T00004918001	-2.27938456607069	Putative uncharacterized protein
Cc05_g12390	GSCOC_T00021196001	-2.27551174740535	Protein of unknown function (DUF1218)
Cc08_g02680	GSCOC_T00037749001	-2.27543030534597	Carboxylesterase 1
Cc00_g19740	GSCOC_T00011283001	-2.27368256041	Hypothetical protein
Cc11_g14950	GSCOC_T00001038001	-2.27105972764609	Peptidyl-prolyl cis-trans isomerase
Cc05_g08160	GSCOC_T00016828001	-2.26751488352187	Predicted protein
Cc03_g15530	GSCOC_T00026838001	-2.26452436759569	Putative Predicted protein
Cc07_g01130	GSCOC_T00019201001	-2.26395321564864	Acyltransferase-like protein At3g26840, chloroplastic
Cc00_g03730	GSCOC_T00013259001	-2.26329500477064	Protein SRG1
Cc00_g16250	GSCOC_T00009567001	-2.2629112798603	Hypothetical protein
Cc01_g14570	GSCOC_T00028463001	-2.25904887150618	Probable phytol kinase 2, chloroplastic
Cc05_g06070	GSCOC_T00035214001	-2.25776152429733	Protein THYLAKOID FORMATION1, chloroplastic
Cc07_g14060	GSCOC_T00036660001	-2.25352282319692	nicotinamidase 1
Cc11_g14320	GSCOC_T00032072001	-2.25349745945046	Nucleobase-ascorbate transporter 7
Cc01_g21350	GSCOC_T00004990001	-2.24127548363903	Putative RING/FYVE/PHD zinc finger superfamily protein
Cc00_g05240	GSCOC_T00010363001	-2.23788945447409	Putative Probable LRR receptor-like serine/threonine-protein kinase At4g08850
Cc09_g07220	GSCOC_T00036294001	-2.23721849763654	Bifunctional dihydrofolate reductase-thymidylate synthase
Cc08_g03110	GSCOC_T00037821001	-2.23632973326255	Putative uncharacterized protein
Cc11_g10600	GSCOC_T00032557001	-2.23564545316488	Serine/threonine-protein kinase STN7, chloroplastic
Cc02_g28910	GSCOC_T00018191001	-2.23243855349736	Serine carboxypeptidase-like 40
Cc01_g19350	GSCOC_T00016069001	-2.23045787666543	Plant protein of unknown function (DUF868)
Cc04_g04950	GSCOC_T00022234001	-2.22991258716041	Putative Zinc finger protein 3
Cc05_g06750	GSCOC_T00042185001	-2.22731978071423	Thylakoid lumenal protein At1g03610, chloroplastic
Cc03_g03670	GSCOC_T00026062001	-2.22718791585084	Primary amine oxidase
Cc01_g13360	GSCOC_T00028301001	-2.22701122391556	plastid transcriptionally active 16
Cc08_g01650	GSCOC_T00038353001	-2.22582610889378	Putative Disease resistance protein RPM1
Cc10_g02730	GSCOC_T00024780001	-2.22464020046782	RAD-like 1
Cc06_g00570	GSCOC_T00023239001	-2.22419978487668	Cationic peroxidase 1
Cc03_g10910	GSCOC_T00042031001	-2.22384082046204	Cytochrome P450 71A2
Cc00_g35820	GSCOC_T00013517001	-2.22247943873	CMV 1a interacting protein 1
Cc02_g39880	GSCOC_T00027649001	-2.21953536791034	CBL-interacting serine/threonine-protein kinase 9
Cc01_g08200	GSCOC_T00015513001	-2.21836218588881	Putative Probable leucine-rich repeat receptor-like protein kinase At5g49770
Cc00_g00160	GSCOC_T00036092001	-2.21830992284693	Putative Protein of unknown function (DUF581)
Cc02_g11930	GSCOC_T00029355001	-2.2155160316516	Putative uncharacterized protein
Cc07_g10920	GSCOC_T00037058001	-2.21502744995802	Putative Rhodanese-like domain-containing protein 17
Cc04_g08070	GSCOC_T00022655001	-2.21489783987269	Tropinone reductase homolog At1g07440
Cc05_g09820	GSCOC_T00021535001	-2.21488531293845	Glucose-1-phosphate adenylyltransferase small subunit, chloroplastic
Cc06_g08940	GSCOC_T00041984001	-2.21079155156938	Putative Plant Tudor-like RNA-binding protein
Cc01_g11670	GSCOC_T00028073001	-2.20935584278271	Putative Dof zinc finger protein DOF2.1
Cc07_g12330	GSCOC_T00036888001	-2.20884978376768	unknown protein; FUNCTIONS IN
Cc05_g00350	GSCOC_T00017064001	-2.20808824298224	Putative Acidic endochitinase
Cc06_g12610	GSCOC_T00041515001	-2.20767622975872	Peroxiredoxin Q, chloroplastic
Cc03_g10830	GSCOC_T00042014001	-2.20401070676861	Putative P-loop containing nucleoside triphosphate hydrolases superfamily protein
Cc02_g05260	GSCOC_T00039029001	-2.20383868334087	Rhodanese-like domain-containing protein 7
Cc11_g11440	GSCOC_T00032445001	-2.20368655589634	UDP-glycosyltransferase 89A2
Cc06_g15590	GSCOC_T00030801001	-2.20347779686697	Putative Disease resistance response protein 206
Cc11_g13710	GSCOC_T00032148001	-2.20174622529605	Glutathione S-transferase U17
Cc10_g01850	GSCOC_T00024674001	-2.19936308557949	ATP sulfurylase 2
Cc10_g01120	GSCOC_T00024578001	-2.19708826203598	Thioredoxin-like protein CDSP32, chloroplastic
Cc06_g00880	GSCOC_T00023291001	-2.19595705139173	Putative Mitoferrin
Cc07_g01740	GSCOC_T00039350001	-2.19534813926227	Hypothetical protein
Cc02_g14400	GSCOC_T00013848001	-2.19409235150357	IQ-domain 9
Cc07_g07600	GSCOC_T00040110001	-2.19049703477595	Hypothetical protein
Cc07_g13720	GSCOC_T00036703001	-2.18622005057371	Geraniol dehydrogenase 1
Cc08_g03960	GSCOC_T00034196001	-2.18290743484863	Phosphoribulokinase, chloroplastic
Cc03_g15260	GSCOC_T00026796001	-2.17853517788165	Putative Reticuline oxidase-like protein
Cc01_g18730	GSCOC_T00016162001	-2.17605450198235	Probable WRKY transcription factor 21
Cc03_g05800	GSCOC_T00026349001	-2.17415580982791	Long-chain-alcohol oxidase FAO1
Cc01_g14680	GSCOC_T00028476001	-2.16864161168602	Protein of unknown function (DUF640)
Cc06_g01320	GSCOC_T00023347001	-2.16452046143438	Phosphoinositide phospholipase C 2
Cc08_g08910	GSCOC_T00017228001	-2.1642796129902	Putative BURP domain-containing protein 5
Cc06_g09470	GSCOC_T00041911001	-2.16263896235004	Putative Serine incorporator 3
Cc04_g08250	GSCOC_T00022680001	-2.16243068264086	Putative Dof zinc finger protein DOF5.4
Cc02_g34790	GSCOC_T00011786001	-2.1623186015252	Putative unknown protein; BEST Arabidopsis thaliana protein match is
Cc07_g10550	GSCOC_T00037101001	-2.1621261520801	Putative Protein BASIC PENTACYSTEINE6
Cc05_g08090	GSCOC_T00016820001	-2.15992218016739	Putative Uncharacterized protein HI_0077
Cc01_g16330	GSCOC_T00016455001	-2.15750388910018	Putative Auxin-induced in root cultures protein 12
Cc02_g01190	GSCOC_T00019930001	-2.15408405170278	Protein yippee-like At4g27745
Cc11_g08610	GSCOC_T00032849001	-2.15399394636835	Serine carboxypeptidase-like 50
Cc02_g03410	GSCOC_T00020225001	-2.15219182505567	TraB family protein
Cc07_g10820	GSCOC_T00037068001	-2.15035063185449	Ferredoxin--NADP reductase, leaf-type isozyme, chloroplastic
Cc03_g10380	GSCOC_T00031054001	-2.15001588998116	cytochrome BC1 synthesis
Cc05_g08150	GSCOC_T00016827001	-2.14607363751049	Putative uncharacterized protein OSJNBa0095J15.6
Cc01_g17500	GSCOC_T00016317001	-2.14478397285745	Photosystem I reaction center subunit IV A, chloroplastic
Cc00_g00880	GSCOC_T00041138001	-2.14399680488357	Putative P-loop containing nucleoside triphosphate hydrolases superfamily protein
Cc07_g07640	GSCOC_T00040115001	-2.13758638990781	LRR receptor-like serine/threonine-protein kinase HSL2
Cc02_g22710	GSCOC_T00014948001	-2.13357960107149	Potassium channel AKT2/3
Cc01_g04150	GSCOC_T00039285001	-2.13312421053387	Calcium-dependent lipid-binding (CaLB domain) plant phosphoribosyltransferase family protein
Cc11_g14690	GSCOC_T00032023001	-2.13308570019318	Polygalacturonase-1 non-catalytic subunit beta
Cc10_g14260	GSCOC_T00012016001	-2.13188387177239	Pathogen-related protein
Cc00_g13410	GSCOC_T00003236001	-2.13147947072434	Receptor-like protein kinase FERONIA
Cc08_g12850	GSCOC_T00030422001	-2.12931432551893	Putative uncharacterized protein
Cc06_g19780	GSCOC_T00013710001	-2.1291232202375	Putative Receptor-like protein kinase FERONIA
Cc06_g15700	GSCOC_T00030787001	-2.12806630939261	DNA-3-methyladenine glycosylase
Cc07_g12630	GSCOC_T00036849001	-2.12505012663615	Putative P-loop containing nucleoside triphosphate hydrolases superfamily protein
Cc06_g11320	GSCOC_T00041672001	-2.12399432834144	Alkaline-phosphatase-like family protein
Cc00_g11300	GSCOC_T00007149001	-2.12335066732233	Putative Bark storage protein A
Cc07_g06560	GSCOC_T00039971001	-2.12276627238038	Putative TRICHOME BIREFRINGENCE-LIKE 21
Cc09_g03800	GSCOC_T00017501001	-2.12049305505585	Thioredoxin F, chloroplastic
Cc02_g18970	GSCOC_T00014459001	-2.12013041623181	Caffeoyl-CoA O-methyltransferase 1
Cc06_g03030	GSCOC_T00023573001	-2.11943671803161	Putative Auxin-induced protein 5NG4
Cc11_g05150	GSCOC_T00020456001	-2.11414410772059	G-type lectin S-receptor-like serine/threonine-protein kinase At4g27290
Cc00_g11790	GSCOC_T00007740001	-2.1139802882884	Putative Predicted protein
Cc04_g07480	GSCOC_T00022567001	-2.1128325993077	Putative receptor protein kinase ZmPK1
Cc10_g07920	GSCOC_T00034463001	-2.11166743492015	Ergosterol biosynthetic protein 28
Cc07_g05350	GSCOC_T00039805001	-2.11129497849754	Oxygen-evolving enhancer protein 1, chloroplastic
Cc06_g03900	GSCOC_T00023688001	-2.10976206940607	Aquaporin PIP2-2
Cc02_g08740	GSCOC_T00029755001	-2.1051545037375	unknown protein; FUNCTIONS IN
Cc09_g01650	GSCOC_T00017780001	-2.10424847892593	ATP synthase gamma chain, chloroplastic
Cc02_g06960	GSCOC_T00039252001	-2.1019325443972	Sedoheptulose-1,7-bisphosphatase, chloroplastic
Cc00_g01420	GSCOC_T00010644001	-2.09889342130057	L-type lectin-domain containing receptor kinase IV.1
Cc00_g32770	GSCOC_T00009826001	-2.09846368474984	Heterodimeric geranylgeranyl pyrophosphate synthase small subunit, chloroplastic
Cc04_g07800	GSCOC_T00022617001	-2.09804036918345	Calcium sensing receptor, chloroplastic
Cc07_g04390	GSCOC_T00039695001	-2.09799929847106	Putative Receptor-like protein kinase FERONIA
Cc02_g37510	GSCOC_T00027980001	-2.09714403579369	( )-neomenthol dehydrogenase
Cc01_g12820	GSCOC_T00028232001	-2.0955087057048	Fasciclin-like arabinogalactan protein 4
Cc09_g00300	GSCOC_T00017965001	-2.09361901361015	Putative Probable ADP-ribosylation factor GTPase-activating protein AGD11
Cc02_g31060	GSCOC_T00011097001	-2.09338177053332	Photosystem II reaction center PsbP family protein
Cc07_g06710	GSCOC_T00039992001	-2.08843164476683	Putative Sigma factor sigB regulation protein rsbQ
Cc06_g10220	GSCOC_T00041815001	-2.08616652183765	Putative Probable glycosyltransferase At3g07620
Cc09_g07970	GSCOC_T00003785001	-2.08575575823402	Putative Lysosomal alpha-mannosidase
Cc08_g00650	GSCOC_T00038486001	-2.08541493989715	Putative uncharacterized protein
Cc01_g20300	GSCOC_T00015950001	-2.08513392752129	Protein TRANSPORT INHIBITOR RESPONSE 1
Cc07_g13990	GSCOC_T00036669001	-2.083620767417	Receptor-like cytosolic serine/threonine-protein kinase RBK1
Cc11_g13530	GSCOC_T00032170001	-2.08103976851579	Nitrate transporter 1.2
Cc09_g01760	GSCOC_T00017767001	-2.07957301635973	Uncharacterized GPI-anchored protein At1g61900
Cc09_g10140	GSCOC_T00041084001	-2.07890859607685	Putative Protein kinase protein with adenine nucleotide alpha hydrolases-like domain
Cc02_g34520	GSCOC_T00000703001	-2.07211864333617	Probable protein phosphatase 2C 73
Cc01_g05880	GSCOC_T00027415001	-2.06957266362867	Putative Uncharacterized protein At2g37660, chloroplastic
Cc11_g07390	GSCOC_T00018058001	-2.06937783509997	Microtubule-associated protein 70-1
Cc02_g06640	GSCOC_T00039206001	-2.06833750647957	Protein yippee-like
Cc10_g10160	GSCOC_T00031448001	-2.06535091257802	Dammarenediol II synthase
Cc04_g01110	GSCOC_T00021745001	-2.06109905489021	Lung seven transmembrane receptor family protein
Cc02_g09360	GSCOC_T00029663001	-2.06083163758008	Putative bZIP protein
Cc02_g38130	GSCOC_T00027903001	-2.06042848523097	Glycerol-3-phosphate acyltransferase 4
Cc07_g19780	GSCOC_T00033871001	-2.06018819569882	Predicted protein
Cc00_g11250	GSCOC_T00011610001	-2.05675855118334	ABC transporter C family member 2
Cc07_g04900	GSCOC_T00039751001	-2.05384887953676	Predicted protein
Cc11_g03500	GSCOC_T00040795001	-2.05320139654239	Putative UDP-glycosyltransferase 85A2
Cc04_g06510	GSCOC_T00022440001	-2.05299317333602	Hypothetical protein
Cc04_g05900	GSCOC_T00022362001	-2.05037517575677	Putative Lysosomal alpha-mannosidase
Cc00_g24320	GSCOC_T00006032001	-2.04706659430309	Putative UDP-rhamnose
Cc07_g06010	GSCOC_T00039893001	-2.04641551172314	Zeaxanthin epoxidase, chloroplastic
Cc02_g33050	GSCOC_T00016746001	-2.04476274920836	Putative GDSL esterase/lipase 5
Cc07_g07650	GSCOC_T00040119001	-2.04445867974411	Leucine-rich repeat receptor-like serine/threonine-protein kinase BAM1
Cc01_g15140	GSCOC_T00016599001	-2.04395122912785	unknown protein; FUNCTIONS IN
Cc08_g09370	GSCOC_T00017291001	-2.04359911082449	Probable peptide transporter At1g52190
Cc05_g11020	GSCOC_T00021368001	-2.03979937601192	Hypothetical protein
Cc00_g13970	GSCOC_T00010018001	-2.03749857287105	Putative Monoglyceride lipase
Cc00_g02660	GSCOC_T00006653001	-2.03600667273165	Tabersonine 16-hydroxylase (Fragment)
Cc07_g06340	GSCOC_T00039935001	-2.03480177825781	Putative Probable WRKY transcription factor 7
Cc08_g16170	GSCOC_T00035569001	-2.03426780623834	GDSL esterase/lipase At4g10955
Cc01_g21470	GSCOC_T00004976001	-2.03300050943808	Putative uncharacterized protein
Cc06_g09080	GSCOC_T00041968001	-2.02967549348982	SOUL heme-binding family protein
Cc03_g04120	GSCOC_T00026120001	-2.02617036668648	Putative Protein XRI1
Cc09_g00180	GSCOC_T00017981001	-2.0257120038319	defective in meristem silencing 3
Cc00_g16190	GSCOC_T00013150001	-2.02397811603134	Putative uncharacterized protein
Cc02_g28560	GSCOC_T00009442001	-2.02340166764594	Protein of unknown function (DUF3411)
Cc04_g06310	GSCOC_T00022417001	-2.02251933904585	Putative uncharacterized protein
Cc02_g24310	GSCOC_T00002340001	-2.02011565387647	Putative lipid-binding protein At4g00165
Cc02_g12050	GSCOC_T00029337001	-2.01776138917097	G-type lectin S-receptor-like serine/threonine-protein kinase At4g03230
Cc06_g04440	GSCOC_T00042953001	-2.01698426941309	Major facilitator superfamily protein
Cc11_g15750	GSCOC_T00038093001	-2.01334546533264	Putative Octicosapeptide/Phox/Bem1p family protein
Cc01_g00190	GSCOC_T00012415001	-2.01030546126789	protein containing PDZ domain, a K-box domain, and a TPR region
Cc02_g03300	GSCOC_T00020209001	-2.00894729549526	Putative IQ-domain 22
Cc10_g06080	GSCOC_T00034712001	-2.00666890934988	ATP synthase delta chain, chloroplastic
Cc02_g37820	GSCOC_T00027940001	-2.00574152548368	AT hook motif DNA-binding family protein
Cc02_g00690	GSCOC_T00019859001	-2.00565131051274	Uncharacterized calcium-binding protein At1g02270
Cc02_g20780	GSCOC_T00014697001	-2.00223374228827	Putative glutamine amidotransferase YLR126C
Cc00_g33900	GSCOC_T00010189001	-2.00123639281788	Putative FUNCTIONS IN
Cc05_g01020	GSCOC_T00000794001	-2.000619396678	Putative disease resistance protein RGA1
Cc00_g16440	GSCOC_T00005629001	-1.99950118327901	Hypothetical protein
Cc04_g02820	GSCOC_T00021963001	-1.9957908376143	Hypothetical protein
Cc02_g15560	GSCOC_T00014010001	-1.99519289328753	Ras-related protein RABA1c
Cc04_g14560	GSCOC_T00040705001	-1.99301313387187	L-type lectin-domain containing receptor kinase IV.2
Cc03_g01320	GSCOC_T00025741001	-1.99184456499897	Putative uncharacterized protein
Cc11_g16600	GSCOC_T00038200001	-1.98825463775136	Putative unknown protein; FUNCTIONS IN
Cc06_g00400	GSCOC_T00023216001	-1.98645482443447	Elongation factor P
Cc01_g17770	GSCOC_T00016283001	-1.98605718329678	Photosystem II reaction center PSB28 protein, chloroplastic
Cc07_g08190	GSCOC_T00040184001	-1.98437560376917	Uncharacterized protein At1g66480
Cc10_g06760	GSCOC_T00034615001	-1.98384800656442	Alcohol dehydrogenase-like 1
Cc03_g09080	GSCOC_T00042716001	-1.98197645880755	Peptidyl-prolyl cis-trans isomerase FKBP65
Cc08_g12710	GSCOC_T00030441001	-1.98066968600309	L-lactate dehydrogenase A
Cc02_g19420	GSCOC_T00014508001	-1.97956430036081	Putative uncharacterized protein
Cc09_g01700	GSCOC_T00017774001	-1.97821655005131	Peroxidase 42
Cc07_g07220	GSCOC_T00040061001	-1.97713854400235	Galactomannan galactosyltransferase 1
Cc07_g04160	GSCOC_T00039668001	-1.97497166063865	Alpha-amylase isozyme 2A
Cc03_g07590	GSCOC_T00026614001	-1.97442661726862	Putative unknown protein; FUNCTIONS IN
Cc00_g04380	GSCOC_T00010849001	-1.97367458254809	UDP-glycosyltransferase 86A1
Cc08_g09070	GSCOC_T00017247001	-1.97273356951992	Putative Alcohol dehydrogenase class-3
Cc01_g17350	GSCOC_T00016335001	-1.97238468333289	unknown protein; FUNCTIONS IN
Cc03_g02730	GSCOC_T00025940001	-1.96922017673489	Pyruvate, phosphate dikinase, chloroplastic
Cc00_g28280	GSCOC_T00000756001	-1.96877105818312	Protein SRG1
Cc04_g10770	GSCOC_T00042647001	-1.96720416376032	Putative Probable receptor-like protein kinase At1g67000
Cc02_g18920	GSCOC_T00014452001	-1.96656641494055	PI-PLC X domain-containing protein At5g67130
Cc06_g17810	GSCOC_T00040372001	-1.96554326449119	Zeatin O-glucosyltransferase
Cc07_g10580	GSCOC_T00037097001	-1.96474321298309	GDP-mannose 4,6 dehydratase 2
Cc02_g23910	GSCOC_T00015096001	-1.9645169161436	Putative Dihydroflavonol-4-reductase
Cc02_g18100	GSCOC_T00014345001	-1.96300682049104	Long chain acyl-CoA synthetase 2
Cc01_g19410	GSCOC_T00016061001	-1.95912343934421	Chalcone-flavanone isomerase family protein
Cc02_g04050	GSCOC_T00020308001	-1.95816697340785	DNA photolyases;DNA photolyases
Cc05_g07540	GSCOC_T00042286001	-1.95669134439015	Probable protein phosphatase 2C 58
Cc11_g17480	GSCOC_T00038320001	-1.95538852634827	Somatic embryogenesis receptor kinase 1
Cc02_g02870	GSCOC_T00020156001	-1.95375142444384	Tubulin beta-1 chain
Cc10_g13030	GSCOC_T00035352001	-1.95249236237793	Putative Cyanidin-3-O-glucoside 2-O-glucuronosyltransferase
Cc00_g28930	GSCOC_T00008415001	-1.95203646584032	Putative Protein of unknown function DUF247, plant
Cc08_g00530	GSCOC_T00038504001	-1.95136059814062	ATP synthase subunit b', chloroplastic
Cc07_g14820	GSCOC_T00036564001	-1.95081116146223	Phospho-2-dehydro-3-deoxyheptonate aldolase 1, chloroplastic
Cc06_g07440	GSCOC_T00031260001	-1.95041014557584	Putative RING/U-box superfamily protein
Cc00_g26800	GSCOC_T00009925001	-1.94787805412998	Putative Disease resistance protein RPM1
Cc00_g16610	GSCOC_T00013784001	-1.94759989729149	Arabinanase/levansucrase/invertase
Cc09_g08040	GSCOC_T00003802001	-1.94619068643255	Homeobox-leucine zipper protein HOX32
Cc07_g00870	GSCOC_T00019168001	-1.94591846568344	50S ribosomal protein L27, chloroplastic
Cc02_g35140	GSCOC_T00012344001	-1.94551655324837	Chloroplast stem-loop binding protein of 41 kDa b, chloroplastic
Cc02_g04100	GSCOC_T00020313001	-1.9448660740883	21 kDa protein
Cc07_g07950	GSCOC_T00040157001	-1.94151024976014	Serine hydroxymethyltransferase, mitochondrial
Cc00_g12870	GSCOC_T00002614001	-1.93849845614309	Double-stranded RNA-binding protein 2
Cc08_g08850	GSCOC_T00017218001	-1.93812490364006	Putative UPF0481 protein At3g47200
Cc02_g20290	GSCOC_T00014638001	-1.93709742211445	Pathogenesis-related protein 1B
Cc00_g36030	GSCOC_T00011613001	-1.93651511988581	Putative Disease resistance protein RPM1
Cc02_g22300	GSCOC_T00014899001	-1.93591888686598	Lung seven transmembrane receptor family protein
Cc04_g02830	GSCOC_T00021964001	-1.93561206941446	NDH-dependent cyclic electron flow 1
Cc03_g02940	GSCOC_T00025967001	-1.93430832454769	Glutamine synthetase leaf isozyme, chloroplastic
Cc08_g12470	GSCOC_T00030476001	-1.93071991342992	Putative Predicted protein
Cc09_g04450	GSCOC_T00017424001	-1.93069777462753	Coproporphyrinogen-III oxidase, chloroplastic
Cc07_g14870	GSCOC_T00036559001	-1.92908520242671	Putative Protein CbbY
Cc05_g09690	GSCOC_T00021550001	-1.9288573415059	Putative GDSL esterase/lipase At4g10955
Cc06_g09850	GSCOC_T00041859001	-1.92659460194162	Putative uncharacterized protein
Cc07_g01950	GSCOC_T00039374001	-1.92454479985937	Putative Anthranilate phosphoribosyltransferase
Cc02_g11580	GSCOC_T00029393001	-1.92335472075408	Uncharacterized protein
Cc05_g15060	GSCOC_T00038739001	-1.92057974190691	Cellulose synthase-like protein E1
Cc02_g32200	GSCOC_T00012954001	-1.919520030996	Hypothetical protein
Cc03_g05210	GSCOC_T00026269001	-1.91812396534414	1-aminocyclopropane-1-carboxylate oxidase homolog 3
Cc02_g39890	GSCOC_T00027645001	-1.91793992388741	3-ketoacyl-CoA synthase 1
Cc02_g00850	GSCOC_T00019885001	-1.91646856485342	Polyketide cyclase/dehydrase and lipid transport superfamily protein
Cc03_g16050	GSCOC_T00001672001	-1.91536827570958	Putative uncharacterized protein
Cc04_g02740	GSCOC_T00021952001	-1.91455816786574	Putative Uncharacterized isomerase BH0283
Cc07_g05530	GSCOC_T00039829001	-1.91316281573488	Putative Zinc-finger domain of monoamine-oxidase A repressor R1
Cc07_g02540	GSCOC_T00039452001	-1.9094509610929	Putative Heavy metal transport/detoxification superfamily protein
Cc01_g13710	GSCOC_T00028348001	-1.90838731842541	Putative Mitochondrial uncoupling protein 3
Cc00_g06650	GSCOC_T00007489001	-1.90727570117837	Putative Bifunctional dihydroflavonol 4-reductase/flavanone 4-reductase
Cc11_g01970	GSCOC_T00033046001	-1.90587453972928	Putative Probable disease resistance protein At1g58390
Cc02_g38940	GSCOC_T00027788001	-1.90511904890511	Ubiquitin-conjugating enzyme E2 28
Cc02_g34400	GSCOC_T00000681001	-1.90403094898052	Putative F-box/LRR-repeat protein 3
Cc11_g13630	GSCOC_T00032158001	-1.90370329886755	Thioredoxin H2
Cc11_g01580	GSCOC_T00019547001	-1.9036158993733	Putative uncharacterized protein
Cc07_g08490	GSCOC_T00040223001	-1.90198150087953	Putative uncharacterized protein
Cc07_g04240	GSCOC_T00039676001	-1.90175677212055	Putative chlororespiratory reduction 7
Cc02_g04610	GSCOC_T00020378001	-1.90112120211561	Derlin-1.2
Cc11_g15400	GSCOC_T00038050001	-1.90003228796995	Protein NSP-INTERACTING KINASE 3
Cc02_g38860	GSCOC_T00027800001	-1.89825690650497	Uncharacterized protein At4g01150, chloroplastic
Cc07_g14730	GSCOC_T00036574001	-1.89762121019289	Putative FAD/NAD(P)-binding oxidoreductase family protein
Cc07_g11600	GSCOC_T00036983001	-1.89754768537877	MATE efflux family protein 3, chloroplastic
Cc08_g01660	GSCOC_T00038350001	-1.8955111975026	Putative Disease resistance protein RPM1
Cc05_g11450	GSCOC_T00021313001	-1.89343930516039	Putative uncharacterized protein
Cc00_g03480	GSCOC_T00003113001	-1.89180271234072	Putative unknown protein; BEST Arabidopsis thaliana protein match is
Cc00_g15850	GSCOC_T00001708001	-1.89148504048651	Calreticulin-3
Cc05_g11780	GSCOC_T00021271001	-1.89075282718527	Putative Ribosomal protein L11 methyltransferase
Cc06_g14520	GSCOC_T00041247001	-1.88949750486666	Serine carboxypeptidase-like 29
Cc10_g02460	GSCOC_T00024749001	-1.88789834788369	Putative Ocs element-binding factor 1
Cc10_g03020	GSCOC_T00024817001	-1.88722048139119	Protein of unknown function (DUF1195)
Cc08_g08150	GSCOC_T00007257001	-1.88552315717399	Potassium channel KAT3
Cc06_g01310	GSCOC_T00023346001	-1.88225252992756	Rhodanese-like domain-containing protein 10
Cc08_g14140	GSCOC_T00030261001	-1.88225139699987	60S ribosomal protein L24-1
Cc06_g04850	GSCOC_T00043010001	-1.87756545736234	Peptidyl-prolyl cis-trans isomerase FKBP16-4, chloroplastic
Cc04_g05450	GSCOC_T00022297001	-1.87674017345954	ABC transporter I family member 17
Cc03_g02540	GSCOC_T00025904001	-1.87626067747064	Probable 1-deoxy-D-xylulose-5-phosphate synthase, chloroplastic
Cc02_g24580	GSCOC_T00028866001	-1.87336061767488	Probable plastid-lipid-associated protein 11, chloroplastic
Cc03_g06400	GSCOC_T00026434001	-1.87325390014786	Auxin-responsive protein IAA13
Cc06_g02220	GSCOC_T00023470001	-1.87315650798374	CASP-like protein At3g53850
Cc08_g00130	GSCOC_T00005568001	-1.8721534720343	Probable receptor-like protein kinase At1g80640
Cc02_g35130	GSCOC_T00012343001	-1.86760167071851	PsbP domain-containing protein 1, chloroplastic
Cc04_g09880	GSCOC_T00042519001	-1.86647660472323	Putative Heavy metal transport/detoxification superfamily protein
Cc06_g22760	GSCOC_T00040673001	-1.86639169524157	Probable S-acyltransferase At5g05070
Cc06_g07210	GSCOC_T00031293001	-1.86588020220697	Putative Lysosomal beta glucosidase
Cc05_g10170	GSCOC_T00021493001	-1.86473616655749	Peroxisomal (S)-2-hydroxy-acid oxidase
Cc03_g01570	GSCOC_T00025772001	-1.86439810816072	Putative Epoxide hydrolase 2
Cc02_g39120	GSCOC_T00027761001	-1.8634074114679	Putative WRKY transcription factor 30
Cc10_g11270	GSCOC_T00018481001	-1.86256861406824	Putative late blight resistance protein homolog R1A-6
Cc03_g07130	GSCOC_T00026550001	-1.86208610144045	Putative Root hair defective 3 GTP-binding
Cc04_g05170	GSCOC_T00022262001	-1.86118375360551	Putative receptor-like protein kinase At1g80870
Cc03_g02170	GSCOC_T00025854001	-1.85990201731304	Putative Tip elongation aberrant protein 1
Cc07_g15850	GSCOC_T00036418001	-1.85875500783462	Putative Gamma-glutamyltranspeptidase 1
Cc04_g10890	GSCOC_T00042664001	-1.85741234580175	Leucine-rich repeat receptor-like serine/threonine/tyrosine-protein kinase SOBIR1
Cc09_g07230	GSCOC_T00036293001	-1.85726083928791	Bifunctional dihydrofolate reductase-thymidylate synthase 2
Cc07_g04560	GSCOC_T00039712001	-1.85666383813869	O-fucosyltransferase family protein
Cc11_g14720	GSCOC_T00032019001	-1.85614646379066	Carbonic anhydrase, chloroplastic
Cc07_g08550	GSCOC_T00040232001	-1.8508176679599	Probable non-specific lipid-transfer protein AKCS9
Cc02_g26880	GSCOC_T00024997001	-1.84937082309069	Putative Cytokinesis negative regulator RCP1
Cc06_g05710	GSCOC_T00043135001	-1.84302797211777	Putative uncharacterized protein
Cc07_g12390	GSCOC_T00036879001	-1.84290352896789	Putative uncharacterized protein
Cc07_g14260	GSCOC_T00036637001	-1.84269150476597	Putative Probable mitochondrial 2-oxoglutarate/malate carrier protein
Cc02_g13170	GSCOC_T00029191001	-1.84250952457136	Sphingolipid delta(4)-desaturase DES1
Cc10_g03310	GSCOC_T00024854001	-1.84162005272989	Geranylgeranyl pyrophosphate synthase, chloroplastic
Cc06_g06030	GSCOC_T00043173001	-1.83893109531429	unknown protein; Has 68 Blast hits to 67 proteins in 21 species
Cc04_g02480	GSCOC_T00021920001	-1.8380064622408	IQ-domain 26
Cc11_g06560	GSCOC_T00020675001	-1.83558117338806	Putative late blight resistance protein homolog R1B-14
Cc08_g15680	GSCOC_T00035508001	-1.8347316146261	Ubiquitin-conjugating enzyme E2 10
Cc08_g13580	GSCOC_T00030326001	-1.831736312899	Probable sugar phosphate/phosphate translocator At1g12500
Cc00_g17850	GSCOC_T00008901001	-1.83027719103911	Putative UDP-glycosyltransferase 91C1
Cc07_g13000	GSCOC_T00036804001	-1.82625932809343	unknown protein; CONTAINS InterPro DOMAIN/s
Cc03_g08400	GSCOC_T00033256001	-1.82513222204171	DNAJ-like 20
Cc00_g03200	GSCOC_T00011582001	-1.82320008343721	Protein SRG1
Cc02_g06450	GSCOC_T00039179001	-1.82311013253784	Putative Double Clp-N motif-containing P-loop nucleoside triphosphate hydrolases superfamily protein
Cc02_g33750	GSCOC_T00015424001	-1.82098514199118	Putative E3 ubiquitin-protein ligase ATL6
Cc06_g21650	GSCOC_T00015553001	-1.81891956875185	Protein of unknown function (DUF630 and DUF632)
Cc11_g15820	GSCOC_T00038104001	-1.81813341445034	Hypothetical protein
Cc02_g16540	GSCOC_T00014147001	-1.81648685806851	Triosephosphate isomerase, chloroplastic
Cc03_g05780	GSCOC_T00026346001	-1.81480051633966	Fibrillin 4
Cc08_g04890	GSCOC_T00042481001	-1.81436100778735	Putative Cysteine/Histidine-rich C1 domain family protein
Cc01_g02660	GSCOC_T00013192001	-1.81169870385838	Putative Taxadien-5-alpha-ol O-acetyltransferase
Cc07_g02320	GSCOC_T00039418001	-1.81151025239141	Putative Serine/threonine-protein kinase HT1
Cc00_g14310	GSCOC_T00011140001	-1.81074151919428	NADP-dependent D-sorbitol-6-phosphate dehydrogenase
Cc02_g04950	GSCOC_T00038987001	-1.80975741348344	Putative Pentatricopeptide repeat-containing protein At1g02060, chloroplastic
Cc09_g10260	GSCOC_T00041066001	-1.80508233039247	Protein of unknown function (DUF3353)
Cc11_g14190	GSCOC_T00032093001	-1.80464068849208	IAA-amino acid hydrolase ILR1-like 2
Cc10_g01220	GSCOC_T00024591001	-1.80298287539491	Thioredoxin superfamily protein
Cc02_g16950	GSCOC_T00014197001	-1.80221615582814	Probable fructose-bisphosphate aldolase 2, chloroplastic
Cc09_g04550	GSCOC_T00017412001	-1.80115971086781	Leucine-rich repeat receptor-like serine/threonine-protein kinase BAM3
Cc10_g15550	GSCOC_T00033741001	-1.79861156620669	Putative Predicted protein
Cc02_g21400	GSCOC_T00014781001	-1.79443152810353	Metacaspase-1
Cc02_g01650	GSCOC_T00019993001	-1.79442984723144	CCT motif family protein
Cc02_g39110	GSCOC_T00027762001	-1.7937680575838	Putative Dihydroflavonol-4-reductase
Cc11_g11280	GSCOC_T00032466001	-1.79250776336853	Chaperonin 60 subunit beta 4, chloroplastic
Cc06_g06280	GSCOC_T00031402001	-1.79233654809439	unknown protein; LOCATED IN
Cc08_g01780	GSCOC_T00038336001	-1.79226735915964	Probable purine permease 9
Cc01_g14360	GSCOC_T00028434001	-1.79220982342356	Putative Probable NADH dehydrogenase
Cc01_g06530	GSCOC_T00030041001	-1.79211479492745	Early nodulin-like protein
Cc02_g16100	GSCOC_T00014085001	-1.79178881341725	Integrin-linked protein kinase family
Cc04_g05480	GSCOC_T00022302001	-1.79077416779445	Predicted protein
Cc07_g03170	GSCOC_T00039535001	-1.79062716666684	Putative Aldose 1-epimerase
Cc01_g15420	GSCOC_T00016562001	-1.79032597892325	Probable LRR receptor-like serine/threonine-protein kinase At1g06840
Cc04_g03790	GSCOC_T00022085001	-1.78731891813104	Putative Root phototropism protein 3
Cc04_g05520	GSCOC_T00022311001	-1.78700548780879	Unknown protein DS12 from 2D-PAGE of leaf, chloroplastic
Cc06_g13370	GSCOC_T00041408001	-1.78691541185068	4-coumarate--CoA ligase 1
Cc11_g17290	GSCOC_T00038291001	-1.78341244610673	Peptidyl-prolyl cis-trans isomerase CYP20-2, chloroplastic
Cc02_g03460	GSCOC_T00020230001	-1.78258564570329	unknown protein; FUNCTIONS IN
Cc09_g10620	GSCOC_T00041022001	-1.78100671581851	Putative LysM domain-containing GPI-anchored protein 2
Cc06_g06710	GSCOC_T00031349001	-1.781004726042	Putative Nuclear transcription factor Y subunit A-2
Cc00_g03700	GSCOC_T00013256001	-1.7801335300862	Codeine O-demethylase
Cc06_g13300	GSCOC_T00041417001	-1.77790429160268	P-loop containing nucleoside triphosphate hydrolases superfamily protein
Cc01_g20400	GSCOC_T00015938001	-1.77753015170647	Chaperone DnaJ-domain superfamily protein
Cc02_g20520	GSCOC_T00014666001	-1.77748505832752	Putative Predicted protein
Cc07_g19530	GSCOC_T00018561001	-1.77376824103382	Putative Filament-like plant protein 3
Cc03_g09790	GSCOC_T00030969001	-1.77307025859787	Probable aldo-keto reductase 2
Cc00_g23200	GSCOC_T00012798001	-1.77279950910793	Putative Root hair defective 3 GTP-binding
Cc01_g20190	GSCOC_T00015962001	-1.77034630887123	Putative Xanthoxin dehydrogenase
Cc05_g09700	GSCOC_T00021549001	-1.76931619923748	Uncharacterized protein
Cc10_g01700	GSCOC_T00024656001	-1.76931599756999	Putative uncharacterized protein
Cc04_g15820	GSCOC_T00042368001	-1.76864626141336	ABC transporter C family member 3
Cc05_g12090	GSCOC_T00021233001	-1.76840358556707	Putative Protein of unknown function (DUF2921)
Cc02_g22410	GSCOC_T00014912001	-1.7656374167653	Putative Elongation of fatty acids protein 1
Cc10_g01910	GSCOC_T00024684001	-1.76421983656316	S-adenosyl-L-methionine-dependent methyltransferases superfamily protein
Cc02_g11230	GSCOC_T00029438001	-1.7637874340108	Phenylalanine ammonia-lyase
Cc10_g04440	GSCOC_T00034934001	-1.76143403258716	Putative Patatin group A-3
Cc02_g05980	GSCOC_T00039120001	-1.7604929822427	Putative uncharacterized protein
Cc04_g14650	GSCOC_T00040725001	-1.75918963779119	L-type lectin-domain containing receptor kinase IV.1
Cc00_g20670	GSCOC_T00001284001	-1.7577066915185	NAD(P)H dehydrogenase 18
Cc05_g03650	GSCOC_T00017360001	-1.75725045729643	Putative Allene oxide synthase, chloroplastic
Cc08_g00210	GSCOC_T00005577001	-1.75678113707171	Homeobox protein knotted-1-like 3
Cc01_g12450	GSCOC_T00028181001	-1.75300884398361	Actin-depolymerizing factor 1
Cc08_g02620	GSCOC_T00037740001	-1.74870848106599	unknown protein; FUNCTIONS IN
Cc02_g15390	GSCOC_T00013985001	-1.7484230379926	Shaggy-related protein kinase eta
Cc04_g10850	GSCOC_T00042658001	-1.74809365315531	Abhydrolase domain-containing protein FAM108C1
Cc11_g08290	GSCOC_T00032897001	-1.74702275364934	DELLA protein GAI1
Cc01_g15720	GSCOC_T00016529001	-1.74588786443549	Putative uncharacterized protein
Cc05_g14450	GSCOC_T00038818001	-1.74579760491505	Putative Acyl-CoA--sterol O-acyltransferase 1
Cc07_g00640	GSCOC_T00019142001	-1.74372720807853	FUNCTIONS IN
Cc05_g13160	GSCOC_T00021099001	-1.74362428063289	Kinesin-3
Cc02_g06610	GSCOC_T00039203001	-1.73964016583438	Alpha/beta hydrolase related protein
Cc08_g03490	GSCOC_T00034129001	-1.7381490542355	Glycerol-3-phosphate acyltransferase, chloroplastic
Cc08_g09250	GSCOC_T00017270001	-1.73756786625119	Phosphorylase superfamily protein
Cc05_g05260	GSCOC_T00035089001	-1.73742667372918	Putative pterin-4-alpha-carbinolamine dehydratase
Cc07_g06820	GSCOC_T00040007001	-1.73510547229223	Uncharacterized protein At2g23090
Cc08_g05140	GSCOC_T00042443001	-1.73437836313303	Plant protein of unknown function (DUF946)
Cc07_g12340	GSCOC_T00036887001	-1.73279740868693	Putative Cucumisin
Cc02_g02820	GSCOC_T00020150001	-1.73021625191516	Pectinacetylesterase family protein
Cc01_g09010	GSCOC_T00023942001	-1.73016211113467	Rho GTPase activating protein with PAK-box/P21-Rho-binding domain
Cc02_g07750	GSCOC_T00029897001	-1.72981912491985	Putative Elicitor-responsive protein 1
Cc05_g06060	GSCOC_T00035212001	-1.72838724030768	diacylglycerol kinase 5
Cc07_g15660	GSCOC_T00036449001	-1.72626253584691	binding
Cc08_g16830	GSCOC_T00035658001	-1.72575212215888	unknown protein; BEST Arabidopsis thaliana protein match is
Cc03_g07120	GSCOC_T00026549001	-1.72566536536274	Putative Root hair defective 3 GTP-binding
Cc07_g12300	GSCOC_T00036893001	-1.72566374809214	Auxin efflux carrier family protein
Cc01_g11560	GSCOC_T00028058001	-1.72564470048965	alpha/beta-Hydrolases superfamily protein
Cc02_g19320	GSCOC_T00014497001	-1.72099270405426	Methylthioribose kinase
Cc01_g10520	GSCOC_T00024150001	-1.71986425855066	Putative Heavy metal transport/detoxification superfamily protein
Cc01_g21140	GSCOC_T00005018001	-1.71879960216457	Putative Probable polygalacturonase
Cc00_g00600	GSCOC_T00036154001	-1.71822032005103	Putative uncharacterized protein
Cc02_g17840	GSCOC_T00014312001	-1.71814088433593	PPPDE putative thiol peptidase family protein
Cc03_g07240	GSCOC_T00026568001	-1.71777733984885	Purple acid phosphatase 23
Cc02_g27980	GSCOC_T00025156001	-1.71511692321121	NADPH
Cc11_g05890	GSCOC_T00020564001	-1.71474690978725	Probable xyloglucan endotransglucosylase/hydrolase protein 27
Cc06_g16450	GSCOC_T00030691001	-1.71295979905411	nucleolar protein gar2-related
Cc11_g10810	GSCOC_T00032527001	-1.70762000447804	Phosphoenolpyruvate carboxylase 4
Cc11_g10330	GSCOC_T00032591001	-1.70643365555757	Putative uncharacterized protein
Cc01_g20370	GSCOC_T00015941001	-1.70425640469593	Glutaredoxin-C13
Cc03_g05220	GSCOC_T00026270001	-1.70340187263017	1-aminocyclopropane-1-carboxylate oxidase homolog
Cc07_g09730	GSCOC_T00037204001	-1.69716390418541	alpha/beta-Hydrolases superfamily protein
Cc02_g39400	GSCOC_T00027722001	-1.69518164247243	Putative Uncharacterized membrane protein yuiD
Cc01_g15700	GSCOC_T00016532001	-1.6893306136481	MLO-like protein 1
Cc08_g06450	GSCOC_T00036032001	-1.68532230688603	UDP-glycosyltransferase 74E2
Cc03_g05580	GSCOC_T00026317001	-1.68527703154257	Putative Protein tas
Cc01_g16390	GSCOC_T00016448001	-1.6847188797731	Putative Transcription factor bHLH62
Cc00_g30080	GSCOC_T00013320001	-1.68247146539045	Protein COBRA
Cc07_g09810	GSCOC_T00037195001	-1.68125648576744	Dihydroflavonol-4-reductase
Cc03_g16290	GSCOC_T00002098001	-1.68073408009091	50S ribosomal protein L6, chloroplastic
Cc01_g19720	GSCOC_T00016021001	-1.67881665708036	DUF21 domain-containing protein At4g14240
Cc00_g32410	GSCOC_T00006083001	-1.6787557692783	Protein SRG1
Cc10_g07070	GSCOC_T00034570001	-1.67867361319685	Probable pectin methyltransferase QUA2
Cc04_g13610	GSCOC_T00003550001	-1.6757843842917	ABC transporter G family member 11
Cc05_g11210	GSCOC_T00021344001	-1.67416667252291	Putative UDP-N-acetylglucosamine 1-carboxyvinyltransferase
Cc02_g22350	GSCOC_T00014904001	-1.67410334014283	Probable plastid-lipid-associated protein 4, chloroplastic
Cc06_g20840	GSCOC_T00015863001	-1.67283703865206	Putative Protein CHLOROPLAST IMPORT APPARATUS 2
Cc08_g14970	GSCOC_T00035416001	-1.6723129947964	unknown protein; FUNCTIONS IN
Cc07_g06990	GSCOC_T00040031001	-1.66966641347231	Formin-like protein 6
Cc05_g06480	GSCOC_T00042138001	-1.66916488225606	Putative transferases;folic acid binding
Cc02_g06200	GSCOC_T00039145001	-1.66887109776283	Putative Transcription factor bHLH51
Cc00_g28270	GSCOC_T00010422001	-1.66875897402383	Putative UDP-glycosyltransferase 75C1
Cc02_g13860	GSCOC_T00029087001	-1.66637366922037	Triose phosphate/phosphate translocator, chloroplastic
Cc07_g12290	GSCOC_T00036895001	-1.66627896614353	Auxin efflux carrier family protein
Cc00_g29130	GSCOC_T00010957001	-1.66432089741724	Putative Protein ROOT HAIR DEFECTIVE 3 homolog 1
Cc00_g30520	GSCOC_T00013512001	-1.66209494635392	Putative Miraculin
Cc03_g15660	GSCOC_T00026858001	-1.66168659512048	NADP-dependent alkenal double bond reductase P1
Cc04_g00370	GSCOC_T00021642001	-1.66113190106712	proton gradient regulation 7
Cc02_g21220	GSCOC_T00014759001	-1.6609242980593	14-3-3 protein 6
Cc04_g07340	GSCOC_T00022547001	-1.65937892951263	Putative Predicted protein
Cc11_g16530	GSCOC_T00038193001	-1.65880740561032	Ankyrin repeat family protein
Cc02_g05540	GSCOC_T00039065001	-1.65821815901572	Phosphoglucan phosphatase LSF2, chloroplastic
Cc01_g11090	GSCOC_T00024227001	-1.6560714778592	Homeobox-leucine zipper protein REVOLUTA
Cc02_g25100	GSCOC_T00028794001	-1.6543668986285	Protein of unknown function (DUF630 and DUF632)
Cc00_g08890	GSCOC_T00007806001	-1.6542909210504	Endonuclease, putative
Cc01_g10940	GSCOC_T00024210001	-1.65295236606099	Putative cyclic nucleotide-gated ion channel 15
Cc07_g05400	GSCOC_T00039811001	-1.65187416258285	homolog of Synechocystis YCF37
Cc11_g05820	GSCOC_T00020553001	-1.65082380935813	Purple acid phosphatase 3
Cc09_g03220	GSCOC_T00017577001	-1.65065645753716	Predicted protein
Cc07_g02430	GSCOC_T00039434001	-1.64957503437674	RING-H2 finger protein ATL46
Cc06_g08130	GSCOC_T00031169001	-1.6475258889598	Receptor-like serine/threonine-protein kinase At3g01300
Cc08_g03280	GSCOC_T00010791001	-1.64663247794734	Putative Transcription repressor KAN1
Cc08_g01640	GSCOC_T00038355001	-1.64115319651567	Putative Disease resistance protein RPM1
Cc02_g12940	GSCOC_T00029218001	-1.63934589244866	Putative Epoxide hydrolase 2
Cc10_g02470	GSCOC_T00024750001	-1.63857166337252	conserved peptide upstream open reading frame 5
Cc06_g18240	GSCOC_T00040431001	-1.63845618338308	Glucan endo-1,3-beta-glucosidase, acidic isoform PR-Q'
Cc01_g12720	GSCOC_T00028216001	-1.63839769734888	Heat shock cognate 70 kDa protein
Cc10_g09150	GSCOC_T00034289001	-1.63829528078656	Putative UPF0301 protein Cag_1601
Cc00_g12680	GSCOC_T00005848001	-1.638229543198	Putative Glutathione transferase GST 23
Cc05_g16080	GSCOC_T00038607001	-1.637575202127	Protein Iojap
Cc10_g05010	GSCOC_T00034863001	-1.6352629301281	Pollen-specific protein SF3
Cc02_g19400	GSCOC_T00014506001	-1.63264869481359	Alpha-L-fucosidase 2
Cc00_g23350	GSCOC_T00012066001	-1.63108521672908	Putative O-acyltransferase WSD1
Cc11_g15620	GSCOC_T00038079001	-1.63078587093079	Putative Primary amine oxidase
Cc07_g07530	GSCOC_T00040103001	-1.62535964249867	Putative Lysosomal Pro-X carboxypeptidase
Cc04_g06840	GSCOC_T00022483001	-1.62486949617476	Putative RING/U-box superfamily protein
Cc07_g08070	GSCOC_T00040169001	-1.6247044968536	Probable fructokinase-4
Cc02_g02280	GSCOC_T00020078001	-1.62215278668803	Putative Uncharacterized protein P11E10.01
Cc02_g05390	GSCOC_T00039046001	-1.6220524559526	Putative Chalcone--flavonone isomerase
Cc00_g04330	GSCOC_T00010986001	-1.62180486794364	Miraculin
Cc02_g30610	GSCOC_T00023793001	-1.62071247801047	Putative UDP-XYL synthase 5
Cc07_g02170	GSCOC_T00039400001	-1.61660481938615	Protease Do-like 1, chloroplastic
Cc06_g09180	GSCOC_T00041948001	-1.61640535496391	Putative Uncharacterized sodium-dependent transporter yocS
Cc02_g36740	GSCOC_T00003885001	-1.61267817488253	Glutathione S-transferase zeta class
Cc03_g08410	GSCOC_T00033258001	-1.6109788524464	Putative HXXXD-type acyl-transferase family protein
Cc02_g16530	GSCOC_T00014146001	-1.60051506560808	Triosephosphate isomerase, chloroplastic
Cc07_g14880	GSCOC_T00036558001	-1.6003349629848	UDP-glycosyltransferase 85A1
Cc11_g01310	GSCOC_T00019592001	-1.5996185019619	Transcriptional corepressor LEUNIG
Cc10_g13330	GSCOC_T00035311001	-1.59936281463421	Putative Uncharacterized acetyltransferase At3g50280
Cc07_g00950	GSCOC_T00019177001	-1.59800194826477	unknown protein; FUNCTIONS IN
Cc07_g14180	GSCOC_T00036648001	-1.59657528990064	Putative Reticuline oxidase-like protein
Cc02_g21250	GSCOC_T00014762001	-1.59483717426446	Putative Probable 1,4-dihydroxy-2-naphthoate octaprenyltransferase
Cc03_g08100	GSCOC_T00033202001	-1.593804897241	Probable sucrose-phosphate synthase 2
Cc01_g01770	GSCOC_T00037850001	-1.59145908050058	Putative disease resistance RPP13-like protein 1
Cc04_g16790	GSCOC_T00035789001	-1.5865142920052	Putative Probable serine/threonine-protein kinase Cx32, chloroplastic
Cc04_g05830	GSCOC_T00022350001	-1.58579465470792	Glycine--tRNA ligase 1, mitochondrial

## Sheet: SWD_vs_WW_aCO2_up
Gene ID	TID	Log2FC	Protein Name
Cc06_g05620	GSCOC_T00043121001	12.7358735778651	Probable purple acid phosphatase 20
Cc03_g08940	GSCOC_T00042742001	10.6172006985737	Hypothetical protein
Cc08_g11420	GSCOC_T00027143001	10.2883624840633	Expansin-like B1
Cc00_g15520	GSCOC_T00000738001	10.2110083284425	Beta-fructofuranosidase, insoluble isoenzyme 1
Cc04_g10590	GSCOC_T00042615001	10.0972397281945	Putative Cytochrome P450 82A1 (Fragment)
Cc07_g04930	GSCOC_T00039754001	9.96562081889339	Putative TRICHOME BIREFRINGENCE-LIKE 19
Cc11_g06140	GSCOC_T00020608001	9.44918575115125	Putative Flavanone 7-O-glucoside 2''-O-beta-L-rhamnosyltransferase
Cc08_g00160	GSCOC_T00005571001	9.12292067905121	Putative Transmembrane 9 superfamily member 4
Cc02_g03430	GSCOC_T00020227001	8.87202052135876	Dehydration-responsive element-binding protein 1D
Cc04_g11660	GSCOC_T00037368001	8.57060227555175	Aldehyde dehydrogenase family 2 member C4
Cc08_g11410	GSCOC_T00027142001	8.35663437530466	Expansin-like B1
Cc02_g19460	GSCOC_T00014514001	8.29840100084096	Probable indole-3-acetic acid-amido synthetase GH3.1
Cc07_g13640	GSCOC_T00036712001	8.21551726877323	Putative Rhamnogalacturonate lyase
Cc06_g09490	GSCOC_T00041906001	8.21306794177388	Probable sulfate transporter 3.5
Cc05_g04940	GSCOC_T00035039001	8.15594414619275	Isocitrate lyase
Cc10_g08940	GSCOC_T00034320001	7.96144661308742	alpha/beta-Hydrolases superfamily protein
Cc06_g00670	GSCOC_T00023255001	7.94713294985985	Sex determination protein tasselseed-2
Cc05_g00080	GSCOC_T00017025001	7.93302049123667	Late embryogenesis abundant protein EMB564
Cc09_g03110	GSCOC_T00017588001	7.92520579006086	GDSL esterase/lipase At5g33370
Cc00_g03750	GSCOC_T00013262001	7.9132415172284	Putative ABC transporter B family member 9
Cc10_g08590	GSCOC_T00034368001	7.88854509788897	Putative Probable protein phosphatase 2C 74
Cc11_g07770	GSCOC_T00018007001	7.85847629130811	Pathogenesis-related protein R major form
Cc01_g07390	GSCOC_T00030175001	7.79960349534093	Alcohol dehydrogenase-like 7
Cc08_g13570	GSCOC_T00030328001	7.64357664786614	Putative Mavicyanin
Cc03_g12510	GSCOC_T00015209001	7.5194933312885	Hypothetical protein
Cc06_g19120	GSCOC_T00028963001	7.50803467448945	Hypothetical protein
Cc07_g16730	GSCOC_T00037525001	7.45804698143539	DNA binding protein, putative
Cc02_g15140	GSCOC_T00013950001	7.41591554232857	transcription factor-related
Cc02_g15760	GSCOC_T00014035001	7.22287009618692	Isoflavone 2'-hydroxylase
Cc11_g17390	GSCOC_T00038305001	7.20895248300056	Putative Bidirectional sugar transporter SWEET15
Cc07_g05950	GSCOC_T00039884001	7.02767689548971	Putative Multidrug and toxin extrusion protein 1
Cc00_g21210	GSCOC_T00009603001	6.63664480471236	myb domain protein 108
Cc04_g08040	GSCOC_T00022652001	6.61439982856781	Tropinone reductase homolog At1g07440
Cc11_g08110	GSCOC_T00032920001	6.37640269312222	Protein PLANT CADMIUM RESISTANCE 2
Cc06_g01800	GSCOC_T00023414001	6.11882328986035	Putative DUF246 domain-containing protein At1g04910
Cc07_g03560	GSCOC_T00039595001	6.11864462092198	Casparian strip membrane protein POPTRDRAFT_569472
Cc02_g04750	GSCOC_T00020397001	5.90997872653889	Oleosin 1
Cc01_g08410	GSCOC_T00015547001	5.88067099873529	Putative Lysosomal beta glucosidase
Cc01_g14440	GSCOC_T00028443001	5.86471502046845	Putative uncharacterized protein
Cc09_g03320	GSCOC_T00017564001	5.66868476396799	Putative uncharacterized protein
Cc05_g13060	GSCOC_T00021109001	5.53513385743508	(-)-germacrene D synthase
Cc07_g05000	GSCOC_T00039761001	5.50681115271517	Putative Protein GAMETE EXPRESSED 3
Cc06_g06090	GSCOC_T00043180001	5.48523285493862	Beta-fructofuranosidase, insoluble isoenzyme 1
Cc03_g03530	GSCOC_T00026043001	5.38420578088357	Sugar transport protein 8
Cc03_g12230	GSCOC_T00015260001	5.15624533982344	Desiccation-related protein PCC13-62
Cc02_g39250	GSCOC_T00027744001	5.00785913538826	Long chain acyl-CoA synthetase 4
Cc01_g08300	GSCOC_T00015533001	4.95575060839127	Alcohol dehydrogenase-like 7
Cc10_g15150	GSCOC_T00033683001	4.94899132117693	Peroxidase 12
Cc09_g10820	GSCOC_T00040998001	4.82029564990997	Putative Bifunctional dihydroflavonol 4-reductase/flavanone 4-reductase
Cc06_g01030	GSCOC_T00023309001	4.81603560508989	Putative UPF0098 protein MTH_273
Cc07_g11420	GSCOC_T00037003001	4.790678413209	IQ-domain 20
Cc11_g11050	GSCOC_T00032490001	4.78896426330844	Putative Protein of unknown function (DUF1262)
Cc02_g19470	GSCOC_T00014515001	4.78670868631871	Indole-3-acetic acid-amido synthetase GH3.3
Cc06_g18250	GSCOC_T00040432001	4.75401331673316	Probable glutathione S-transferase parC
Cc11_g16400	GSCOC_T00038178001	4.73300988124949	GRAS family transcription factor
Cc11_g09980	GSCOC_T00032644001	4.72312382972003	Putative Universal stress protein A-like protein
Cc03_g10010	GSCOC_T00031000001	4.7151624801247	Putative Rho GDP-dissociation inhibitor 2
Cc06_g06080	GSCOC_T00043179001	4.65433452153662	Beta-fructofuranosidase, insoluble isoenzyme 1
Cc10_g01190	GSCOC_T00024586001	4.62426788030974	Pentatricopeptide repeat-containing protein At1g20230
Cc07_g13660	GSCOC_T00036709001	4.61670358522553	Geraniol dehydrogenase 1
Cc02_g25390	GSCOC_T00028752001	4.4844531153916	Uncharacterized protein At1g28695
Cc10_g02520	GSCOC_T00024756001	4.4785830693266	Putative Sec14 cytosolic factor
Cc01_g13170	GSCOC_T00028280001	4.38776385668123	Hypothetical protein
Cc02_g13150	GSCOC_T00029193001	4.38291426580196	Putative pre-mRNA-splicing factor ATP-dependent RNA helicase DHX16
Cc01_g00360	GSCOC_T00012396001	4.37147811076495	L-ascorbate oxidase homolog
Cc00_g16640	GSCOC_T00013787001	4.36199469025442	Phosphate transporter PHO1 homolog 10
Cc04_g16290	GSCOC_T00035715001	4.32027289283836	NAC domain-containing protein 100
Cc02_g22570	GSCOC_T00014932001	4.31107142389804	Putative RmlC-like cupins superfamily protein
Cc01_g17670	GSCOC_T00016295001	4.29419735289636	Ammonium transporter 1 member 2
Cc04_g04030	GSCOC_T00022120001	4.26877834900429	Hypothetical protein
Cc08_g08470	GSCOC_T00009040001	4.2260616744647	Putative Dehydration-responsive protein RD22
Cc05_g04090	GSCOC_T00031589001	4.2073219076218	mitogen-activated protein kinase kinase kinase 18
Cc01_g13250	GSCOC_T00028289001	4.15602074101484	Putative Homeodomain-like superfamily protein
Cc10_g03180	GSCOC_T00024840001	4.1429013221979	Putative uncharacterized protein
Cc09_g07410	GSCOC_T00036265001	4.14087731160766	Reticuline oxidase-like protein
Cc06_g08580	GSCOC_T00031111001	4.13321778412037	Nitrate transporter 1.4
Cc03_g05190	GSCOC_T00026267001	4.0546133165039	1-aminocyclopropane-1-carboxylate oxidase homolog 3
Cc11_g08170	GSCOC_T00032911001	4.04343826652341	Putative 21 kDa protein
Cc06_g08260	GSCOC_T00031153001	3.99570958396943	Putative Umecyanin
Cc00_g04190	GSCOC_T00006614001	3.95585338674047	60S ribosomal protein L10-2
Cc02_g39970	GSCOC_T00027635001	3.94651392046967	Late embryogenesis abundant (LEA) hydroxyproline-rich glycoprotein family
Cc08_g01050	GSCOC_T00038435001	3.92078297597753	Chalcone-flavanone isomerase family protein
Cc01_g01870	GSCOC_T00019259001	3.86030437404022	Pre-mRNA-processing-splicing factor 8
Cc11_g11380	GSCOC_T00032451001	3.82083504375461	Putative Redox-regulatory protein FAM213A
Cc11_g07780	GSCOC_T00018006001	3.81714421798248	Pathogenesis-related protein R major form
Cc03_g04540	GSCOC_T00026176001	3.72038242432463	3-ketoacyl-CoA synthase 17
Cc01_g20380	GSCOC_T00015940001	3.70568045729587	Glutaredoxin-C11
Cc11_g13890	GSCOC_T00032127001	3.67844476288885	Putative Predicted protein
Cc07_g13290	GSCOC_T00036762001	3.66766356258184	Glutamine synthetase cytosolic isozyme 2
Cc02_g07880	GSCOC_T00029879001	3.66044837777457	Putative ENTH/VHS family protein
Cc05_g16100	GSCOC_T00038605001	3.65747898051189	Putative SBP (S-ribonuclease binding protein) family protein
Cc02_g19820	GSCOC_T00014558001	3.65605409837989	Putative Uncharacterized protein
Cc05_g12770	GSCOC_T00021147001	3.65318810683784	Hypothetical protein
Cc08_g15170	GSCOC_T00035443001	3.64860101714781	Heat shock protein 83
Cc10_g07290	GSCOC_T00034542001	3.63675171306941	Putative Probable LRR receptor-like serine/threonine-protein kinase At4g08850
Cc02_g23140	GSCOC_T00014996001	3.61268738895153	Protein of unknown function (DUF679)
Cc08_g10740	GSCOC_T00027051001	3.57152998261391	Beta-fructofuranosidase, insoluble isoenzyme CWINV1
Cc00_g32800	GSCOC_T00001453001	3.5520506898576	unknown protein; FUNCTIONS IN
Cc09_g03240	GSCOC_T00017575001	3.55044993980302	Putative F-box protein At2g02240
Cc02_g00920	GSCOC_T00019893001	3.51296542030816	Putative IQ-domain 18
Cc07_g01010	GSCOC_T00019186001	3.44253797849213	GRAS family transcription factor
Cc06_g16680	GSCOC_T00030651001	3.4407564706111	Putative polyol transporter 1
Cc02_g33190	GSCOC_T00015336001	3.39231262811493	Luminal-binding protein 5
Cc06_g03490	GSCOC_T00023633001	3.3769816964224	L-ascorbate peroxidase 2, cytosolic
Cc02_g12850	GSCOC_T00029229001	3.36796744078745	Polyphenol oxidase, chloroplastic
Cc06_g02060	GSCOC_T00023446001	3.32161391024923	Putative Encodes a protein involved in salt tolerance, names SIS (Salt Induced Serine rich).
Cc02_g34800	GSCOC_T00011787001	3.31924793064865	Putative Protein of unknown function (DUF1645)
Cc06_g15450	GSCOC_T00030823001	3.30314490581748	Putative uncharacterized protein
Cc09_g02570	GSCOC_T00017659001	3.29384491388154	Putative Patatin group A-3
Cc10_g00570	GSCOC_T00024513001	3.25888061170626	Catalase
Cc03_g06550	GSCOC_T00026453001	3.14608884812484	AWPM-19-like family protein
Cc02_g37120	GSCOC_T00028035001	3.11285661974857	Putative peptidoglycan-binding LysM domain-containing protein
Cc11_g10140	GSCOC_T00032617001	3.08079920640804	LOB domain-containing protein 41
Cc02_g14040	GSCOC_T00029066001	3.07994205973572	Hypothetical protein
Cc03_g05410	GSCOC_T00026292001	3.07851117445722	Ethylene-responsive transcription factor 1B
Cc11_g13240	GSCOC_T00032208001	3.06607221726333	Putative unknown protein; BEST Arabidopsis thaliana protein match is
Cc02_g08330	GSCOC_T00029808001	3.05565643240665	Putative Zinc finger protein ZAT11
Cc11_g09140	GSCOC_T00032777001	3.0327447609566	Putative Probable S-adenosylmethionine-dependent methyltransferase At5g37990
Cc02_g14460	GSCOC_T00013857001	3.0308281101361	GDSL esterase/lipase At5g45920
Cc04_g07390	GSCOC_T00022556001	3.01094861038885	Actin-related protein 4
Cc06_g05110	GSCOC_T00043044001	3.00966484160941	unknown protein; FUNCTIONS IN
Cc00_g35100	GSCOC_T00004229001	3.00520849984825	Ent-kaur-16-ene synthase, chloroplastic
Cc06_g16790	GSCOC_T00004130001	2.99074572409454	Vignain
Cc08_g01860	GSCOC_T00037639001	2.98245759871459	Expansin-like B1
Cc06_g10870	GSCOC_T00041724001	2.94726452806661	Meiotic nuclear division protein 1 homolog
Cc05_g13070	GSCOC_T00021108001	2.92941768311702	(-)-germacrene D synthase
Cc06_g01670	GSCOC_T00023397001	2.92417252428432	Probable anion transporter 3, chloroplastic
Cc11_g04420	GSCOC_T00004786001	2.92197462348382	Hypothetical protein
Cc03_g07460	GSCOC_T00026598001	2.92097423295022	Cellulose synthase-like protein D1
Cc06_g01110	GSCOC_T00023322001	2.91748838101591	Late embryogenesis abundant protein B19.3
Cc02_g05860	GSCOC_T00039106001	2.91347693569519	Putative Cation/H( ) antiporter 15
Cc01_g04050	GSCOC_T00040848001	2.91162172719522	Putative G-type lectin S-receptor-like serine/threonine-protein kinase RLK1
Cc03_g01730	GSCOC_T00025795001	2.89764406214133	NAD(P)-binding Rossmann-fold superfamily protein
Cc11_g10010	GSCOC_T00032640001	2.89614314532144	Putative unknown protein; BEST Arabidopsis thaliana protein match is
Cc04_g09140	GSCOC_T00022793001	2.89488393344575	EC protein homolog 2
Cc11_g10990	GSCOC_T00032499001	2.88822915136125	Putative unknown protein; LOCATED IN
Cc02_g23250	GSCOC_T00015012001	2.88457870540161	Putative uncharacterized protein
Cc05_g06890	GSCOC_T00042205001	2.88457434642735	Putative Clathrin light chain 1
Cc09_g00710	GSCOC_T00017912001	2.87412715604128	Auxin-responsive family protein
Cc02_g34220	GSCOC_T00000658001	2.86714990339739	Hypoxia-responsive family protein
Cc08_g14510	GSCOC_T00030213001	2.85975941445975	Putative copper-transporting ATPase HMA5
Cc07_g09440	GSCOC_T00037242001	2.85477843270187	Cytochrome P450 90B1
Cc04_g02140	GSCOC_T00021882001	2.85368380103668	NADH dehydrogenase [ubiquinone] iron-sulfur protein 7, mitochondrial
Cc06_g05290	GSCOC_T00043072001	2.85196113861783	Putative PHYTOSULFOKINE 3 PRECURSOR
Cc10_g08450	GSCOC_T00034388001	2.84991017838164	Putative uncharacterized protein
Cc00_g27990	GSCOC_T00008908001	2.83857562634212	Glucan endo-1,3-beta-glucosidase
Cc07_g05140	GSCOC_T00039777001	2.83798266168138	Hypothetical protein
Cc08_g09460	GSCOC_T00026886001	2.83574028738886	Exosome complex CDSuclease RRP46 homolog
Cc11_g09350	GSCOC_T00032746001	2.8295186749151	Putative uncharacterized protein
Cc02_g22640	GSCOC_T00014941001	2.82857006807705	Putative DnaJ homolog subfamily B member 4
Cc11_g12780	GSCOC_T00032271001	2.82274047317926	Putative cAMP-regulated phosphoprotein 19-related protein
Cc07_g05130	GSCOC_T00039776001	2.79639071146931	Putative Protein of unknown function (DUF607)
Cc11_g17430	GSCOC_T00038314001	2.79470487673851	Pyruvate dehydrogenase E1 component subunit beta, mitochondrial
Cc03_g02240	GSCOC_T00025862001	2.79033498596143	Hypothetical protein
Cc00_g30840	GSCOC_T00006253001	2.78764523017276	Putative NAC domain-containing protein 29
Cc02_g18810	GSCOC_T00014436001	2.78427905517149	Abscisic acid 8'-hydroxylase 4
Cc07_g13880	GSCOC_T00036684001	2.7770050204237	Probable 1-deoxy-D-xylulose-5-phosphate synthase 2, chloroplastic
Cc06_g02300	GSCOC_T00023483001	2.7701552796232	Protein of unknown function (DUF604)
Cc07_g12900	GSCOC_T00036817001	2.76058510428043	Glutamate decarboxylase
Cc03_g00580	GSCOC_T00025641001	2.75041151831662	poly(A) polymerase 3
Cc05_g12340	GSCOC_T00021202001	2.74895543002027	Putative Stem-specific protein TSJT1
Cc02_g03180	GSCOC_T00020190001	2.73950087609767	Putative uncharacterized protein
Cc02_g35310	GSCOC_T00042866001	2.72571508536543	Plant neutral invertase family protein
Cc02_g15600	GSCOC_T00014014001	2.72301225797686	Putative unknown protein; FUNCTIONS IN
Cc06_g02650	GSCOC_T00023524001	2.71869412132511	Metallothionein-like protein 1
Cc07_g12210	GSCOC_T00036908001	2.71371696120007	RNA-binding (RRM/RBD/RNP motifs) family protein
Cc04_g10080	GSCOC_T00042543001	2.70285680117827	Malate synthase, glyoxysomal
Cc04_g03100	GSCOC_T00021999001	2.70166788547582	Putative Dynein light chain LC6, flagellar outer arm
Cc06_g10380	GSCOC_T00041787001	2.68879012400275	Hypothetical protein
Cc07_g18570	GSCOC_T00018734001	2.68577692065868	Ent-kaur-16-ene synthase, chloroplastic
Cc02_g33790	GSCOC_T00013092001	2.67554780214887	Probable linoleate 9S-lipoxygenase 5
Cc11_g10260	GSCOC_T00032600001	2.6717442204704	Glycolipid transfer protein (GLTP) family protein
Cc04_g14500	GSCOC_T00040692001	2.67093549248267	Ribulose bisphosphate carboxylase/oxygenase activase 1, chloroplastic
Cc11_g10830	GSCOC_T00032525001	2.66966774358131	ABC transporter G family member 21
Cc10_g05130	GSCOC_T00034851001	2.65420904879383	Putative Uncharacterised conserved protein UCP031279
Cc07_g13270	GSCOC_T00036764001	2.65325926218135	Putative uncharacterized protein
Cc00_g17930	GSCOC_T00008101001	2.64930293736308	Putative unknown protein; Has 35333 Blast hits to 34131 proteins in 2444 species
Cc04_g15680	GSCOC_T00042344001	2.64196536907289	Putative Ent-kaurenoic acid oxidase 1
Cc04_g12540	GSCOC_T00005318001	2.62592287892374	Cell division cycle protein 48 homolog
Cc03_g07810	GSCOC_T00026645001	2.62140669432989	Putative uncharacterized protein
Cc06_g15220	GSCOC_T00030862001	2.58146904424964	Hypothetical protein
Cc01_g13370	GSCOC_T00028302001	2.57261018470512	Putative Protein of unknown function (DUF604)
Cc08_g12330	GSCOC_T00030498001	2.56943739996059	Putative Metalloendoproteinase 1
Cc02_g35840	GSCOC_T00042783001	2.56214406274936	Putative Isopenicillin N epimerase
Cc03_g09490	GSCOC_T00030927001	2.55042789650749	Hypothetical protein
Cc05_g02920	GSCOC_T00033458001	2.54239236158325	1-aminocyclopropane-1-carboxylate oxidase 4
Cc07_g07300	GSCOC_T00040072001	2.54178929594119	ACT domain repeat 1
Cc02_g34760	GSCOC_T00011783001	2.54040109471407	Polynucleotidyl transferase, ribonuclease H-like superfamily protein
Cc03_g02250	GSCOC_T00025863001	2.53966023292187	Putative RING finger and CHY zinc finger domain-containing protein 1
Cc01_g10320	GSCOC_T00024120001	2.51495558082343	Putative RING finger and CHY zinc finger domain-containing protein 1
Cc06_g08370	GSCOC_T00031139001	2.51148212752666	EIN3-binding F-box protein 1
Cc03_g10990	GSCOC_T00042047001	2.50274040807641	Cytochrome P450 71A2
Cc04_g00640	GSCOC_T00021686001	2.49662625801807	Putative RING-H2 finger protein ATL3
Cc10_g08540	GSCOC_T00034375001	2.49180773297144	Cox19-like CHCH family protein
Cc10_g00730	GSCOC_T00024531001	2.49004997549446	unknown protein; BEST Arabidopsis thaliana protein match is
Cc01_g16570	GSCOC_T00016426001	2.48480554970522	Putative Chaperone protein dnaJ 20, chloroplastic
Cc06_g03110	GSCOC_T00023583001	2.48445645625538	Plant protein 1589 of unknown function
Cc07_g11910	GSCOC_T00036942001	2.48328089628175	Putative uncharacterized protein
Cc03_g03180	GSCOC_T00025997001	2.46575100819065	Putative Basic 7S globulin
Cc11_g11400	GSCOC_T00032449001	2.46456709665091	Putative Sodium-coupled neutral amino acid transporter 2
Cc09_g06810	GSCOC_T00005139001	2.45626387313436	Fe(2 ) transport protein 2
Cc06_g12400	GSCOC_T00041541001	2.44914259173492	inter-alpha-trypsin inhibitor heavy chain-related
Cc11_g00230	GSCOC_T00019448001	2.4462163490927	Putative Transducin/WD40 repeat-like superfamily protein
Cc01_g19140	GSCOC_T00016098001	2.40818048821373	Putative serine/threonine-protein kinase/receptor R826
Cc02_g06790	GSCOC_T00039229001	2.40343467126781	Nematode resistance protein-like HSPRO2
Cc01_g16880	GSCOC_T00016390001	2.39503721603075	Small ubiquitin-related modifier 1
Cc06_g04430	GSCOC_T00042952001	2.38918425508897	Major facilitator superfamily protein
Cc05_g10650	GSCOC_T00021413001	2.38547988629858	Bidirectional sugar transporter SWEET2
Cc02_g21010	GSCOC_T00014732001	2.38481824099803	Peptidyl-prolyl cis-trans isomerase FKBP12
Cc06_g02640	GSCOC_T00023523001	2.37182765221567	Putative Kinesin-like protein KIF22
Cc05_g01440	GSCOC_T00018223001	2.35854094025181	4-hydroxyphenylpyruvate dioxygenase
Cc03_g16160	GSCOC_T00002114001	2.34855217675344	Putative Glucose-1-phosphate adenylyltransferase small subunit, chloroplastic/amyloplastic
Cc01_g07650	GSCOC_T00015432001	2.34640275192504	Hypothetical protein
Cc07_g00290	GSCOC_T00019095001	2.34616062130304	Hypothetical protein
Cc06_g12690	GSCOC_T00041505001	2.3459876220939	ATP binding microtubule motor family protein
Cc07_g09480	GSCOC_T00037236001	2.33460304684361	Hypothetical protein
Cc05_g11710	GSCOC_T00021280001	2.33412213619378	Probable aminotransferase TAT2
Cc04_g14140	GSCOC_T00035943001	2.31769503649235	Putative Serine/threonine-protein kinase ATM
Cc04_g08890	GSCOC_T00022765001	2.31616512174273	DNA-directed RNA polymerase III subunit RPC2
Cc04_g08180	GSCOC_T00022670001	2.31461180567952	Probable phosphatidylinositol 4-kinase type 2-beta At1g26270
Cc06_g11570	GSCOC_T00041642001	2.29993983798463	Heat shock factor
Cc08_g10810	GSCOC_T00027060001	2.29600608704954	Heat shock factor protein HSF30
Cc08_g13180	GSCOC_T00030372001	2.28734848973451	UDP-glucuronate 4-epimerase 3
Cc05_g09870	GSCOC_T00021529001	2.28178618469049	Probable amino acid permease 7
Cc03_g09460	GSCOC_T00030923001	2.28018950389967	Hypothetical protein
Cc01_g17720	GSCOC_T00016290001	2.26572645305195	Tyrosine decarboxylase 1
Cc10_g06500	GSCOC_T00034647001	2.24538050381874	Purine permease 3
Cc05_g13670	GSCOC_T00021032001	2.24237927325216	Putative NEP1-interacting protein 1
Cc07_g18900	GSCOC_T00018674001	2.24127673531549	DNA polymerase delta catalytic subunit
Cc00_g19580	GSCOC_T00006064001	2.23876801425868	heteroglycan glucosidase 1
Cc06_g06500	GSCOC_T00031374001	2.23452961312572	Putative uncharacterized protein
Cc07_g09620	GSCOC_T00037218001	2.23353976404929	Putative Late embryogenesis abundant (LEA) protein
Cc10_g06630	GSCOC_T00034630001	2.22764173118371	Hypothetical protein
Cc03_g08920	GSCOC_T00042747001	2.22666104008023	Hypothetical protein
Cc00_g13780	GSCOC_T00013301001	2.21992254154271	Alpha-aminoadipic semialdehyde synthase
Cc01_g03180	GSCOC_T00033153001	2.21978034518587	Putative NB-ARC domain-containing disease resistance protein
Cc08_g04270	GSCOC_T00034246001	2.2151568273575	Hypothetical protein
Cc04_g08900	GSCOC_T00022766001	2.21376955681051	DNA-directed RNA polymerase III subunit rpc2
Cc01_g14420	GSCOC_T00028440001	2.21145109941906	Asparagine synthetase [glutamine-hydrolyzing]
Cc07_g16690	GSCOC_T00037530001	2.21065563158887	Hypothetical protein
Cc04_g05290	GSCOC_T00022277001	2.20613311527678	Putative uncharacterized protein
Cc02_g23650	GSCOC_T00015067001	2.2033107359745	Putative F-box protein At3g07870
Cc04_g03730	GSCOC_T00022071001	2.20035425431211	Pleiotropic drug resistance protein 1
Cc06_g02040	GSCOC_T00023444001	2.19782865258446	Probable glutathione S-transferase
Cc02_g11040	GSCOC_T00029463001	2.19548327611314	Transmembrane amino acid transporter family protein
Cc05_g09440	GSCOC_T00021585001	2.19520993182002	Mitogen-activated protein kinase 10
Cc10_g15730	GSCOC_T00033766001	2.18596387006519	Putative Probable mitochondrial 2-oxoglutarate/malate carrier protein
Cc08_g09670	GSCOC_T00026913001	2.18415795506255	Putative Mitogen-activated protein kinase kinase kinase 1
Cc06_g07430	GSCOC_T00031261001	2.18129415522353	Putative unknown protein; Has 1807 Blast hits to 1807 proteins in 277 species
Cc02_g18280	GSCOC_T00014367001	2.17265274841949	unknown protein; FUNCTIONS IN
Cc11_g00330	GSCOC_T00019466001	2.16721055085338	Alpha-galactosidase
Cc05_g03140	GSCOC_T00033506001	2.16698890061974	Nitrate transporter 1.3
Cc07_g17550	GSCOC_T00008838001	2.1661918047299	Putative endonuclease or glycosyl hydrolase
Cc10_g14280	GSCOC_T00012018001	2.16297258725579	Protein of unknown function (DUF300)
Cc03_g09660	GSCOC_T00030952001	2.16231183044821	Ras-related protein RABA5c
Cc06_g02030	GSCOC_T00023443001	2.14939014033465	Glutathione S-transferase U8
Cc09_g04370	GSCOC_T00017434001	2.14670927987641	Putative RING/U-box superfamily protein
Cc04_g04520	GSCOC_T00022177001	2.14412133621039	BED zinc finger ;hAT family dimerisation domain
Cc10_g07620	GSCOC_T00034499001	2.12947490343601	Putative pre-mRNA-processing protein 40A
Cc09_g03050	GSCOC_T00017596001	2.12775097144073	Putative Exosome complex component CSL4
Cc05_g14210	GSCOC_T00038849001	2.12440808921265	Putative Glucan endo-1,3-beta-glucosidase 13
Cc02_g15920	GSCOC_T00014059001	2.12357643233618	Probable LRR receptor-like serine/threonine-protein kinase At1g07650
Cc03_g02380	GSCOC_T00025880001	2.12173006132457	Inactive beta-amylase 9
Cc06_g11140	GSCOC_T00041693001	2.11827012180759	Putative Graves disease carrier protein
Cc11_g09540	GSCOC_T00032705001	2.11824995007692	Putative B-box type zinc finger protein with CCT domain
Cc11_g16360	GSCOC_T00038174001	2.11722876984927	Heat shock protein, putative
Cc01_g07640	GSCOC_T00015431001	2.11325527335851	Transcription factor LHW
Cc10_g00770	GSCOC_T00024536001	2.09855361431817	Probable serine/threonine-protein kinase At4g35230
Cc10_g00740	GSCOC_T00024532001	2.09450509823303	unknown protein; INVOLVED IN
Cc00_g13770	GSCOC_T00013300001	2.0934733412135	Alpha-aminoadipic semialdehyde synthase
Cc09_g00910	GSCOC_T00017883001	2.09078355119958	Fumarylacetoacetase
Cc02_g04570	GSCOC_T00020374001	2.0904388506675	Hexose carrier protein HEX6
Cc08_g16060	GSCOC_T00035555001	2.08341849769491	Putative RING-H2 finger protein ATL21A
Cc01_g10440	GSCOC_T00024140001	2.08105757456226	Serine carboxypeptidase-like 48
Cc05_g04450	GSCOC_T00031671001	2.08103262308782	Putative late blight resistance protein homolog R1B-16
Cc06_g20150	GSCOC_T00022923001	2.07384226064592	Calmodulin-interacting protein 111
Cc06_g12280	GSCOC_T00041555001	2.07332967451632	Putative Protein of unknown function (DUF1677)
Cc09_g04300	GSCOC_T00017443001	2.06778154139145	NADP-dependent alkenal double bond reductase P2
Cc08_g12660	GSCOC_T00030447001	2.06101382913278	unknown protein; FUNCTIONS IN
Cc03_g04350	GSCOC_T00026147001	2.06048759808795	Meiotic recombination protein DMC1 homolog
Cc01_g06680	GSCOC_T00030066001	2.05921268577798	Protein kinase APK1A, chloroplastic
Cc02_g13370	GSCOC_T00029167001	2.05516240495541	Callose synthase 11
Cc01_g18440	GSCOC_T00016205001	2.05173806990057	Tetratricopeptide repeat (TPR)-like superfamily protein
Cc01_g19860	GSCOC_T00016003001	2.04870591626628	oxidoreductase, 2OG-Fe(II) oxygenase family protein
Cc02_g03290	GSCOC_T00020206001	2.04165510234432	RHOMBOID-like 2
Cc08_g01680	GSCOC_T00038347001	2.0331366790777	unknown protein; FUNCTIONS IN
Cc00_g17430	GSCOC_T00013477001	2.0326086480042	Isoflavone reductase homolog P3
Cc10_g01580	GSCOC_T00024638001	2.03241140279125	Putative uncharacterized protein
Cc05_g11460	GSCOC_T00021312001	2.03185294766015	sodium/calcium exchanger family protein / calcium-binding EF hand family protein
Cc06_g11830	GSCOC_T00041611001	2.03142848657405	Threonine synthase 1, chloroplastic
Cc07_g05250	GSCOC_T00039791001	2.00794826730173	Hypothetical protein
Cc06_g22380	GSCOC_T00017200001	2.0006131170038	Putative F-box protein At5g07610
Cc04_g17190	GSCOC_T00035856001	1.99627731723348	Putative Aldose 1-epimerase
Cc02_g10760	GSCOC_T00029494001	1.99542761689399	Major facilitator superfamily protein
Cc08_g15560	GSCOC_T00035493001	1.99234535053152	Cation/H( ) antiporter 17
Cc06_g18910	GSCOC_T00028930001	1.98502468894782	Plant protein 1589 of unknown function
Cc02_g00270	GSCOC_T00019803001	1.97855860722549	Putative ATPase family AAA domain-containing protein 3-A
Cc06_g08270	GSCOC_T00031152001	1.97416867994469	Putative Umecyanin
Cc10_g06310	GSCOC_T00034677001	1.97047135052407	Uncharacterized aarF domain-containing protein kinase At1g71810, chloroplastic
Cc11_g13140	GSCOC_T00032220001	1.96939371954587	Putative Probable ran guanine nucleotide release factor
Cc10_g07360	GSCOC_T00034533001	1.96417006249075	Putative uncharacterized protein
Cc07_g03420	GSCOC_T00039571001	1.96305828652151	Putative Vacuolar amino acid transporter 1
Cc04_g05310	GSCOC_T00022280001	1.96036657561709	Putative unknown protein; BEST Arabidopsis thaliana protein match is
Cc08_g04350	GSCOC_T00034257001	1.96015136149189	Putative UDP-glycosyltransferase 73C7
Cc03_g09480	GSCOC_T00030926001	1.95744457165272	Hypothetical protein
Cc07_g05180	GSCOC_T00039783001	1.95651057082073	Putative Uncharacterized membrane protein YOL092W
Cc04_g10490	GSCOC_T00042601001	1.95612779627579	Putative uncharacterized protein
Cc02_g11030	GSCOC_T00029464001	1.95460824236012	Transmembrane amino acid transporter family protein
Cc04_g15740	GSCOC_T00042352001	1.95447838721234	Probable peptide/nitrate transporter At5g62680
Cc02_g05970	GSCOC_T00039118001	1.95039416142911	Putative Dehydration-responsive element-binding protein 2C
Cc03_g02410	GSCOC_T00025885001	1.94036156233582	Sodium/hydrogen exchanger 2
Cc10_g01990	GSCOC_T00024694001	1.93453934537983	Histone H3.3
Cc06_g17240	GSCOC_T00036358001	1.93400032792966	Putative Uncharacterized conserved protein (DUF2215)
Cc03_g04380	GSCOC_T00026152001	1.92848971497825	ATP sulfurylase 1, chloroplastic
Cc02_g33140	GSCOC_T00015328001	1.91611473736862	Probable xyloglucan endotransglucosylase/hydrolase 1
Cc01_g13580	GSCOC_T00028328001	1.9123158239584	17.5 kDa class I heat shock protein
Cc10_g00690	GSCOC_T00024526001	1.90874756125957	Putative Pre-rRNA-processing protein TSR1 homolog
Cc07_g01520	GSCOC_T00039324001	1.90874109919021	beta-1,4-N-acetylglucosaminyltransferase family protein
Cc05_g16500	GSCOC_T00038551001	1.9078655133257	Metal tolerance protein 10
Cc11_g04190	GSCOC_T00001330001	1.90521988309776	Putative polyol transporter 1
Cc06_g09330	GSCOC_T00041928001	1.90358901184183	Predicted protein
Cc01_g08010	GSCOC_T00015487001	1.89768645492639	Putative Probable carboxylesterase 15
Cc07_g00500	GSCOC_T00019122001	1.89627869895162	Lysine histidine transporter 1
Cc02_g37320	GSCOC_T00028008001	1.89101115806923	F-box protein PP2-A13
Cc02_g34210	GSCOC_T00000657001	1.88909524496936	Pre-mRNA-splicing factor SF2
Cc08_g14720	GSCOC_T00030189001	1.88793865185966	Putative bromo-adjacent homology (BAH) domain-containing protein
Cc05_g11890	GSCOC_T00021257001	1.88673671933902	MATE efflux family protein ALF5
Cc00_g21200	GSCOC_T00009601001	1.88376090022994	Plant neutral invertase family protein
Cc05_g03920	GSCOC_T00017313001	1.88261137680265	Uncharacterized protein
Cc01_g12510	GSCOC_T00028188001	1.87790697063136	ACT domain-containing protein
Cc08_g00140	GSCOC_T00005569001	1.87525856585348	Hypothetical protein
Cc06_g05350	GSCOC_T00043081001	1.86965444256851	Putative UPF0481 protein At3g47200
Cc07_g05920	GSCOC_T00039880001	1.8695094970505	Putative Uncharacterized membrane protein At3g27390
Cc09_g01060	GSCOC_T00017862001	1.86911235926377	Protein of unknown function (DUF3537)
Cc04_g07130	GSCOC_T00022518001	1.86865211029417	LOB domain-containing protein 41
Cc04_g04670	GSCOC_T00022199001	1.86859226622539	Protein TOPLESS
Cc05_g01990	GSCOC_T00040825001	1.86668663453704	Zinc finger protein CONSTANS-LIKE 9
Cc05_g11280	GSCOC_T00021336001	1.86456076334282	Putative Protein DJ-1
Cc02_g19520	GSCOC_T00014520001	1.86373242729732	transducin family protein / WD-40 repeat family protein
Cc11_g14550	GSCOC_T00032044001	1.85246653225088	Aldehyde dehydrogenase family 2 member B7, mitochondrial
Cc00_g13810	GSCOC_T00007198001	1.85216769062034	Putative Long-chain-alcohol O-fatty-acyltransferase
Cc06_g08960	GSCOC_T00041982001	1.85171130603597	GTP-binding nuclear protein Ran-3
Cc04_g06710	GSCOC_T00022466001	1.84962886583772	Putative MATE efflux family protein DTX1
Cc02_g32950	GSCOC_T00016726001	1.84798265237822	Putative Bifunctional 3-dehydroquinate dehydratase/shikimate dehydrogenase, chloroplastic
Cc02_g13120	GSCOC_T00029198001	1.84732857948987	Putative CBS domain-containing protein CBSX5
Cc04_g04440	GSCOC_T00022169001	1.84362072393592	Protein kinase superfamily protein
Cc02_g18020	GSCOC_T00014335001	1.84301953901489	Putative Plastid division protein PDV2
Cc04_g15150	GSCOC_T00002599001	1.84227976268619	Putative NEP1-interacting protein-like 2
Cc06_g08720	GSCOC_T00031093001	1.84051754062945	unknown protein; Has 54 Blast hits to 54 proteins in 26 species
Cc03_g09610	GSCOC_T00030945001	1.83883212845168	Putative UDP-glycosyltransferase 76E11
Cc06_g03950	GSCOC_T00023696001	1.83172658703748	Auxin response factor 18
Cc04_g10510	GSCOC_T00042603001	1.82583419389218	Putative Nuclear pore complex protein Nup155
Cc04_g03800	GSCOC_T00022087001	1.82246657591726	Plastidic ATP/ADP-transporter
Cc08_g00680	GSCOC_T00038483001	1.82054144453333	Hypothetical protein
Cc01_g21460	GSCOC_T00004978001	1.82007958346971	Calcium-dependent phosphotriesterase superfamily protein
Cc09_g07450	GSCOC_T00036255001	1.8197762508847	Reticuline oxidase-like protein
Cc08_g10050	GSCOC_T00026964001	1.81874541129481	BEST Arabidopsis thaliana protein match is
Cc06_g09930	GSCOC_T00041850001	1.81795476088206	Putative RNA-binding protein-related
Cc04_g14700	GSCOC_T00040731001	1.81174715763304	pheophytinase
Cc10_g05550	GSCOC_T00034793001	1.80922085943439	Putative Arginine N-methyltransferase 2
Cc10_g03070	GSCOC_T00024826001	1.80786918853268	Protein kinase superfamily protein
Cc10_g03100	GSCOC_T00024830001	1.80663181317478	unknown protein; Has 219 Blast hits to 202 proteins in 78 species
Cc04_g06140	GSCOC_T00022395001	1.80596697592239	Putative Uncharacterized protein At3g17950
Cc06_g06180	GSCOC_T00031416001	1.79999143033753	Putative Uncharacterized protein RP120
Cc02_g14810	GSCOC_T00013902001	1.79389084339064	Putative uncharacterized protein
Cc06_g11120	GSCOC_T00041695001	1.78925098932677	Pollen-specific protein SF21
Cc10_g05500	GSCOC_T00034799001	1.78149680956376	NAD(P)-binding Rossmann-fold superfamily protein
Cc04_g04820	GSCOC_T00022221001	1.78141774591262	unknown protein; BEST Arabidopsis thaliana protein match is
Cc02_g04680	GSCOC_T00020387001	1.78101736622615	Putative Uncharacterized protein At3g06530
Cc11_g07690	GSCOC_T00018017001	1.78090620663991	Adagio protein 3
Cc08_g14230	GSCOC_T00030252001	1.77666380717636	Thaumatin-like protein
Cc07_g12920	GSCOC_T00036814001	1.77611142416076	Putative Universal stress protein A-like protein
Cc02_g37480	GSCOC_T00027984001	1.77552469931896	Protein of unknown function (DUF616)
Cc01_g16180	GSCOC_T00016472001	1.7748345586849	Hypothetical protein
Cc00_g28260	GSCOC_T00002218001	1.77403391906334	Ent-kaurene oxidase, chloroplastic
Cc01_g12520	GSCOC_T00028190001	1.77330672576077	Histone H4
Cc00_g34980	GSCOC_T00013334001	1.77131362816476	UDP-glucose flavonoid 3-O-glucosyltransferase 6
Cc00_g22270	GSCOC_T00007436001	1.77118000741424	Putative unknown protein; BEST Arabidopsis thaliana protein match is
Cc04_g02430	GSCOC_T00021915001	1.77059070897511	Putative DNA repair protein RadA homolog
Cc07_g19320	GSCOC_T00018603001	1.77002621000393	Putative Probable E3 ubiquitin-protein ligase HERC4
Cc07_g07860	GSCOC_T00040148001	1.7678805345733	Heat shock 70 kDa protein, mitochondrial
Cc06_g05890	GSCOC_T00043157001	1.76459660655977	Putative unknown protein; FUNCTIONS IN
Cc01_g19930	GSCOC_T00015995001	1.7613382400019	Receptor-like cytosolic serine/threonine-protein kinase RBK2
Cc02_g21470	GSCOC_T00014789001	1.76073924197681	Outer envelope protein 64, mitochondrial
Cc11_g03150	GSCOC_T00025459001	1.75971422090358	Putative DNA-directed RNA polymerase I subunit RPA2
Cc08_g14800	GSCOC_T00035389001	1.755383329887	GMP synthase [glutamine-hydrolyzing]
Cc01_g04330	GSCOC_T00004454001	1.75308684397582	Putative Transducin/WD40 repeat-like superfamily protein
Cc07_g08960	GSCOC_T00040288001	1.75078799462363	AWPM-19-like family protein
Cc02_g32230	GSCOC_T00012957001	1.75040304548311	Sodium/hydrogen exchanger 2
Cc10_g03930	GSCOC_T00034998001	1.74955587692575	Uncharacterized protein
Cc06_g01960	GSCOC_T00023436001	1.74760025328394	17.5 kDa class I heat shock protein
Cc07_g03090	GSCOC_T00039524001	1.74140483553919	Putative F-box/WD repeat-containing protein 7
Cc05_g01700	GSCOC_T00015744001	1.73994025100267	Putative methyltransferase NSUN6
Cc08_g11020	GSCOC_T00027092001	1.73756245635442	Putative Puromycin-sensitive aminopeptidase
Cc07_g01960	GSCOC_T00039375001	1.73067330910118	Putative unknown protein; BEST Arabidopsis thaliana protein match is
Cc03_g04020	GSCOC_T00026105001	1.72588009447017	Putative Non-specific lipid-transfer protein-like protein At2g13820
Cc08_g01530	GSCOC_T00038372001	1.72551624632638	Beta-amylase 3, chloroplastic
Cc10_g01180	GSCOC_T00024584001	1.72490594910039	Calcium-dependent protein kinase 29
Cc08_g00430	GSCOC_T00038523001	1.72439314877163	Putative Extended synaptotagmin-3
Cc11_g17090	GSCOC_T00038265001	1.72368505938987	unknown protein; Has 44 Blast hits to 44 proteins in 12 species
Cc02_g15910	GSCOC_T00014058001	1.72295341538746	Probable LRR receptor-like serine/threonine-protein kinase RFK1
Cc04_g11680	GSCOC_T00037371001	1.72148289939432	Putative Octicosapeptide/Phox/Bem1p family protein
Cc05_g11510	GSCOC_T00021307001	1.71956356268077	Homogentisate 1,2-dioxygenase
Cc05_g08620	GSCOC_T00016889001	1.71643125212731	Hypothetical protein
Cc00_g18750	GSCOC_T00008462001	1.70849022995635	Hypothetical protein
Cc07_g05210	GSCOC_T00039787001	1.70781101340962	Putative protein kinase family protein / peptidoglycan-binding LysM domain-containing protein
Cc02_g12490	GSCOC_T00029275001	1.706792298741	Anaphase-promoting complex subunit 4
Cc06_g13640	GSCOC_T00041367001	1.70456221453275	Xylose isomerase
Cc07_g14190	GSCOC_T00036646001	1.699616125955	Putative GPI ethanolamine phosphate transferase 2
Cc07_g05800	GSCOC_T00039862001	1.69160647848727	Putative Patatin group A-3
Cc02_g07430	GSCOC_T00029942001	1.68929089127578	Protein phosphatase 2C 37
Cc04_g09530	GSCOC_T00022844001	1.68615079115462	Putative RNA-binding (RRM/RBD/RNP motifs) family protein
Cc07_g03670	GSCOC_T00039611001	1.68582658036087	Putative uncharacterized protein
Cc09_g10830	GSCOC_T00040997001	1.68422563961931	Putative Nucleolar complex protein 4 homolog
Cc09_g05510	GSCOC_T00013393001	1.6778727355032	FUNCTIONS IN
Cc04_g05690	GSCOC_T00022334001	1.67745443395373	Putative Sucrose nonfermenting 4-like protein
Cc02_g03070	GSCOC_T00020177001	1.67745303900697	Cleavage and polyadenylation specificity factor subunit 5
Cc09_g01320	GSCOC_T00017827001	1.6773447376705	Transcription factor jumonji (jmjC) domain-containing protein
Cc08_g14340	GSCOC_T00030236001	1.67464860835494	tetraspanin10
Cc07_g03470	GSCOC_T00039578001	1.67368573912905	Putative Dof zinc finger protein DOF5.2
Cc01_g12500	GSCOC_T00028187001	1.66548752832708	unknown protein; FUNCTIONS IN
Cc00_g19070	GSCOC_T00000778001	1.66010957141136	Aldehyde dehydrogenase family 7 member B4
Cc02_g27050	GSCOC_T00025022001	1.65945739987388	Hypothetical protein
Cc11_g04600	GSCOC_T00004818001	1.65675705647127	unknown protein; INVOLVED IN
Cc02_g06120	GSCOC_T00039137001	1.65350795199578	Putative Probable LRR receptor-like serine/threonine-protein kinase MRH1
Cc10_g04940	GSCOC_T00034874001	1.65336017086342	Putative Transcription factor MYB44
Cc05_g00550	GSCOC_T00017093001	1.65327083554637	Predicted protein
Cc08_g15320	GSCOC_T00035461001	1.65103905957373	Hypothetical protein
Cc11_g16050	GSCOC_T00038134001	1.64974442136212	Cellulase (glycosyl hydrolase family 5) protein
Cc06_g07300	GSCOC_T00031281001	1.64608327409041	Putative Predicted protein
Cc05_g13310	GSCOC_T00021078001	1.64595378223251	Thiamine thiazole synthase, chloroplastic
Cc08_g11880	GSCOC_T00030561001	1.64359929611958	Ubiquitin carboxyl-terminal hydrolase isozyme L3
Cc06_g11740	GSCOC_T00041620001	1.64220599152481	Putative uncharacterized protein
Cc10_g03940	GSCOC_T00034997001	1.64027782904837	Putative Protein of unknown function (DUF1645)
Cc02_g19570	GSCOC_T00014525001	1.6398291279677	Putative Uncharacterized protein C757.02c
Cc10_g03110	GSCOC_T00024832001	1.63368601363646	C2H2-like zinc finger protein
Cc02_g09270	GSCOC_T00029679001	1.63352629153288	Mitochondrial glycoprotein family protein
Cc04_g05210	GSCOC_T00022267001	1.63212882656292	Chaperone protein dnaJ 8, chloroplastic
Cc06_g14550	GSCOC_T00041240001	1.63147908896975	DNA-directed RNA polymerase 3, chloroplastic
Cc06_g10600	GSCOC_T00041757001	1.62998091119001	Putative uncharacterized protein
Cc03_g02590	GSCOC_T00025913001	1.62843093455216	Sugar transporter ERD6-like 16
Cc01_g12080	GSCOC_T00028129001	1.62445305514846	Receptor-like protein kinase HERK 1
Cc06_g09060	GSCOC_T00041970001	1.62258327818666	Probable histone H2A variant 3
Cc11_g10490	GSCOC_T00032570001	1.62134417970922	phytochrome and flowering time regulatory protein (PFT1)
Cc05_g08270	GSCOC_T00016845001	1.62125093127529	Putative uncharacterized protein
Cc00_g11080	GSCOC_T00000147001	1.61879455244978	Secologanin synthase
Cc02_g29380	GSCOC_T00018358001	1.61868303047931	transcription coactivators
Cc08_g06690	GSCOC_T00005857001	1.61716917653145	Dynamin-related protein 3A
Cc03_g04920	GSCOC_T00026223001	1.61680313013773	DNA repair protein XRCC4
Cc06_g12150	GSCOC_T00041571001	1.61575832468156	Putative unknown protein; BEST Arabidopsis thaliana protein match is
Cc02_g02420	GSCOC_T00020097001	1.6156664298956	unknown protein; BEST Arabidopsis thaliana protein match is
Cc10_g09690	GSCOC_T00031512001	1.61301487092877	Patellin 1
Cc01_g10560	GSCOC_T00024155001	1.60777433582763	phosphatidate cytidylyltransferase family protein
Cc00_g05550	GSCOC_T00009828001	1.60728054018891	Putative DDT domain-containing protein
Cc10_g09470	GSCOC_T00031539001	1.60478976742354	Putative DNA mismatch repair protein Mlh1
Cc00_g10200	GSCOC_T00003160001	1.60288155722365	CRT (chloroquine-resistance transporter)-like transporter 3
Cc01_g10540	GSCOC_T00024152001	1.60080636422501	ABC transporter F family member 1
Cc04_g06240	GSCOC_T00022407001	1.60033870521379	Putative zinc finger (Ran-binding) family protein
Cc02_g02410	GSCOC_T00020096001	1.59939218763049	conserved peptide upstream open reading frame 14
Cc09_g00820	GSCOC_T00017899001	1.59915949566672	Putative F-box protein CPR30
Cc02_g11180	GSCOC_T00029445001	1.59819857578834	Putative Protein DGCR14 homolog
Cc08_g13230	GSCOC_T00030367001	1.59806918916234	Putative transferase CAF17, mitochondrial
Cc02_g09110	GSCOC_T00029702001	1.59717228264269	Putative Vacuolar protein sorting-associated protein 72 homolog
Cc02_g12560	GSCOC_T00029268001	1.5936471977048	Putative Probable ADP-ribosylation factor GTPase-activating protein AGD5
Cc02_g27440	GSCOC_T00025074001	1.59328601948641	Putative Chaperone protein dnaJ 1, mitochondrial
Cc00_g08410	GSCOC_T00009640001	1.5923406780605	Galactoside 2-alpha-L-fucosyltransferase
Cc03_g03060	GSCOC_T00025981001	1.59010518350329	Putative Probable serine incorporator
Cc10_g15870	GSCOC_T00033789001	1.58621116994675	Mechanosensitive ion channel protein 3, chloroplastic
Cc07_g19270	GSCOC_T00018614001	1.58287381646778	NAD(P)H-hydrate epimerase
Cc06_g02550	GSCOC_T00023512001	1.58270080514287	RHOMBOID-like 1
Cc08_g05330	GSCOC_T00024288001	1.57736604855845	Alternative oxidase 3, mitochondrial
Cc06_g10850	GSCOC_T00041727001	1.57630732702281	Zinc finger CCCH domain-containing protein 49
Cc03_g03960	GSCOC_T00026097001	1.57625477074388	Putative Protein of unknown function (DUF581)
Cc08_g13090	GSCOC_T00030385001	1.57599846207118	Putative Bifunctional inhibitor/lipid-transfer protein/seed storage 2S albumin superfamily protein
Cc07_g03060	GSCOC_T00039520001	1.57489919844417	FACT complex subunit SSRP1
Cc07_g06140	GSCOC_T00039910001	1.57273044568503	F-box protein At5g67140

## Sheet: SWD_vs_WW_eCO2_down
Gene ID	TID	Log2FC	Protein Name
Cc02_g17500	GSCOC_T00014268001	-12.2021180447988	Hypothetical protein
Cc00_g17790	GSCOC_T00004701001	-9.18393257530054	Hypothetical protein
Cc04_g16340	GSCOC_T00035723001	-8.79387754543024	Expansin-A15
Cc06_g06800	GSCOC_T00031339001	-8.54817306561574	Hypothetical protein
Cc08_g12110	GSCOC_T00030526001	-8.48404201792043	Cytochrome P450 71D10
Cc01_g08480	GSCOC_T00006217001	-8.40203646561234	Putative Aspartic proteinase nepenthesin-1
Cc05_g11950	GSCOC_T00021251001	-8.2925873050931	VQ motif-containing protein
Cc03_g14440	GSCOC_T00026661001	-7.94621867964168	unknown protein; BEST Arabidopsis thaliana protein match is
Cc04_g04250	GSCOC_T00022147001	-7.92593848980215	Ethylene-responsive transcription factor WIN1
Cc02_g12150	GSCOC_T00029326001	-7.89032001016204	Calcium-binding protein PBP1
Cc07_g13390	GSCOC_T00036742001	-7.76446723175215	Glucan endo-1,3-beta-glucosidase 2
Cc03_g01560	GSCOC_T00025771001	-7.69854528013717	Putative Epoxide hydrolase 2
Cc01_g19340	GSCOC_T00016071001	-7.619625900471	Putative ovate family protein 16
Cc04_g12440	GSCOC_T00005304001	-7.59821211675056	Protein of Unknown Function (DUF239)
Cc11_g13960	GSCOC_T00032120001	-7.59487944434221	Putative ARM repeat superfamily protein
Cc02_g09840	GSCOC_T00029602001	-7.58214797441014	Putative Major facilitator superfamily protein
Cc07_g06890	GSCOC_T00040016001	-7.55800792858271	Scarecrow-like protein 32
Cc07_g13530	GSCOC_T00036725001	-7.39317340093056	Protein RSI-1
Cc11_g01930	GSCOC_T00019491001	-7.3004962174388	Ran BP2/NZF zinc finger-like superfamily protein
Cc11_g14750	GSCOC_T00032014001	-7.26472159394398	Putative Glucan endo-1,3-beta-glucosidase 13
Cc07_g16350	GSCOC_T00037571001	-7.25768220680369	Putative Cytochrome P450 86B1
Cc08_g01750	GSCOC_T00038339001	-7.13306689539211	Cytochrome c oxidase subunit 6b-3
Cc05_g08560	GSCOC_T00016880001	-6.94235814484844	Brassinosteroid-regulated protein BRU1
Cc06_g16470	GSCOC_T00030688001	-6.55853381413901	Probably inactive leucine-rich repeat receptor-like protein kinase At5g06940
Cc10_g11960	GSCOC_T00031875001	-6.55391555502588	unknown protein; FUNCTIONS IN
Cc01_g14170	GSCOC_T00028412001	-6.45344155749016	Vacuolar cation/proton exchanger 1
Cc07_g14500	GSCOC_T00036608001	-6.38261548653962	Putative Transcription factor bHLH96
Cc07_g09400	GSCOC_T00037248001	-6.29027097717678	Sulfite exporter TauE/SafE family protein
Cc06_g08340	GSCOC_T00031144001	-6.24806530913836	Putative Tetratricopeptide repeat (TPR)-like superfamily protein
Cc02_g03720	GSCOC_T00020265001	-6.15779142820641	Alpha-L-fucosidase 1
Cc11_g08360	GSCOC_T00032886001	-6.13113224501048	Putative MLP-like protein 28
Cc03_g01760	GSCOC_T00025801001	-6.03725565945259	unknown protein; Has 91 Blast hits to 91 proteins in 12 species
Cc10_g14430	GSCOC_T00006176001	-5.99991525747081	Cupredoxin superfamily protein
Cc06_g12080	GSCOC_T00041578001	-5.84991872868695	Auxin-binding protein ABP20
Cc01_g11410	GSCOC_T00024270001	-5.83299319774353	Auxin response factor 4
Cc07_g10480	GSCOC_T00037111001	-5.81295234625977	Lactoylglutathione lyase / glyoxalase I family protein
Cc00_g26240	GSCOC_T00012616001	-5.76737995229108	Putative Probable peptide transporter At1g52190
Cc08_g08800	GSCOC_T00017212001	-5.72715698771401	Putative BURP domain-containing protein 5
Cc08_g01760	GSCOC_T00038338001	-5.70258815651803	Putative invertase inhibitor
Cc08_g13370	GSCOC_T00030352001	-5.66394496958843	Predicted protein (Fragment)
Cc03_g09600	GSCOC_T00030944001	-5.61914853270464	Putative Transcription factor bHLH77
Cc01_g16260	GSCOC_T00016463001	-5.5596325992265	Hypothetical protein
Cc02_g00220	GSCOC_T00019798001	-5.55558650786082	Syntaxin-22
Cc02_g09480	GSCOC_T00029651001	-5.55536416899209	Putative Double Clp-N motif-containing P-loop nucleoside triphosphate hydrolases superfamily protein
Cc07_g00260	GSCOC_T00019092001	-5.52918187893218	Chlorophyll a-b binding protein 13, chloroplastic
Cc01_g09730	GSCOC_T00024037001	-5.5247918616808	Uncharacterized protein At5g22580
Cc03_g02370	GSCOC_T00025879001	-5.45011195779208	Hypothetical protein
Cc01_g10180	GSCOC_T00024100001	-5.40038757569964	Hypothetical protein
Cc11_g16080	GSCOC_T00038139001	-5.38628003907191	Putative CONTAINS InterPro DOMAIN/s
Cc08_g17120	GSCOC_T00035698001	-5.36313000024599	Probable aquaporin NIP5-1
Cc05_g09650	GSCOC_T00021556001	-5.33983924455699	Chlorophyll a-b binding protein 1, chloroplastic
Cc09_g06490	GSCOC_T00005100001	-5.33684112099663	Delta(24)-sterol reductase
Cc04_g00680	GSCOC_T00021691001	-5.31078571424169	Pectinesterase/pectinesterase inhibitor U1
Cc11_g08330	GSCOC_T00032889001	-5.27632708315263	phosphoglucomutase, putative / glucose phosphomutase, putative
Cc10_g04500	GSCOC_T00034926001	-5.26917640588271	Putative Remorin family protein
Cc00_g31440	GSCOC_T00006470001	-5.20442141959417	Wound-responsive family protein
Cc08_g02950	GSCOC_T00037797001	-5.19759013330906	Putative Transcription factor bHLH94
Cc06_g00560	GSCOC_T00023237001	-5.15337354394186	Putative uncharacterized protein
Cc02_g02310	GSCOC_T00020082001	-5.15237912532017	Putative uncharacterized protein
Cc07_g13130	GSCOC_T00036783001	-5.11851270285033	Probable receptor protein kinase TMK1
Cc02_g39730	GSCOC_T00027676001	-5.11134459601171	Ras-related protein RABA3
Cc01_g16150	GSCOC_T00016475001	-5.08082564088561	Putative Bifunctional inhibitor/lipid-transfer protein/seed storage 2S albumin superfamily protein
Cc04_g15520	GSCOC_T00042324001	-5.07812190256796	Putative Mitochondrial outer membrane protein porin of 36 kDa
Cc10_g04590	GSCOC_T00034917001	-5.05365727860251	Putative Subtilisin-like protease
Cc06_g09480	GSCOC_T00041909001	-5.03620778121623	Predicted protein (Fragment)
Cc07_g06040	GSCOC_T00039896001	-5.02976435644614	Putative alpha/beta-Hydrolases superfamily protein
Cc11_g02980	GSCOC_T00025493001	-5.02452847843526	Interactor of constitutive active ROPs 2, chloroplastic
Cc08_g11520	GSCOC_T00027156001	-5.02036151753054	Putative HXXXD-type acyl-transferase family protein
Cc06_g19180	GSCOC_T00028970001	-5.00448105664448	Putative unknown protein; Has 26 Blast hits to 26 proteins in 11 species
Cc01_g19080	GSCOC_T00016105001	-4.9896987707478	Putative Chlorophyllase-1
Cc11_g09240	GSCOC_T00032763001	-4.97424647705173	MATE efflux family protein DTX1
Cc11_g13310	GSCOC_T00032199001	-4.95928395627424	Homeobox-leucine zipper protein ATHB-13
Cc07_g04510	GSCOC_T00039707001	-4.93081596120745	Hypothetical protein
Cc05_g00750	GSCOC_T00013165001	-4.93026235385579	Putative Acidic endochitinase
Cc11_g04910	GSCOC_T00042937001	-4.89299777203961	Probable pectinesterase/pectinesterase inhibitor 40
Cc11_g15340	GSCOC_T00038044001	-4.89057031242851	Putative Plant protein 1589 of unknown function
Cc00_g17860	GSCOC_T00008903001	-4.84855136437805	Probable polygalacturonase
Cc10_g04190	GSCOC_T00034966001	-4.81104781581101	Chlorophyll a-b binding protein P4, chloroplastic
Cc05_g06670	GSCOC_T00042170001	-4.8084975343426	Putative unknown protein; BEST Arabidopsis thaliana protein match is
Cc08_g04410	GSCOC_T00034266001	-4.79788857916232	Hypothetical protein
Cc04_g09480	GSCOC_T00022837001	-4.77677967605331	CASP-like protein VIT_17s0000g00560
Cc01_g21160	GSCOC_T00005016001	-4.75489254936268	Kinesin-4
Cc03_g14540	GSCOC_T00026671001	-4.75405007960729	Predicted protein
Cc11_g05230	GSCOC_T00020465001	-4.75402307218877	Putative unknown protein; BEST Arabidopsis thaliana protein match is
Cc07_g03490	GSCOC_T00039583001	-4.7369940490361	Expansin-A15
Cc02_g19090	GSCOC_T00014473001	-4.72633745064588	Uncharacterized protein At4g06744
Cc02_g21770	GSCOC_T00014823001	-4.71762379083819	Putative uncharacterized protein
Cc10_g07380	GSCOC_T00034531001	-4.70353248394378	Putative unknown protein; FUNCTIONS IN
Cc08_g02370	GSCOC_T00037708001	-4.70175928796076	Putative Deacetylvindoline O-acetyltransferase
Cc01_g16160	GSCOC_T00016474001	-4.67461573914616	Putative unknown protein; BEST Arabidopsis thaliana protein match is
Cc02_g15530	GSCOC_T00014005001	-4.67298908444029	Putative uncharacterized protein
Cc02_g32500	GSCOC_T00001237001	-4.63400494027901	Putative Sugar transporter ERD6-like 5
Cc08_g16380	GSCOC_T00035596001	-4.58353534016891	Putative Protein ABIL3
Cc00_g05850	GSCOC_T00012079001	-4.57399541112642	Acidic endochitinase
Cc06_g06330	GSCOC_T00031396001	-4.52617076184994	Putative ovate family protein 13
Cc04_g07230	GSCOC_T00022533001	-4.52541351826006	Putative uncharacterized protein
Cc05_g02500	GSCOC_T00020945001	-4.5225626273419	GDSL esterase/lipase At2g04570
Cc04_g08320	GSCOC_T00022688001	-4.51605876751066	Putative Subtilisin-like protease
Cc04_g14900	GSCOC_T00040775001	-4.51044065544086	Putative Uncharacterized protein At5g01610
Cc06_g01950	GSCOC_T00023434001	-4.5065142197151	Putative uncharacterized protein
Cc02_g17450	GSCOC_T00014261001	-4.49735254200304	Uncharacterized protein
Cc09_g00440	GSCOC_T00017950001	-4.49392982887832	Uncharacterized protein
Cc05_g11180	GSCOC_T00021348001	-4.48721957526108	Phosphoenolpyruvate carboxylase
Cc00_g06260	GSCOC_T00010080001	-4.4866709547413	Putative Hydroxycinnamoyl-Coenzyme A shikimate/quinate hydroxycinnamoyltransferase
Cc07_g07420	GSCOC_T00040091001	-4.48186184474301	Squalene monooxygenase
Cc07_g00190	GSCOC_T00019083001	-4.47832678282547	Pectate lyase
Cc08_g03030	GSCOC_T00037810001	-4.47730590728357	ABC transporter B family member 2
Cc02_g13480	GSCOC_T00029145001	-4.45870770279368	Putative arabinogalactan protein 30
Cc03_g04570	GSCOC_T00026182001	-4.43906645890949	3-ketoacyl-CoA synthase 17
Cc11_g12220	GSCOC_T00032345001	-4.43762374306741	Alpha-1,4 glucan phosphorylase L-2 isozyme, chloroplastic/amyloplastic
Cc02_g04130	GSCOC_T00020316001	-4.42891078581789	Putative 21 kDa protein
Cc09_g09090	GSCOC_T00023108001	-4.41655650725214	Putative Probable purine permease 10
Cc01_g09870	GSCOC_T00024057001	-4.41574946532972	Putative Hyoscyamine 6-dioxygenase
Cc00_g15670	GSCOC_T00008808001	-4.40073607095372	Putative Omega-hydroxypalmitate O-feruloyl transferase
Cc06_g23300	GSCOC_T00040592001	-4.39573857311549	Protein of unknown function (DUF620)
Cc04_g06540	GSCOC_T00022443001	-4.36219022708186	Putative Uncharacterized GPI-anchored protein At4g28100
Cc05_g09960	GSCOC_T00021519001	-4.34202387766629	CASP-like protein VIT_01s0010g01870
Cc11_g14290	GSCOC_T00032077001	-4.33623171512575	Cyclin-D1-1
Cc02_g09340	GSCOC_T00029665001	-4.32876297531557	Putative Cytosolic sulfotransferase 5
Cc11_g14930	GSCOC_T00001041001	-4.32849896183271	Probable peptide/nitrate transporter At5g13400
Cc11_g14400	GSCOC_T00032063001	-4.32416421671841	Putative Auxin-induced protein 5NG4
Cc05_g14940	GSCOC_T00038756001	-4.32066194457007	Fasciclin-like arabinogalactan protein 1
Cc10_g01110	GSCOC_T00024577001	-4.30910393361067	Putative Major facilitator superfamily protein
Cc00_g32030	GSCOC_T00008801001	-4.29373425916605	Chalcone and stilbene synthase family protein
Cc00_g02580	GSCOC_T00001684001	-4.28883251620826	Putative Glucan endo-1,3-beta-glucosidase-like protein 3
Cc01_g05180	GSCOC_T00011472001	-4.28659640756627	Omega-6 fatty acid desaturase, endoplasmic reticulum isozyme 2
Cc11_g08120	GSCOC_T00032919001	-4.28617443738827	Protein PLANT CADMIUM RESISTANCE 2
Cc08_g02440	GSCOC_T00037718001	-4.25793561108343	NAC domain containing protein 71
Cc06_g17450	GSCOC_T00036396001	-4.25641663633825	Putative Double Clp-N motif-containing P-loop nucleoside triphosphate hydrolases superfamily protein
Cc01_g17620	GSCOC_T00016300001	-4.24712711061609	Receptor-like serine/threonine-protein kinase ALE2
Cc11_g11290	GSCOC_T00032465001	-4.23782629466059	basic leucine-zipper 42
Cc08_g09400	GSCOC_T00017295001	-4.22513076062948	Aquaporin TIP4-1
Cc03_g15040	GSCOC_T00026761001	-4.22431380346651	Putative uncharacterized protein
Cc10_g12560	GSCOC_T00031972001	-4.21228315227302	Probable peptide/nitrate transporter At5g62680
Cc02_g17600	GSCOC_T00014280001	-4.19951218260781	Probable receptor-like serine/threonine-protein kinase At4g34500
Cc00_g19010	GSCOC_T00001295001	-4.18623563985603	Chalcone and stilbene synthase family protein
Cc07_g03750	GSCOC_T00039620001	-4.17451259539374	Lamin-like protein
Cc00_g35710	GSCOC_T00010453001	-4.17255013354687	Acidic endochitinase
Cc04_g02380	GSCOC_T00021909001	-4.17168171029479	GDSL esterase/lipase APG
Cc06_g01400	GSCOC_T00023358001	-4.16795650729114	Vacuolar cation/proton exchanger 1
Cc05_g02850	GSCOC_T00020872001	-4.15423257954841	Putative Glucan endo-1,3-beta-glucosidase 3
Cc08_g02490	GSCOC_T00037725001	-4.14444163402757	Protein LOL1
Cc10_g14810	GSCOC_T00033629001	-4.13614677665664	Putative Auxin-induced protein 5NG4
Cc03_g02760	GSCOC_T00025944001	-4.12876512247008	Peptide methionine sulfoxide reductase B3, chloroplastic
Cc02_g21280	GSCOC_T00014765001	-4.12482315496609	ABC transporter G family member 11
Cc11_g07400	GSCOC_T00018057001	-4.12384655846125	Protein of unknown function (DUF1295)
Cc07_g14220	GSCOC_T00036643001	-4.11563521910512	Putative hydroxyproline-rich glycoprotein family protein
Cc11_g05920	GSCOC_T00020568001	-4.11541660332487	Probable transmembrane ascorbate ferrireductase 3
Cc08_g05610	GSCOC_T00024342001	-4.11337321491669	Probable carotenoid cleavage dioxygenase 4, chloroplastic
Cc05_g01940	GSCOC_T00040844001	-4.08441015902788	Putative UDP-glucose flavonoid 3-O-glucosyltransferase 3
Cc06_g07710	GSCOC_T00031225001	-4.08031179232225	Heparanase-like protein 3
Cc00_g30720	GSCOC_T00002466001	-4.05512329253901	Hypothetical protein
Cc11_g13740	GSCOC_T00032144001	-4.05440293504913	Putative membrane lipoprotein
Cc00_g02000	GSCOC_T00000828001	-4.05390022277229	Mitochondrial transcription termination factor family protein
Cc08_g02380	GSCOC_T00037709001	-4.04986052427514	Ent-kaurenoic acid oxidase 2
Cc04_g02390	GSCOC_T00021910001	-4.03803174405067	GDSL esterase/lipase APG
Cc01_g12960	GSCOC_T00028253001	-4.03776750978746	Expansin-A4
Cc10_g12870	GSCOC_T00035375001	-4.03072174515412	Serine carboxypeptidase-like 42
Cc08_g14680	GSCOC_T00030194001	-4.02713022099503	Tubulin beta-1 chain
Cc10_g11920	GSCOC_T00031871001	-4.02588093910963	Quinone oxidoreductase-like protein At1g23740, chloroplastic
Cc01_g09120	GSCOC_T00023956001	-4.02146677358808	Ferredoxin-3, chloroplastic
Cc02_g05600	GSCOC_T00039073001	-4.01533912597882	Putative WEB family protein At2g38370
Cc07_g14490	GSCOC_T00036609001	-4.00893670604469	Putative uncharacterized protein
Cc03_g07320	GSCOC_T00026577001	-4.00730225229772	Chalcone synthase
Cc02_g34390	GSCOC_T00000680001	-4.00142183475565	Putative pectinesterase/pectinesterase inhibitor 22
Cc05_g12720	GSCOC_T00021155001	-4.00056948762037	Chlorophyll a-b binding protein 13, chloroplastic
Cc01_g08580	GSCOC_T00023887001	-3.99517271824366	Late embryogenesis abundant (LEA) hydroxyproline-rich glycoprotein family
Cc05_g10790	GSCOC_T00021397001	-3.98722629057746	TRICHOME BIREFRINGENCE-LIKE 41
Cc00_g17050	GSCOC_T00008776001	-3.98633367094958	Hypothetical protein
Cc00_g32590	GSCOC_T00011519001	-3.98567412578577	Hypothetical protein
Cc02_g17340	GSCOC_T00014246001	-3.97491164444283	Glucose-1-phosphate adenylyltransferase large subunit 1 (Fragment)
Cc02_g04420	GSCOC_T00020354001	-3.96169265315134	Leucine-rich repeat receptor-like protein kinase TDR
Cc10_g13610	GSCOC_T00035262001	-3.95188320266579	Putative Probable calcium-binding protein CML44
Cc07_g06090	GSCOC_T00039904001	-3.93990376680878	unknown protein; FUNCTIONS IN
Cc04_g05760	GSCOC_T00022342001	-3.93424909880443	Uncharacterized protein At4g14100
Cc01_g12000	GSCOC_T00028119001	-3.92747795420684	Putative 125 kDa kinesin-related protein
Cc01_g11270	GSCOC_T00024252001	-3.925013420732	Beta-galactosidase 8
Cc11_g08470	GSCOC_T00032870001	-3.91677649821242	Putative Protein PLANT CADMIUM RESISTANCE 2
Cc06_g10880	GSCOC_T00041722001	-3.91411311829916	Putative Arabinogalactan peptide, AGP
Cc04_g01380	GSCOC_T00021788001	-3.90457896306642	Putative myb domain protein 7
Cc07_g06680	GSCOC_T00039985001	-3.90313881828588	Arabinogalactan
Cc04_g00830	GSCOC_T00021708001	-3.89022882368023	Subtilisin-like protease
Cc04_g12200	GSCOC_T00005269001	-3.88245052445212	unknown protein; FUNCTIONS IN
Cc11_g14370	GSCOC_T00032066001	-3.87740162817705	MLP-like protein 423
Cc06_g17380	GSCOC_T00036382001	-3.87534666084142	Probable inactive leucine-rich repeat receptor-like protein kinase At3g03770
Cc06_g12990	GSCOC_T00041464001	-3.87240286462549	Putative hydroxyproline-rich glycoprotein family protein
Cc07_g11020	GSCOC_T00037047001	-3.86785588282854	L-ascorbate peroxidase 3, peroxisomal
Cc07_g09190	GSCOC_T00040315001	-3.86564734671449	Putative RmlC-like cupins superfamily protein
Cc09_g00470	GSCOC_T00017946001	-3.86410851818793	Hypothetical protein
Cc05_g07500	GSCOC_T00042280001	-3.85951104343628	Putative uncharacterized protein
Cc06_g23710	GSCOC_T00040535001	-3.85810288924275	Putative uncharacterized protein
Cc02_g09850	GSCOC_T00029601001	-3.85770370315057	Putative Major facilitator superfamily protein
Cc00_g01490	GSCOC_T00010661001	-3.85621132058147	L-type lectin-domain containing receptor kinase IV.1
Cc05_g00040	GSCOC_T00017017001	-3.85187373569196	unknown protein; FUNCTIONS IN
Cc00_g24720	GSCOC_T00004719001	-3.85108183706939	Monomethylxanthine methyltransferase 1
Cc09_g08490	GSCOC_T00020817001	-3.85086777376291	Photosystem I reaction center subunit psaK, chloroplastic
Cc05_g14320	GSCOC_T00038832001	-3.84897848202292	65-kDa microtubule-associated protein 1
Cc04_g10530	GSCOC_T00042605001	-3.83984258057865	GDSL esterase/lipase At3g48460
Cc11_g08480	GSCOC_T00032866001	-3.83827873718685	Putative Protein PLANT CADMIUM RESISTANCE 2
Cc04_g07700	GSCOC_T00022604001	-3.83775645202923	Protein of unknown function, DUF617
Cc11_g12510	GSCOC_T00032309001	-3.83183649193063	Probable S-acyltransferase At1g69420
Cc05_g04840	GSCOC_T00035020001	-3.82729231337919	Putative Septum-promoting GTP-binding protein 1
Cc07_g09850	GSCOC_T00037190001	-3.82588160352766	Mannan endo-1,4-beta-mannosidase 7
Cc10_g00110	GSCOC_T00024447001	-3.82150752487524	Cysteine/Histidine-rich C1 domain family protein
Cc06_g23290	GSCOC_T00040593001	-3.81856213352295	Protein of unknown function (DUF620)
Cc07_g16210	GSCOC_T00037593001	-3.81853319209102	Monothiol glutaredoxin-S2
Cc11_g12830	GSCOC_T00032263001	-3.81783503344661	Expansin-A1
Cc11_g05710	GSCOC_T00020539001	-3.81545171156476	Hypothetical protein
Cc02_g18220	GSCOC_T00014359001	-3.81005075415151	cytochrome b6f complex subunit (petM), putative
Cc01_g21620	GSCOC_T00004958001	-3.80741071151036	Long chain acyl-CoA synthetase 1
Cc05_g04890	GSCOC_T00035027001	-3.79684342610117	Glucose-6-phosphate/phosphate translocator 2, chloroplastic
Cc04_g13440	GSCOC_T00018287001	-3.78248706497513	Predicted protein
Cc07_g10200	GSCOC_T00037148001	-3.78075014415399	Beta-galactosidase 3
Cc01_g10920	GSCOC_T00024208001	-3.76887640175099	Hypothetical protein
Cc08_g05790	GSCOC_T00024369001	-3.76590219718502	SWIB/MDM2 domain superfamily protein
Cc07_g11720	GSCOC_T00036968001	-3.75978303994891	Catalase isozyme 2
Cc00_g27590	GSCOC_T00007291001	-3.75857468772291	Kirola
Cc00_g32100	GSCOC_T00004429001	-3.75717724756437	Class III chitinase (Precursor)
Cc10_g03950	GSCOC_T00034996001	-3.75373984494239	Protein of unknown function, DUF547
Cc10_g06730	GSCOC_T00034618001	-3.74895229780466	Hypothetical protein
Cc05_g00800	GSCOC_T00013171001	-3.74810858736448	Hevamine-A
Cc02_g32130	GSCOC_T00018930001	-3.74755289417782	Probable inactive leucine-rich repeat receptor-like protein kinase At3g03770
Cc09_g01020	GSCOC_T00017869001	-3.74693228723295	Putative Uncharacterized membrane protein At1g16860
Cc06_g12950	GSCOC_T00041469001	-3.7439194835244	Putative Uncharacterized membrane protein At1g06890
Cc07_g07190	GSCOC_T00040057001	-3.7417841077485	Putative unknown protein; FUNCTIONS IN
Cc11_g05810	GSCOC_T00020552001	-3.73771142938038	Purple acid phosphatase 8
Cc05_g07760	GSCOC_T00016777001	-3.73419040177843	Receptor-like protein kinase HSL1
Cc10_g01010	GSCOC_T00024564001	-3.72285416497672	High mobility group B protein 9
Cc01_g19590	GSCOC_T00016040001	-3.7071452147683	Putative Antifungal protein ginkbilobin-2
Cc02_g01620	GSCOC_T00019989001	-3.7026939271196	Probable pectinesterase/pectinesterase inhibitor 34
Cc01_g09790	GSCOC_T00024046001	-3.70191110138624	Putative phytosulfokines 6
Cc05_g05960	GSCOC_T00035184001	-3.67261750965344	Uncharacterized GPI-anchored protein At4g28100
Cc02_g22480	GSCOC_T00014919001	-3.66859250255887	maternal effect embryo arrest 9
Cc11_g16970	GSCOC_T00038251001	-3.66326455729717	Putative Uncharacterized GPI-anchored protein At1g27950
Cc07_g06860	GSCOC_T00040011001	-3.65668089558866	Putative uncharacterized protein
Cc00_g20770	GSCOC_T00008849001	-3.65121441119474	Caffeic acid 3-O-methyltransferase
Cc09_g06960	GSCOC_T00036341001	-3.64971242342541	Theobromine synthase 2
Cc06_g15000	GSCOC_T00030893001	-3.64100626033797	Putative DNA-3-methyladenine glycosylase 1
Cc08_g04630	GSCOC_T00015666001	-3.62796336606877	Pectinacetylesterase family protein
Cc02_g16640	GSCOC_T00014157001	-3.62143524320463	Putative Aquaporin PIP-type
Cc00_g24050	GSCOC_T00009221001	-3.61240696576672	Putative Dehydration-responsive protein RD22
Cc11_g14460	GSCOC_T00032056001	-3.61031954504454	NHL domain-containing protein
Cc02_g15520	GSCOC_T00014003001	-3.60042299206244	Hypothetical protein
Cc00_g02690	GSCOC_T00006658001	-3.59328850520249	Putative Subtilisin-like protease
Cc02_g06310	GSCOC_T00039158001	-3.59239990009565	Putative Vinorine synthase
Cc02_g36020	GSCOC_T00042760001	-3.59186711284832	Putative Probable peptide/nitrate transporter At1g59740
Cc00_g04360	GSCOC_T00005968001	-3.59179170401892	Putative cytochrome BC1 synthesis
Cc04_g03070	GSCOC_T00021996001	-3.58582831479153	D-isomer specific 2-hydroxyacid dehydrogenase family protein
Cc08_g08860	GSCOC_T00017220001	-3.58493964929932	Putative Dehydration-responsive protein RD22
Cc01_g01450	GSCOC_T00037907001	-3.58228024644365	Putative UDP-glycosyltransferase 74F2
Cc02_g28330	GSCOC_T00025208001	-3.58058754535397	Protein of unknown function, DUF642
Cc03_g01200	GSCOC_T00025725001	-3.58047611908659	Putative P-loop containing nucleoside triphosphate hydrolases superfamily protein
Cc00_g13830	GSCOC_T00007200001	-3.56941013440906	Axial regulator YABBY 1
Cc01_g19450	GSCOC_T00016056001	-3.56763841063151	Cyclin-P3-1
Cc06_g14430	GSCOC_T00041257001	-3.54711894420337	Putative glutamine amidotransferase YLR126C
Cc01_g18330	GSCOC_T00016218001	-3.54345162263666	Putative unknown protein; FUNCTIONS IN
Cc07_g20340	GSCOC_T00015677001	-3.53879584499989	Putative Reticuline oxidase-like protein
Cc01_g15790	GSCOC_T00016517001	-3.53726595058942	Uncharacterized protein
Cc08_g09360	GSCOC_T00017288001	-3.52827760995431	Probable peptide transporter At1g52190
Cc02_g05400	GSCOC_T00039048001	-3.52786944417092	RING-H2 finger protein ATL72
Cc05_g14330	GSCOC_T00038831001	-3.52433975882162	Indole-3-acetate O-methyltransferase 1
Cc05_g12020	GSCOC_T00021242001	-3.52375629854146	Protein kinase superfamily protein
Cc05_g10320	GSCOC_T00021462001	-3.52170704748032	Interactor of constitutive active ROPs 4
Cc05_g13360	GSCOC_T00021073001	-3.51937310467532	early nodulin-like protein 9
Cc01_g08630	GSCOC_T00023894001	-3.51839592916626	Putative ovate family protein 6
Cc08_g01190	GSCOC_T00038420001	-3.51231107122226	Putative Glyoxylate reductase
Cc06_g00550	GSCOC_T00023236001	-3.51116350379221	Putative WEB family protein At2g38370
Cc07_g10920	GSCOC_T00037058001	-3.5066281510061	Putative Rhodanese-like domain-containing protein 17
Cc10_g06690	GSCOC_T00034624001	-3.50657025107611	Putative Homeobox-leucine zipper protein ATHB-16
Cc06_g21530	GSCOC_T00008024001	-3.49960856660731	Core-2/I-branching beta-1,6-N-acetylglucosaminyltransferase family protein
Cc04_g06590	GSCOC_T00022450001	-3.48702826059843	Beta-glucosidase 44
Cc04_g03110	GSCOC_T00022000001	-3.48653839762118	Putative unknown protein; FUNCTIONS IN
Cc11_g13820	GSCOC_T00032134001	-3.48488747431665	Putative Transcription factor bHLH79
Cc09_g00420	GSCOC_T00017952001	-3.48399470599496	Oligopeptide transporter 3
Cc02_g19710	GSCOC_T00014544001	-3.47296543171815	Family of unknown function (DUF566) _x0001_
Cc02_g13180	GSCOC_T00029189001	-3.47153499523369	Putative Tetraspanin family protein
Cc03_g00600	GSCOC_T00025645001	-3.47138880155316	Putative Plant invertase/pectin methylesterase inhibitor superfamily protein
Cc00_g13610	GSCOC_T00011114001	-3.47137637514684	Anthocyanidin reductase
Cc02_g08500	GSCOC_T00029785001	-3.47057002130478	Plant protein 1589 of unknown function
Cc02_g24310	GSCOC_T00002340001	-3.46793379259615	Putative lipid-binding protein At4g00165
Cc11_g10190	GSCOC_T00032610001	-3.46646582875141	3-ketoacyl-CoA synthase 6
Cc04_g07590	GSCOC_T00022589001	-3.46341703332851	Hypothetical protein
Cc07_g15630	GSCOC_T00036453001	-3.46232569302229	Peptidyl-prolyl cis-trans isomerase FKBP16-2, chloroplastic
Cc04_g14150	GSCOC_T00035944001	-3.44866535956494	Putative Dof zinc finger protein DOF5.6
Cc09_g06970	GSCOC_T00036338001	-3.44231176386994	7-methylxanthosine synthase 1
Cc07_g01140	GSCOC_T00019202001	-3.44214126814472	Putative CASP-like protein POPTRDRAFT_752786
Cc08_g03920	GSCOC_T00034191001	-3.43915444974053	Putative Cytochrome P450 76C4
Cc02_g05410	GSCOC_T00039049001	-3.43887340461978	Transcription factor RF2b
Cc02_g05390	GSCOC_T00039046001	-3.43741488238085	Putative Chalcone--flavonone isomerase
Cc10_g02240	GSCOC_T00024723001	-3.43668944686311	Auxin-induced protein 5NG4
Cc09_g06760	GSCOC_T00005134001	-3.43002280762558	Putative E3 ubiquitin-protein ligase LIN
Cc09_g03600	GSCOC_T00017526001	-3.42134045917237	Putative gamma-glutamylcyclotransferase At3g02910
Cc01_g17230	GSCOC_T00016350001	-3.41592566225501	Tetratricopeptide repeat (TPR)-like superfamily protein
Cc02_g21720	GSCOC_T00014817001	-3.41505884138032	Chlorophyll a-b binding protein CP24 10A, chloroplastic
Cc06_g13390	GSCOC_T00041403001	-3.40764055192794	CASP-like protein 3
Cc07_g07090	GSCOC_T00040045001	-3.40725269371268	Protein SHORT-ROOT
Cc02_g39650	GSCOC_T00027687001	-3.40445397599615	NC domain-containing protein-related
Cc06_g23550	GSCOC_T00040554001	-3.40435738905277	Organic cation/carnitine transporter 7
Cc10_g06830	GSCOC_T00034606001	-3.40184092523012	F-box protein FBW2
Cc05_g00780	GSCOC_T00013169001	-3.40114671735093	Acidic endochitinase
Cc08_g10680	GSCOC_T00027041001	-3.39665925068129	Putative Fatty acid desaturase 1
Cc10_g12590	GSCOC_T00031977001	-3.39442813870518	Photosystem I reaction center subunit N, chloroplastic
Cc03_g14830	GSCOC_T00026726001	-3.38686657238863	Putative UDP-glycosyltransferase 71C4
Cc11_g10800	GSCOC_T00032528001	-3.38202884129476	Nudix hydrolase 1
Cc10_g08020	GSCOC_T00034451001	-3.38045447292677	Tubulin alpha-2 chain
Cc08_g15060	GSCOC_T00035430001	-3.36801069616825	Putative phosphoglycerate mutase DET1
Cc02_g32290	GSCOC_T00012964001	-3.36561711618466	Putative unknown protein; Has 23 Blast hits to 23 proteins in 9 species
Cc11_g00210	GSCOC_T00019446001	-3.36361657694416	BTB/POZ domain-containing protein At3g19850
Cc10_g01640	GSCOC_T00024647001	-3.35920181586285	Tubulin beta-1 chain
Cc06_g10420	GSCOC_T00041781001	-3.35821327200184	Putative uncharacterized protein
Cc02_g39700	GSCOC_T00027679001	-3.35525429645918	Calcium-transporting ATPase, endoplasmic reticulum-type
Cc07_g12750	GSCOC_T00036836001	-3.35487172100382	unknown protein; FUNCTIONS IN
Cc10_g04830	GSCOC_T00034888001	-3.35137248679427	Putative uncharacterized protein
Cc02_g06400	GSCOC_T00039173001	-3.34744713255103	Omega-3 fatty acid desaturase, chloroplastic
Cc00_g21880	GSCOC_T00013638001	-3.33565686482663	Putative UDP-glycosyltransferase 83A1
Cc11_g17510	GSCOC_T00038325001	-3.33304816702036	Acyl carrier protein 1, chloroplastic
Cc03_g13110	GSCOC_T00030601001	-3.33043546076435	Tetrapyrrole-binding protein, chloroplastic
Cc07_g13350	GSCOC_T00036754001	-3.32716583673826	Probable inactive receptor kinase At1g48480
Cc04_g03220	GSCOC_T00022015001	-3.32389977660917	ATP binding microtubule motor family protein
Cc03_g04140	GSCOC_T00026123001	-3.3192275217605	Putative Kinase interacting (KIP1-like) family protein
Cc08_g16000	GSCOC_T00035548001	-3.3177583880605	Endoglucanase 6
Cc02_g20030	GSCOC_T00014604001	-3.31308086811023	Putative phytosulfokine 4 precursor
Cc06_g20050	GSCOC_T00022903001	-3.31256006491716	plectin-related
Cc09_g09500	GSCOC_T00003714001	-3.30632436354428	Chlorophyll a-b binding protein 36, chloroplastic
Cc07_g12310	GSCOC_T00036890001	-3.30342425623964	Diacylglycerol O-acyltransferase 2
Cc05_g11240	GSCOC_T00021340001	-3.3012222719782	TPR repeat-containing thioredoxin TTL1
Cc02_g31040	GSCOC_T00023875001	-3.29075586023023	Putative Lysosomal beta glucosidase
Cc01_g12250	GSCOC_T00028155001	-3.29017273028445	Putative Protein of unknown function (DUF1635)
Cc01_g10410	GSCOC_T00024137001	-3.28599516085645	Probable xyloglucan endotransglucosylase/hydrolase protein 32
Cc11_g17070	GSCOC_T00038263001	-3.28500326703971	Protein of unknown function (DUF 3339)
Cc02_g13570	GSCOC_T00029131001	-3.28081670324647	30S ribosomal protein S5, chloroplastic
Cc09_g01490	GSCOC_T00017801001	-3.27832043307672	Aminomethyltransferase, mitochondrial
Cc07_g02470	GSCOC_T00039442001	-3.277322442401	Putative Auxin-induced protein 5NG4
Cc11_g10480	GSCOC_T00032571001	-3.27431466756358	Lysine histidine transporter-like 6
Cc06_g23280	GSCOC_T00040594001	-3.27061768071355	Photosystem II 5 kDa protein, chloroplastic
Cc01_g05390	GSCOC_T00027326001	-3.26859358478863	Putative Phospholipase C 2
Cc02_g34070	GSCOC_T00000642001	-3.25894403565139	Putative uncharacterized protein
Cc02_g28930	GSCOC_T00018193001	-3.25226500130278	Serine carboxypeptidase-like 40
Cc02_g10080	GSCOC_T00029568001	-3.2390437263708	Cytochrome P450 77A3
Cc02_g00650	GSCOC_T00019854001	-3.23761238511917	UNC93-like protein 2
Cc02_g33120	GSCOC_T00015326001	-3.23611459739034	Putative uncharacterized protein
Cc01_g05850	GSCOC_T00027411001	-3.2328229736949	Putative Bidirectional sugar transporter SWEET3
Cc06_g22740	GSCOC_T00040675001	-3.23264480608335	Magnesium-protoporphyrin IX monomethyl ester [oxidative] cyclase, chloroplastic
Cc03_g06720	GSCOC_T00026489001	-3.23187832625154	Major facilitator superfamily protein
Cc01_g16990	GSCOC_T00016376001	-3.23094054355078	Probable LRR receptor-like serine/threonine-protein kinase At5g48740
Cc03_g02320	GSCOC_T00025874001	-3.22883065761334	NAD(P)-binding Rossmann-fold superfamily protein
Cc02_g32440	GSCOC_T00001246001	-3.22872612694349	Receptor-like cytosolic serine/threonine-protein kinase RBK2
Cc04_g01990	GSCOC_T00021864001	-3.22332330332397	Beta-galactosidase
Cc06_g02000	GSCOC_T00023440001	-3.22133411124954	Putative Copper transporter 6
Cc03_g08150	GSCOC_T00033208001	-3.21971700573687	Hypothetical protein
Cc02_g04030	GSCOC_T00020306001	-3.21928222041742	EXORDIUM like 3
Cc02_g11770	GSCOC_T00029373001	-3.21194599030738	Oxygen-evolving enhancer protein 3-2, chloroplastic
Cc03_g05470	GSCOC_T00026303001	-3.21157025652831	Putative Phosphoenolpyruvate carboxylase kinase 1
Cc01_g01200	GSCOC_T00037968001	-3.20664602031236	Putative Disease resistance response protein 206
Cc02_g38700	GSCOC_T00027825001	-3.20663494829095	Putative uncharacterized protein
Cc11_g13330	GSCOC_T00032194001	-3.20522414576985	myb domain protein 88
Cc05_g01210	GSCOC_T00000928001	-3.20484643906583	Putative uncharacterized protein
Cc00_g28800	GSCOC_T00011418001	-3.20167890105658	Putative Isoflavone 7-O-methyltransferase
Cc09_g09860	GSCOC_T00006973001	-3.19707281538972	Putative Mavicyanin
Cc08_g14880	GSCOC_T00035399001	-3.18208683186628	Cytochrome P450 86A2
Cc04_g05440	GSCOC_T00022295001	-3.17973397285996	Protein WAX2
Cc05_g12200	GSCOC_T00021221001	-3.17730643274371	Putative CTL-like protein 1
Cc00_g22710	GSCOC_T00002421001	-3.17687350905918	Putative Protein of unknown function (DUF581)
Cc05_g09820	GSCOC_T00021535001	-3.17407160515557	Glucose-1-phosphate adenylyltransferase small subunit, chloroplastic
Cc03_g08140	GSCOC_T00033206001	-3.16748930406985	Putative Reticulon-like protein B13
Cc07_g16650	GSCOC_T00037536001	-3.16168309603118	Protein of unknown function (DUF3511)
Cc05_g12550	GSCOC_T00021176001	-3.15426628841638	S-adenosyl-L-methionine-dependent methyltransferases superfamily protein
Cc02_g00660	GSCOC_T00019856001	-3.14757897203701	UNC93-like protein 2
Cc02_g10380	GSCOC_T00029535001	-3.14294282036934	Putative Bark storage protein A
Cc10_g09410	GSCOC_T00031548001	-3.13788439136834	Putative Protein AIG1
Cc07_g07960	GSCOC_T00040158001	-3.13574298654937	Putative uncharacterized protein
Cc01_g17320	GSCOC_T00016338001	-3.1320409524375	Putative kinase-like protein TMKL1
Cc04_g09720	GSCOC_T00000093001	-3.1286053297022	Thylakoid lumenal 17.9 kDa protein, chloroplastic
Cc07_g02160	GSCOC_T00039398001	-3.12536840583359	Carbonic anhydrase, chloroplastic
Cc05_g15350	GSCOC_T00038702001	-3.12534815750151	Probable LRR receptor-like serine/threonine-protein kinase At4g26540
Cc06_g02700	GSCOC_T00023529001	-3.12250692756643	Actin
Cc03_g12410	GSCOC_T00015223001	-3.12001478504264	Chitinase 2
Cc10_g06860	GSCOC_T00034603001	-3.0955755400898	Phosphate-responsive 1 family protein
Cc05_g08150	GSCOC_T00016827001	-3.08499278134974	Putative uncharacterized protein OSJNBa0095J15.6
Cc07_g12980	GSCOC_T00036806001	-3.08343076313611	indeterminate(ID)-domain 14
Cc09_g06610	GSCOC_T00005114001	-3.07533636608037	Photosystem I reaction center subunit III, chloroplastic
Cc07_g15520	GSCOC_T00036465001	-3.07357647731556	Putative Protein of unknown function (DUF581)
Cc06_g09650	GSCOC_T00041886001	-3.06752712113792	ATP binding microtubule motor family protein
Cc03_g07690	GSCOC_T00026629001	-3.06659554757542	Uncharacterized protein
Cc07_g13320	GSCOC_T00036758001	-3.0644084675881	Cysteine-rich repeat secretory protein 60
Cc11_g15590	GSCOC_T00038076001	-3.05927134584558	Putative unknown protein; BEST Arabidopsis thaliana protein match is
Cc11_g12840	GSCOC_T00032259001	-3.05830022704743	Mitochondrial transcription termination factor family protein
Cc07_g06410	GSCOC_T00039944001	-3.05663647032517	Cyclin-D3-1
Cc06_g13600	GSCOC_T00041373001	-3.05014329860483	Putative Pathogenesis-related protein PRMS
Cc04_g06040	GSCOC_T00022383001	-3.04761299602985	Probable inactive receptor kinase At1g48480
Cc02_g19000	GSCOC_T00014462001	-3.04583085734824	Putative Filament-like plant protein 7
Cc02_g19530	GSCOC_T00014521001	-3.04099557611066	Protein of unknown function (DUF620)
Cc03_g06470	GSCOC_T00026442001	-3.03798038739144	Adenine nucleotide alpha hydrolases-like superfamily protein
Cc04_g13580	GSCOC_T00018263001	-3.03696554216595	Putative Vegetative incompatibility protein HET-E-1
Cc07_g17010	GSCOC_T00037486001	-3.03351061238388	Putative Auxin-induced protein 5NG4
Cc07_g04380	GSCOC_T00039694001	-3.03257225478337	ABC transporter B family member 25
Cc08_g09370	GSCOC_T00017291001	-3.02814834386731	Probable peptide transporter At1g52190
Cc06_g11680	GSCOC_T00041629001	-3.02183941709408	Lycopene epsilon cyclase, chloroplastic
Cc10_g03880	GSCOC_T00024929001	-3.01766329313029	Protein of unknown function, DUF617
Cc08_g16650	GSCOC_T00035631001	-3.00984429713552	Putative Stellacyanin
Cc06_g03680	GSCOC_T00023657001	-2.99987407944966	Putative uncharacterized protein
Cc07_g08740	GSCOC_T00040262001	-2.99615369597387	Putative unknown protein; FUNCTIONS IN
Cc07_g07780	GSCOC_T00040138001	-2.99611964284961	Auxin-responsive protein IAA9
Cc02_g32200	GSCOC_T00012954001	-2.99564202750626	Hypothetical protein
Cc11_g14690	GSCOC_T00032023001	-2.9941253094469	Polygalacturonase-1 non-catalytic subunit beta
Cc02_g03850	GSCOC_T00020286001	-2.99287744571794	Protein of unknown function (DUF668)
Cc06_g18430	GSCOC_T00040458001	-2.99263235839319	Non-specific lipid-transfer protein
Cc10_g01870	GSCOC_T00024676001	-2.99186784087141	Filament-like plant protein 4
Cc02_g04950	GSCOC_T00038987001	-2.98953077485309	Putative Pentatricopeptide repeat-containing protein At1g02060, chloroplastic
Cc02_g16300	GSCOC_T00014112001	-2.98678692477702	Subtilisin-like protease
Cc04_g02320	GSCOC_T00021901001	-2.98386265863122	Putative Predicted protein
Cc05_g10950	GSCOC_T00021378001	-2.97735707008539	NHL domain-containing protein
Cc00_g15710	GSCOC_T00006888001	-2.97336396108617	Ribulose bisphosphate carboxylase small chain SSU11A, chloroplastic
Cc02_g12240	GSCOC_T00029309001	-2.97229094979089	Major facilitator superfamily protein
Cc07_g08590	GSCOC_T00040238001	-2.97164759688279	Putative Probable receptor-like protein kinase At1g67000
Cc02_g07670	GSCOC_T00029906001	-2.97067505266241	Expansin-A4
Cc01_g14750	GSCOC_T00028485001	-2.96688105622293	Putative Zinc finger protein CONSTANS-LIKE 7
Cc01_g10880	GSCOC_T00024202001	-2.96098417246237	Phenylalanine ammonia-lyase
Cc01_g06530	GSCOC_T00030041001	-2.96004157399669	Early nodulin-like protein
Cc07_g00630	GSCOC_T00019141001	-2.95744016317376	Putative Probable inactive leucine-rich repeat receptor-like protein kinase At3g03770
Cc04_g12980	GSCOC_T00011361001	-2.95044800025922	Rac-like GTP-binding protein 3
Cc09_g10110	GSCOC_T00041090001	-2.9498661081625	Putative Subtilisin-like protease
Cc11_g01050	GSCOC_T00019651001	-2.94561215336376	Hypothetical protein
Cc00_g13310	GSCOC_T00009406001	-2.93671312433498	Putative Uncharacterized protein
Cc09_g01700	GSCOC_T00017774001	-2.93024121230432	Peroxidase 42
Cc07_g06020	GSCOC_T00039894001	-2.92429141673188	Putative Remorin family protein
Cc05_g16370	GSCOC_T00038571001	-2.92425846893696	Phosphoglycerate kinase, cytosolic
Cc09_g01120	GSCOC_T00017852001	-2.92398693543506	Putative RING/U-box superfamily protein
Cc00_g12110	GSCOC_T00002210001	-2.92060208557896	Protein of unknown function (DUF1118)
Cc06_g14090	GSCOC_T00041302001	-2.91862589432117	Putative Auxin-induced protein 5NG4
Cc01_g13620	GSCOC_T00028335001	-2.91672120034402	Putative uncharacterized protein
Cc08_g06540	GSCOC_T00036047001	-2.91174674303662	Probable xyloglucan glycosyltransferase 5
Cc01_g18800	GSCOC_T00016154001	-2.90831989128841	Photosystem II reaction center W protein, chloroplastic
Cc02_g29650	GSCOC_T00009344001	-2.90379288667509	Putative Aspartic proteinase nepenthesin-2
Cc06_g12230	GSCOC_T00041563001	-2.90177448965292	Subtilisin-like protease
Cc06_g15570	GSCOC_T00030803001	-2.89949610908423	Putative zinc finger protein 8
Cc07_g09810	GSCOC_T00037195001	-2.89884738933576	Dihydroflavonol-4-reductase
Cc04_g16030	GSCOC_T00042393001	-2.89872753603875	Putative Transcription factor bHLH79
Cc00_g22120	GSCOC_T00009092001	-2.89307176557335	Putative MLP-like protein 28
Cc08_g04660	GSCOC_T00004723001	-2.89022769716563	Putative Cytosolic sulfotransferase 15
Cc11_g10570	GSCOC_T00032560001	-2.88346699659174	Putative leucine-rich repeat receptor-like serine/threonine-protein kinase At2g14440
Cc05_g05360	GSCOC_T00035104001	-2.88344061181969	Putative Scarecrow-like protein 32
Cc03_g04210	GSCOC_T00026131001	-2.8815814150302	Plant protein of unknown function (DUF828) with plant pleckstrin homology-like region
Cc07_g11890	GSCOC_T00036944001	-2.88118736069594	WUSCHEL-related homeobox 8
Cc00_g08510	GSCOC_T00005634001	-2.87325833461622	Putative Cellulose synthase-like protein G2
Cc04_g02690	GSCOC_T00021947001	-2.87176833597642	Putative uncharacterized protein
Cc08_g14310	GSCOC_T00030239001	-2.87137402136721	Putative Predicted protein
Cc03_g01370	GSCOC_T00025749001	-2.86986860840401	S-adenosyl-L-methionine-dependent methyltransferases superfamily protein
Cc02_g11300	GSCOC_T00029428001	-2.8696997361236	Auxin response factor 18
Cc06_g17100	GSCOC_T00012653001	-2.86630576997405	Putative Magnesium-chelatase subunit H
Cc00_g05810	GSCOC_T00012073001	-2.8661428596497	Hypothetical protein
Cc01_g00080	GSCOC_T00012431001	-2.86555822715188	Protein of Unknown Function (DUF239)
Cc09_g07230	GSCOC_T00036293001	-2.86414131035393	Bifunctional dihydrofolate reductase-thymidylate synthase 2
Cc01_g19100	GSCOC_T00016102001	-2.86327525873388	Plant protein of unknown function (DUF828) with plant pleckstrin homology-like region
Cc10_g09590	GSCOC_T00031523001	-2.86099783839661	Hypothetical protein
Cc08_g02990	GSCOC_T00037803001	-2.86012736112156	Putative Bifunctional dihydroflavonol 4-reductase/flavanone 4-reductase
Cc02_g07270	GSCOC_T00029965001	-2.85622913919094	Protein DA1-related 2
Cc06_g01460	GSCOC_T00023365001	-2.84978364751882	Chlorophyll a-b binding protein CP29.2, chloroplastic
Cc01_g10270	GSCOC_T00024112001	-2.84278950546339	Hypothetical protein
Cc02_g26690	GSCOC_T00024970001	-2.84265021743763	Protein of Unknown Function (DUF239)
Cc01_g20020	GSCOC_T00015983001	-2.83579033238902	Histone H2AX
Cc08_g03150	GSCOC_T00037829001	-2.82974213913093	Alpha,alpha-trehalose-phosphate synthase [UDP-forming] 5
Cc09_g07840	GSCOC_T00003768001	-2.82753004174618	Probable LRR receptor-like serine/threonine-protein kinase At4g20940
Cc00_g16400	GSCOC_T00011388001	-2.82639080196252	( )-neomenthol dehydrogenase
Cc09_g03830	GSCOC_T00017498001	-2.82410936087998	Protein TIC 20-II, chloroplastic
Cc10_g01860	GSCOC_T00024675001	-2.82305828079146	Auxin-induced protein 15A
Cc02_g07100	GSCOC_T00009472001	-2.81875513904405	Uncharacterized protein
Cc00_g17490	GSCOC_T00008151001	-2.81579358002872	Protein ASPARTIC PROTEASE IN GUARD CELL 1
Cc08_g13880	GSCOC_T00030292001	-2.81420228516329	Protein HOTHEAD
Cc02_g35750	GSCOC_T00042800001	-2.81380456992831	Probable receptor-like protein kinase At2g42960
Cc05_g08180	GSCOC_T00016832001	-2.80806681478892	Putative uncharacterized protein OSJNBa0095J15.6
Cc03_g14910	GSCOC_T00026740001	-2.80777873568917	Putative UPF0481 protein At3g02645
Cc07_g10490	GSCOC_T00037109001	-2.80562587722142	Putative ATP binding microtubule motor family protein
Cc05_g14120	GSCOC_T00038859001	-2.80152935873422	Putative uncharacterized protein
Cc02_g39980	GSCOC_T00027634001	-2.79940614746993	Thylakoid membrane phosphoprotein 14 kDa, chloroplastic
Cc04_g03720	GSCOC_T00022069001	-2.79870146057591	Putative Gibberellin 20 oxidase 3
Cc09_g03520	GSCOC_T00017537001	-2.79513153944658	Putative uncharacterized protein
Cc11_g12000	GSCOC_T00032372001	-2.79367419289914	Probable inactive purple acid phosphatase 1
Cc06_g00880	GSCOC_T00023291001	-2.79169575283841	Putative Mitoferrin
Cc10_g04620	GSCOC_T00034914001	-2.79087477733169	Probable serine/threonine-protein kinase At1g01540
Cc06_g10560	GSCOC_T00041762001	-2.79076455027972	IQ-domain 26
Cc08_g01560	GSCOC_T00038368001	-2.78498860971578	Protein of unknown function (DUF581)
Cc08_g09250	GSCOC_T00017270001	-2.78175301175823	Phosphorylase superfamily protein
Cc10_g08170	GSCOC_T00034428001	-2.7782446154564	Glutamyl-tRNA reductase 1, chloroplastic
Cc07_g08720	GSCOC_T00040260001	-2.77613230006628	Chloroplastic group IIB intron splicing facilitator CRS2, chloroplastic
Cc08_g08830	GSCOC_T00017215001	-2.77191198843792	BURP domain-containing protein 3
Cc05_g11820	GSCOC_T00021266001	-2.76883299044061	Serine/threonine-protein kinase WNK (With No Lysine)-related
Cc02_g13780	GSCOC_T00029098001	-2.76827274466492	Predicted protein
Cc08_g02390	GSCOC_T00037711001	-2.76733189118242	Glycine cleavage system H protein, mitochondrial
Cc09_g10590	GSCOC_T00041026001	-2.76198843519591	Putative Uncharacterized protein ycf39
Cc11_g15280	GSCOC_T00038037001	-2.75805462885834	1,4-Dihydroxy-2-naphthoyl-CoA synthase, peroxisomal
Cc04_g03830	GSCOC_T00022092001	-2.75704107074877	alpha/beta-Hydrolases superfamily protein
Cc01_g02560	GSCOC_T00009683001	-2.75622868412453	Amino acid permease family protein
Cc05_g10400	GSCOC_T00021451001	-2.75555296612636	Putative Heme-binding protein 2
Cc02_g15110	GSCOC_T00013945001	-2.7494953346352	Putative Protein of unknown function (DUF688)
Cc10_g11640	GSCOC_T00001438001	-2.74841826400397	Acyl-CoA N-acyltransferases (NAT) superfamily protein
Cc07_g14150	GSCOC_T00036651001	-2.74673053127246	MADS-box protein SVP
Cc11_g10810	GSCOC_T00032527001	-2.74346863398908	Phosphoenolpyruvate carboxylase 4
Cc01_g16620	GSCOC_T00016419001	-2.7422133258418	Putative ER lumen protein retaining receptor
Cc02_g13600	GSCOC_T00029126001	-2.73443628851738	Squamosa promoter-binding protein 1
Cc07_g09660	GSCOC_T00037213001	-2.72948166719403	Putative Transcription factor bHLH64
Cc05_g00760	GSCOC_T00013166001	-2.72692347849293	Acidic endochitinase
Cc00_g06220	GSCOC_T00010066001	-2.72691529918643	Putative uncharacterized protein
Cc06_g00710	GSCOC_T00023270001	-2.72609589467409	Patellin-6
Cc06_g01660	GSCOC_T00023395001	-2.72438578444115	Putative UPF0503 protein At3g09070, chloroplastic
Cc02_g04100	GSCOC_T00020313001	-2.72265849400659	21 kDa protein
Cc10_g01080	GSCOC_T00024574001	-2.72242410947151	Plastocyanin, chloroplastic
Cc06_g09470	GSCOC_T00041911001	-2.7190149418732	Putative Serine incorporator 3
Cc07_g12330	GSCOC_T00036888001	-2.71630940969481	unknown protein; FUNCTIONS IN
Cc06_g06460	GSCOC_T00031380001	-2.71508609978672	NDR1/HIN1-like 1
Cc05_g00810	GSCOC_T00013173001	-2.71280785823914	Acidic endochitinase SE2
Cc06_g20650	GSCOC_T00023014001	-2.71063866019169	Putative Polynucleotidyl transferase, ribonuclease H-like superfamily protein
Cc02_g11290	GSCOC_T00029429001	-2.7040681034209	Putative GATA transcription factor 9
Cc07_g06710	GSCOC_T00039992001	-2.70391861262781	Putative Sigma factor sigB regulation protein rsbQ
Cc02_g08120	GSCOC_T00029843001	-2.69504046400039	ACT domain-containing protein
Cc06_g04650	GSCOC_T00042980001	-2.69419419648417	Putative UDP-glycosyltransferase 73C1
Cc00_g05690	GSCOC_T00011954001	-2.69265177591148	Putative amidase C869.01
Cc06_g19330	GSCOC_T00028993001	-2.69059970385903	Hypothetical protein
Cc03_g03330	GSCOC_T00026017001	-2.68817839822996	Glucose-1-phosphate adenylyltransferase large subunit 1, chloroplastic
Cc03_g04120	GSCOC_T00026120001	-2.68597216541085	Putative Protein XRI1
Cc01_g12020	GSCOC_T00028122001	-2.6850789393761	Chitinase 2
Cc01_g08770	GSCOC_T00023912001	-2.68031848308156	Putative unknown protein; LOCATED IN
Cc06_g20800	GSCOC_T00015871001	-2.67949399991868	Putative Macrophage migration inhibitory factor homolog
Cc02_g33910	GSCOC_T00008637001	-2.67262489587296	Predicted protein (Fragment)
Cc00_g14640	GSCOC_T00012542001	-2.671538840566	Putative Squamosa promoter-binding-like protein 9
Cc05_g11450	GSCOC_T00021313001	-2.67106783745732	Putative uncharacterized protein
Cc10_g13710	GSCOC_T00035247001	-2.66306065659866	Protein kinase protein with adenine nucleotide alpha hydrolases-like domain
Cc11_g16230	GSCOC_T00038159001	-2.66233307605416	Photosystem II core complex proteins psbY, chloroplastic
Cc00_g30520	GSCOC_T00013512001	-2.66196976041979	Putative Miraculin
Cc01_g12260	GSCOC_T00028156001	-2.66173061339627	Aquaporin TIP1-1
Cc03_g05520	GSCOC_T00026309001	-2.66023973769134	Myb-related protein Myb4
Cc02_g21310	GSCOC_T00014768001	-2.65817801820754	UDP-glycosyltransferase 85A3
Cc05_g08190	GSCOC_T00016833001	-2.65619197142195	CMV 1a interacting protein 1
Cc03_g00020	GSCOC_T00025573001	-2.65319981474526	Aspartic proteinase oryzasin-1
Cc00_g07170	GSCOC_T00011728001	-2.64950477975362	Putative UDP-glucose flavonoid 3-O-glucosyltransferase 3
Cc05_g06700	GSCOC_T00042174001	-2.64854174037073	Probable indole-3-acetic acid-amido synthetase GH3.5
Cc05_g12210	GSCOC_T00021220001	-2.64625203751309	Putative Choline transporter-like protein 1
Cc04_g07160	GSCOC_T00022522001	-2.64437076522265	Putative Zinc finger protein CONSTANS-LIKE 16
Cc04_g02940	GSCOC_T00021978001	-2.64371135690842	Probable peptide transporter At1g52190
Cc10_g16420	GSCOC_T00013398001	-2.64198713054212	Putative uncharacterized protein
Cc01_g15310	GSCOC_T00016578001	-2.63674220267583	RING-H2 finger protein ATL73
Cc05_g06750	GSCOC_T00042185001	-2.63596301854163	Thylakoid lumenal protein At1g03610, chloroplastic
Cc07_g15380	GSCOC_T00036482001	-2.63367330326464	Probable trehalose-phosphate phosphatase J
Cc00_g30920	GSCOC_T00002387001	-2.63183060033669	unknown protein; FUNCTIONS IN
Cc03_g01950	GSCOC_T00025828001	-2.62310843120363	ralf-like 33
Cc04_g03050	GSCOC_T00021993001	-2.62252211212942	Photosystem I reaction center subunit VI, chloroplastic
Cc05_g06740	GSCOC_T00042183001	-2.61893997610063	Probable protein phosphatase 2C 52
Cc06_g18440	GSCOC_T00040460001	-2.61890180057633	Non-specific lipid-transfer protein
Cc08_g14000	GSCOC_T00030276001	-2.61849532541247	BAG family molecular chaperone regulator 3
Cc11_g00220	GSCOC_T00019447001	-2.6173632495515	Putative Probable galactinol--sucrose galactosyltransferase 2
Cc02_g05700	GSCOC_T00039085001	-2.6169551089302	BEST Arabidopsis thaliana protein match is
Cc11_g16910	GSCOC_T00038243001	-2.61321794740224	Chlorophyll a-b binding protein, chloroplastic
Cc10_g09230	GSCOC_T00034272001	-2.60795656013334	Protein of unknown function (DUF579)
Cc05_g13240	GSCOC_T00021089001	-2.60790299206716	unknown protein; FUNCTIONS IN
Cc04_g15550	GSCOC_T00042327001	-2.60732511943184	Protein of unknown function (DUF1118)
Cc03_g14880	GSCOC_T00026734001	-2.6068115951107	Putative disease resistance protein RGA4
Cc08_g08290	GSCOC_T00007239001	-2.6007658706727	PsbP domain-containing protein 5, chloroplastic
Cc07_g18480	GSCOC_T00018747001	-2.59478257862834	NAD(P)H
Cc01_g21380	GSCOC_T00004986001	-2.58921121801495	Protein PROLIFERA
Cc03_g02170	GSCOC_T00025854001	-2.58756606391715	Putative Tip elongation aberrant protein 1
Cc05_g09640	GSCOC_T00021558001	-2.58551818934852	Probable receptor-like protein kinase At2g42960
Cc02_g39680	GSCOC_T00027682001	-2.58360586862876	Calcium-binding protein KIC
Cc08_g08910	GSCOC_T00017228001	-2.57881915973612	Putative BURP domain-containing protein 5
Cc04_g02480	GSCOC_T00021920001	-2.57689800455836	IQ-domain 26
Cc05_g00350	GSCOC_T00017064001	-2.57638159431613	Putative Acidic endochitinase
Cc07_g14820	GSCOC_T00036564001	-2.57621428320705	Phospho-2-dehydro-3-deoxyheptonate aldolase 1, chloroplastic
Cc05_g11320	GSCOC_T00021331001	-2.57401611139226	Putative uncharacterized protein
Cc00_g21360	GSCOC_T00011619001	-2.57230143373104	Transmembrane amino acid transporter family protein
Cc01_g15890	GSCOC_T00016506001	-2.56782921241501	Photosystem I reaction center subunit XI, chloroplastic
Cc05_g05700	GSCOC_T00035146001	-2.56705837305718	Adenine nucleotide alpha hydrolases-like superfamily protein
Cc10_g09760	GSCOC_T00031503001	-2.56633411834739	Putative Probable peptide/nitrate transporter At1g22540
Cc04_g16560	GSCOC_T00035761001	-2.56528562971413	Geranylgeranyl diphosphate reductase, chloroplastic
Cc10_g03020	GSCOC_T00024817001	-2.55854967470851	Protein of unknown function (DUF1195)
Cc11_g12420	GSCOC_T00032318001	-2.55628836361519	Putative Uncharacterized protein At5g01610
Cc00_g20290	GSCOC_T00010953001	-2.55601418083754	Cysteine proteinase RD19a
Cc05_g05370	GSCOC_T00035105001	-2.5506760054152	Putative BTB/POZ domain-containing protein At3g22104
Cc00_g18490	GSCOC_T00005333001	-2.54771995335478	Codeine O-demethylase
Cc07_g04120	GSCOC_T00039663001	-2.54763388187925	Predicted protein
Cc10_g04260	GSCOC_T00034956001	-2.54608537656008	Putative BRI1 kinase inhibitor 1
Cc08_g07030	GSCOC_T00025297001	-2.54352378724222	Putative Patatin group A-3
Cc08_g12840	GSCOC_T00030423001	-2.54258614997377	Adenine phosphoribosyltransferase 1, chloroplastic
Cc11_g17080	GSCOC_T00038264001	-2.53876737167967	Protein of unknown function (DUF 3339)
Cc00_g23530	GSCOC_T00009087001	-2.53827081184403	Serine carboxypeptidase-like 13
Cc04_g09420	GSCOC_T00022830001	-2.53720925478726	Putative uncharacterized protein
Cc08_g12950	GSCOC_T00030407001	-2.53671784930565	Protein YABBY 4
Cc10_g00160	GSCOC_T00024454001	-2.53289028197181	Putative Probable inactive serine/threonine-protein kinase bub1
Cc00_g11330	GSCOC_T00007152001	-2.52801475023578	Putative Bark storage protein A
Cc00_g32010	GSCOC_T00012890001	-2.52783207648212	Thioredoxin H2
Cc11_g09660	GSCOC_T00032691001	-2.52735589447987	Probable inactive leucine-rich repeat receptor-like protein kinase At1g66830
Cc04_g05100	GSCOC_T00022255001	-2.52545896862884	NDH-dependent cyclic electron flow 1
Cc04_g02910	GSCOC_T00021974001	-2.52379160169751	Predicted protein
Cc02_g28350	GSCOC_T00025211001	-2.52279701635673	Cycloartenol-C-24-methyltransferase 1
Cc03_g06240	GSCOC_T00026414001	-2.5173843697326	Putative Protein of unknown function (DUF3527)
Cc02_g16540	GSCOC_T00014147001	-2.51606252688779	Triosephosphate isomerase, chloroplastic
Cc07_g08570	GSCOC_T00040236001	-2.51207186768188	Non-specific lipid-transfer protein 2
Cc09_g01560	GSCOC_T00017793001	-2.50710152289551	5'-adenylylsulfate reductase 3, chloroplastic
Cc02_g34790	GSCOC_T00011786001	-2.50657345904422	Putative unknown protein; BEST Arabidopsis thaliana protein match is
Cc07_g02590	GSCOC_T00039457001	-2.50593059846243	Peroxidase 63
Cc07_g14060	GSCOC_T00036660001	-2.50384279467128	nicotinamidase 1
Cc10_g03510	GSCOC_T00024877001	-2.50366100171742	30S ribosomal protein S9, chloroplastic (Fragment)
Cc08_g11220	GSCOC_T00027119001	-2.49557292403304	peptidyl-prolyl cis-trans isomerases
Cc07_g15530	GSCOC_T00036464001	-2.49328052959787	Inositol-3-phosphate synthase
Cc05_g12370	GSCOC_T00021199001	-2.49286799272804	Protochlorophyllide reductase, chloroplastic
Cc06_g04020	GSCOC_T00023706001	-2.49282287790279	Adenosine kinase 2
Cc07_g08090	GSCOC_T00040171001	-2.48169281030091	Protein kinase superfamily protein
Cc08_g02700	GSCOC_T00037754001	-2.47923082398514	Carboxylesterase 1
Cc09_g01760	GSCOC_T00017767001	-2.47653232346004	Uncharacterized GPI-anchored protein At1g61900
Cc08_g03110	GSCOC_T00037821001	-2.47584532651537	Putative uncharacterized protein
Cc06_g13090	GSCOC_T00041448001	-2.4740420419112	Peroxidase 16
Cc08_g13270	GSCOC_T00030363001	-2.47333323958533	unknown protein; INVOLVED IN
Cc01_g20190	GSCOC_T00015962001	-2.46557148341182	Putative Xanthoxin dehydrogenase
Cc09_g10600	GSCOC_T00041025001	-2.46388954301188	Hypothetical protein
Cc07_g09540	GSCOC_T00037227001	-2.46376261662755	Putative Maf-like protein DDB_G0281937
Cc02_g31310	GSCOC_T00027586001	-2.46311906930597	Probable RNA helicase SDE3
Cc09_g00110	GSCOC_T00017990001	-2.46304380490036	Putative uncharacterized protein
Cc05_g12060	GSCOC_T00021236001	-2.44898598094625	Metallothionein-like protein type 3
Cc02_g39890	GSCOC_T00027645001	-2.44802309761058	3-ketoacyl-CoA synthase 1
Cc08_g15580	GSCOC_T00035495001	-2.44256653026367	Putative uncharacterized protein
Cc08_g14970	GSCOC_T00035416001	-2.44163899731481	unknown protein; FUNCTIONS IN
Cc02_g22410	GSCOC_T00014912001	-2.44158055738076	Putative Elongation of fatty acids protein 1
Cc01_g17350	GSCOC_T00016335001	-2.44108019451631	unknown protein; FUNCTIONS IN
Cc00_g03610	GSCOC_T00008277001	-2.43822842022339	Cycloeucalenol cycloisomerase
Cc10_g07490	GSCOC_T00034515001	-2.43713463072016	Probable beta-D-xylosidase 7
Cc11_g08610	GSCOC_T00032849001	-2.43623705435802	Serine carboxypeptidase-like 50
Cc02_g20400	GSCOC_T00014653001	-2.43354670792083	Malate dehydrogenase, glyoxysomal
Cc08_g17170	GSCOC_T00035706001	-2.4323002215643	Probable methyltransferase PMT18
Cc08_g14450	GSCOC_T00030221001	-2.42849899051414	Putative Protein LURP-one-related 4
Cc08_g13220	GSCOC_T00030368001	-2.42656992360635	Putative Protein STRUBBELIG-RECEPTOR FAMILY 8
Cc02_g20290	GSCOC_T00014638001	-2.426342633231	Pathogenesis-related protein 1B
Cc06_g06900	GSCOC_T00031327001	-2.42521614528902	Fasciclin-like arabinogalactan protein 17
Cc01_g08950	GSCOC_T00023933001	-2.42459568708513	Putative NAD(P)H-quinone oxidoreductase subunit N
Cc08_g13160	GSCOC_T00030375001	-2.42096173230033	Primary amine oxidase
Cc02_g17840	GSCOC_T00014312001	-2.42064249785745	PPPDE putative thiol peptidase family protein
Cc11_g14310	GSCOC_T00032073001	-2.42024998761966	unknown protein; FUNCTIONS IN
Cc06_g20040	GSCOC_T00022900001	-2.41906133762048	Hypothetical protein
Cc11_g16950	GSCOC_T00038248001	-2.41659212698939	Putative uncharacterized protein
Cc10_g02560	GSCOC_T00024760001	-2.41503318592871	Jasmonate O-methyltransferase
Cc01_g12910	GSCOC_T00028243001	-2.41007751040685	Triosephosphate isomerase, cytosolic
Cc02_g06770	GSCOC_T00039224001	-2.40827593694046	Auxin transporter-like protein 2
Cc11_g11670	GSCOC_T00032416001	-2.40540968020421	Putative uncharacterized protein
Cc00_g14310	GSCOC_T00011140001	-2.4043466903011	NADP-dependent D-sorbitol-6-phosphate dehydrogenase
Cc06_g15140	GSCOC_T00030875001	-2.40433249915615	Putative Reticulon-like protein B21
Cc04_g09340	GSCOC_T00022817001	-2.40342843968172	Potassium channel SKOR
Cc03_g01750	GSCOC_T00025797001	-2.40334814928876	Putative Transducin/WD40 repeat-like superfamily protein
Cc01_g12270	GSCOC_T00028157001	-2.40057576912427	Putative 3-hydroxyacyl-CoA dehydratase 2
Cc04_g05930	GSCOC_T00022367001	-2.40013939630838	Serine carboxypeptidase-like 45
Cc02_g37510	GSCOC_T00027980001	-2.39872543000798	( )-neomenthol dehydrogenase
Cc06_g12720	GSCOC_T00041501001	-2.39545229487746	Putative GDSL esterase/lipase 5
Cc03_g03590	GSCOC_T00026052001	-2.39115614142125	Photosystem I reaction center subunit II, chloroplastic
Cc08_g16970	GSCOC_T00035675001	-2.38907841999514	Granule-bound starch synthase 1, chloroplastic/amyloplastic
Cc01_g12870	GSCOC_T00028238001	-2.38782723397721	Outer envelope pore protein 16, chloroplastic
Cc03_g11110	GSCOC_T00042068001	-2.38682983511774	Hypothetical protein
Cc01_g14550	GSCOC_T00028457001	-2.3861305816869	Putative BAG family molecular chaperone regulator 4
Cc08_g16430	GSCOC_T00035604001	-2.38556556313111	Hypothetical protein
Cc02_g36770	GSCOC_T00003881001	-2.38357658376062	Ferric reduction oxidase 7, chloroplastic
Cc01_g14140	GSCOC_T00028405001	-2.38349590642327	Ammonium transporter 1 member 3
Cc03_g04670	GSCOC_T00026194001	-2.3831236886874	Auxin-responsive protein IAA7
Cc01_g17770	GSCOC_T00016283001	-2.38181030394513	Photosystem II reaction center PSB28 protein, chloroplastic
Cc11_g15140	GSCOC_T00001011001	-2.37884182196507	Predicted protein
Cc04_g07800	GSCOC_T00022617001	-2.37789282167725	Calcium sensing receptor, chloroplastic
Cc11_g15880	GSCOC_T00038114001	-2.37741765865875	GDSL esterase/lipase At3g26430
Cc02_g04990	GSCOC_T00038996001	-2.37242345397502	Putative uncharacterized protein
Cc08_g14470	GSCOC_T00030219001	-2.37187192656972	Putative O-glucosyltransferase rumi homolog
Cc04_g11200	GSCOC_T00037284001	-2.37030696580951	Cytochrome P450 71A1
Cc08_g12470	GSCOC_T00030476001	-2.36797276509552	Putative Predicted protein
Cc03_g02460	GSCOC_T00025892001	-2.36707909002077	Superoxide dismutase [Cu-Zn]
Cc10_g02840	GSCOC_T00024793001	-2.36686889134586	Predicted protein
Cc02_g06960	GSCOC_T00039252001	-2.36510391867461	Sedoheptulose-1,7-bisphosphatase, chloroplastic
Cc03_g05670	GSCOC_T00026332001	-2.36370568395115	Putative COP1-interacting protein-related
Cc03_g00620	GSCOC_T00025647001	-2.36119799635881	Putative uncharacterized protein
Cc00_g31460	GSCOC_T00011251001	-2.3607054362559	Putative UDP-rhamnose
Cc06_g10350	GSCOC_T00041790001	-2.35980897871128	Putative Probable RNA-dependent RNA polymerase 5
Cc02_g36780	GSCOC_T00003879001	-2.35960945637715	Endoglucanase 25
Cc03_g03360	GSCOC_T00026020001	-2.35814508761713	Mitogen-activated protein kinase kinase kinase 3
Cc04_g13610	GSCOC_T00003550001	-2.35653238345552	ABC transporter G family member 11
Cc10_g03550	GSCOC_T00024882001	-2.35587442879897	Putative Predicted protein
Cc03_g01080	GSCOC_T00025711001	-2.35494711870212	Hypothetical protein
Cc02_g28510	GSCOC_T00009437001	-2.35465644867162	Putative RNA polymerase sigma factor rpoD
Cc02_g19550	GSCOC_T00014523001	-2.35140181034743	SWIB/MDM2 domain superfamily protein
Cc01_g07860	GSCOC_T00015461001	-2.35134812850926	Putative axial regulator YABBY 2
Cc00_g25800	GSCOC_T00009824001	-2.34903375381585	Hypothetical protein
Cc00_g31940	GSCOC_T00009627001	-2.3479738136665	UDP-glucuronate 4-epimerase 6
Cc10_g00400	GSCOC_T00024490001	-2.34405917329447	expressed protein localized to the inner membrane of the chloroplast.
Cc02_g19580	GSCOC_T00014526001	-2.34258420939558	Putative Zinc finger SWIM domain-containing protein 7
Cc04_g03020	GSCOC_T00021988001	-2.34021899592611	Putative Uncharacterized protein At4g01150, chloroplastic
Cc10_g00410	GSCOC_T00024491001	-2.34009349606111	Glyceraldehyde-3-phosphate dehydrogenase B, chloroplastic
Cc02_g22400	GSCOC_T00014910001	-2.338580940753	Putative Thaumatin-like protein
Cc04_g06340	GSCOC_T00022420001	-2.33633905178289	Thaumatin-like protein
Cc01_g15900	GSCOC_T00016505001	-2.33373219302273	Putative Haloalkane dehalogenase
Cc01_g07830	GSCOC_T00015458001	-2.33318789620431	Putative Protein FAF-like, chloroplastic
Cc06_g16080	GSCOC_T00030740001	-2.33284050628934	Putative Protein of unknown function DUF647
Cc11_g11280	GSCOC_T00032466001	-2.32909734529322	Chaperonin 60 subunit beta 4, chloroplastic
Cc01_g01060	GSCOC_T00037993001	-2.32714160736547	unknown protein; FUNCTIONS IN
Cc11_g08270	GSCOC_T00032900001	-2.32623220394921	inorganic carbon transport protein-related
Cc07_g04970	GSCOC_T00039758001	-2.32406387596216	Putative NAD(P)-binding Rossmann-fold superfamily protein
Cc05_g09930	GSCOC_T00021522001	-2.32368883157947	Chlorophyll a-b binding protein 8, chloroplastic
Cc04_g07490	GSCOC_T00022569001	-2.3222904896478	Duplicated homeodomain-like superfamily protein
Cc01_g10280	GSCOC_T00024113001	-2.32157673413898	Superoxide dismutase [Cu-Zn], chloroplastic
Cc01_g04060	GSCOC_T00039270001	-2.31841876624898	Linoleate 13S-lipoxygenase 2-1, chloroplastic
Cc01_g09770	GSCOC_T00024043001	-2.31823221960317	Nucleobase-ascorbate transporter 12
Cc01_g11220	GSCOC_T00024241001	-2.31694977814555	Putative BEST Arabidopsis thaliana protein match is
Cc06_g06270	GSCOC_T00031404001	-2.31484212685697	Putative Lysosomal Pro-X carboxypeptidase
Cc02_g26530	GSCOC_T00024950001	-2.31261116363531	50S ribosomal protein L3, chloroplastic (Fragment)
Cc08_g05740	GSCOC_T00024363001	-2.31106253398256	Chitinase-like protein 2
Cc07_g14120	GSCOC_T00036654001	-2.30944812448324	Putative DUF246 domain-containing protein At1g04910
Cc02_g23830	GSCOC_T00015087001	-2.30913910849842	Putative Bifunctional dihydroflavonol 4-reductase/flavanone 4-reductase
Cc08_g08370	GSCOC_T00007228001	-2.30675094903963	Caffeic acid 3-O-methyltransferase
Cc06_g04260	GSCOC_T00023738001	-2.30524879544073	ABC transporter B family member 1
Cc09_g10130	GSCOC_T00041085001	-2.30248579654227	Alpha,alpha-trehalose-phosphate synthase [UDP-forming] 1
Cc06_g01860	GSCOC_T00023422001	-2.30122233991535	Fructose-1,6-bisphosphatase, chloroplastic
Cc02_g05510	GSCOC_T00039062001	-2.30058231073629	unknown protein; Has 39 Blast hits to 39 proteins in 15 species
Cc10_g04880	GSCOC_T00034882001	-2.29580532560684	Protein of unknown function (DUF3223)
Cc06_g06960	GSCOC_T00031320001	-2.29538386736698	ABC transporter G family member 22
Cc03_g14460	GSCOC_T00026663001	-2.29430651040507	Putative Rhodanese/Cell cycle control phosphatase superfamily protein
Cc01_g17500	GSCOC_T00016317001	-2.29235153015633	Photosystem I reaction center subunit IV A, chloroplastic
Cc02_g32730	GSCOC_T00016689001	-2.2921353193155	Putative Prefoldin chaperone subunit family protein
Cc06_g12610	GSCOC_T00041515001	-2.29110701454409	Peroxiredoxin Q, chloroplastic
Cc10_g07750	GSCOC_T00034483001	-2.29067865611441	Squalene monooxygenase
Cc05_g13990	GSCOC_T00038874001	-2.2887978102987	Hypothetical protein
Cc06_g05880	GSCOC_T00043156001	-2.28707854358122	Putative Bifunctional monodehydroascorbate reductase and carbonic anhydrase nectarin-3
Cc01_g09780	GSCOC_T00024045001	-2.28527610119286	Arogenate dehydratase/prephenate dehydratase 6, chloroplastic
Cc00_g01090	GSCOC_T00015890001	-2.28228893535877	Rop guanine nucleotide exchange factor 1
Cc10_g06080	GSCOC_T00034712001	-2.2797820373113	ATP synthase delta chain, chloroplastic
Cc02_g03930	GSCOC_T00020295001	-2.27875610091012	unknown protein; BEST Arabidopsis thaliana protein match is
Cc01_g13590	GSCOC_T00028331001	-2.27183019654421	Putative Protein of unknown function (DUF3527)
Cc02_g35060	GSCOC_T00011820001	-2.27111452968606	Uncharacterized protein
Cc02_g21830	GSCOC_T00014831001	-2.2614081411826	Beta-xylosidase/alpha-L-arabinofuranosidase 2
Cc06_g13170	GSCOC_T00041436001	-2.25986675139474	Putative Protein VERNALIZATION INSENSITIVE 3
Cc07_g10450	GSCOC_T00037115001	-2.25483753296293	Probable fructose-bisphosphate aldolase 2, chloroplastic
Cc07_g05790	GSCOC_T00039860001	-2.2507733726983	Peptidyl-prolyl cis-trans isomerase CYP40
Cc01_g17600	GSCOC_T00016302001	-2.2485114800542	Hypothetical protein
Cc07_g10820	GSCOC_T00037068001	-2.24850406160574	Ferredoxin--NADP reductase, leaf-type isozyme, chloroplastic
Cc00_g22250	GSCOC_T00007434001	-2.24786929071727	Blue copper protein
Cc07_g14030	GSCOC_T00036664001	-2.24758683861718	Nucleobase-ascorbate transporter 11
Cc05_g11780	GSCOC_T00021271001	-2.24483911945933	Putative Ribosomal protein L11 methyltransferase
Cc02_g16950	GSCOC_T00014197001	-2.24398280324292	Probable fructose-bisphosphate aldolase 2, chloroplastic
Cc07_g03150	GSCOC_T00039533001	-2.24396799328027	Putative Protein IQ-DOMAIN 31
Cc02_g22300	GSCOC_T00014899001	-2.24064174413656	Lung seven transmembrane receptor family protein
Cc05_g06850	GSCOC_T00042200001	-2.23920621541441	Protochlorophyllide reductase, chloroplastic
Cc05_g00840	GSCOC_T00013178001	-2.23673231231954	Oxygen-evolving enhancer protein 2, chloroplastic
Cc10_g07710	GSCOC_T00034488001	-2.23666543690413	Transcription factor bHLH74
Cc07_g10350	GSCOC_T00037127001	-2.23666484181335	Putative GATA transcription factor 5
Cc01_g16070	GSCOC_T00016485001	-2.23593496634918	Monocopper oxidase-like protein SKU5
Cc01_g10450	GSCOC_T00024141001	-2.22824761014208	Serine carboxypeptidase-like 48
Cc07_g06540	GSCOC_T00039965001	-2.22777072158353	Putative Exostosin family protein
Cc01_g16040	GSCOC_T00016489001	-2.22730923852166	FAD-dependent oxidoreductase family protein
Cc08_g06890	GSCOC_T00025236001	-2.22628009022013	Putative Cytosolic sulfotransferase 15
Cc05_g13120	GSCOC_T00021103001	-2.22563659400565	zinc finger protein-related
Cc02_g25620	GSCOC_T00028725001	-2.22191204024541	FUNCTIONS IN
Cc02_g22350	GSCOC_T00014904001	-2.21960039846888	Probable plastid-lipid-associated protein 4, chloroplastic
Cc05_g12390	GSCOC_T00021196001	-2.21568349795846	Protein of unknown function (DUF1218)
Cc11_g13640	GSCOC_T00032156001	-2.21509477122472	Putative DnaJ homolog subfamily B member 1
Cc07_g08400	GSCOC_T00040213001	-2.21482874581845	ATP synthase subunit beta, mitochondrial
Cc01_g12820	GSCOC_T00028232001	-2.21311075778606	Fasciclin-like arabinogalactan protein 4
Cc07_g03260	GSCOC_T00039550001	-2.21176589924243	Tubulin alpha chain
Cc02_g11580	GSCOC_T00029393001	-2.21021083899245	Uncharacterized protein
Cc01_g11650	GSCOC_T00028070001	-2.20947191324622	Putative Interactor of constitutive active ROPs 3
Cc02_g18340	GSCOC_T00014374001	-2.20792647993688	Putative Polyneuridine-aldehyde esterase
Cc02_g16530	GSCOC_T00014146001	-2.20557769854794	Triosephosphate isomerase, chloroplastic
Cc04_g03790	GSCOC_T00022085001	-2.20365812750032	Putative Root phototropism protein 3
Cc02_g26470	GSCOC_T00024943001	-2.20298993220948	alpha/beta-Hydrolases superfamily protein
Cc00_g12190	GSCOC_T00012517001	-2.19854043931731	Elicitor-responsive protein 3
Cc06_g16420	GSCOC_T00030695001	-2.1946825263995	Putative Transcription factor bHLH60
Cc05_g11210	GSCOC_T00021344001	-2.19331520711043	Putative UDP-N-acetylglucosamine 1-carboxyvinyltransferase
Cc01_g14410	GSCOC_T00028439001	-2.19301768486405	Plant protein of unknown function (DUF828)
Cc01_g16450	GSCOC_T00016440001	-2.1912172930989	Putative Probable glucan endo-1,3-beta-glucosidase A6
Cc04_g02340	GSCOC_T00021905001	-2.19058330575005	Putative uncharacterized protein
Cc09_g06160	GSCOC_T00033352001	-2.18776136445215	Formate dehydrogenase, mitochondrial
Cc01_g13710	GSCOC_T00028348001	-2.18721681279539	Putative Mitochondrial uncoupling protein 3
Cc01_g13410	GSCOC_T00028307001	-2.18661001602223	Methylsterol monooxygenase 2-2
Cc08_g05750	GSCOC_T00024364001	-2.18540841456953	Hypothetical protein
Cc11_g00610	GSCOC_T00004222001	-2.18468142662767	Glyceraldehyde-3-phosphate dehydrogenase A, chloroplastic
Cc10_g06720	GSCOC_T00034619001	-2.18419970001205	Thylakoid lumenal 29 kDa protein, chloroplastic
Cc02_g29000	GSCOC_T00011527001	-2.1830064515912	Protein of unknown function (DUF288)
Cc10_g01910	GSCOC_T00024684001	-2.18174703139677	S-adenosyl-L-methionine-dependent methyltransferases superfamily protein
Cc04_g05780	GSCOC_T00022344001	-2.17941877999209	Rubredoxin-like superfamily protein
Cc07_g09500	GSCOC_T00037231001	-2.17834015518166	Putative Phosphatidylinositol transfer protein PDR16
Cc11_g09040	GSCOC_T00032795001	-2.17776306498759	unknown protein; FUNCTIONS IN
Cc09_g01650	GSCOC_T00017780001	-2.17518185015905	ATP synthase gamma chain, chloroplastic
Cc04_g09880	GSCOC_T00042519001	-2.17285825655942	Putative Heavy metal transport/detoxification superfamily protein
Cc06_g03030	GSCOC_T00023573001	-2.17283248184782	Putative Auxin-induced protein 5NG4
Cc01_g02440	GSCOC_T00009708001	-2.1712105463044	Serine carboxypeptidase-like 18
Cc03_g02000	GSCOC_T00025835001	-2.16922598140919	Probable protein phosphatase 2C 40
Cc00_g09090	GSCOC_T00012323001	-2.16901788116538	AGC kinase 1.7
Cc05_g08650	GSCOC_T00016892001	-2.16876221186017	NifU-like protein 3, chloroplastic
Cc05_g11580	GSCOC_T00021297001	-2.16867858713264	Putative Predicted protein
Cc02_g17970	GSCOC_T00014329001	-2.16676073437966	Protein TIC 62, chloroplastic
Cc02_g09090	GSCOC_T00029704001	-2.16475284223309	Putative C-Myc-binding protein homolog
Cc10_g06960	GSCOC_T00034591001	-2.16337412461765	UDP-glycosyltransferase 85A1
Cc06_g03980	GSCOC_T00023699001	-2.16049991311702	Phenylalanine ammonia-lyase
Cc11_g14050	GSCOC_T00032110001	-2.158843979338	Two-component response regulator ARR3
Cc00_g26060	GSCOC_T00003724001	-2.15711500187691	Heavy metal transport/detoxification superfamily protein
Cc04_g06390	GSCOC_T00022425001	-2.15635395658175	Peptidyl-prolyl cis-trans isomerase FKBP17-3, chloroplastic
Cc02_g09420	GSCOC_T00029657001	-2.15550078583133	INVOLVED IN
Cc08_g10880	GSCOC_T00027069001	-2.15497421181614	Cytokinin riboside 5'-monophosphate phosphoribohydrolase LOG8
Cc02_g03410	GSCOC_T00020225001	-2.15324274098168	TraB family protein
Cc05_g14870	GSCOC_T00038767001	-2.15220775311777	unknown protein; FUNCTIONS IN
Cc07_g07220	GSCOC_T00040061001	-2.15014612955827	Galactomannan galactosyltransferase 1
Cc07_g01970	GSCOC_T00039376001	-2.14939798870588	Phosphoenolpyruvate/phosphate translocator 2, chloroplastic
Cc06_g14580	GSCOC_T00041237001	-2.14876619802373	Putative Calcineurin subunit B
Cc05_g09520	GSCOC_T00021572001	-2.14778991746843	Pentatricopeptide repeat-containing protein At2g42920, chloroplastic
Cc07_g06510	GSCOC_T00039961001	-2.14554995758392	Putative Xyloglucan galactosyltransferase KATAMARI1 homolog
Cc03_g02540	GSCOC_T00025904001	-2.14368106035326	Probable 1-deoxy-D-xylulose-5-phosphate synthase, chloroplastic
Cc02_g34400	GSCOC_T00000681001	-2.1430259571359	Putative F-box/LRR-repeat protein 3
Cc10_g00640	GSCOC_T00024521001	-2.14238541997193	1,4-alpha-glucan-branching enzyme
Cc02_g25100	GSCOC_T00028794001	-2.14039370614404	Protein of unknown function (DUF630 and DUF632)
Cc07_g01190	GSCOC_T00019208001	-2.13982193312106	Putative Transcriptional factor B3
Cc00_g16610	GSCOC_T00013784001	-2.1359947423221	Arabinanase/levansucrase/invertase
Cc06_g02220	GSCOC_T00023470001	-2.12629746203228	CASP-like protein At3g53850
Cc04_g01440	GSCOC_T00021795001	-2.12543070111582	Putative unknown protein; BEST Arabidopsis thaliana protein match is
Cc02_g07500	GSCOC_T00029931001	-2.12533426228772	Ribulose bisphosphate carboxylase/oxygenase activase 1, chloroplastic
Cc03_g15980	GSCOC_T00001662001	-2.1252625470049	Outer envelope pore protein 37, chloroplastic
Cc07_g04180	GSCOC_T00039670001	-2.12520597899456	alpha/beta-Hydrolases superfamily protein
Cc06_g09080	GSCOC_T00041968001	-2.1247360619222	SOUL heme-binding family protein
Cc09_g03220	GSCOC_T00017577001	-2.12141502663249	Predicted protein
Cc02_g26410	GSCOC_T00028611001	-2.1212895579918	Putative Glutathione transferase GST 23
Cc00_g29860	GSCOC_T00006999001	-2.11723911328778	unknown protein; BEST Arabidopsis thaliana protein match is
Cc00_g12040	GSCOC_T00005331001	-2.11566811787262	Nitrate reductase [NADH]
Cc06_g05710	GSCOC_T00043135001	-2.11373422920422	Putative uncharacterized protein
Cc04_g05900	GSCOC_T00022362001	-2.111062455447	Putative Lysosomal alpha-mannosidase
Cc08_g15720	GSCOC_T00035513001	-2.1063539444603	Putative unknown protein; BEST Arabidopsis thaliana protein match is
Cc07_g14260	GSCOC_T00036637001	-2.10444123835305	Putative Probable mitochondrial 2-oxoglutarate/malate carrier protein
Cc01_g08500	GSCOC_T00023876001	-2.10290883274239	Aluminum-activated malate transporter 2
Cc04_g11190	GSCOC_T00037282001	-2.10177711831199	Cytochrome P450 71A1
Cc02_g14400	GSCOC_T00013848001	-2.10108928200735	IQ-domain 9
Cc02_g03340	GSCOC_T00020215001	-2.10102044930469	Putative uncharacterized protein
Cc02_g26830	GSCOC_T00024988001	-2.10013453308082	Putative Uncharacterized GPI-anchored protein At1g27950
Cc02_g32670	GSCOC_T00001209001	-2.09960977036445	UPF0603 protein At1g54780, chloroplastic
Cc02_g20780	GSCOC_T00014697001	-2.09935127958961	Putative glutamine amidotransferase YLR126C
Cc02_g38860	GSCOC_T00027800001	-2.09455202922715	Uncharacterized protein At4g01150, chloroplastic
Cc06_g02880	GSCOC_T00023554001	-2.0940199889041	Short-chain dehydrogenase TIC 32, chloroplastic
Cc07_g02430	GSCOC_T00039434001	-2.09280898105217	RING-H2 finger protein ATL46
Cc10_g01850	GSCOC_T00024674001	-2.09228101625806	ATP sulfurylase 2
Cc00_g08670	GSCOC_T00006865001	-2.09107047768049	unknown protein; FUNCTIONS IN
Cc07_g07940	GSCOC_T00040156001	-2.09023078020666	Serine hydroxymethyltransferase 1, mitochondrial
Cc02_g27410	GSCOC_T00025071001	-2.08945643465028	Histone H3.2
Cc07_g19780	GSCOC_T00033871001	-2.0887337063292	Predicted protein
Cc02_g35240	GSCOC_T00042878001	-2.08712634341733	Putative uncharacterized protein
Cc03_g05030	GSCOC_T00026240001	-2.08671013209319	Putative Cellulose synthase-like protein G1
Cc02_g19400	GSCOC_T00014506001	-2.08540508498634	Alpha-L-fucosidase 2
Cc06_g02340	GSCOC_T00023488001	-2.08515381107765	Putative uncharacterized protein
Cc07_g00250	GSCOC_T00019091001	-2.08377206330698	Putative Estradiol 17-beta-dehydrogenase 12
Cc01_g16760	GSCOC_T00016403001	-2.08177409886909	Oleoyl-acyl carrier protein thioesterase, chloroplastic (Fragment)
Cc10_g03310	GSCOC_T00024854001	-2.0815909269841	Geranylgeranyl pyrophosphate synthase, chloroplastic
Cc11_g12820	GSCOC_T00032264001	-2.08130815024005	RING/U-box superfamily protein
Cc08_g01260	GSCOC_T00038409001	-2.07891121445393	Putative uncharacterized protein
Cc02_g01190	GSCOC_T00019930001	-2.07786683265116	Protein yippee-like At4g27745
Cc09_g07580	GSCOC_T00036236001	-2.0751057946201	Tubulin beta-3 chain
Cc08_g05240	GSCOC_T00042427001	-2.07433010315339	Protein PAM68, chloroplastic
Cc07_g02370	GSCOC_T00039425001	-2.07147875298016	UDP-glycosyltransferase 90A1
Cc10_g08650	GSCOC_T00034362001	-2.06911273610173	Putative uncharacterized protein
Cc09_g02070	GSCOC_T00017724001	-2.0665552029883	Putative Tyrosine-specific transport protein
Cc10_g14740	GSCOC_T00033620001	-2.06626109005101	Fructose-1,6-bisphosphatase, cytosolic
Cc05_g05260	GSCOC_T00035089001	-2.0631357595726	Putative pterin-4-alpha-carbinolamine dehydratase
Cc01_g15720	GSCOC_T00016529001	-2.05943420624586	Putative uncharacterized protein
Cc07_g05400	GSCOC_T00039811001	-2.05863522341355	homolog of Synechocystis YCF37
Cc06_g22890	GSCOC_T00040654001	-2.0553872307495	NDH-dependent cyclic electron flow 1
Cc03_g05360	GSCOC_T00026285001	-2.05443719730332	Putative Auxin-induced protein 5NG4
Cc08_g01500	GSCOC_T00038376001	-2.04962826598396	Novel plant SNARE 11
Cc07_g05350	GSCOC_T00039805001	-2.04749313426674	Oxygen-evolving enhancer protein 1, chloroplastic
Cc04_g07650	GSCOC_T00022597001	-2.04616702843294	Cyclophilin-like peptidyl-prolyl cis-trans isomerase family protein
Cc06_g20220	GSCOC_T00022935001	-2.04598093537685	Probable nitrite transporter At1g68570
Cc01_g15700	GSCOC_T00016532001	-2.04471241546318	MLO-like protein 1
Cc03_g06400	GSCOC_T00026434001	-2.0436519868576	Auxin-responsive protein IAA13
Cc11_g11660	GSCOC_T00032417001	-2.04116096012535	Putative uncharacterized protein
Cc01_g17810	GSCOC_T00016279001	-2.04002458784146	Putative Tetratricopeptide repeat (TPR)-like superfamily protein
Cc05_g05150	GSCOC_T00035070001	-2.03766507570614	Cyclin-U1-1
Cc00_g23350	GSCOC_T00012066001	-2.03665733362487	Putative O-acyltransferase WSD1
Cc07_g10290	GSCOC_T00037136001	-2.03532190245349	Aldehyde dehydrogenase family 3 member F1
Cc01_g07360	GSCOC_T00030170001	-2.03018658073197	Molybdopterin synthase catalytic subunit
Cc04_g06510	GSCOC_T00022440001	-2.03015006367531	Hypothetical protein
Cc09_g07030	GSCOC_T00036326001	-2.02738489103668	Putative uncharacterized protein
Cc11_g11830	GSCOC_T00032393001	-2.0249826352312	Probable 6-phosphogluconolactonase 1
Cc04_g13030	GSCOC_T00011367001	-2.02407435103355	Putative unknown protein; FUNCTIONS IN
Cc00_g14590	GSCOC_T00012537001	-2.02352656264836	Rhodanese-like domain-containing protein 9, chloroplastic
Cc06_g16000	GSCOC_T00030748001	-2.02330181885715	Enoyl-[acyl-carrier-protein] reductase [NADH], chloroplastic
Cc04_g02640	GSCOC_T00021939001	-2.02288196849283	Putative BEST Arabidopsis thaliana protein match is
Cc07_g15090	GSCOC_T00036519001	-2.02170778158503	50S ribosomal protein L29, chloroplastic
Cc07_g02320	GSCOC_T00039418001	-2.02108007433027	Putative Serine/threonine-protein kinase HT1
Cc02_g12370	GSCOC_T00029291001	-2.02025627248297	ARM repeat superfamily protein
Cc08_g13580	GSCOC_T00030326001	-2.01971063172765	Probable sugar phosphate/phosphate translocator At1g12500
Cc03_g01570	GSCOC_T00025772001	-2.01878082279589	Putative Epoxide hydrolase 2
Cc08_g07730	GSCOC_T00011861001	-2.01807722931783	Hypothetical protein
Cc02_g33050	GSCOC_T00016746001	-2.01729397857938	Putative GDSL esterase/lipase 5
Cc05_g12730	GSCOC_T00021152001	-2.01638043480281	Cyclic nucleotide-gated ion channel 4
Cc11_g15820	GSCOC_T00038104001	-2.0160864613322	Hypothetical protein
Cc02_g19210	GSCOC_T00014485001	-2.01596734203641	Probable carbohydrate esterase At4g34215
Cc10_g07600	GSCOC_T00034501001	-2.01367786899279	Putative uncharacterized protein
Cc10_g13250	GSCOC_T00035321001	-2.00892827512728	ACT domain repeat 3
Cc09_g00530	GSCOC_T00017935001	-2.00545303719925	Putative Uncharacterized protein
Cc05_g08160	GSCOC_T00016828001	-2.00490776449273	Predicted protein
Cc02_g00810	GSCOC_T00019878001	-2.00406922100444	Late embryogenesis abundant (LEA) hydroxyproline-rich glycoprotein family
Cc04_g16320	GSCOC_T00035718001	-1.99465025457696	NDH dependent flow 6
Cc07_g03280	GSCOC_T00039554001	-1.99387995055975	Putative Transcription factor bHLH47
Cc04_g08070	GSCOC_T00022655001	-1.99354354426589	Tropinone reductase homolog At1g07440
Cc07_g10170	GSCOC_T00037152001	-1.99339984975137	3-epi-6-deoxocathasterone 23-monooxygenase
Cc02_g21030	GSCOC_T00014735001	-1.99323744701441	Root phototropism protein 3
Cc03_g01090	GSCOC_T00025712001	-1.9911854531912	cAMP-regulated phosphoprotein 19-related protein
Cc07_g04030	GSCOC_T00039653001	-1.99112170136596	Alpha-1,4 glucan phosphorylase L-1 isozyme, chloroplastic/amyloplastic
Cc00_g32770	GSCOC_T00009826001	-1.99043913586053	Heterodimeric geranylgeranyl pyrophosphate synthase small subunit, chloroplastic
Cc11_g01580	GSCOC_T00019547001	-1.98760674948108	Putative uncharacterized protein
Cc05_g12860	GSCOC_T00021133001	-1.98629993493332	G-type lectin S-receptor-like serine/threonine-protein kinase At4g27290
Cc07_g07790	GSCOC_T00040139001	-1.98467683500857	Uncharacterized protein At5g65660
Cc08_g09830	GSCOC_T00026935001	-1.98413845237637	Putative Lachrymatory-factor synthase
Cc02_g10560	GSCOC_T00029516001	-1.98394975549294	Protein of unknown function (DUF1997)
Cc07_g11750	GSCOC_T00036964001	-1.98186686368344	Undecaprenyl diphosphate synthase, putative
Cc06_g00740	GSCOC_T00023273001	-1.98119681489139	Putative Macrophage migration inhibitory factor homolog
Cc10_g13090	GSCOC_T00035340001	-1.98118147278581	Bidirectional sugar transporter SWEET1
Cc02_g19420	GSCOC_T00014508001	-1.97985479924392	Putative uncharacterized protein
Cc00_g16360	GSCOC_T00012375001	-1.97778893260793	Metal transporter Nramp1
Cc06_g03970	GSCOC_T00023698001	-1.97619879840292	29 kDa ribonucleoprotein A, chloroplastic
Cc07_g07230	GSCOC_T00040063001	-1.97554922435152	Glycosyltransferase 6
Cc06_g22810	GSCOC_T00040665001	-1.97547932192126	Putative 50S ribosomal protein 5 alpha, chloroplastic
Cc00_g04330	GSCOC_T00010986001	-1.97321324016525	Miraculin
Cc02_g36400	GSCOC_T00003928001	-1.97009907171686	Cytochrome P450 76C4
Cc05_g06470	GSCOC_T00042137001	-1.96937928519828	Putative Formimidoyltransferase-cyclodeaminase
Cc11_g13710	GSCOC_T00032148001	-1.96931454926908	Glutathione S-transferase U17
Cc03_g07240	GSCOC_T00026568001	-1.96553385936794	Purple acid phosphatase 23
Cc01_g14040	GSCOC_T00028391001	-1.96093356679209	Tetratricopeptide repeat (TPR)-like superfamily protein
Cc07_g11600	GSCOC_T00036983001	-1.95699296833682	MATE efflux family protein 3, chloroplastic
Cc02_g38380	GSCOC_T00027871001	-1.9568333640004	Ferric reduction oxidase 2
Cc01_g12770	GSCOC_T00028226001	-1.95431847844969	Actin-11
Cc07_g12290	GSCOC_T00036895001	-1.95211091553195	Auxin efflux carrier family protein
Cc02_g06640	GSCOC_T00039206001	-1.94905118367919	Protein yippee-like
Cc00_g12470	GSCOC_T00005354001	-1.94896597344437	Putative Probable flavonol synthase 5
Cc04_g04490	GSCOC_T00022174001	-1.94820377547043	Putative uncharacterized protein
Cc07_g04240	GSCOC_T00039676001	-1.94692255478346	Putative chlororespiratory reduction 7
Cc02_g06580	GSCOC_T00039200001	-1.94639910311101	GDSL esterase/lipase CPRD49
Cc05_g15430	GSCOC_T00038693001	-1.94549427390838	Fructose-bisphosphate aldolase, cytoplasmic isozyme 1
Cc02_g16580	GSCOC_T00014151001	-1.94534280643699	Plant neutral invertase family protein
Cc01_g11930	GSCOC_T00028109001	-1.94387907209582	Phototropin-1
Cc02_g19180	GSCOC_T00014482001	-1.94281123476022	stress enhanced protein 1
Cc01_g10590	GSCOC_T00024158001	-1.93635543047452	ABC transporter G family member 3
Cc08_g02620	GSCOC_T00037740001	-1.9362976285949	unknown protein; FUNCTIONS IN
Cc04_g04380	GSCOC_T00022162001	-1.93282432541277	Palmitoyl-monogalactosyldiacylglycerol delta-7 desaturase, chloroplastic
Cc05_g15930	GSCOC_T00038624001	-1.93201475674746	Photosystem II 10 kDa polypeptide, chloroplastic
Cc00_g22310	GSCOC_T00013343001	-1.93158935487424	Squalene synthase
Cc07_g14870	GSCOC_T00036559001	-1.92767535839723	Putative Protein CbbY
Cc05_g00060	GSCOC_T00017022001	-1.92557716370812	Scarecrow-like protein 23
Cc01_g21350	GSCOC_T00004990001	-1.92139920903727	Putative RING/FYVE/PHD zinc finger superfamily protein
Cc07_g03860	GSCOC_T00039633001	-1.92116935978338	Cyclic nucleotide-gated ion channel 2
Cc04_g08280	GSCOC_T00022683001	-1.92065033362015	Putative movement protein binding protein 2C
Cc06_g04460	GSCOC_T00042955001	-1.91950207971461	unknown protein; FUNCTIONS IN
Cc00_g00160	GSCOC_T00036092001	-1.91938332331476	Putative Protein of unknown function (DUF581)
Cc06_g11320	GSCOC_T00041672001	-1.9191475358444	Alkaline-phosphatase-like family protein
Cc00_g21350	GSCOC_T00011618001	-1.91772888771441	Putative Vacuolar amino acid transporter 1
Cc06_g21650	GSCOC_T00015553001	-1.91593352486229	Protein of unknown function (DUF630 and DUF632)
Cc03_g09470	GSCOC_T00030925001	-1.91558867151898	Hypothetical protein
Cc02_g19720	GSCOC_T00014546001	-1.91356400051941	LOB domain-containing protein, putative
Cc02_g01650	GSCOC_T00019993001	-1.91267897611507	CCT motif family protein
Cc02_g17640	GSCOC_T00014284001	-1.91230513331392	Mitochondrial transcription termination factor family protein
Cc11_g14920	GSCOC_T00001042001	-1.9057077508096	Uncharacterized protein At4g14100
Cc01_g07240	GSCOC_T00030156001	-1.90471190202636	Putative 1-aminocyclopropane-1-carboxylate oxidase homolog 12
Cc05_g12430	GSCOC_T00021192001	-1.90339957105669	Putative uncharacterized protein
Cc09_g03800	GSCOC_T00017501001	-1.90232057710281	Thioredoxin F, chloroplastic
Cc09_g07140	GSCOC_T00036309001	-1.90132807175124	Putative Probable ribose-5-phosphate isomerase
Cc10_g07920	GSCOC_T00034463001	-1.9012770343011	Ergosterol biosynthetic protein 28
Cc02_g26950	GSCOC_T00025006001	-1.89995230776263	Hypothetical protein
Cc07_g08550	GSCOC_T00040232001	-1.89605326738879	Probable non-specific lipid-transfer protein AKCS9
Cc07_g02040	GSCOC_T00039384001	-1.89575950132784	50S ribosomal protein L12, chloroplastic
Cc08_g01180	GSCOC_T00038422001	-1.89415611673533	Cytokinin dehydrogenase 7
Cc01_g15590	GSCOC_T00016544001	-1.89319653664721	50S ribosomal protein L17, chloroplastic
Cc08_g15900	GSCOC_T00035534001	-1.89117685674857	Putative uncharacterized protein
Cc10_g09340	GSCOC_T00031558001	-1.89031749041768	12-oxophytodienoate reductase 2
Cc07_g00480	GSCOC_T00019120001	-1.88856601373632	Mitochondrial ribosomal protein L37
Cc09_g04120	GSCOC_T00017465001	-1.88792374623868	Acyl-[acyl-carrier-protein] desaturase, chloroplastic
Cc04_g13640	GSCOC_T00003540001	-1.88705822582107	50S ribosomal protein L18, chloroplastic
Cc06_g02160	GSCOC_T00023463001	-1.88319459664338	reticulata-related 1
Cc07_g05880	GSCOC_T00039874001	-1.88299828640411	Putative Patatin group A-3
Cc04_g10850	GSCOC_T00042658001	-1.88151694883374	Abhydrolase domain-containing protein FAM108C1
Cc04_g05520	GSCOC_T00022311001	-1.88130873843698	Unknown protein DS12 from 2D-PAGE of leaf, chloroplastic
Cc02_g22810	GSCOC_T00014959001	-1.88101978032698	Ferredoxin, chloroplastic
Cc09_g10620	GSCOC_T00041022001	-1.87691596818898	Putative LysM domain-containing GPI-anchored protein 2
Cc02_g16920	GSCOC_T00014194001	-1.87571257086975	ATP binding microtubule motor family protein
Cc09_g07970	GSCOC_T00003785001	-1.87404636456374	Putative Lysosomal alpha-mannosidase
Cc05_g03390	GSCOC_T00033551001	-1.87184097202332	Hypothetical protein
Cc00_g03400	GSCOC_T00012866001	-1.87119826041644	Protein SPIRAL1-like 1
Cc08_g03960	GSCOC_T00034196001	-1.87105725867234	Phosphoribulokinase, chloroplastic
Cc08_g16130	GSCOC_T00035564001	-1.87030968580044	Nucleoside diphosphate kinase IV, chloroplastic/mitochondrial
Cc11_g15800	GSCOC_T00038100001	-1.86430315181384	BTB/POZ domain-containing protein At1g67900
Cc08_g08350	GSCOC_T00007231001	-1.86233454166495	Serine/threonine protein phosphatase 2A 57 kDa regulatory subunit B' iota isoform
Cc04_g04320	GSCOC_T00022156001	-1.86076502709299	Putative Tetratricopeptide repeat (TPR)-like superfamily protein
Cc02_g11650	GSCOC_T00029385001	-1.86051858667229	Thiamine thiazole synthase 2, chloroplastic
Cc05_g10170	GSCOC_T00021493001	-1.85909387441688	Peroxisomal (S)-2-hydroxy-acid oxidase
Cc07_g13990	GSCOC_T00036669001	-1.8575034640591	Receptor-like cytosolic serine/threonine-protein kinase RBK1
Cc00_g24600	GSCOC_T00007002001	-1.85647228780472	Probable steroid-binding protein 3
Cc11_g01610	GSCOC_T00019541001	-1.8563813052009	Putative uncharacterized protein
Cc01_g08020	GSCOC_T00015489001	-1.85148553742375	thylakoid lumenal P17.1 protein
Cc02_g35270	GSCOC_T00042873001	-1.84959816236676	Protein of unknown function, DUF538
Cc01_g12450	GSCOC_T00028181001	-1.84936755510446	Actin-depolymerizing factor 1
Cc01_g03610	GSCOC_T00033080001	-1.84845532693089	Callose synthase 3
Cc03_g07620	GSCOC_T00026617001	-1.84688704879906	Putative plastid transcriptionally active 5
Cc07_g00790	GSCOC_T00019158001	-1.84650733191425	Sulfite oxidase
Cc05_g10670	GSCOC_T00021410001	-1.84629021909172	Alpha,alpha-trehalose-phosphate synthase [UDP-forming] 1
Cc02_g39400	GSCOC_T00027722001	-1.84227054990352	Putative Uncharacterized membrane protein yuiD
Cc06_g13130	GSCOC_T00041441001	-1.83756842036371	Protein kinase superfamily protein
Cc04_g11490	GSCOC_T00037338001	-1.83751912539754	Putative unknown protein; Has 20 Blast hits to 20 proteins in 7 species
Cc07_g19080	GSCOC_T00018643001	-1.83722240509351	Predicted protein
Cc05_g08440	GSCOC_T00016866001	-1.8357596677698	Phospholipase A1-IIdelta
Cc11_g01180	GSCOC_T00019614001	-1.83574863948939	Putative UDP-rhamnose
Cc04_g04850	GSCOC_T00022224001	-1.8353663880077	Probable receptor-like protein kinase At1g80640
Cc02_g03300	GSCOC_T00020209001	-1.8351526667428	Putative IQ-domain 22
Cc11_g16160	GSCOC_T00038149001	-1.83514276794022	Oxysterol-binding protein-related protein 1D
Cc02_g34500	GSCOC_T00000699001	-1.8323127008624	Tetratricopeptide repeat (TPR)-like superfamily protein
Cc11_g15110	GSCOC_T00001014001	-1.83224907309737	Predicted protein
Cc09_g04180	GSCOC_T00017458001	-1.82822835096405	2-succinylbenzoate--CoA ligase, chloroplastic/peroxisomal
Cc05_g00600	GSCOC_T00017100001	-1.82652101819001	Putative RING/U-box superfamily protein
Cc04_g02830	GSCOC_T00021964001	-1.82053755875406	NDH-dependent cyclic electron flow 1
Cc07_g00870	GSCOC_T00019168001	-1.81952361218306	50S ribosomal protein L27, chloroplastic
Cc10_g01790	GSCOC_T00024666001	-1.81752936224691	Protein disulfide-isomerase LQY1
Cc02_g21250	GSCOC_T00014762001	-1.81675245511454	Putative Probable 1,4-dihydroxy-2-naphthoate octaprenyltransferase
Cc08_g14040	GSCOC_T00030272001	-1.81513954955907	F-box protein PP2-A12
Cc05_g12570	GSCOC_T00021173001	-1.81394307257379	unknown protein; BEST Arabidopsis thaliana protein match is
Cc06_g08310	GSCOC_T00031148001	-1.81110447868624	Axial regulator YABBY 5
Cc07_g10740	GSCOC_T00037080001	-1.80947443564842	Naringenin,2-oxoglutarate 3-dioxygenase (Fragment)
Cc11_g17290	GSCOC_T00038291001	-1.8065149044252	Peptidyl-prolyl cis-trans isomerase CYP20-2, chloroplastic
Cc02_g34060	GSCOC_T00000637001	-1.80613874461743	Putative Transcription factor bHLH19
Cc11_g17480	GSCOC_T00038320001	-1.80552485802833	Somatic embryogenesis receptor kinase 1
Cc05_g12670	GSCOC_T00021160001	-1.80266585300514	Cytochrome c-type biogenesis ccda-like chloroplastic protein 2
Cc04_g06110	GSCOC_T00022392001	-1.80217910502435	unknown protein; FUNCTIONS IN
Cc04_g00340	GSCOC_T00021638001	-1.80212377697192	O-fucosyltransferase family protein
Cc07_g02540	GSCOC_T00039452001	-1.80108207243014	Putative Heavy metal transport/detoxification superfamily protein
Cc07_g12660	GSCOC_T00036846001	-1.79692924869445	Putative Intracellular protease 1
Cc06_g05140	GSCOC_T00043047001	-1.79503202603138	Peroxiredoxin-2E, chloroplastic
Cc05_g09740	GSCOC_T00021545001	-1.79392903717979	3-hydroxyisobutyryl-CoA hydrolase-like protein 5
Cc05_g09950	GSCOC_T00021520001	-1.79350791502996	Putative uncharacterized protein
Cc10_g03230	GSCOC_T00024846001	-1.79343962844397	PPPDE putative thiol peptidase family protein
Cc02_g35850	GSCOC_T00042782001	-1.79103658919904	unknown protein; Has 29 Blast hits to 29 proteins in 11 species
Cc02_g24580	GSCOC_T00028866001	-1.78818489736013	Probable plastid-lipid-associated protein 11, chloroplastic
Cc09_g09670	GSCOC_T00004089001	-1.78580983800632	S-adenosyl-L-methionine-dependent methyltransferases superfamily protein
Cc04_g15610	GSCOC_T00042334001	-1.78000046634024	Integral membrane HPP family protein
Cc01_g14360	GSCOC_T00028434001	-1.77981510887916	Putative Probable NADH dehydrogenase
Cc08_g07790	GSCOC_T00011873001	-1.77557307042773	3-ketoacyl-CoA synthase 10
Cc07_g06900	GSCOC_T00040019001	-1.77447504963555	LOB domain-containing protein 38
Cc01_g16060	GSCOC_T00016486001	-1.77193655668893	Serine carboxypeptidase 1
Cc07_g07650	GSCOC_T00040119001	-1.7707600310113	Leucine-rich repeat receptor-like serine/threonine-protein kinase BAM1
Cc06_g05700	GSCOC_T00043134001	-1.77029372264404	Cell division protein FtsZ homolog 2-2, chloroplastic
Cc02_g23910	GSCOC_T00015096001	-1.76558868141091	Putative Dihydroflavonol-4-reductase
Cc06_g08500	GSCOC_T00031124001	-1.76016918701891	DnaJ/Hsp40 cysteine-rich domain superfamily protein
Cc10_g04440	GSCOC_T00034934001	-1.75662615630083	Putative Patatin group A-3
Cc02_g32710	GSCOC_T00001204001	-1.75408129444508	Branched-chain-amino-acid aminotransferase-like protein 2
Cc09_g00480	GSCOC_T00017944001	-1.75388374339242	Pentatricopeptide repeat-containing protein At4g16390, chloroplastic
Cc00_g15490	GSCOC_T00000734001	-1.75368413564781	unknown protein; FUNCTIONS IN
Cc02_g00440	GSCOC_T00019824001	-1.75074516891654	rubredoxin family protein
Cc09_g08040	GSCOC_T00003802001	-1.74673740987597	Homeobox-leucine zipper protein HOX32
Cc02_g17060	GSCOC_T00014210001	-1.74614241767842	Kinesin motor family protein
Cc07_g08680	GSCOC_T00040254001	-1.74476158573607	Delta(7)-sterol-C5(6)-desaturase
Cc02_g14500	GSCOC_T00013861001	-1.74402834926902	Hexose carrier protein HEX6
Cc03_g05900	GSCOC_T00026362001	-1.74329574499947	50S ribosomal protein L28, chloroplastic
Cc03_g16290	GSCOC_T00002098001	-1.74316725193982	50S ribosomal protein L6, chloroplastic
Cc08_g00920	GSCOC_T00038450001	-1.73893885358678	Cellulose synthase A catalytic subunit 1 [UDP-forming]
Cc02_g10400	GSCOC_T00029533001	-1.73872812590386	Putative Bark storage protein A
Cc11_g12760	GSCOC_T00032273001	-1.73726189288958	PsbQ-like 2
Cc01_g20370	GSCOC_T00015941001	-1.73408845706538	Glutaredoxin-C13
Cc00_g03730	GSCOC_T00013259001	-1.73022426002062	Protein SRG1
Cc11_g05880	GSCOC_T00020563001	-1.72888011993115	Anthranilate synthase component II
Cc08_g13340	GSCOC_T00030355001	-1.72778586491949	Methylsterol monooxygenase 1-1
Cc06_g09180	GSCOC_T00041948001	-1.7251310395169	Putative Uncharacterized sodium-dependent transporter yocS
Cc08_g00530	GSCOC_T00038504001	-1.72308872338218	ATP synthase subunit b', chloroplastic
Cc02_g31060	GSCOC_T00011097001	-1.72092773634338	Photosystem II reaction center PsbP family protein
Cc01_g17560	GSCOC_T00016307001	-1.72014559081213	Hypothetical protein
Cc02_g11740	GSCOC_T00029376001	-1.71968204091991	Sulfite exporter TauE/SafE family protein
Cc08_g14140	GSCOC_T00030261001	-1.71499804605397	60S ribosomal protein L24-1
Cc06_g21080	GSCOC_T00034088001	-1.71314984422093	Putative uncharacterized protein
Cc02_g39450	GSCOC_T00027714001	-1.71304992554605	Putative Protein ASPARTIC PROTEASE IN GUARD CELL 1
Cc02_g03480	GSCOC_T00020233001	-1.71299730703811	Protein of unknown function (DUF565)
Cc02_g08570	GSCOC_T00029776001	-1.70770640156682	Chalcone--flavonone isomerase
Cc04_g11180	GSCOC_T00037281001	-1.70524125268759	Rhodanese-like domain-containing protein 11, chloroplastic
Cc06_g20300	GSCOC_T00022952001	-1.70317245929503	Peptidyl-prolyl cis-trans isomerase FKBP65
Cc09_g02380	GSCOC_T00017685001	-1.70132959591537	50S ribosomal protein L10, chloroplastic
Cc05_g06070	GSCOC_T00035214001	-1.69880944380907	Protein THYLAKOID FORMATION1, chloroplastic
Cc02_g16100	GSCOC_T00014085001	-1.69857054785507	Integrin-linked protein kinase family
Cc09_g09300	GSCOC_T00023067001	-1.69670038993999	Mitochondrial carnitine/acylcarnitine carrier-like protein
Cc11_g01870	GSCOC_T00019498001	-1.69474876560402	Putative Acyl-protein thioesterase 1 homolog 1
Cc07_g07770	GSCOC_T00040137001	-1.69448198634692	Putative Zinc finger (C3HC4-type RING finger) family protein
Cc11_g08840	GSCOC_T00032820001	-1.69029593124299	Uncharacterized lipoprotein syc1174_c
Cc09_g04450	GSCOC_T00017424001	-1.69024428810233	Coproporphyrinogen-III oxidase, chloroplastic
Cc07_g10950	GSCOC_T00037055001	-1.68817017554923	Putative Lysosomal alpha-mannosidase
Cc11_g14950	GSCOC_T00001038001	-1.68806706091719	Peptidyl-prolyl cis-trans isomerase
Cc01_g04960	GSCOC_T00028573001	-1.6872846623591	ABC transporter G family member 15
Cc10_g13070	GSCOC_T00035347001	-1.68605876984333	Putative Cyanidin-3-O-glucoside 2-O-glucuronosyltransferase
Cc10_g06760	GSCOC_T00034615001	-1.68519034710599	Alcohol dehydrogenase-like 1
Cc11_g14480	GSCOC_T00032053001	-1.68200821331764	Potassium transporter 6
Cc04_g16160	GSCOC_T00042408001	-1.68149976575496	Putative Microtubule-associated protein TORTIFOLIA1
Cc08_g13470	GSCOC_T00030341001	-1.67920407627448	Armadillo repeat-containing kinesin-like protein 3
Cc01_g01550	GSCOC_T00037891001	-1.67455797077029	Putative uncharacterized protein
Cc07_g14530	GSCOC_T00036605001	-1.67277653075561	Putative uncharacterized protein
Cc11_g16580	GSCOC_T00038198001	-1.66865833335799	3-oxoacyl-[acyl-carrier-protein] reductase, chloroplastic
Cc07_g03580	GSCOC_T00039598001	-1.66415453810237	myb domain protein 16
Cc07_g18500	GSCOC_T00018744001	-1.66365326650246	Magnesium-chelatase subunit chlI, chloroplastic
Cc01_g15420	GSCOC_T00016562001	-1.66317660155929	Probable LRR receptor-like serine/threonine-protein kinase At1g06840
Cc09_g10170	GSCOC_T00041081001	-1.66299232269699	Glycerate dehydrogenase
Cc07_g05850	GSCOC_T00039868001	-1.66282158067764	Protein of unknown function, DUF547
Cc07_g05370	GSCOC_T00039808001	-1.66277861714488	BTB/POZ domain-containing protein At5g66560
Cc02_g21710	GSCOC_T00014816001	-1.66201283674591	(3R)-hydroxymyristoyl-[acyl-carrier-protein] dehydratase
Cc02_g19860	GSCOC_T00014562001	-1.65926267280004	Predicted protein
Cc06_g07440	GSCOC_T00031260001	-1.65912986940353	Putative RING/U-box superfamily protein
Cc01_g18770	GSCOC_T00016157001	-1.65533570522207	Magnesium transporter MRS2-I
Cc05_g08090	GSCOC_T00016820001	-1.65418056361386	Putative Uncharacterized protein HI_0077
Cc01_g09970	GSCOC_T00024074001	-1.65201999036987	Putative Bifunctional polymyxin resistance protein ArnA
Cc04_g01400	GSCOC_T00021790001	-1.65066178642842	NAD(P)-binding Rossmann-fold superfamily protein
Cc01_g15580	GSCOC_T00016545001	-1.65018477188442	Putative uncharacterized protein
Cc08_g03980	GSCOC_T00034198001	-1.64877308199744	membrane protein, putative
Cc07_g15560	GSCOC_T00036460001	-1.64828411228385	Bifunctional aspartate aminotransferase and glutamate/aspartate-prephenate aminotransferase
Cc04_g08540	GSCOC_T00022716001	-1.64518050356232	Putative uncharacterized protein
Cc03_g05040	GSCOC_T00026241001	-1.64486120143213	Putative Cellulose synthase-like protein G2
Cc09_g02170	GSCOC_T00017710001	-1.64412304850748	Aquaporin PIP2-1
Cc01_g07450	GSCOC_T00030183001	-1.6438404759693	Putative uncharacterized protein
Cc10_g05010	GSCOC_T00034863001	-1.64054536040224	Pollen-specific protein SF3
Cc07_g08070	GSCOC_T00040169001	-1.63992656908929	Probable fructokinase-4
Cc03_g08930	GSCOC_T00042746001	-1.63961617935814	Hypothetical protein
Cc01_g21430	GSCOC_T00004981001	-1.63838860704613	Calvin cycle protein CP12-2, chloroplastic
Cc01_g21210	GSCOC_T00005007001	-1.63741008984142	Putative unknown protein; BEST Arabidopsis thaliana protein match is
Cc04_g09430	GSCOC_T00022831001	-1.63613769828122	Probable plastid-lipid-associated protein 8, chloroplastic
Cc02_g01400	GSCOC_T00019963001	-1.63539494443175	Protein ABIL3
Cc10_g01440	GSCOC_T00024615001	-1.6344215168554	ABC transporter B family member 13
Cc07_g14970	GSCOC_T00036547001	-1.63426273862352	Putative membrane lipoprotein
Cc07_g20230	GSCOC_T00016983001	-1.63367815301769	Hypothetical protein
Cc02_g22710	GSCOC_T00014948001	-1.63035489135637	Potassium channel AKT2/3
Cc02_g38130	GSCOC_T00027903001	-1.630270916288	Glycerol-3-phosphate acyltransferase 4
Cc04_g05830	GSCOC_T00022350001	-1.6302310736025	Glycine--tRNA ligase 1, mitochondrial
Cc10_g00260	GSCOC_T00024474001	-1.6281994970307	PsbP domain-containing protein 3, chloroplastic
Cc03_g02560	GSCOC_T00025909001	-1.62780303986742	NADH dehydrogenase [ubiquinone] 1 alpha subcomplex subunit 8-B
Cc00_g08890	GSCOC_T00007806001	-1.62701367932241	Endonuclease, putative
Cc01_g00990	GSCOC_T00038001001	-1.62622376923035	Putative uncharacterized protein
Cc02_g31610	GSCOC_T00027522001	-1.6259265361576	unknown protein; FUNCTIONS IN
Cc06_g18930	GSCOC_T00028932001	-1.62455454615634	Putative Strictosidine synthase 1
Cc07_g18510	GSCOC_T00018743001	-1.62450405138477	ABC transporter I family member 10, chloroplastic
Cc02_g13860	GSCOC_T00029087001	-1.6191681308297	Triose phosphate/phosphate translocator, chloroplastic
Cc09_g08850	GSCOC_T00023158001	-1.61703060892748	Putative Uncharacterized protein ycf23
Cc05_g09290	GSCOC_T00002649001	-1.61497685924111	Mitochondrial transcription termination factor family protein
Cc07_g09280	GSCOC_T00040326001	-1.61433921648014	Outer envelope pore protein 24, chloroplastic
Cc08_g09170	GSCOC_T00017260001	-1.61239971495485	alpha/beta-Hydrolases superfamily protein
Cc06_g01310	GSCOC_T00023346001	-1.6122187757137	Rhodanese-like domain-containing protein 10
Cc07_g08970	GSCOC_T00040289001	-1.61166557568153	Putative Rhomboid-related intramembrane serine protease family protein
Cc02_g04310	GSCOC_T00020342001	-1.60998726651568	Peroxisomal membrane protein 11-4
Cc07_g11080	GSCOC_T00037041001	-1.60942294052114	Ubiquitin-conjugating enzyme E2 28
Cc02_g39740	GSCOC_T00027675001	-1.60790200824091	unknown protein; FUNCTIONS IN
Cc06_g14490	GSCOC_T00041250001	-1.60729839303454	50S ribosomal protein L35
Cc04_g10280	GSCOC_T00042573001	-1.60648497707745	Putative Uncharacterized aarF domain-containing protein kinase 1
Cc05_g16040	GSCOC_T00038612001	-1.60630551522548	GTP-dependent nucleic acid-binding protein engD
Cc03_g05800	GSCOC_T00026349001	-1.60570023267382	Long-chain-alcohol oxidase FAO1
Cc06_g11150	GSCOC_T00041692001	-1.60427272155618	Pentatricopeptide repeat-containing protein At2g15690
Cc07_g05910	GSCOC_T00039878001	-1.60389149606205	Putative uncharacterized protein
Cc08_g05140	GSCOC_T00042443001	-1.60387738354867	Plant protein of unknown function (DUF946)
Cc02_g08640	GSCOC_T00029767001	-1.60346100965514	unknown protein; LOCATED IN
Cc05_g11020	GSCOC_T00021368001	-1.60010749699608	Hypothetical protein
Cc04_g03040	GSCOC_T00021991001	-1.59778596941658	30S ribosomal protein S17, chloroplastic
Cc07_g11460	GSCOC_T00036999001	-1.59702312109806	SEC14 cytosolic factor family protein / phosphoglyceride transfer family protein
Cc05_g00330	GSCOC_T00017061001	-1.59623059182457	Putative Patatin group A-3
Cc11_g03140	GSCOC_T00025462001	-1.59556543829009	Putative UDP-glycosyltransferase 76E1
Cc00_g09800	GSCOC_T00004629001	-1.59535056574577	proline-rich family protein
Cc00_g20570	GSCOC_T00008769001	-1.59527488268119	Putative Peptidase S14, ClpP
Cc06_g04570	GSCOC_T00042969001	-1.59492053665378	Phosphatidylinositol 4-phosphate 5-kinase 9
Cc02_g38520	GSCOC_T00027853001	-1.59410059081702	Putative Heavy metal transport/detoxification superfamily protein
Cc03_g03810	GSCOC_T00026081001	-1.59132099233623	Putative Ferredoxin-1
Cc05_g10620	GSCOC_T00021418001	-1.58983961131738	Putative Uncharacterized sodium-dependent transporter yocS
Cc07_g14880	GSCOC_T00036558001	-1.58785806263616	UDP-glycosyltransferase 85A1
Cc02_g18920	GSCOC_T00014452001	-1.58435740739264	PI-PLC X domain-containing protein At5g67130
Cc05_g09010	GSCOC_T00002682001	-1.58003471833243	Putative alpha-crystallin domain 32.1
Cc01_g07890	GSCOC_T00015467001	-1.57862079123463	Molybdopterin biosynthesis protein CNX1
Cc03_g07100	GSCOC_T00026547001	-1.57675616177987	GDT1-like protein 2, chloroplastic
Cc01_g13360	GSCOC_T00028301001	-1.57655290082717	plastid transcriptionally active 16
Cc07_g00640	GSCOC_T00019142001	-1.5764035401314	FUNCTIONS IN
Cc04_g10930	GSCOC_T00042671001	-1.57328529620993	28 kDa ribonucleoprotein, chloroplastic
Cc06_g11990	GSCOC_T00041588001	-1.57217916582993	Stress responsive alpha-beta barrel domain protein
Cc10_g02260	GSCOC_T00024725001	-1.57204348785937	Purple acid phosphatase
Cc08_g15950	GSCOC_T00035541001	-1.57147067730447	Probable polygalacturonase
Cc11_g10360	GSCOC_T00032588001	-1.57005105484862	30S ribosomal protein 3, chloroplastic
Cc02_g39080	GSCOC_T00027767001	-1.5690461038776	TRICHOME BIREFRINGENCE-LIKE 25
Cc01_g02460	GSCOC_T00009701001	-1.56438863429362	F-box/kelch-repeat protein At1g55270
Cc06_g12480	GSCOC_T00041532001	-1.56269141734764	Chlorophyll a-b binding protein, chloroplastic
Cc02_g35130	GSCOC_T00012343001	-1.5619286602962	PsbP domain-containing protein 1, chloroplastic
Cc05_g12540	GSCOC_T00021178001	-1.56009316819924	Peptidyl-prolyl cis-trans isomerase CYP37, chloroplastic
Cc11_g16310	GSCOC_T00038167001	-1.55953533994993	Probable LRR receptor-like serine/threonine-protein kinase At1g67720
Cc02_g04200	GSCOC_T00020327001	-1.55642473631994	Putative BAG family molecular chaperone regulator 7
Cc01_g05880	GSCOC_T00027415001	-1.55591472793612	Putative Uncharacterized protein At2g37660, chloroplastic
Cc04_g02080	GSCOC_T00021875001	-1.55481529285849	RNA-binding (RRM/RBD/RNP motifs) family protein
Cc11_g00360	GSCOC_T00019472001	-1.55468416878937	Pyruvate kinase, cytosolic isozyme
Cc08_g00650	GSCOC_T00038486001	-1.55144818079932	Putative uncharacterized protein
Cc02_g11930	GSCOC_T00029355001	-1.55091614935559	Putative uncharacterized protein
Cc02_g30610	GSCOC_T00023793001	-1.55046792682619	Putative UDP-XYL synthase 5
Cc10_g16240	GSCOC_T00033841001	-1.54863029553863	RmlC-like cupins superfamily protein
Cc01_g09830	GSCOC_T00024052001	-1.54605031797302	MORN (Membrane Occupation and Recognition Nexus) repeat-containing protein
Cc06_g14520	GSCOC_T00041247001	-1.54567695804125	Serine carboxypeptidase-like 29
Cc02_g30730	GSCOC_T00023815001	-1.54149841134457	Auxin-responsive protein IAA16
Cc02_g34520	GSCOC_T00000703001	-1.5405010698715	Probable protein phosphatase 2C 73
Cc01_g03210	GSCOC_T00033150001	-1.53762116527966	Probable ribose-5-phosphate isomerase
Cc07_g09780	GSCOC_T00037198001	-1.53698722387839	Soluble inorganic pyrophosphatase
Cc02_g01340	GSCOC_T00019954001	-1.53566693409737	Protein phosphatase 2C 57
Cc03_g02940	GSCOC_T00025967001	-1.53496774344156	Glutamine synthetase leaf isozyme, chloroplastic
Cc10_g09600	GSCOC_T00031521001	-1.53362417059979	Putative Carboxymethylenebutenolidase homolog
Cc05_g16090	GSCOC_T00038606001	-1.53028836061253	Porphobilinogen deaminase, chloroplastic
Cc08_g11360	GSCOC_T00027137001	-1.52741807758906	Chlorophyll A-B binding family protein
Cc08_g09070	GSCOC_T00017247001	-1.52594239975252	Putative Alcohol dehydrogenase class-3
Cc07_g01130	GSCOC_T00019201001	-1.52582723427104	Acyltransferase-like protein At3g26840, chloroplastic
Cc11_g13550	GSCOC_T00032168001	-1.52490717808494	FUNCTIONS IN
Cc00_g04220	GSCOC_T00001196001	-1.52341089847734	CONTAINS InterPro DOMAIN/s
Cc11_g15380	GSCOC_T00038048001	-1.51944983015897	ATP-citrate synthase alpha chain protein 1
Cc06_g14920	GSCOC_T00030903001	-1.51865043585231	Putative Gibberellin 2-beta-dioxygenase 8
Cc01_g03170	GSCOC_T00033154001	-1.51336464849982	Probable plastid-lipid-associated protein 12, chloroplastic
Cc02_g14660	GSCOC_T00013884001	-1.51269562270397	50S ribosomal protein L34, chloroplastic
Cc07_g01850	GSCOC_T00039362001	-1.51081120995474	Putative uncharacterized protein
Cc08_g03490	GSCOC_T00034129001	-1.50977698360583	Glycerol-3-phosphate acyltransferase, chloroplastic
Cc09_g10870	GSCOC_T00040993001	-1.50912337707552	Putative uncharacterized protein
Cc03_g16020	GSCOC_T00001667001	-1.50878482734606	Probable thiol methyltransferase 2
Cc01_g14080	GSCOC_T00028397001	-1.50761149493036	Putative Flavoprotein WrbA
Cc01_g09010	GSCOC_T00023942001	-1.50498903373075	Rho GTPase activating protein with PAK-box/P21-Rho-binding domain
Cc08_g01150	GSCOC_T00038425001	-1.50355680462042	unknown protein.
Cc07_g04160	GSCOC_T00039668001	-1.50334468485949	Alpha-amylase isozyme 2A
Cc05_g03650	GSCOC_T00017360001	-1.50240544544973	Putative Allene oxide synthase, chloroplastic
Cc02_g06940	GSCOC_T00039248001	-1.50172591491053	Duplicated homeodomain-like superfamily protein
Cc03_g05780	GSCOC_T00026346001	-1.50162577487741	Fibrillin 4
Cc05_g06450	GSCOC_T00042135001	-1.50094969175955	Predicted protein
Cc02_g38200	GSCOC_T00027894001	-1.50054602855997	Cysteine synthase, chloroplastic/chromoplastic
Cc07_g16230	GSCOC_T00037591001	-1.49902659180894	unknown protein; LOCATED IN
Cc03_g05210	GSCOC_T00026269001	-1.49715074401464	1-aminocyclopropane-1-carboxylate oxidase homolog 3
Cc08_g13500	GSCOC_T00030337001	-1.49647585220785	Ycf49-like protein
Cc09_g01110	GSCOC_T00017853001	-1.49006278911408	1-aminocyclopropane-1-carboxylate oxidase
Cc11_g15440	GSCOC_T00038055001	-1.48463608790862	2-phytyl-1,4-beta-naphthoquinone methyltransferase, chloroplastic
Cc10_g15830	GSCOC_T00033783001	-1.4838097522128	Uncharacterized protein At5g64816
Cc06_g20840	GSCOC_T00015863001	-1.48049989991576	Putative Protein CHLOROPLAST IMPORT APPARATUS 2
Cc02_g34560	GSCOC_T00000713001	-1.47922195044616	Probable protein phosphatase 2C 5
Cc09_g09220	GSCOC_T00023081001	-1.47871450063968	3-oxoacyl-[acyl-carrier-protein] synthase I, chloroplastic
Cc05_g16080	GSCOC_T00038607001	-1.47716214524909	Protein Iojap
Cc02_g25180	GSCOC_T00028783001	-1.47467397596632	ELMO/CED-12 family protein
Cc01_g14000	GSCOC_T00028385001	-1.47377278857456	Sodium-dependent phosphate transport protein 1, chloroplastic
Cc08_g10640	GSCOC_T00027036001	-1.4734384924886	Putative Predicted protein
Cc07_g14700	GSCOC_T00036578001	-1.4713483750952	Serine/threonine-protein kinase SAPK2
Cc02_g19320	GSCOC_T00014497001	-1.47007627496426	Methylthioribose kinase
Cc08_g00290	GSCOC_T00005587001	-1.46946896787528	unknown protein; LOCATED IN
Cc01_g00190	GSCOC_T00012415001	-1.46838907331893	protein containing PDZ domain, a K-box domain, and a TPR region
Cc02_g28560	GSCOC_T00009442001	-1.46783406935891	Protein of unknown function (DUF3411)
Cc05_g10090	GSCOC_T00021501001	-1.46227216623395	Probable glutathione S-transferase
Cc04_g13430	GSCOC_T00018290001	-1.46226898995218	Putative Calmodulin binding protein-like
Cc00_g12170	GSCOC_T00012515001	-1.46131094478983	Caffeic acid 3-O-methyltransferase
Cc05_g02720	GSCOC_T00020893001	-1.46096910275607	Putative Zinc finger CCCH domain-containing protein 3
Cc01_g12880	GSCOC_T00028239001	-1.455181535921	Probable aldo-keto reductase 3
Cc11_g14940	GSCOC_T00001039001	-1.45361082333775	Sterol 14-demethylase
Cc11_g10250	GSCOC_T00032601001	-1.45220101041396	Probable nitrite transporter At1g68570
Cc02_g06720	GSCOC_T00039215001	-1.44775737642204	30S ribosomal protein S31, chloroplastic
Cc06_g15730	GSCOC_T00030781001	-1.44618051445082	Plant protein of unknown function (DUF828)
Cc02_g22380	GSCOC_T00014907001	-1.44531172730238	Structural molecule, putative
Cc02_g05490	GSCOC_T00039059001	-1.44414363457298	Alpha-galactosidase
Cc06_g06390	GSCOC_T00031388001	-1.42531449656005	Putative 1-cysteine peroxiredoxin 1
Cc03_g06030	GSCOC_T00026380001	-1.42390321023697	Protein PROTON GRADIENT REGULATION 5, chloroplastic

## Sheet: SWD_vs_WW_eCO2_up
Gene ID	TID	Log2FC	Protein Name
Cc01_g08700	GSCOC_T00023904001	10.4183286129412	Momilactone A synthase
Cc06_g12520	GSCOC_T00041527001	9.41248497924242	Ethylene-responsive transcription factor ERF017
Cc11_g10180	GSCOC_T00032611001	9.02661228749867	3-ketoacyl-CoA synthase 6
Cc05_g04940	GSCOC_T00035039001	8.77135369936047	Isocitrate lyase
Cc02_g34740	GSCOC_T00011780001	8.65224092248115	Protein of unknown function (DUF679)
Cc11_g08920	GSCOC_T00032811001	8.57601894602536	unknown protein; BEST Arabidopsis thaliana protein match is
Cc05_g13060	GSCOC_T00021109001	8.49202569952091	(-)-germacrene D synthase
Cc02_g24750	GSCOC_T00028846001	7.69508646525384	Carotenoid cleavage dioxygenase 7, chloroplastic
Cc00_g12860	GSCOC_T00008937001	7.53626198946175	Putative ABC transporter B family member 9
Cc00_g01970	GSCOC_T00000819001	7.48214814972367	Putative Protein TIFY 5A
Cc10_g04990	GSCOC_T00034865001	7.13704980021563	Putative ZCF37
Cc10_g07580	GSCOC_T00034503001	7.12521371110516	Putative basic leucine-zipper 5
Cc06_g10620	GSCOC_T00041755001	6.95433489223215	Putative oxidative stress 3
Cc00_g19410	GSCOC_T00001267001	6.6646586122014	Desiccation-related protein PCC13-62
Cc02_g08150	GSCOC_T00029839001	6.35170130873324	delta(3), delta(2)-enoyl CoA isomerase 1
Cc04_g14100	GSCOC_T00035937001	6.28638286678465	Putative Probable inactive poly [ADP-ribose] polymerase SRO5
Cc03_g12310	GSCOC_T00015237001	6.18124986776938	Putative unknown protein; FUNCTIONS IN
Cc00_g04980	GSCOC_T00005519001	6.13862638773806	Hypothetical protein
Cc04_g10600	GSCOC_T00042618001	6.05822347101985	Putative Cytochrome P450 82A3
Cc02_g35350	GSCOC_T00042862001	6.01069953089849	Putative Uncharacterized protein R707
Cc02_g11470	GSCOC_T00029408001	6.00527698483076	Serine carboxypeptidase-like 27
Cc08_g13990	GSCOC_T00030278001	5.96021324851692	Putative Multidrug and toxin extrusion protein 1
Cc06_g05620	GSCOC_T00043121001	5.95877395023827	Probable purple acid phosphatase 20
Cc07_g04930	GSCOC_T00039754001	5.83614261408701	Putative TRICHOME BIREFRINGENCE-LIKE 19
Cc06_g13940	GSCOC_T00041327001	5.81530500437778	EG45-like domain containing protein
Cc03_g15270	GSCOC_T00026800001	5.79139309912344	Putative Reticuline oxidase-like protein
Cc01_g07390	GSCOC_T00030175001	5.68973869377885	Alcohol dehydrogenase-like 7
Cc01_g19530	GSCOC_T00016046001	5.62029496730304	Hypothetical protein
Cc04_g16330	GSCOC_T00035719001	5.52193496455696	Thioredoxin-like 1-2, chloroplastic
Cc06_g09490	GSCOC_T00041906001	5.47597302575573	Probable sulfate transporter 3.5
Cc02_g11510	GSCOC_T00029403001	5.47500282381526	MLO-like protein 6
Cc04_g09390	GSCOC_T00022826001	5.46510082510793	phosphate transporter 3;1
Cc00_g20820	GSCOC_T00008930001	5.44084834679125	Hypothetical protein
Cc11_g07770	GSCOC_T00018007001	5.41796577450027	Pathogenesis-related protein R major form
Cc07_g13110	GSCOC_T00036787001	5.3639798228419	Putative Ethylene-responsive transcription factor 15
Cc07_g13660	GSCOC_T00036709001	5.36318857236584	Geraniol dehydrogenase 1
Cc06_g00670	GSCOC_T00023255001	5.3354209716336	Sex determination protein tasselseed-2
Cc09_g02570	GSCOC_T00017659001	5.27378239256455	Putative Patatin group A-3
Cc00_g15700	GSCOC_T00006886001	5.21065305220909	Putative Monoglyceride lipase
Cc04_g14520	GSCOC_T00040694001	5.19221023842145	L-type lectin-domain containing receptor kinase IV.2
Cc05_g15260	GSCOC_T00038712001	5.17065759299807	RING/U-box superfamily protein
Cc04_g11660	GSCOC_T00037368001	5.15868923911266	Aldehyde dehydrogenase family 2 member C4
Cc10_g14270	GSCOC_T00012017001	5.15210879665775	Pathogen-related protein
Cc01_g19640	GSCOC_T00016033001	5.11241842416757	Putative Basic 7S globulin
Cc00_g11660	GSCOC_T00004163001	5.08970118263331	Pathogenesis-related protein P2
Cc09_g07380	GSCOC_T00036269001	5.07483009936462	Putative Reticuline oxidase-like protein
Cc06_g02060	GSCOC_T00023446001	5.04396774796934	Putative Encodes a protein involved in salt tolerance, names SIS (Salt Induced Serine rich).
Cc02_g13160	GSCOC_T00029192001	5.03378116467537	Putative pre-mRNA-splicing factor ATP-dependent RNA helicase DHX16
Cc01_g19650	GSCOC_T00016031001	5.00684918382145	Eukaryotic aspartyl protease family protein
Cc01_g00040	GSCOC_T00012436001	4.98347350660755	Benzyl alcohol O-benzoyltransferase
Cc02_g13580	GSCOC_T00029130001	4.92175930484206	Putative Late embryogenesis abundant protein (LEA) family protein
Cc09_g07440	GSCOC_T00036257001	4.87351387086283	Reticuline oxidase-like protein
Cc02_g12550	GSCOC_T00029269001	4.85098171106638	Putative Protein of unknown function (DUF761)
Cc06_g03160	GSCOC_T00023591001	4.76285606298735	exocyst subunit exo70 family protein H4
Cc06_g19530	GSCOC_T00029020001	4.71139231899486	UDP-glucose flavonoid 3-O-glucosyltransferase 6
Cc11_g06700	GSCOC_T00020695001	4.6866669541149	MACPF domain-containing protein At1g14780
Cc05_g01770	GSCOC_T00015755001	4.65541847079188	Eukaryotic aspartyl protease family protein
Cc11_g05110	GSCOC_T00020451001	4.6086679843371	G-type lectin S-receptor-like serine/threonine-protein kinase At4g27290
Cc06_g05110	GSCOC_T00043044001	4.6070393236381	unknown protein; FUNCTIONS IN
Cc00_g34980	GSCOC_T00013334001	4.57701807044597	UDP-glucose flavonoid 3-O-glucosyltransferase 6
Cc01_g12160	GSCOC_T00028141001	4.57504354340427	Putative exocyst subunit exo70 family protein H7
Cc10_g15150	GSCOC_T00033683001	4.56048054081928	Peroxidase 12
Cc09_g10000	GSCOC_T00041102001	4.54276826151061	Putative Protein of unknown function, DUF584
Cc03_g03180	GSCOC_T00025997001	4.51884503196019	Putative Basic 7S globulin
Cc02_g13110	GSCOC_T00029199001	4.50338076302895	Putative Stem-specific protein TSJT1
Cc02_g08330	GSCOC_T00029808001	4.50262477506064	Putative Zinc finger protein ZAT11
Cc06_g13830	GSCOC_T00041341001	4.47786442442213	Probable alpha,alpha-trehalose-phosphate synthase [UDP-forming] 11
Cc09_g03820	GSCOC_T00017499001	4.4725859685373	12-oxophytodienoate reductase 1
Cc04_g00790	GSCOC_T00021704001	4.45719224558586	Putative uncharacterized protein
Cc10_g15100	GSCOC_T00033677001	4.45536201664025	Putative uncharacterized protein
Cc01_g08690	GSCOC_T00023901001	4.45376552457728	Momilactone A synthase
Cc07_g11100	GSCOC_T00037039001	4.44974550197715	Heavy metal-associated isoprenylated plant protein 26
Cc06_g03920	GSCOC_T00023692001	4.3796454573539	Putative uncharacterized protein
Cc07_g05600	GSCOC_T00039837001	4.35876781130485	Polyneuridine-aldehyde esterase
Cc02_g03420	GSCOC_T00020226001	4.35056033629192	Putative Ethylene-responsive transcription factor ERF027
Cc04_g07150	GSCOC_T00022521001	4.31555638597172	Hypothetical protein
Cc01_g20380	GSCOC_T00015940001	4.3002818935257	Glutaredoxin-C11
Cc06_g09010	GSCOC_T00041975001	4.26139595048338	Potassium channel AKT1
Cc09_g01430	GSCOC_T00017812001	4.25916021732638	WRKY transcription factor 6
Cc01_g14430	GSCOC_T00028442001	4.23728310288626	Probable protein phosphatase 2C 25
Cc06_g18280	GSCOC_T00040435001	4.19989848400158	Glucan endo-1,3-beta-glucosidase, acidic isoform PR-Q'
Cc06_g01870	GSCOC_T00023424001	4.18695349322157	PAR1 protein
Cc03_g02620	GSCOC_T00025917001	4.13527514173893	inosine-uridine preferring nucleoside hydrolase family protein
Cc06_g02670	GSCOC_T00023526001	4.11917746493751	Probable protein phosphatase 2C 4
Cc01_g04050	GSCOC_T00040848001	4.11446599222587	Putative G-type lectin S-receptor-like serine/threonine-protein kinase RLK1
Cc01_g07420	GSCOC_T00030179001	4.11154536976929	Alcohol dehydrogenase-like 7
Cc00_g11670	GSCOC_T00004164001	4.1026839029221	Pathogenesis-related protein P2
Cc00_g19980	GSCOC_T00001485001	4.07734446514556	Putative Wall-associated receptor kinase-like 1
Cc04_g10590	GSCOC_T00042615001	4.07708654340952	Putative Cytochrome P450 82A1 (Fragment)
Cc04_g08100	GSCOC_T00022658001	4.06880546665242	Tropinone reductase homolog At1g07440
Cc02_g18030	GSCOC_T00014336001	4.04939976708785	Non-symbiotic hemoglobin 1
Cc06_g02080	GSCOC_T00023448001	4.03002847134937	Putative Uncharacterized protein
Cc07_g04990	GSCOC_T00039760001	4.01570750604262	Probable isoprenylcysteine alpha-carbonyl methylesterase ICMEL2
Cc02_g13990	GSCOC_T00029072001	3.98685863691154	Putative Monothiol glutaredoxin-S5
Cc04_g05080	GSCOC_T00022253001	3.98647897908783	Probable WRKY transcription factor 40
Cc01_g15550	GSCOC_T00016548001	3.97172936082179	Putative Cytochrome P450 734A6
Cc11_g10010	GSCOC_T00032640001	3.95913736692586	Putative unknown protein; BEST Arabidopsis thaliana protein match is
Cc04_g07360	GSCOC_T00022550001	3.95694910414049	Putative Protein ASPARTIC PROTEASE IN GUARD CELL 1
Cc10_g01560	GSCOC_T00024633001	3.935094988531	Thaumatin-like protein 1
Cc07_g19660	GSCOC_T00018531001	3.92868130514637	Isoflavone 2'-hydroxylase
Cc04_g03730	GSCOC_T00022071001	3.91245268854264	Pleiotropic drug resistance protein 1
Cc11_g12740	GSCOC_T00032276001	3.90140609818132	NAC domain-containing protein 29
Cc05_g12500	GSCOC_T00021185001	3.89881098188499	NAC domain-containing protein 72
Cc06_g06090	GSCOC_T00043180001	3.87739168446028	Beta-fructofuranosidase, insoluble isoenzyme 1
Cc07_g14740	GSCOC_T00036573001	3.86841448778595	Peroxidase 17
Cc03_g03550	GSCOC_T00026046001	3.84247563542356	Sugar transport protein 13
Cc05_g04090	GSCOC_T00031589001	3.80925225988157	mitogen-activated protein kinase kinase kinase 18
Cc06_g17840	GSCOC_T00040375001	3.78782277313832	Zeatin O-glucosyltransferase
Cc07_g04870	GSCOC_T00039748001	3.76732120384368	Proline dehydrogenase 2, mitochondrial
Cc03_g09610	GSCOC_T00030945001	3.74488232625684	Putative UDP-glycosyltransferase 76E11
Cc10_g07470	GSCOC_T00034517001	3.7334073813747	Putative Uncharacterized WD repeat-containing protein alr3466
Cc11_g08170	GSCOC_T00032911001	3.70426132724152	Putative 21 kDa protein
Cc01_g16570	GSCOC_T00016426001	3.70305913535299	Putative Chaperone protein dnaJ 20, chloroplastic
Cc10_g01830	GSCOC_T00024672001	3.70072790071874	Cytokinin riboside 5'-monophosphate phosphoribohydrolase LOG1
Cc02_g06730	GSCOC_T00039216001	3.69972557837722	Anthranilate synthase component I-1, chloroplastic
Cc03_g03470	GSCOC_T00026033001	3.69832695599739	Putative unknown protein; BEST Arabidopsis thaliana protein match is
Cc01_g14440	GSCOC_T00028443001	3.68560635692194	Putative uncharacterized protein
Cc06_g08260	GSCOC_T00031153001	3.67791304482218	Putative Umecyanin
Cc08_g04060	GSCOC_T00034210001	3.65599795737629	Putative G-type lectin S-receptor-like serine/threonine-protein kinase CES101
Cc02_g35340	GSCOC_T00042863001	3.64148807522954	Putative UDP-glucuronate
Cc07_g13290	GSCOC_T00036762001	3.63944531912305	Glutamine synthetase cytosolic isozyme 2
Cc00_g17930	GSCOC_T00008101001	3.62783412551689	Putative unknown protein; Has 35333 Blast hits to 34131 proteins in 2444 species
Cc11_g09310	GSCOC_T00032753001	3.60985995641445	Putative Phosphatidylserine synthase 2
Cc05_g02920	GSCOC_T00033458001	3.59865070900841	1-aminocyclopropane-1-carboxylate oxidase 4
Cc10_g08450	GSCOC_T00034388001	3.59834189034527	Putative uncharacterized protein
Cc10_g01190	GSCOC_T00024586001	3.59588684626852	Pentatricopeptide repeat-containing protein At1g20230
Cc05_g00090	GSCOC_T00017027001	3.57938359029411	unknown protein; BEST Arabidopsis thaliana protein match is
Cc01_g15540	GSCOC_T00016549001	3.57800712736248	Putative cytochrome P450, family 714, subfamily A, polypeptide 1
Cc10_g05650	GSCOC_T00034783001	3.57338121921147	Zinc finger protein ZAT10
Cc10_g12690	GSCOC_T00031988001	3.5550583047969	Putative Uncharacterized amino-acid permease C584.13
Cc04_g02460	GSCOC_T00021918001	3.55102244041265	Hypothetical protein
Cc11_g14120	GSCOC_T00032103001	3.54087109165922	Putative unknown protein; BEST Arabidopsis thaliana protein match is
Cc02_g33930	GSCOC_T00008641001	3.52919089247874	NAC domain-containing protein 2
Cc08_g15400	GSCOC_T00035469001	3.5266308186766	Putative Late embryogenesis abundant (LEA) hydroxyproline-rich glycoprotein family
Cc05_g08100	GSCOC_T00016821001	3.52637313140125	unknown protein; FUNCTIONS IN
Cc11_g17170	GSCOC_T00038276001	3.52584968079579	WRKY DNA binding protein
Cc00_g16010	GSCOC_T00009613001	3.51960908806981	Putative disease resistance RPP13-like protein 1
Cc10_g00540	GSCOC_T00024508001	3.51440265858329	Probable serine/threonine-protein kinase Cx32, chloroplastic
Cc08_g15340	GSCOC_T00035463001	3.50773339805437	Putative Protein LURP-one-related 17
Cc06_g09070	GSCOC_T00041969001	3.49684184324363	3-ketoacyl-CoA synthase 11
Cc04_g12840	GSCOC_T00003258001	3.48598790279638	Putative U-box domain-containing protein 19
Cc07_g04940	GSCOC_T00039755001	3.48569430072053	Putative Endo-1,3(4)-beta-glucanase 1
Cc10_g06230	GSCOC_T00034687001	3.48330543624106	Laccase-14
Cc03_g05190	GSCOC_T00026267001	3.43693317293587	1-aminocyclopropane-1-carboxylate oxidase homolog 3
Cc00_g05500	GSCOC_T00006856001	3.43577859579239	Hypothetical protein
Cc02_g11090	GSCOC_T00029455001	3.43318783736428	Probable receptor-like protein kinase At5g15080
Cc04_g02140	GSCOC_T00021882001	3.42763157821977	NADH dehydrogenase [ubiquinone] iron-sulfur protein 7, mitochondrial
Cc01_g14420	GSCOC_T00028440001	3.42527767373699	Asparagine synthetase [glutamine-hydrolyzing]
Cc09_g05530	GSCOC_T00013395001	3.41924653707977	ABC transporter C family member 4
Cc11_g04420	GSCOC_T00004786001	3.41877397336799	Hypothetical protein
Cc06_g08250	GSCOC_T00031154001	3.40657946595873	Putative Early nodulin-like protein 1
Cc07_g07750	GSCOC_T00040135001	3.40075075698156	Hypothetical protein
Cc05_g05740	GSCOC_T00035151001	3.38889822152061	Predicted protein
Cc02_g18150	GSCOC_T00014351001	3.38778609789797	Putative Myosin heavy chain kinase B
Cc09_g07450	GSCOC_T00036255001	3.38421344582415	Reticuline oxidase-like protein
Cc03_g05070	GSCOC_T00026246001	3.37631033423136	Protein EIN4
Cc09_g07410	GSCOC_T00036265001	3.34569539038162	Reticuline oxidase-like protein
Cc09_g07430	GSCOC_T00036260001	3.34263946308678	Reticuline oxidase-like protein
Cc02_g26920	GSCOC_T00025001001	3.33936502715798	Putative uncharacterized protein
Cc08_g09670	GSCOC_T00026913001	3.33491823565572	Putative Mitogen-activated protein kinase kinase kinase 1
Cc02_g38650	GSCOC_T00027834001	3.32497579156246	Putative Late embryogenesis abundant (LEA) hydroxyproline-rich glycoprotein family
Cc03_g07460	GSCOC_T00026598001	3.31849940999029	Cellulose synthase-like protein D1
Cc06_g08240	GSCOC_T00031156001	3.30918966208552	Putative Stellacyanin
Cc11_g11030	GSCOC_T00032492001	3.29509146006525	Putative uncharacterized protein
Cc08_g07860	GSCOC_T00011881001	3.29068369729571	Putative Probable WRKY transcription factor 40
Cc02_g22570	GSCOC_T00014932001	3.28175662512743	Putative RmlC-like cupins superfamily protein
Cc06_g11590	GSCOC_T00041639001	3.25364844077876	calmodulin-binding family protein
Cc00_g34520	GSCOC_T00012632001	3.25011584693999	Benzyl alcohol O-benzoyltransferase
Cc01_g01870	GSCOC_T00019259001	3.24776026473274	Pre-mRNA-processing-splicing factor 8
Cc00_g22210	GSCOC_T00002538001	3.24021091782378	ABC transporter C family member 4
Cc06_g09330	GSCOC_T00041928001	3.23851701281884	Predicted protein
Cc04_g06360	GSCOC_T00022422001	3.23082785858423	Calcium-binding allergen Ole e 8
Cc01_g10320	GSCOC_T00024120001	3.22242084564143	Putative RING finger and CHY zinc finger domain-containing protein 1
Cc11_g14110	GSCOC_T00032104001	3.22155978356053	Putative unknown protein; BEST Arabidopsis thaliana protein match is
Cc03_g04970	GSCOC_T00026229001	3.21246582821641	Inhibitor of trypsin and hageman factor
Cc05_g12520	GSCOC_T00021180001	3.20069575872331	Hypothetical protein
Cc11_g14010	GSCOC_T00032115001	3.19799048110752	Probable galacturonosyltransferase-like 9
Cc04_g16290	GSCOC_T00035715001	3.1951795583883	NAC domain-containing protein 100
Cc06_g02030	GSCOC_T00023443001	3.18639706265568	Glutathione S-transferase U8
Cc10_g01580	GSCOC_T00024638001	3.17017773022071	Putative uncharacterized protein
Cc11_g01380	GSCOC_T00019574001	3.15588638017074	Putative unknown protein; FUNCTIONS IN
Cc10_g05500	GSCOC_T00034799001	3.14720369283119	NAD(P)-binding Rossmann-fold superfamily protein
Cc09_g05960	GSCOC_T00033381001	3.14073968051495	Putative Ankyrin repeat family protein
Cc01_g10160	GSCOC_T00024097001	3.13793376942308	Putative Ring/U-Box superfamily protein
Cc10_g07630	GSCOC_T00034498001	3.13639600431153	Putative uncharacterized protein
Cc06_g07420	GSCOC_T00031263001	3.12997520850583	Putative unknown protein; FUNCTIONS IN
Cc02_g22890	GSCOC_T00014967001	3.12242178965753	COBRA-like protein 6
Cc02_g14360	GSCOC_T00013843001	3.12041676220775	Putative Glutamate receptor 2.7
Cc02_g26970	GSCOC_T00025008001	3.11244183855493	Callose synthase 2
Cc02_g23250	GSCOC_T00015012001	3.09404995455571	Putative uncharacterized protein
Cc00_g34570	GSCOC_T00006097001	3.09276228955296	CYP71AT2v1
Cc06_g11710	GSCOC_T00041624001	3.0657277818103	unknown protein; BEST Arabidopsis thaliana protein match is
Cc00_g04190	GSCOC_T00006614001	3.06038944928049	60S ribosomal protein L10-2
Cc11_g11380	GSCOC_T00032451001	3.05724630438708	Putative Redox-regulatory protein FAM213A
Cc01_g19140	GSCOC_T00016098001	3.05152961026278	Putative serine/threonine-protein kinase/receptor R826
Cc03_g02250	GSCOC_T00025863001	3.04553887160271	Putative RING finger and CHY zinc finger domain-containing protein 1
Cc02_g30740	GSCOC_T00023816001	3.04358384683066	Non-symbiotic hemoglobin 2
Cc05_g11470	GSCOC_T00021311001	3.04129760847705	Putative sodium/calcium exchanger family protein / calcium-binding EF hand family protein
Cc02_g06790	GSCOC_T00039229001	3.04106431833287	Nematode resistance protein-like HSPRO2
Cc06_g19200	GSCOC_T00028972001	3.03990535577822	Transmembrane amino acid transporter family protein
Cc00_g15960	GSCOC_T00007992001	3.02551638557683	Isoflavone reductase homolog
Cc00_g33050	GSCOC_T00011764001	3.01597832773471	ABC transporter C family member 14
Cc05_g03370	GSCOC_T00033548001	2.99997268283766	Putative U5 small nuclear ribonucleoprotein 200 kDa helicase
Cc08_g10740	GSCOC_T00027051001	2.99594423369925	Beta-fructofuranosidase, insoluble isoenzyme CWINV1
Cc07_g12210	GSCOC_T00036908001	2.99329237599993	RNA-binding (RRM/RBD/RNP motifs) family protein
Cc01_g14950	GSCOC_T00016622001	2.98327455890914	Putative Probable WRKY transcription factor 3
Cc11_g04600	GSCOC_T00004818001	2.97871905221781	unknown protein; INVOLVED IN
Cc00_g13890	GSCOC_T00003227001	2.97582825280942	Double WRKY type transfactor
Cc02_g03520	GSCOC_T00020237001	2.96078534815725	peptidoglycan-binding LysM domain-containing protein
Cc04_g15740	GSCOC_T00042352001	2.95982942105792	Probable peptide/nitrate transporter At5g62680
Cc07_g12020	GSCOC_T00036930001	2.95247923419552	Auxin efflux carrier family protein
Cc06_g02040	GSCOC_T00023444001	2.93795934088259	Probable glutathione S-transferase
Cc06_g19190	GSCOC_T00028971001	2.93384676105428	Putative Vesicular GABA transporter
Cc07_g18570	GSCOC_T00018734001	2.92941016152739	Ent-kaur-16-ene synthase, chloroplastic
Cc06_g15450	GSCOC_T00030823001	2.92639872047599	Putative uncharacterized protein
Cc08_g10320	GSCOC_T00026996001	2.92034455841736	Vacuolar-processing enzyme
Cc06_g15980	GSCOC_T00030750001	2.92014389578451	18 kDa seed maturation protein
Cc10_g07360	GSCOC_T00034533001	2.91823242286306	Putative uncharacterized protein
Cc05_g13480	GSCOC_T00021057001	2.91081719025614	Putative Septum-promoting GTP-binding protein 1
Cc06_g01030	GSCOC_T00023309001	2.90831663597536	Putative UPF0098 protein MTH_273
Cc00_g11020	GSCOC_T00000140001	2.9028911881059	Secologanin synthase
Cc11_g08220	GSCOC_T00032906001	2.9024518569904	Putative Cysteine-rich receptor-like protein kinase 25
Cc03_g03480	GSCOC_T00026038001	2.89489732527455	Putative Probable membrane-associated kinase regulator 1
Cc03_g09690	GSCOC_T00030955001	2.8935797831452	dCTP pyrophosphatase 1
Cc10_g10410	GSCOC_T00010112001	2.89090011304724	Putative UDP-glucose flavonoid 3-O-glucosyltransferase 3
Cc04_g11920	GSCOC_T00037404001	2.88803791011962	Putative Probable receptor-like protein kinase At1g67000
Cc07_g12900	GSCOC_T00036817001	2.88547833244077	Glutamate decarboxylase
Cc04_g13860	GSCOC_T00035901001	2.87640933251945	Metal tolerance protein A1
Cc06_g02310	GSCOC_T00023485001	2.87562495686439	Putative Protein of unknown function (DUF668)
Cc01_g20130	GSCOC_T00015970001	2.87273016387634	Hypothetical protein
Cc00_g30530	GSCOC_T00007195001	2.8679268851296	Putative Cytochrome P450 83B1
Cc08_g13770	GSCOC_T00030306001	2.86756203604156	non-yellowing 1
Cc00_g17430	GSCOC_T00013477001	2.8618652741402	Isoflavone reductase homolog P3
Cc08_g12330	GSCOC_T00030498001	2.85933488123707	Putative Metalloendoproteinase 1
Cc10_g05130	GSCOC_T00034851001	2.85584093426765	Putative Uncharacterised conserved protein UCP031279
Cc11_g01690	GSCOC_T00019532001	2.84734941517607	Putative EG45-like domain containing protein
Cc08_g03300	GSCOC_T00010789001	2.84646462490225	Transcription factor jumonji (jmj) family protein / zinc finger (C5HC2 type) family protein
Cc02_g15910	GSCOC_T00014058001	2.84399100873311	Probable LRR receptor-like serine/threonine-protein kinase RFK1
Cc11_g00330	GSCOC_T00019466001	2.83322265096	Alpha-galactosidase
Cc06_g08410	GSCOC_T00031135001	2.82599470223638	Putative uncharacterized protein
Cc00_g13050	GSCOC_T00010498001	2.81683398848292	Glutamate dehydrogenase A
Cc10_g09650	GSCOC_T00031516001	2.80539487086106	Cytochrome P450 716B2
Cc04_g07380	GSCOC_T00022554001	2.79886417938159	Putative Protein ASPARTIC PROTEASE IN GUARD CELL 1
Cc06_g10500	GSCOC_T00041771001	2.79749071149259	Putative Receptor-like protein kinase HSL1
Cc01_g21270	GSCOC_T00004999001	2.7816038213411	alpha/beta-Hydrolases superfamily protein
Cc06_g13410	GSCOC_T00041401001	2.77965791872976	Xyloglucan endotransglucosylase/hydrolase protein 22
Cc07_g03480	GSCOC_T00039580001	2.77823338622237	Hypothetical protein
Cc11_g09290	GSCOC_T00032756001	2.76853489134813	Putative Pentatricopeptide repeat-containing protein At1g22960, mitochondrial
Cc07_g00660	GSCOC_T00019144001	2.76170234757139	Calcium-binding protein CML38
Cc00_g10730	GSCOC_T00003002001	2.7605271889481	Hypothetical protein
Cc07_g02770	GSCOC_T00039483001	2.75546250986846	Probable galacturonosyltransferase-like 9
Cc06_g22490	GSCOC_T00012876001	2.74321704903263	UDP-glucose flavonoid 3-O-glucosyltransferase 6
Cc01_g19020	GSCOC_T00016112001	2.73959205190898	Heat stress transcription factor A-6b
Cc06_g01240	GSCOC_T00023337001	2.72252451016578	Trihelix transcription factor GT-3a
Cc00_g28790	GSCOC_T00012906001	2.7212611362871	Isoflavone reductase homolog P3
Cc07_g12910	GSCOC_T00036815001	2.71670469604026	Glutamate decarboxylase
Cc00_g13040	GSCOC_T00010496001	2.70606995825452	Mitochondrial import inner membrane translocase subunit Tim17/Tim22/Tim23 family protein
Cc02_g12560	GSCOC_T00029268001	2.7041082122086	Putative Probable ADP-ribosylation factor GTPase-activating protein AGD5
Cc10_g08460	GSCOC_T00034387001	2.70249045482449	binding
Cc04_g09400	GSCOC_T00022827001	2.702186669916	Phosphate carrier protein, mitochondrial
Cc02_g26510	GSCOC_T00024948001	2.69228687698995	Putative disease resistance protein RGA3
Cc01_g12850	GSCOC_T00028236001	2.6885865439615	Metallothionein 1 (Fragment)
Cc02_g11160	GSCOC_T00029447001	2.68810722176411	Protein kinase superfamily protein
Cc06_g17740	GSCOC_T00040362001	2.68134750537231	Glycosyltransferase family 61 protein
Cc07_g06080	GSCOC_T00039902001	2.67840678231089	mitogen-activated protein kinase kinase kinase 21
Cc00_g28180	GSCOC_T00003233001	2.67787291919667	Phosphoenolpyruvate carboxykinase [ATP]
Cc06_g09020	GSCOC_T00041974001	2.67533110970201	Potassium channel AKT1
Cc02_g01790	GSCOC_T00020014001	2.6691609680485	Probable trehalose-phosphate phosphatase 2
Cc08_g03180	GSCOC_T00037832001	2.6651234817391	Putative Protein Rf1, mitochondrial
Cc05_g06890	GSCOC_T00042205001	2.65859829911203	Putative Clathrin light chain 1
Cc03_g01020	GSCOC_T00025704001	2.65443188624698	Putative Suppressor of Mek1
Cc08_g15870	GSCOC_T00035531001	2.65118538603329	Putative Hydroquinone glucosyltransferase
Cc00_g01380	GSCOC_T00010636001	2.65081576686705	L-type lectin-domain containing receptor kinase IV.1
Cc07_g00500	GSCOC_T00019122001	2.64556173324286	Lysine histidine transporter 1
Cc00_g08410	GSCOC_T00009640001	2.64345128873254	Galactoside 2-alpha-L-fucosyltransferase
Cc03_g07810	GSCOC_T00026645001	2.63685041694181	Putative uncharacterized protein
Cc08_g05330	GSCOC_T00024288001	2.63140598658479	Alternative oxidase 3, mitochondrial
Cc01_g07650	GSCOC_T00015432001	2.62406251270991	Hypothetical protein
Cc00_g13770	GSCOC_T00013300001	2.61843647756924	Alpha-aminoadipic semialdehyde synthase
Cc07_g07540	GSCOC_T00040104001	2.61454402542089	Homeobox-leucine zipper protein HAT22
Cc02_g35310	GSCOC_T00042866001	2.61041114556021	Plant neutral invertase family protein
Cc02_g33490	GSCOC_T00015379001	2.60935438115045	Putative Peroxisomal adenine nucleotide transporter 1
Cc05_g01440	GSCOC_T00018223001	2.60808758813099	4-hydroxyphenylpyruvate dioxygenase
Cc00_g11010	GSCOC_T00000139001	2.60369514136934	Hypothetical protein
Cc00_g32800	GSCOC_T00001453001	2.60116250837847	unknown protein; FUNCTIONS IN
Cc05_g12340	GSCOC_T00021202001	2.60097133307632	Putative Stem-specific protein TSJT1
Cc00_g28880	GSCOC_T00002612001	2.59584840572652	P-loop containing nucleoside triphosphate hydrolases superfamily protein
Cc04_g14500	GSCOC_T00040692001	2.59503808665386	Ribulose bisphosphate carboxylase/oxygenase activase 1, chloroplastic
Cc01_g06680	GSCOC_T00030066001	2.59447434554872	Protein kinase APK1A, chloroplastic
Cc06_g18760	GSCOC_T00028904001	2.58911376861145	Putative methyltransferase DDB_G0268948
Cc04_g00640	GSCOC_T00021686001	2.58367470093372	Putative RING-H2 finger protein ATL3
Cc11_g10260	GSCOC_T00032600001	2.58077875140291	Glycolipid transfer protein (GLTP) family protein
Cc03_g02380	GSCOC_T00025880001	2.57704665916899	Inactive beta-amylase 9
Cc02_g39330	GSCOC_T00027730001	2.57603516186387	Tetratricopeptide repeat (TPR)-like superfamily protein
Cc08_g01550	GSCOC_T00038369001	2.56949452017153	pleckstrin homology (PH) domain-containing protein
Cc00_g19580	GSCOC_T00006064001	2.56920781734009	heteroglycan glucosidase 1
Cc02_g35840	GSCOC_T00042783001	2.55214357900195	Putative Isopenicillin N epimerase
Cc11_g13240	GSCOC_T00032208001	2.54696886639052	Putative unknown protein; BEST Arabidopsis thaliana protein match is
Cc11_g09060	GSCOC_T00032793001	2.54694102344818	RING/FYVE/PHD zinc finger superfamily protein
Cc05_g09870	GSCOC_T00021529001	2.54514426070489	Probable amino acid permease 7
Cc10_g02820	GSCOC_T00024791001	2.54353003595429	Hypothetical protein
Cc06_g05290	GSCOC_T00043072001	2.54219769485899	Putative PHYTOSULFOKINE 3 PRECURSOR
Cc02_g10760	GSCOC_T00029494001	2.53892163046274	Major facilitator superfamily protein
Cc08_g01680	GSCOC_T00038347001	2.53606223096491	unknown protein; FUNCTIONS IN
Cc08_g02570	GSCOC_T00037734001	2.52905832526534	unknown protein; Has 39 Blast hits to 39 proteins in 10 species
Cc02_g18180	GSCOC_T00014355001	2.5262633335339	Putative uncharacterized protein
Cc02_g05870	GSCOC_T00039107001	2.52453718295173	Arogenate dehydrogenase 1, chloroplastic
Cc11_g12780	GSCOC_T00032271001	2.52429475979819	Putative cAMP-regulated phosphoprotein 19-related protein
Cc07_g10120	GSCOC_T00037157001	2.5206946120805	Putative Epoxide hydrolase 2
Cc00_g02300	GSCOC_T00007933001	2.519588351154	SNAP25 homologous protein SNAP33
Cc00_g07030	GSCOC_T00003186001	2.51660136541098	Putative Pentatricopeptide repeat-containing protein At5g62370
Cc04_g02510	GSCOC_T00021924001	2.51637172036043	Putative Auxin-responsive protein IAA18
Cc07_g12920	GSCOC_T00036814001	2.50931390075858	Putative Universal stress protein A-like protein
Cc01_g07640	GSCOC_T00015431001	2.50864204818922	Transcription factor LHW
Cc06_g16940	GSCOC_T00004150001	2.48572533995626	Hypothetical protein
Cc08_g13180	GSCOC_T00030372001	2.46856193450462	UDP-glucuronate 4-epimerase 3
Cc08_g15170	GSCOC_T00035443001	2.46444674104924	Heat shock protein 83
Cc06_g16520	GSCOC_T00030679001	2.45763096599174	Hypothetical protein
Cc07_g04520	GSCOC_T00039708001	2.45574078842749	Auxin transport protein BIG
Cc07_g07300	GSCOC_T00040072001	2.45408325749568	ACT domain repeat 1
Cc02_g09550	GSCOC_T00029643001	2.45080258399911	Duplicated homeodomain-like superfamily protein
Cc06_g16930	GSCOC_T00004149001	2.44971266628694	Transcription factor
Cc08_g04350	GSCOC_T00034257001	2.44815078451541	Putative UDP-glycosyltransferase 73C7
Cc01_g10260	GSCOC_T00024109001	2.44762079670397	Putative C2H2-type zinc finger family protein
Cc01_g20010	GSCOC_T00015984001	2.44499742917255	Putative Ankyrin-3
Cc02_g34220	GSCOC_T00000658001	2.44245921092539	Hypoxia-responsive family protein
Cc02_g32950	GSCOC_T00016726001	2.43933512219941	Putative Bifunctional 3-dehydroquinate dehydratase/shikimate dehydrogenase, chloroplastic
Cc06_g01670	GSCOC_T00023397001	2.43848557065705	Probable anion transporter 3, chloroplastic
Cc03_g14610	GSCOC_T00026684001	2.43810744258993	Putative late blight resistance protein homolog R1B-17
Cc07_g20200	GSCOC_T00016979001	2.43531983385617	Putative uncharacterized protein
Cc08_g10840	GSCOC_T00027063001	2.43299264431501	calmodulin-binding family protein
Cc10_g03940	GSCOC_T00034997001	2.42088512686205	Putative Protein of unknown function (DUF1645)
Cc02_g08180	GSCOC_T00029836001	2.42063467940046	CONTAINS InterPro DOMAIN/s
Cc04_g12380	GSCOC_T00005296001	2.41884533000529	Putative uncharacterized protein
Cc02_g08580	GSCOC_T00029775001	2.4142086582327	Receptor-like protein kinase HERK 1
Cc09_g03240	GSCOC_T00017575001	2.41322597413426	Putative F-box protein At2g02240
Cc04_g08700	GSCOC_T00022743001	2.41295833207084	Cysteine-rich receptor-like protein kinase 25
Cc04_g09030	GSCOC_T00022780001	2.41194298341247	Chaperone DnaJ-domain superfamily protein
Cc05_g04450	GSCOC_T00031671001	2.41088316293381	Putative late blight resistance protein homolog R1B-16
Cc06_g04430	GSCOC_T00042952001	2.41011341235365	Major facilitator superfamily protein
Cc09_g04460	GSCOC_T00017423001	2.40827937891435	CTP synthase
Cc03_g04200	GSCOC_T00026129001	2.40511063962012	Putative uncharacterized protein
Cc08_g00430	GSCOC_T00038523001	2.40084726058675	Putative Extended synaptotagmin-3
Cc00_g23580	GSCOC_T00010323001	2.40041696252236	Isoflavone reductase homolog A622
Cc02_g37120	GSCOC_T00028035001	2.39577471171328	Putative peptidoglycan-binding LysM domain-containing protein
Cc04_g02420	GSCOC_T00021913001	2.38847024862766	Putative actin binding protein family
Cc07_g12220	GSCOC_T00036907001	2.38822693133305	3-hydroxy-3-methylglutaryl-coenzyme A reductase
Cc00_g11080	GSCOC_T00000147001	2.38388719951753	Secologanin synthase
Cc02_g05970	GSCOC_T00039118001	2.37987299869362	Putative Dehydration-responsive element-binding protein 2C
Cc00_g10990	GSCOC_T00000137001	2.37954870063399	Secologanin synthase
Cc11_g00310	GSCOC_T00019460001	2.37210795434688	Putative vacuolar protein sorting-associated protein 13B
Cc02_g33140	GSCOC_T00015328001	2.37054771160484	Probable xyloglucan endotransglucosylase/hydrolase 1
Cc07_g10030	GSCOC_T00037166001	2.36602627705461	Dehydrin DH1a
Cc07_g12510	GSCOC_T00036863001	2.36505465513974	ATP-dependent zinc metalloprotease FTSH 6, chloroplastic
Cc10_g03070	GSCOC_T00024826001	2.36429280556128	Protein kinase superfamily protein
Cc01_g00370	GSCOC_T00013679001	2.35543443665599	Benzyl alcohol O-benzoyltransferase
Cc02_g18810	GSCOC_T00014436001	2.35352805105416	Abscisic acid 8'-hydroxylase 4
Cc06_g21410	GSCOC_T00018159001	2.35051187061962	Putative Transcription elongation factor SPT6
Cc02_g23650	GSCOC_T00015067001	2.34964854442616	Putative F-box protein At3g07870
Cc02_g02860	GSCOC_T00020155001	2.34793343024636	4-coumarate--CoA ligase-like 10
Cc06_g09540	GSCOC_T00041900001	2.34275089559511	Multiprotein-bridging factor 1c
Cc01_g20490	GSCOC_T00015927001	2.34181950541568	Putative uncharacterized protein
Cc04_g05310	GSCOC_T00022280001	2.3395545740628	Putative unknown protein; BEST Arabidopsis thaliana protein match is
Cc05_g16170	GSCOC_T00038598001	2.33411311053013	Elongation factor 2
Cc01_g01600	GSCOC_T00037879001	2.32113446883336	Putative disease resistance protein RGA3
Cc10_g06310	GSCOC_T00034677001	2.31892389998512	Uncharacterized aarF domain-containing protein kinase At1g71810, chloroplastic
Cc10_g15870	GSCOC_T00033789001	2.31855861161325	Mechanosensitive ion channel protein 3, chloroplastic
Cc03_g07570	GSCOC_T00026612001	2.31185312704576	Putative Non-lysosomal glucosylceramidase
Cc10_g06500	GSCOC_T00034647001	2.30036285834696	Purine permease 3
Cc06_g12500	GSCOC_T00041530001	2.29623452540622	Putative Protein TIFY 10A
Cc06_g05890	GSCOC_T00043157001	2.29499979206493	Putative unknown protein; FUNCTIONS IN
Cc00_g30350	GSCOC_T00012664001	2.2820526360777	Putative UDP-glucose flavonoid 3-O-glucosyltransferase 3
Cc00_g17350	GSCOC_T00004259001	2.27888430351751	Putative LRR receptor-like serine/threonine-protein kinase GSO1
Cc03_g00350	GSCOC_T00025614001	2.26846875311972	Inositol transporter 4
Cc10_g12730	GSCOC_T00031992001	2.26581882459334	NAD kinase 2, chloroplastic
Cc02_g14820	GSCOC_T00013904001	2.26130779010994	ARM repeat superfamily protein
Cc00_g08270	GSCOC_T00003341001	2.26126563652246	Isoflavone reductase homolog A622
Cc07_g12680	GSCOC_T00036844001	2.25871766324192	Probable polyamine oxidase 4
Cc02_g14040	GSCOC_T00029066001	2.25185700036572	Hypothetical protein
Cc04_g05060	GSCOC_T00022250001	2.25124475212211	CBL-interacting serine/threonine-protein kinase 5
Cc02_g29230	GSCOC_T00004503001	2.24449501806729	Putative Flavonoid 3'-monooxygenase
Cc10_g07520	GSCOC_T00034512001	2.24093754187083	2,3-bisphosphoglycerate-dependent phosphoglycerate mutase
Cc11_g09350	GSCOC_T00032746001	2.24002672196794	Putative uncharacterized protein
Cc01_g12840	GSCOC_T00028235001	2.23961924740211	Putative Predicted protein
Cc05_g13090	GSCOC_T00021106001	2.23731365973799	Putative Probable leucine-rich repeat receptor-like serine/threonine-protein kinase At5g15730
Cc11_g13020	GSCOC_T00032235001	2.22561041769102	Putative uncharacterized protein
Cc02_g02420	GSCOC_T00020097001	2.22317220881675	unknown protein; BEST Arabidopsis thaliana protein match is
Cc04_g03100	GSCOC_T00021999001	2.22037758282958	Putative Dynein light chain LC6, flagellar outer arm
Cc04_g08430	GSCOC_T00022702001	2.21606147173615	Putative uncharacterized protein
Cc03_g09070	GSCOC_T00042717001	2.2104688218477	Putative Receptor-like protein 12
Cc10_g04740	GSCOC_T00034900001	2.20031893523799	SPla/RYanodine receptor (SPRY) domain-containing protein
Cc02_g25740	GSCOC_T00028706001	2.20020558614997	Putative Phosphorylated carbohydrates phosphatase TM_1254
Cc05_g15020	GSCOC_T00038745001	2.19961644451237	E3 ubiquitin-protein ligase UPL1
Cc07_g10410	GSCOC_T00037119001	2.19833390943959	Zinc finger CCCH domain-containing protein 19
Cc08_g08140	GSCOC_T00007259001	2.17046692545977	unknown protein; LOCATED IN
Cc01_g18290	GSCOC_T00016222001	2.16879790023823	Putative Structural maintenance of chromosomes protein 1A
Cc02_g32110	GSCOC_T00018928001	2.16832544667557	Phospholipid-transporting ATPase 1
Cc01_g11900	GSCOC_T00028106001	2.16321571278732	Probable serine/threonine-protein kinase RLCKVII
Cc02_g39970	GSCOC_T00027635001	2.15841822881577	Late embryogenesis abundant (LEA) hydroxyproline-rich glycoprotein family
Cc03_g07470	GSCOC_T00026599001	2.15701796436689	Putative F-box protein At2g02240
Cc11_g05120	GSCOC_T00020452001	2.15344709809853	G-type lectin S-receptor-like serine/threonine-protein kinase At4g27290
Cc08_g14510	GSCOC_T00030213001	2.15168508354132	Putative copper-transporting ATPase HMA5
Cc02_g09320	GSCOC_T00029669001	2.14457408901048	Putative Pentatricopeptide repeat-containing protein At2g26790, mitochondrial
Cc02_g04730	GSCOC_T00020395001	2.14090218849205	Putative Ethylene-responsive transcription factor 5
Cc02_g20050	GSCOC_T00014606001	2.13850184538496	Putative pre-mRNA-processing protein 40A
Cc06_g10600	GSCOC_T00041757001	2.13838817052313	Putative uncharacterized protein
Cc02_g01010	GSCOC_T00019909001	2.13290271251162	Putative Homeobox-leucine zipper protein ATHB-7
Cc10_g14120	GSCOC_T00011999001	2.12800608198288	Putative U-box domain-containing protein 28
Cc02_g20390	GSCOC_T00014652001	2.12272122024148	Receptor-like protein kinase HAIKU2
Cc05_g14010	GSCOC_T00038870001	2.11830821691238	SWAP (Suppressor-of-White-APricot)/surp domain-containing protein
Cc07_g12470	GSCOC_T00036869001	2.11153640938689	Probable acyl-activating enzyme 5, peroxisomal
Cc01_g08340	GSCOC_T00015538001	2.10896923316919	Putative Structural maintenance of chromosomes protein 3
Cc06_g14110	GSCOC_T00041300001	2.10443719865973	tetraspanin8
Cc09_g01320	GSCOC_T00017827001	2.10325985823049	Transcription factor jumonji (jmjC) domain-containing protein
Cc04_g01520	GSCOC_T00021806001	2.10113060193756	Putative Midasin
Cc06_g11120	GSCOC_T00041695001	2.09960189201797	Pollen-specific protein SF21
Cc00_g04970	GSCOC_T00005517001	2.09621183354595	Hypothetical protein
Cc02_g01110	GSCOC_T00019919001	2.09593558547896	P-loop containing nucleoside triphosphate hydrolases superfamily protein
Cc01_g16950	GSCOC_T00016382001	2.09219724495438	Putative Helicase/SANT-associated, DNA binding protein
Cc02_g33780	GSCOC_T00013091001	2.08950796581262	Probable linoleate 9S-lipoxygenase 5
Cc07_g01350	GSCOC_T00019229001	2.0881915143287	Putative unknown protein; FUNCTIONS IN
Cc10_g05950	GSCOC_T00034733001	2.08515876480795	Hypothetical protein
Cc02_g22670	GSCOC_T00014944001	2.07352934037097	Probable receptor-like protein kinase At1g11050
Cc06_g08420	GSCOC_T00031134001	2.06829052526557	Phospholipase D alpha 1
Cc05_g07590	GSCOC_T00016753001	2.06796355453013	Ethylene-responsive transcription factor 4
Cc00_g18750	GSCOC_T00008462001	2.06700154931079	Hypothetical protein
Cc02_g07800	GSCOC_T00029891001	2.06455927752504	Protein kinase APK1A, chloroplastic
Cc02_g13370	GSCOC_T00029167001	2.06180989690147	Callose synthase 11
Cc11_g15930	GSCOC_T00038120001	2.05990159731086	Putative Uncharacterized sufE-like protein slr1419
Cc03_g05600	GSCOC_T00026320001	2.05916293235463	Protein of unknown function (DUF668)
Cc10_g08380	GSCOC_T00034395001	2.04894698377827	E3 ubiquitin protein ligase upl2, putative
Cc02_g29380	GSCOC_T00018358001	2.04759296765259	transcription coactivators
Cc04_g04070	GSCOC_T00022125001	2.04057236131385	Ubiquitin-protein ligase, putative
Cc02_g12990	GSCOC_T00029213001	2.0359127226728	NADPH
Cc03_g00400	GSCOC_T00025619001	2.03520173953466	calcium-dependent lipid-binding family protein
Cc01_g15180	GSCOC_T00016595001	2.03365884918277	CBL-interacting serine/threonine-protein kinase 11
Cc01_g19860	GSCOC_T00016003001	2.03235779038847	oxidoreductase, 2OG-Fe(II) oxygenase family protein
Cc02_g04850	GSCOC_T00020414001	2.03043309920845	alpha/beta-Hydrolases superfamily protein
Cc08_g01530	GSCOC_T00038372001	2.02812250060622	Beta-amylase 3, chloroplastic
Cc09_g01340	GSCOC_T00017824001	2.02741501463061	Core-2/I-branching beta-1,6-N-acetylglucosaminyltransferase family protein
Cc02_g14380	GSCOC_T00013846001	2.02634038793149	Probable ATP-dependent RNA helicase DHX35
Cc04_g14700	GSCOC_T00040731001	2.024643327338	pheophytinase
Cc00_g01370	GSCOC_T00010635001	2.02438685333668	L-type lectin-domain containing receptor kinase IV.1
Cc02_g25480	GSCOC_T00028742001	2.0224182889354	Putative uncharacterized protein
Cc05_g01900	GSCOC_T00015780001	2.01552602784577	Putative Uncharacterized membrane protein At3g27390
Cc02_g14290	GSCOC_T00013836001	2.01532731388496	Putative negative regulator of systemic acquired resistance (SNI1)
Cc06_g15090	GSCOC_T00030882001	2.00688292483591	BTB/POZ domain-containing protein At2g24240
Cc00_g11590	GSCOC_T00007371001	2.00607977338011	Putative myb domain protein 116
Cc10_g14950	GSCOC_T00033653001	2.00127813702313	Putative Probable LRR receptor-like serine/threonine-protein kinase At3g47570
Cc10_g05250	GSCOC_T00034834001	1.99861680608263	Putative Cytochrome P450 81D1
Cc11_g15450	GSCOC_T00038056001	1.99800612069145	Cysteine-rich receptor-like protein kinase 2
Cc08_g01250	GSCOC_T00038413001	1.99703549347743	Putative uncharacterized protein
Cc10_g07210	GSCOC_T00034552001	1.99635336999834	Hypothetical protein
Cc06_g22450	GSCOC_T00005214001	1.99624034957941	Putative Cytochrome P450 83B1
Cc06_g02620	GSCOC_T00023520001	1.99522619180078	Putative proteolysis 6
Cc02_g20980	GSCOC_T00014726001	1.99170602496114	Transcription initiation factor TFIID subunit 1-A
Cc06_g18910	GSCOC_T00028930001	1.98675669916923	Plant protein 1589 of unknown function
Cc02_g10280	GSCOC_T00029545001	1.98653350293744	Putative Lysine histidine transporter 1
Cc10_g13840	GSCOC_T00035230001	1.98300881857204	Putative uncharacterized protein
Cc01_g11250	GSCOC_T00024248001	1.98145390436384	Pyridoxal biosynthesis protein PDX2
Cc11_g03870	GSCOC_T00033996001	1.97976256664464	Putative Glycerophosphoryl diester phosphodiesterase
Cc08_g01510	GSCOC_T00038374001	1.97739802894155	Probable receptor-like protein kinase At5g47070
Cc04_g11510	GSCOC_T00037343001	1.97557628314153	Tropinone reductase homolog At1g07440
Cc02_g15630	GSCOC_T00014017001	1.97453265470181	Probable alpha,alpha-trehalose-phosphate synthase [UDP-forming] 7
Cc11_g02310	GSCOC_T00032991001	1.97423056501997	Hypothetical protein
Cc03_g08030	GSCOC_T00033191001	1.9714675763997	Putative Histidine kinase-, DNA gyrase B-, and HSP90-like ATPase family protein
Cc07_g07330	GSCOC_T00040079001	1.96682201817987	Putative basic leucine-zipper 6
Cc06_g00610	GSCOC_T00023245001	1.96461185429562	Hypothetical protein
Cc06_g23250	GSCOC_T00040598001	1.96453590942481	Putative Protein RRP5 homolog
Cc08_g16550	GSCOC_T00035618001	1.95669638754698	Putative Transducin/WD40 repeat-like superfamily protein
Cc02_g09160	GSCOC_T00029693001	1.95482333774513	Putative Trans-2,3-enoyl-CoA reductase
Cc07_g11910	GSCOC_T00036942001	1.94822551740438	Putative uncharacterized protein
Cc08_g14720	GSCOC_T00030189001	1.94733704527601	Putative bromo-adjacent homology (BAH) domain-containing protein
Cc05_g12750	GSCOC_T00021150001	1.94667479909881	Protein of unknown function (DUF1223)
Cc11_g01340	GSCOC_T00019588001	1.94523418011086	STYLOSA protein
Cc10_g12660	GSCOC_T00031985001	1.93979973018618	Protein translocase subunit SECA2, chloroplastic
Cc05_g08110	GSCOC_T00016822001	1.93824175533716	Putative late embryogenesis abundant domain-containing protein / LEA domain-containing protein
Cc01_g10510	GSCOC_T00024147001	1.93816679320032	4-coumarate--CoA ligase-like 7
Cc10_g00570	GSCOC_T00024513001	1.93796996159327	Catalase
Cc06_g03260	GSCOC_T00023605001	1.93445703608932	unknown protein; FUNCTIONS IN
Cc07_g02460	GSCOC_T00039441001	1.93148245382443	Putative DNA repair protein UVH3
Cc01_g19930	GSCOC_T00015995001	1.92836124647856	Receptor-like cytosolic serine/threonine-protein kinase RBK2
Cc04_g00550	GSCOC_T00021673001	1.92783890386172	Autoinhibited H ATPase
Cc08_g16310	GSCOC_T00035588001	1.92651313061253	DCD (Development and Cell Death) domain protein
Cc07_g05030	GSCOC_T00039764001	1.91962511466195	Putative Histone H3-K56 acetyltransferase, RTT109
Cc03_g09660	GSCOC_T00030952001	1.91912975417125	Ras-related protein RABA5c
Cc11_g11070	GSCOC_T00032488001	1.9169912874645	Putative Protein of unknown function (DUF1262)
Cc03_g00450	GSCOC_T00025626001	1.91610098727271	galactinol synthase 2
Cc06_g11020	GSCOC_T00041706001	1.91214146381843	Hypothetical protein
Cc04_g04590	GSCOC_T00022189001	1.91203280984702	Glycerol kinase
Cc06_g12150	GSCOC_T00041571001	1.91068079446411	Putative unknown protein; BEST Arabidopsis thaliana protein match is
Cc06_g18520	GSCOC_T00040471001	1.91039541376045	Triacylglycerol lipase SDP1
Cc07_g11230	GSCOC_T00037025001	1.90896656230206	Putative Aspartic proteinase-like protein 1
Cc11_g16050	GSCOC_T00038134001	1.90799624776371	Cellulase (glycosyl hydrolase family 5) protein
Cc04_g12540	GSCOC_T00005318001	1.90489429979743	Cell division cycle protein 48 homolog
Cc01_g13170	GSCOC_T00028280001	1.90484832656258	Hypothetical protein
Cc10_g01200	GSCOC_T00024587001	1.9025151458131	Probable nucleoredoxin 2
Cc08_g02880	GSCOC_T00037789001	1.9016634964844	PLATZ transcription factor family protein
Cc08_g15320	GSCOC_T00035461001	1.89888006375659	Hypothetical protein
Cc10_g13690	GSCOC_T00035250001	1.89859335257284	Zinc finger CCCH domain-containing protein 7
Cc02_g08160	GSCOC_T00029838001	1.89192680158717	unknown protein; INVOLVED IN
Cc10_g13270	GSCOC_T00035319001	1.88919648642721	2-oxoisovalerate dehydrogenase subunit alpha, mitochondrial
Cc07_g12820	GSCOC_T00036828001	1.882029317844	Putative At5g37260 (Fragment)
Cc00_g05920	GSCOC_T00004279001	1.88060459024959	Putative uncharacterized protein
Cc02_g18160	GSCOC_T00014352001	1.88037920609786	Putative Guanine nucleotide-binding protein alpha-2 subunit
Cc08_g10050	GSCOC_T00026964001	1.87869095760885	BEST Arabidopsis thaliana protein match is
Cc06_g16680	GSCOC_T00030651001	1.87576361523794	Putative polyol transporter 1
Cc02_g39340	GSCOC_T00027729001	1.87534526384599	Putative Tetratricopeptide repeat (TPR)-like superfamily protein
Cc10_g00730	GSCOC_T00024531001	1.87265844457168	unknown protein; BEST Arabidopsis thaliana protein match is
Cc02_g06800	GSCOC_T00039230001	1.87003882606465	Putative Tetratricopeptide repeat (TPR)-like superfamily protein
Cc03_g03490	GSCOC_T00026039001	1.86808080747703	Putative uncharacterized protein
Cc11_g05220	GSCOC_T00020463001	1.86079276444079	Bifunctional inhibitor/lipid-transfer protein/seed storage 2S albumin superfamily protein
Cc05_g11460	GSCOC_T00021312001	1.85416428467838	sodium/calcium exchanger family protein / calcium-binding EF hand family protein
Cc08_g11020	GSCOC_T00027092001	1.83328792048224	Putative Puromycin-sensitive aminopeptidase
Cc08_g12990	GSCOC_T00030400001	1.83226592652346	RNA helicase family protein
Cc06_g08070	GSCOC_T00031178001	1.83225706036247	Probable galactinol--sucrose galactosyltransferase 6
Cc05_g11710	GSCOC_T00021280001	1.83073672883128	Probable aminotransferase TAT2
Cc08_g00610	GSCOC_T00038491001	1.824976049612	Putative unknown protein; FUNCTIONS IN
Cc01_g05810	GSCOC_T00027403001	1.82385467953152	chromatin remodeling 5
Cc02_g14480	GSCOC_T00013859001	1.82123501067242	unknown protein; FUNCTIONS IN
Cc06_g07650	GSCOC_T00031236001	1.82040676088137	Octicosapeptide/Phox/Bem1p (PB1) domain-containing protein / tetratricopeptide repeat (TPR)-containing protein
Cc06_g18320	GSCOC_T00040442001	1.81467631619825	Putative uncharacterized protein
Cc03_g12590	GSCOC_T00015195001	1.81356471995018	Putative Pentatricopeptide repeat-containing protein At5g65560
Cc06_g01170	GSCOC_T00023329001	1.81330168632037	SAC domain-containing protein 8
Cc06_g04900	GSCOC_T00043016001	1.81133391410178	E3 ubiquitin-protein ligase UPL7
Cc02_g08660	GSCOC_T00029765001	1.80880132705454	Putative uncharacterized protein
Cc06_g10190	GSCOC_T00041818001	1.80577100042696	Sugar transport protein 14
Cc07_g03470	GSCOC_T00039578001	1.79860439638241	Putative Dof zinc finger protein DOF5.2
Cc08_g14340	GSCOC_T00030236001	1.79745339966353	tetraspanin10
Cc10_g02590	GSCOC_T00024764001	1.79728244269707	Glucose-1-phosphate adenylyltransferase large subunit, chloroplastic/amyloplastic
Cc08_g04360	GSCOC_T00034258001	1.79573086720384	ENHANCED DISEASE RESISTANCE 2
Cc01_g06740	GSCOC_T00030073001	1.7910915529918	Putative Acyl-CoA N-acyltransferases (NAT) superfamily protein
Cc01_g18990	GSCOC_T00016117001	1.79097919579932	Beige/BEACH domain ;WD domain, G-beta repeat protein
Cc07_g09440	GSCOC_T00037242001	1.7904407117981	Cytochrome P450 90B1
Cc02_g33330	GSCOC_T00015361001	1.79042550833724	Putative Vacuole membrane protein 1
Cc09_g00910	GSCOC_T00017883001	1.79014569769448	Fumarylacetoacetase
Cc11_g02410	GSCOC_T00032970001	1.78939536473379	Putative Sacsin
Cc06_g08980	GSCOC_T00041979001	1.78818495859322	Putative unknown protein; BEST Arabidopsis thaliana protein match is
Cc11_g11400	GSCOC_T00032449001	1.78787343225441	Putative Sodium-coupled neutral amino acid transporter 2
Cc03_g02280	GSCOC_T00025869001	1.78620543294938	CASP-like protein VIT_05s0020g01820
Cc09_g08710	GSCOC_T00020848001	1.78395279511021	Putative Uncharacterized membrane protein C24H6.13
Cc01_g19030	GSCOC_T00016111001	1.78344609612969	Probable inactive protein kinase At3g63330
Cc02_g09950	GSCOC_T00029585001	1.77905233188091	Pleiotropic drug resistance protein 2
Cc06_g12400	GSCOC_T00041541001	1.77522202566564	inter-alpha-trypsin inhibitor heavy chain-related
Cc02_g02070	GSCOC_T00020051001	1.77450649502039	Acidic endochitinase SE2
Cc03_g03960	GSCOC_T00026097001	1.77276243021198	Putative Protein of unknown function (DUF581)
Cc10_g07460	GSCOC_T00034518001	1.77228439710396	Ethylene-responsive transcription factor RAP2-4
Cc07_g15310	GSCOC_T00036492001	1.77202823417373	ABC transporter D family member 1
Cc11_g17220	GSCOC_T00038282001	1.77109557172339	unknown protein; BEST Arabidopsis thaliana protein match is
Cc02_g37010	GSCOC_T00028047001	1.77083130371984	Putative Lysophosphatidylcholine acyltransferase 2
Cc05_g03140	GSCOC_T00033506001	1.7690238162686	Nitrate transporter 1.3
Cc00_g14860	GSCOC_T00001456001	1.76811969144994	DNA-directed RNA polymerase III subunit RPC1
Cc00_g21200	GSCOC_T00009601001	1.76797557768067	Plant neutral invertase family protein
Cc03_g02900	GSCOC_T00025961001	1.76685475234979	Eukaryotic translation initiation factor 2 subunit 3, Y-linked
Cc09_g00130	GSCOC_T00017988001	1.76307092280651	6-phosphofructokinase 2
Cc06_g14070	GSCOC_T00041304001	1.76157651079136	Hypothetical protein
Cc02_g13700	GSCOC_T00029111001	1.75289960108654	Putative Ethylene-responsive transcription factor 4
Cc00_g05550	GSCOC_T00009828001	1.75241336268976	Putative DDT domain-containing protein
Cc02_g22740	GSCOC_T00014952001	1.75128919610639	T-complex protein 11
Cc07_g02500	GSCOC_T00039446001	1.74822811121638	Peroxidase superfamily protein
Cc02_g03350	GSCOC_T00020216001	1.7472751183685	F-box protein PP2-A13
Cc11_g10760	GSCOC_T00032537001	1.74633064648564	Putative nuclear matrix constituent protein-related
Cc07_g03060	GSCOC_T00039520001	1.74599279794689	FACT complex subunit SSRP1
Cc10_g16200	GSCOC_T00033835001	1.74270354663448	Putative 3-hydroxybenzoate 6-hydroxylase 1
Cc02_g21160	GSCOC_T00014752001	1.74233734264714	Riboflavin biosynthesis protein ribBA, chloroplastic
Cc10_g13350	GSCOC_T00035308001	1.74203495241489	Putative uncharacterized protein
Cc04_g04670	GSCOC_T00022199001	1.74142843145887	Protein TOPLESS
Cc08_g06500	GSCOC_T00036040001	1.74116553327189	Putative CONTAINS InterPro DOMAIN/s
Cc00_g09120	GSCOC_T00012326001	1.74015023522383	Putative Nuclear-pore anchor
Cc10_g09080	GSCOC_T00034299001	1.73634046630196	Predicted protein
Cc07_g20610	GSCOC_T00007209001	1.73503791150901	Putative Subtilisin-like protease
Cc10_g13150	GSCOC_T00035333001	1.73412111185529	Scarecrow-like protein 1
Cc07_g12720	GSCOC_T00036840001	1.73284596882147	Protein SET DOMAIN GROUP 40
Cc07_g05040	GSCOC_T00039765001	1.7271878989737	Putative nuclear matrix constituent protein 1-like protein
Cc06_g11840	GSCOC_T00041610001	1.72464166194088	Myosin family protein with Dil domain
Cc03_g02290	GSCOC_T00025870001	1.72444640621775	CASP-like protein POPTRDRAFT_820933
Cc03_g02630	GSCOC_T00025919001	1.72130238124891	Histidine-containing phosphotransfer protein 1
Cc02_g13710	GSCOC_T00029110001	1.72115502074409	MACPF domain-containing protein NSL1
Cc02_g38910	GSCOC_T00027792001	1.72064645956641	Common plant regulatory factor 1
Cc04_g01480	GSCOC_T00021802001	1.72056519060741	Putative Nuclear transcription factor Y subunit A-3
Cc04_g12630	GSCOC_T00012776001	1.71568937727782	Putative Disease resistance protein RPP8
Cc04_g01030	GSCOC_T00021735001	1.71049821471218	Putative CONTAINS InterPro DOMAIN/s
Cc04_g05730	GSCOC_T00022339001	1.70806883516263	FUNCTIONS IN
Cc08_g06690	GSCOC_T00005857001	1.70641321306771	Dynamin-related protein 3A
Cc04_g02180	GSCOC_T00021886001	1.70637453441069	Putative uncharacterized protein
Cc06_g11810	GSCOC_T00041613001	1.70443261775317	Putative uncharacterized protein
Cc01_g21360	GSCOC_T00004989001	1.70437605686835	DNA mismatch repair protein Msh6-1
Cc10_g08080	GSCOC_T00034440001	1.70389075565292	Receptor-like protein kinase HAIKU2
Cc02_g39320	GSCOC_T00027736001	1.70383551420468	Hypothetical protein
Cc02_g14940	GSCOC_T00013920001	1.70226796691246	Putative B-block binding subunit of TFIIIC
Cc08_g15330	GSCOC_T00035462001	1.70127811806323	Putative uncharacterized protein
Cc02_g12360	GSCOC_T00029292001	1.70043984938146	Sugar carrier protein C
Cc05_g15760	GSCOC_T00038650001	1.69928680581274	Putative uncharacterized protein
Cc02_g32510	GSCOC_T00001236001	1.69325983077017	Sugar transporter ERD6-like 5
Cc07_g06120	GSCOC_T00039907001	1.68935514949251	Nicotinate phosphoribosyltransferase
Cc11_g00230	GSCOC_T00019448001	1.68645761576421	Putative Transducin/WD40 repeat-like superfamily protein
Cc08_g01080	GSCOC_T00038432001	1.68418217228008	myosin, putative
Cc07_g01520	GSCOC_T00039324001	1.6822281436597	beta-1,4-N-acetylglucosaminyltransferase family protein
Cc10_g08160	GSCOC_T00034430001	1.68206705140935	Phosphoenolpyruvate carboxykinase [ATP]
Cc02_g39040	GSCOC_T00027773001	1.67704125195422	Putative GH3 auxin-responsive promoter
Cc07_g16560	GSCOC_T00037546001	1.67655519454848	unknown protein; INVOLVED IN
Cc07_g19410	GSCOC_T00018590001	1.67578701857908	Beta-1,3-galactosyltransferase 7
Cc11_g10310	GSCOC_T00032594001	1.67503751512797	Protein kinase superfamily protein
Cc04_g09100	GSCOC_T00022788001	1.6742848618894	Glutamate decarboxylase
Cc03_g02050	GSCOC_T00025840001	1.67412950834607	Putative uncharacterized protein
Cc07_g03570	GSCOC_T00039597001	1.6718431362216	NAC domain-containing protein 100
Cc06_g16020	GSCOC_T00030746001	1.67046423282784	SNF2 domain-containing protein / helicase domain-containing protein
Cc05_g13040	GSCOC_T00021111001	1.66417549450004	Hypothetical protein
Cc06_g17660	GSCOC_T00040349001	1.66275397746798	Heat stress transcription factor B-3
Cc06_g16510	GSCOC_T00030682001	1.66224884622107	Serine/threonine-protein kinase Nek6
Cc03_g10090	GSCOC_T00031011001	1.66185148255155	Major allergen Pru ar 1
Cc02_g09670	GSCOC_T00029624001	1.65513077167474	Putative unknown protein; LOCATED IN
Cc02_g36910	GSCOC_T00003860001	1.65283346583835	Uncharacterized protein
Cc10_g07500	GSCOC_T00034514001	1.65048848734204	P-loop containing nucleoside triphosphate hydrolases superfamily protein
Cc11_g05170	GSCOC_T00020458001	1.64833873263992	Eukaryotic peptide chain release factor subunit 1-3
Cc11_g11550	GSCOC_T00032430001	1.64732435311465	Putative uncharacterized protein
Cc06_g15130	GSCOC_T00030876001	1.64565538241027	Hypothetical protein
Cc09_g07950	GSCOC_T00003783001	1.64555222081894	Putative Signal recognition particle 68 kDa protein
Cc11_g03800	GSCOC_T00033981001	1.64140893943949	Putative late blight resistance protein homolog R1B-14
Cc09_g00100	GSCOC_T00017991001	1.63843317373412	Hypothetical protein
Cc00_g25830	GSCOC_T00001794001	1.63822687587347	1-aminocyclopropane-1-carboxylate oxidase 4
Cc11_g00280	GSCOC_T00019457001	1.63782797608378	Putative Protein of unknown function (DUF1162)
Cc01_g16520	GSCOC_T00016431001	1.63629678539136	Putative unknown protein; Has 1807 Blast hits to 1807 proteins in 277 species
Cc01_g05990	GSCOC_T00027430001	1.63574906609208	Putative DNA binding;zinc ion binding;DNA binding
Cc09_g04270	GSCOC_T00017448001	1.63303841246755	Pentatricopeptide repeat-containing protein At4g01570
Cc07_g13310	GSCOC_T00036760001	1.63245771453133	Nudix hydrolase 18, mitochondrial
Cc01_g21600	GSCOC_T00004961001	1.63213538183764	Stachyose synthase
Cc03_g01430	GSCOC_T00025755001	1.63170755112603	Phospholipase D p1
Cc05_g05760	GSCOC_T00035156001	1.62757088516992	Putative UDP-glucose flavonoid 3-O-glucosyltransferase 3
Cc02_g28540	GSCOC_T00009440001	1.62609222515025	Putative Structural maintenance of chromosomes protein 5
Cc10_g02810	GSCOC_T00024790001	1.62537941395676	Putative Probable LRR receptor-like serine/threonine-protein kinase At2g16250
Cc03_g02590	GSCOC_T00025913001	1.62359868195207	Sugar transporter ERD6-like 16
Cc02_g27520	GSCOC_T00025082001	1.62353017973809	Putative Transcription factor bHLH122
Cc08_g16330	GSCOC_T00035590001	1.62196339520393	Auxin response factor 9
Cc04_g05560	GSCOC_T00022315001	1.61993556741879	Chaperone protein ClpD, chloroplastic
Cc08_g08330	GSCOC_T00007233001	1.61882931992983	Putative SPOC domain / Transcription elongation factor S-II protein
Cc06_g01790	GSCOC_T00023412001	1.61432877639546	Putative Uncharacterized protein C3orf32
Cc05_g06810	GSCOC_T00042196001	1.60767777075401	Putative NDR1/HIN1-like 25
Cc04_g09610	GSCOC_T00022856001	1.60656629409529	Histidine kinase-, DNA gyrase B-, and HSP90-like ATPase family protein
Cc06_g08690	GSCOC_T00031097001	1.60387030306697	Putative Probable ethanolamine kinase A
Cc06_g02730	GSCOC_T00023534001	1.60361427718494	Putative E3 ubiquitin-protein ligase XBAT31
Cc02_g06120	GSCOC_T00039137001	1.59593346196551	Putative Probable LRR receptor-like serine/threonine-protein kinase MRH1
Cc06_g07590	GSCOC_T00031243001	1.59584769003946	serine-rich protein-related
Cc06_g17650	GSCOC_T00040348001	1.59328686012221	ABC transporter A family member 1
Cc10_g03460	GSCOC_T00024871001	1.59094591557287	Protein DA1
Cc01_g21810	GSCOC_T00004935001	1.58861315777881	ABC transporter B family member 11
Cc11_g13090	GSCOC_T00032225001	1.58800186229953	Sphingoid base hydroxylase 2
Cc11_g01670	GSCOC_T00019535001	1.58453251305026	Putative Carbon catabolite repressor protein 4 homolog 6
Cc04_g17220	GSCOC_T00035860001	1.5844606348659	ABC transporter A family member 2
Cc06_g20790	GSCOC_T00015872001	1.58237471062697	DNA ligase 4
Cc00_g29380	GSCOC_T00004275001	1.58176936598879	Putative SAP domain-containing protein
Cc10_g10090	GSCOC_T00031457001	1.58042154525051	Putative late blight resistance protein homolog R1B-16
Cc03_g02210	GSCOC_T00025859001	1.58022435438262	Putative chromatin-remodeling complex ATPase chain
Cc08_g08260	GSCOC_T00007242001	1.57928171085676	Putative Enhancer of polycomb-like transcription factor protein
Cc03_g13950	GSCOC_T00031766001	1.579156227237	Putative Uncharacterized protein C3B8.09
Cc04_g06570	GSCOC_T00022448001	1.57860043086576	Putative WD repeat-containing protein 1
Cc07_g07850	GSCOC_T00040147001	1.57750893993613	Protein of unknown function (duplicated DUF1399)
Cc04_g10490	GSCOC_T00042601001	1.57590209998201	Putative uncharacterized protein
Cc02_g18020	GSCOC_T00014335001	1.57456680662155	Putative Plastid division protein PDV2
Cc08_g00100	GSCOC_T00005565001	1.57395585940547	Putative Plant protein of unknown function (DUF868)
Cc01_g05690	GSCOC_T00027381001	1.57394509779262	Putative Magnesium transporter NIPA2
Cc10_g02080	GSCOC_T00024704001	1.57379259357996	PLC-like phosphodiesterases superfamily protein
Cc04_g10090	GSCOC_T00042546001	1.57377703947279	Putative unknown protein; BEST Arabidopsis thaliana protein match is
Cc11_g09430	GSCOC_T00032726001	1.57324166923508	Putative late blight resistance protein homolog R1A-6
Cc03_g03270	GSCOC_T00026009001	1.57301860672974	Putative unknown protein; BEST Arabidopsis thaliana protein match is
Cc00_g24200	GSCOC_T00008184001	1.57158312477004	Putative Small subunit processome component 20 homolog
Cc00_g19070	GSCOC_T00000778001	1.56480133547951	Aldehyde dehydrogenase family 7 member B4
Cc08_g14660	GSCOC_T00030196001	1.56008425571759	Putative transcription factor jumonji (jmjC) domain-containing protein
Cc07_g15410	GSCOC_T00036479001	1.55681455921041	Acyl-coenzyme A oxidase 2, peroxisomal
Cc01_g00030	GSCOC_T00012437001	1.55584366132303	Mediator of RNA polymerase II transcription subunit 13 homolog
Cc02_g13390	GSCOC_T00029165001	1.55281898063191	Putative Probable ubiquitin-conjugating enzyme E2 24
Cc10_g13830	GSCOC_T00035231001	1.54915367164062	Hypothetical protein
Cc06_g09940	GSCOC_T00041849001	1.54900402740943	Hypothetical protein
Cc04_g01330	GSCOC_T00021776001	1.54731334792972	Nodulation-signaling pathway 1 protein
Cc08_g14960	GSCOC_T00035413001	1.54586887382354	Putative RING/U-box superfamily protein
Cc02_g20500	GSCOC_T00014664001	1.5456926217428	Glutamyl-tRNA reductase 1, chloroplastic
Cc05_g13050	GSCOC_T00021110001	1.54370962245699	Organic cation/carnitine transporter 4
Cc08_g05650	GSCOC_T00024351001	1.54055295655922	Putative uncharacterized protein
Cc00_g14970	GSCOC_T00004040001	1.54033345618783	EXPRESSED IN
Cc04_g05210	GSCOC_T00022267001	1.53976803948643	Chaperone protein dnaJ 8, chloroplastic
Cc02_g05190	GSCOC_T00039021001	1.53914233415858	Putative Protein of unknown function DUF3133
Cc02_g28160	GSCOC_T00025183001	1.53758480000548	Putative Protein OBERON 4
Cc07_g09830	GSCOC_T00037192001	1.53551714890027	Putative unknown protein; BEST Arabidopsis thaliana protein match is
Cc08_g12310	GSCOC_T00030500001	1.53290658817515	Putative uncharacterized protein
Cc08_g14920	GSCOC_T00035406001	1.53065090860741	Peptidase M1 family protein
Cc05_g14630	GSCOC_T00038796001	1.52978890301644	Probable serine/threonine-protein kinase WNK11
Cc03_g02970	GSCOC_T00025970001	1.52868147155426	ARM repeat superfamily protein
Cc11_g11930	GSCOC_T00032381001	1.52803476655055	Putative Ninja-family protein AFP2
Cc10_g07790	GSCOC_T00034479001	1.52802229796086	Early-responsive to dehydration stress protein (ERD4)
Cc10_g10700	GSCOC_T00019392001	1.52740117398943	unknown protein; FUNCTIONS IN
Cc06_g11730	GSCOC_T00041621001	1.5270452840605	Putative unknown protein; BEST Arabidopsis thaliana protein match is
Cc02_g06260	GSCOC_T00039153001	1.52689855579481	Probable protein phosphatase 2C 25
Cc07_g04630	GSCOC_T00039720001	1.52564445181098	SMAD/FHA domain-containing protein _x0001_
Cc09_g05420	GSCOC_T00007127001	1.52462454828033	Copper-transporting ATPase RAN1
Cc02_g13340	GSCOC_T00029170001	1.52337908494396	Putative Phosphoserine phosphatase 1
Cc06_g09660	GSCOC_T00041885001	1.5206593762967	Putative uncharacterized protein
Cc02_g04180	GSCOC_T00020322001	1.52012142422079	Beta-fructofuranosidase, soluble isoenzyme I
Cc11_g11600	GSCOC_T00032424001	1.5184991070188	ACT domain repeat 4
Cc00_g10950	GSCOC_T00002319001	1.51824432713821	Putative Transcription elongation factor (TFIIS) family protein
Cc03_g08300	GSCOC_T00033231001	1.51529338406085	Beta-galactosidase 9
Cc07_g01960	GSCOC_T00039375001	1.51498756889681	Putative unknown protein; BEST Arabidopsis thaliana protein match is
Cc03_g02950	GSCOC_T00025968001	1.51461500070696	alpha/beta-Hydrolases superfamily protein
Cc01_g13520	GSCOC_T00028320001	1.51342356178043	Putative Encodes a protein involved in salt tolerance, names SIS (Salt Induced Serine rich).
Cc01_g01100	GSCOC_T00037984001	1.51310210966348	Putative UDP-glycosyltransferase 85A3
Cc11_g05270	GSCOC_T00020471001	1.51149117192207	Sodium/hydrogen exchanger 7
Cc02_g05160	GSCOC_T00039017001	1.50892997968569	Putative Pheophorbidase
Cc02_g18700	GSCOC_T00014422001	1.50758591952927	Putative autophagy 2
Cc06_g22380	GSCOC_T00017200001	1.5065981441975	Putative F-box protein At5g07610
Cc11_g11060	GSCOC_T00032489001	1.50389211641078	Putative Protein of unknown function (DUF1262)
Cc10_g04810	GSCOC_T00034890001	1.50353390713043	Putative Probable WRKY transcription factor 7
Cc03_g12950	GSCOC_T00030632001	1.50268967256569	Probable serine/threonine-protein kinase GCN2
Cc02_g12930	GSCOC_T00029220001	1.50122455415216	plus-3 domain-containing protein
Cc03_g02500	GSCOC_T00025896001	1.50061487423233	Putative uncharacterized protein
Cc02_g07660	GSCOC_T00029908001	1.49941217746199	Putative Telomere repeat-binding protein 4
Cc05_g10450	GSCOC_T00021439001	1.49927075669187	C2 domain-containing protein At1g53590
Cc07_g14630	GSCOC_T00036586001	1.49866131643876	Putative Protein SCAI
Cc05_g14470	GSCOC_T00038813001	1.49823667179325	ENHANCED DOWNY MILDEW 2
Cc09_g01260	GSCOC_T00017835001	1.49723053354576	O-fucosyltransferase family protein
Cc02_g35790	GSCOC_T00042794001	1.49700222797172	Putative uncharacterized protein
Cc11_g02320	GSCOC_T00032989001	1.49605626040116	Hypothetical protein
Cc03_g10880	GSCOC_T00042020001	1.49501085863164	Putative Ribosome biogenesis protein bms1
Cc05_g11510	GSCOC_T00021307001	1.49410349558604	Homogentisate 1,2-dioxygenase
Cc02_g26980	GSCOC_T00025009001	1.4934517173133	Callose synthase 1
Cc02_g27660	GSCOC_T00025100001	1.48905570741904	Putative Cysteine proteinases superfamily protein
Cc09_g00210	GSCOC_T00017978001	1.48641378570379	C2 and GRAM domain-containing protein At1g03370
Cc09_g09120	GSCOC_T00023096001	1.4851710241863	Putative RING/U-box superfamily protein
Cc07_g05800	GSCOC_T00039862001	1.48227986410682	Putative Patatin group A-3
Cc05_g08130	GSCOC_T00016824001	1.48176435541924	Putative unknown protein; Has 116 Blast hits to 113 proteins in 44 species
Cc01_g17540	GSCOC_T00016310001	1.48054576173059	Putative Myosin-J heavy chain
Cc11_g06670	GSCOC_T00020691001	1.47903757290372	Putative Heat stress transcription factor A-8
Cc02_g04400	GSCOC_T00020352001	1.47846983718015	Putative Structural maintenance of chromosomes protein 6
Cc02_g12750	GSCOC_T00029242001	1.47762663526826	SNF2 domain-containing protein / helicase domain-containing protein / zinc finger protein-related
Cc08_g14270	GSCOC_T00030244001	1.47564683736937	Hypothetical protein
Cc09_g00640	GSCOC_T00017919001	1.47342084342197	Scarecrow-like protein 13
Cc11_g15200	GSCOC_T00038025001	1.47256497340401	Senescence/dehydration-associated protein-related
Cc06_g16160	GSCOC_T00030728001	1.47241635228063	Putative disease resistance protein At1g50180
Cc08_g14180	GSCOC_T00030257001	1.47089471464796	Heat stress transcription factor B-2b
Cc04_g07130	GSCOC_T00022518001	1.47044276404528	LOB domain-containing protein 41
Cc02_g13850	GSCOC_T00029088001	1.47041635892327	Putative homeobox-1
Cc11_g17090	GSCOC_T00038265001	1.46866664779793	unknown protein; Has 44 Blast hits to 44 proteins in 12 species
Cc08_g03910	GSCOC_T00034188001	1.4665127858695	DEAD-box ATP-dependent RNA helicase 5
Cc07_g00090	GSCOC_T00019071001	1.46317400526381	E3 ubiquitin-protein ligase RGLG2
Cc02_g00770	GSCOC_T00019871001	1.46146853426626	Putative Flavanone 3-dioxygenase
Cc03_g01500	GSCOC_T00025764001	1.46127770071672	Putative Acyl-CoA dehydrogenase family member 10
Cc10_g08510	GSCOC_T00034380001	1.45909840492217	Golgi-body localisation protein domain ;RNA pol II promoter Fmp27 protein domain
Cc11_g13140	GSCOC_T00032220001	1.45827588060522	Putative Probable ran guanine nucleotide release factor
Cc03_g10100	GSCOC_T00031012001	1.45582420793473	Major allergen Pru ar 1
Cc05_g16360	GSCOC_T00038572001	1.454570431094	Phosphoglycerate kinase, cytosolic
Cc05_g03920	GSCOC_T00017313001	1.45417508010319	Uncharacterized protein
Cc10_g07200	GSCOC_T00034553001	1.44819216736277	BEST Arabidopsis thaliana protein match is
Cc01_g11790	GSCOC_T00028089001	1.4481750721602	Mitogen-activated protein kinase 3
Cc11_g13250	GSCOC_T00032206001	1.4471128001508	F-box/kelch-repeat protein SKIP11
Cc02_g08030	GSCOC_T00029860001	1.44709024560916	HSP20-like chaperones superfamily protein
Cc02_g00700	GSCOC_T00019860001	1.44619510117458	Putative NAC 014
Cc07_g08900	GSCOC_T00040282001	1.4375686542982	HEAT repeat-containing protein
Cc11_g10490	GSCOC_T00032570001	1.43752191725356	phytochrome and flowering time regulatory protein (PFT1)
Cc01_g10220	GSCOC_T00024105001	1.43643739843422	Pheophorbide a oxygenase, chloroplastic
Cc07_g11930	GSCOC_T00036940001	1.43568919868511	Putative Serine/threonine-protein kinase SRPK
Cc04_g13100	GSCOC_T00011379001	1.43263829310833	Uncharacterized protein At5g50100, mitochondrial
Cc02_g24610	GSCOC_T00028863001	1.43244479686556	Putative CCR4-NOT transcription complex subunit 1
Cc10_g09690	GSCOC_T00031512001	1.43243815731883	Patellin 1
Cc01_g12080	GSCOC_T00028129001	1.42802398179223	Receptor-like protein kinase HERK 1

## Sheet: eCO2_vs_aCO2_WW_down
Gene ID	TID	Protein Name	Log2FC
Cc09_g01950	GSCOC_T00017742001	Putative Cytochrome P450 77A3	-7.75364
Cc06_g16320	GSCOC_T00030710001	Cytochrome P450 93A1	-7.65404
Cc11_g07660	GSCOC_T00018021001	Putative late blight resistance protein homolog R1B-17	-7.61934
Cc05_g07600	GSCOC_T00016754001	Tyrosine aminotransferase	-7.53991
Cc00_g06550	GSCOC_T00005831001	Putative Gibberellin 20 oxidase 1	-7.49332
Cc00_g06630	GSCOC_T00007484001	Putative Bifunctional dihydroflavonol 4-reductase/flavanone 4-reductase	-5.20466
Cc05_g09310	GSCOC_T00002647001	Putative uncharacterized protein	-5.15696
Cc01_g05920	GSCOC_T00027420001	Protein GAST1	-4.44085
Cc09_g03130	GSCOC_T00017586001	GDSL esterase/lipase At5g33370	-4.08438
Cc03_g01290	GSCOC_T00025735001	Major allergen Pru ar 1	-4.06569
Cc00_g34570	GSCOC_T00006097001	CYP71AT2v1	-3.8477
Cc08_g07010	GSCOC_T00025295001	Putative Patatin group A-3	-3.82758
Cc01_g08250	GSCOC_T00015525001	Putative Receptor-like protein 12	-3.81767
Cc02_g16500	GSCOC_T00014143001	Hypothetical protein	-3.81104
Cc03_g09720	GSCOC_T00030959001	Probable aldo-keto reductase 2	-3.68433
Cc07_g01730	GSCOC_T00039349001	Hypothetical protein	-3.53757
Cc00_g30530	GSCOC_T00007195001	Putative Cytochrome P450 83B1	-3.49438
Cc00_g03120	GSCOC_T00003068001	Putative Annexin D4	-3.27859
Cc06_g22450	GSCOC_T00005214001	Putative Cytochrome P450 83B1	-3.18798
Cc00_g33660	GSCOC_T00007656001	Putative Protein kinase superfamily protein	-3.14089
Cc06_g01530	GSCOC_T00023375001	Glycerol-3-phosphate acyltransferase 6	-3.13297
Cc10_g14270	GSCOC_T00012017001	Pathogen-related protein	-2.95279
Cc04_g11500	GSCOC_T00037341001	Tropinone reductase homolog At1g07440	-2.87148
Cc06_g22490	GSCOC_T00012876001	UDP-glucose flavonoid 3-O-glucosyltransferase 6	-2.81932
Cc04_g02460	GSCOC_T00021918001	Hypothetical protein	-2.7723
Cc08_g10320	GSCOC_T00026996001	Vacuolar-processing enzyme	-2.6527
Cc01_g08910	GSCOC_T00023929001	Putative Pollen Ole e 1 allergen and extensin family protein	-2.57082
Cc07_g01740	GSCOC_T00039350001	Hypothetical protein	-2.5637
Cc06_g19980	GSCOC_T00022889001	Putative Endoribonuclease Dicer homolog 2	-2.49853
Cc03_g10090	GSCOC_T00031011001	Major allergen Pru ar 1	-2.49451
Cc05_g02500	GSCOC_T00020945001	GDSL esterase/lipase At2g04570	-2.46575
Cc00_g14140	GSCOC_T00004713001	Dynamin-related protein 4C	-2.43847
Cc06_g02060	GSCOC_T00023446001	Putative Encodes a protein involved in salt tolerance, names SIS (Salt Induced Serine rich).	-2.43537
Cc00_g10990	GSCOC_T00000137001	Secologanin synthase	-2.31402
Cc10_g12740	GSCOC_T00031993001	NAD kinase 2, chloroplastic	-2.31382
Cc10_g10160	GSCOC_T00031448001	Dammarenediol II synthase	-2.14982
Cc08_g11060	GSCOC_T00027097001	Putative Probable WRKY transcription factor 50	-2.11741
Cc03_g09610	GSCOC_T00030945001	Putative UDP-glycosyltransferase 76E11	-2.05977
Cc11_g09680	GSCOC_T00032688001	Hypothetical protein	-2.03278
Cc00_g03780	GSCOC_T00002036001	AAA-ATPase 1	-2.01736
Cc04_g09420	GSCOC_T00022830001	Putative uncharacterized protein	-1.96833
Cc04_g02380	GSCOC_T00021909001	GDSL esterase/lipase APG	-1.92704
Cc03_g10910	GSCOC_T00042031001	Cytochrome P450 71A2	-1.88031
Cc00_g15670	GSCOC_T00008808001	Putative Omega-hydroxypalmitate O-feruloyl transferase	-1.82432
