# Supplementary material for: Overexpression of Water-Responsive Genes Promoted by Elevated CO2 Reduces ROS and Enhances Drought Tolerance in Coffea Species
Source: Int J Mol Sci. 2023 Feb 6;24(4):3210. doi: 10.3390/ijms24043210 (PMC9966387; doi:10.3390/ijms24043210)
Supplement: Supplementary file 1 [file ijms-24-03210-s001.zip › Table_S6.xlsx]

## Sheet: Sheet1
Gene ID	Protein Name	MWDa vs WWa	SWDa vs WWa	MWDe vs WWe	SWDe vs WWe
Respiration
LOC113695217	ribosomal protein S2, mitochondrial-like isoform X1	-5.25	-4.21
LOC113700039	thaumatin-like protein 1		-6.05		-5.97
LOC113698717	3-ketoacyl-CoA synthase 6-like	-1.89	-5.4		-5.69
LOC113701649	3-ketoacyl-CoA synthase 6		-6.84		-6.83
LOC113739647	heat shock 70 kDa protein-like	6.14	7.28		6.64
LOC113716652	uncharacterized protein LOC113716652		2.29		3.94
LOC113718867	uncharacterized protein LOC113718867		2.17		3.48
LOC113716426	3-ketoacyl-CoA synthase 6-like		-6.34		-4.92
LOC113701137	pathogenesis-related protein 5-like	-4.51	-6.87		-6.46
LOC113718711	3-ketoacyl-CoA synthase 6-like	-2.51	-7.81		-9.53
LOC113718845	alpha-xylosidase 1-like		-3.26		-3.61
LOC113713327	annexin D1-like		2.13		3.2
LOC113708902	pterin-4-alpha-carbinolamine dehydratase 2, mitochondrial-like isoform X2		2.04		2.3
LOC113714316	allene oxide synthase-like				-3.53
LOC113697378	temperature-induced lipocalin-1-like				2.68
LOC113708785	putative 12-oxophytodienoate reductase 11		6.45		7.01
LOC113701029	thaumatin-like protein 1		-5.27		-3.87
LOC113707439	LRR receptor-like serine/threonine-protein kinase ERECTA isoform X1		-3.62		-3.59
LOC113708647	two-component response regulator-like PRR37 isoform X1				-2.39
LOC113730185	heat shock 22 kDa protein, mitochondrial-like				2.49
LOC113702672	LRR receptor-like serine/threonine-protein kinase ERECTA				-2.83
LOC113739943	peptidyl-prolyl cis-trans isomerase CYP26-2, chloroplastic-like isoform X3		-3.81		-3.2
LOC113709442	putative 12-oxophytodienoate reductase 11		4.38		4.81
LOC113691905	magnesium-chelatase subunit ChlH, chloroplastic		-3.04		-2.47
LOC113715606	HIPL1 protein-like isoform X2		-2.63		-2.08
LOC113715194	calcium uniporter protein 4, mitochondrial-like		3.1		3.06
LOC113692720	defensin-like protein P322		5.1		7.22
LOC113694841	magnesium-chelatase subunit ChlH, chloroplastic-like isoform X2		-3.02		-2.25
LOC113704105	aspartate aminotransferase, cytoplasmic				2.37
LOC113688192	kinesin-like protein KIN-14F isoform X3				-4.17
LOC113710291	two-component response regulator-like PRR37 isoform X2				-1.89
LOC113719667	kirola-like				-3.75
LOC113709204	pterin-4-alpha-carbinolamine dehydratase 2, mitochondrial-like isoform X2				2
LOC113726261	protein NUCLEAR FUSION DEFECTIVE 4-like			-2.07	-2.91
LOC113719591	cysteine-rich receptor-like protein kinase 3 isoform X2				-2.02
LOC113699099	glutamate decarboxylase isoform X2				2.1
LOC113725158	heat shock 22 kDa protein, mitochondrial-like				2.02
LOC113688553	fasciclin-like arabinogalactan protein 7	-5.97	-6.62		-9
LOC113738189	elongation factor Tu, mitochondrial-like				2.65
LOC113726265	thaumatin-like protein 1				-8.73
LOC113688101	protein THYLAKOID FORMATION1, chloroplastic				-1.38
LOC113703085	glycine cleavage system H protein, mitochondrial-like				-1.68
LOC113688543	phosphoenolpyruvate carboxylase-like		-4.07		-3.4
LOC113732340	protein RETICULATA-RELATED 4, chloroplastic-like isoform X2		-2.45		-2.22
LOC113709724	ATP synthase gamma chain, chloroplastic-like		-2.56		-1.75
LOC113711936	alanine--glyoxylate aminotransferase 2 homolog 3, mitochondrial-like				3.02
LOC113743529	uncharacterized protein LOC113743529				-2.32
LOC113712215	probable beta-D-xylosidase 7	-6.18	-6.15		-5.2
LOC113726116	protein IQ-DOMAIN 1-like		-2.93		-2.42
LOC113707198	aspartate aminotransferase, cytoplasmic-like				1.81
LOC113743471	chlorophyll a-b binding protein 36, chloroplastic		-2.49		-2.17
LOC113689822	chlorophyll a-b binding protein 36, chloroplastic		-2.4		-2.09
LOC113718216	protein SENESCENCE-ASSOCIATED GENE 21, mitochondrial-like				1.63
LOC113692098	cytochrome P450 71A1-like				-7.94
LOC113742355	thaumatin-like protein	-4.42	-8.36		-8.26
LOC113707866	bifunctional dihydrofolate reductase-thymidylate synthase-like isoform X4		-1.87		-2.25
LOC113699382	protein IQ-DOMAIN 31-like		-2.48		-1.82
LOC113717245	thioredoxin H2-like				-3.55
LOC113742829	peptidyl-prolyl cis-trans isomerase CYP26-2, chloroplastic isoform X1		-4.29		-3.4
LOC113702480	glutamate decarboxylase-like	-2.79			1.49
LOC113716920	fructose-bisphosphate aldolase 3, chloroplastic				1.76
LOC113691073	phosphoenolpyruvate carboxylase				-3.13
LOC113730137	CDGSH iron-sulfur domain-containing protein NEET-like isoform X2				1.64
LOC113714206	CLIP-associated protein-like				-1.68
LOC113690330	multiple organellar RNA editing factor 8, chloroplastic/mitochondrial-like				1.57
LOC113730638	LOW QUALITY PROTEIN: internal alternative NAD(P)H-ubiquinone oxidoreductase A1, mitochondrial-like		-2.4		-1.96
LOC113733163	AT-hook motif nuclear-localized protein 9-like				-2.68
LOC113710048	LOW QUALITY PROTEIN: BAG family molecular chaperone regulator 3-like		-1.86		-1.97
LOC113736371	glycine-rich RNA-binding protein 4, mitochondrial-like				1.6
LOC113688846	chaperone protein dnaJ C76, chloroplastic-like		-2.03		-1.82
LOC113713838	probable beta-D-xylosidase 7	-4.2	-5.98		-3.58
LOC113713517	protein SPA, chloroplastic-like				-2.03
LOC113731226	kinesin-like protein KIN-7D, mitochondrial		-2.38		-2.1
LOC113698881	leucine-rich repeat receptor-like serine/threonine-protein kinase BAM1	-2.59	-2.89		-1.83
LOC113701085	AAA-ATPase At3g50940-like				-2.3
LOC113730505	heat shock cognate 70 kDa protein 2-like				1.37
LOC113743195	grpE protein homolog 1, mitochondrial-like isoform X2				1.87
LOC113736968	kirola-like		-4	-3.14	-2.56
LOC113731154	protein NUCLEAR FUSION DEFECTIVE 4-like				-3.58
LOC113717721	multicopper oxidase LPR2-like				-1.42
LOC113701838	pyridoxine/pyridoxamine 5'-phosphate oxidase 1, chloroplastic-like		3.16		2.1
LOC113701851	serine hydroxymethyltransferase, mitochondrial				-1.39
LOC113728055	AT-hook motif nuclear-localized protein 9-like				-2.51
LOC113740490	hydroxymethylglutaryl-CoA lyase, mitochondrial-like				1.88
LOC113717763	transmembrane 9 superfamily member 2-like isoform X1				-2.94
LOC113692063	subtilisin-like protease SBT1.8		-4.31		-3.08
LOC113712481	protein SPA, chloroplastic-like				-1.95
LOC113688118	phosphoglycerate kinase, chloroplastic		-2.87		-1.79
LOC113709680	aminomethyltransferase, mitochondrial		-3.53		-1.83
LOC113687901	glucan endo-1,3-beta-glucosidase 12		-3.07		-2.17
LOC113697465	protein phosphatase 2C and cyclic nucleotide-binding/kinase domain-containing protein-like isoform X2				-1.59
LOC113705212	probable phospholipid hydroperoxide glutathione peroxidase				1.55
LOC113708507	formate dehydrogenase, mitochondrial-like isoform X1				-1.75
LOC113742146	geranylgeranyl diphosphate reductase, chloroplastic		-2.44		-1.97
LOC113708606	aminomethyltransferase, mitochondrial-like		-2.88		-1.62
LOC113689804	glycine-rich RNA-binding protein 4, mitochondrial-like isoform X2				1.55
LOC113724937	plastidial pyruvate kinase 2-like				1.55
LOC113731843	thaumatin-like protein				-2.57
LOC113694288	protein IQ-DOMAIN 14				-1.8
LOC113712506	LOW QUALITY PROTEIN: mitochondrial uncoupling protein 4-like				2.58
LOC113713509	LOW QUALITY PROTEIN: isoflavone reductase homolog TP7-like				-4.96
LOC113711255	internal alternative NAD(P)H-ubiquinone oxidoreductase A1, mitochondrial-like		-2.42		-1.68
LOC113719669	transmembrane 9 superfamily member 2-like isoform X3				-2.27
LOC113735307	alkaline/neutral invertase A, mitochondrial-like				1.58
LOC113741792	uncharacterized protein LOC113741792		3.44		3.41
LOC113690948	clathrin light chain 1-like isoform X1				3.07
LOC113694584	protein RETICULATA-RELATED 1, chloroplastic-like isoform X2				-2.09
LOC113698380	LOW QUALITY PROTEIN: proline dehydrogenase 2, mitochondrial-like				3.08
LOC113708079	farnesyl pyrophosphate synthase 1 isoform X2				-2.15
LOC113704043	dynamin-related protein 1E-like isoform X2				-2.65
LOC113694025	mitochondrial carrier protein CoAc2-like		2.86		1.55
LOC113712916	putative 12-oxophytodienoate reductase 11 isoform X1				-1.5
LOC113725498	methionine--tRNA ligase, chloroplastic/mitochondrial-like				-1.41
LOC113726544	malate dehydrogenase, glyoxysomal-like isoform X1		-2.82		-1.49
LOC113701327	probable hexokinase-like 2 protein isoform X1		-3.13		-2.27
LOC113708913	lysM domain-containing GPI-anchored protein 2-like		-3.11		-1.92
LOC113714791	hexokinase-2, chloroplastic	-3.37	-4.82		-4.19
LOC113703781	protein TRIGALACTOSYLDIACYLGLYCEROL 4, chloroplastic-like isoform X1				-1.47
LOC113739495	LOW QUALITY PROTEIN: protein RETICULATA-RELATED 4, chloroplastic-like				-1.86
LOC113690998	thiamine thiazole synthase, chloroplastic-like				1.78
LOC113738809	single-stranded DNA-binding protein, mitochondrial-like				2
LOC113712265	psbP domain-containing protein 3, chloroplastic isoform X2				-1.45
LOC113731758	malate dehydrogenase, cytoplasmic-like		-4.51		-2.72
LOC113707354	EG45-like domain containing protein				-3.18
LOC113701246	proline dehydrogenase 2, mitochondrial-like isoform X1				2.6
LOC113689879	elongation factor Ts, mitochondrial isoform X2				1.84
LOC113731180	snakin-2			2.93	-2.7
LOC113717726	MLP-like protein 34				-1.69
LOC113732077	NADH dehydrogenase [ubiquinone				1.46
LOC113732426	protein IQ-DOMAIN 14-like				3.12
LOC113698415	TMV resistance protein N-like				1.49
LOC113714201	LOW QUALITY PROTEIN: CLIP-associated protein-like				-1.96
LOC113703366	EG45-like domain containing protein				-1.8
LOC113743532	photosystem II 10 kDa polypeptide, chloroplastic-like		-2.27		-1.52
LOC113735163	protein STRICTOSIDINE SYNTHASE-LIKE 11-like				-4.27
LOC113718296	cytochrome P450 71A1-like	-3.52	-9.54		-5.91
LOC113731027	protein IQ-DOMAIN 1-like				-1.65
LOC113702765	TMV resistance protein N-like isoform X1				-2.57
LOC113725872	pentatricopeptide repeat-containing protein At1g55890, mitochondrial-like				1.59
LOC113694151	stress-response A/B barrel domain-containing protein UP3-like	-3.15
LOC113695736	actin-1	-2.14	-1.87
LOC113701531	AAA-ATPase ASD, mitochondrial-like	-3.9	-3.51
LOC113717034	leucoanthocyanidin reductase-like isoform X2	-3.36
LOC113700985	AAA-ATPase ASD, mitochondrial-like	-2.26	-2.12
LOC113701240	ribulose bisphosphate carboxylase small chain SSU11A, chloroplastic-like isoform X2		-2.79
LOC113690443	phosphoglycerate kinase, chloroplastic-like		-2.48
LOC113708959	mitochondrial carnitine/acylcarnitine carrier-like protein		-1.89
LOC113710262	mitochondrial carnitine/acylcarnitine carrier-like protein		-2.34
LOC113698165	ribulose bisphosphate carboxylase small chain SSU8, chloroplastic-like		-2.27
LOC113717117	multicopper oxidase LPR2-like		-2.76
LOC113738184	glutamine synthetase leaf isozyme, chloroplastic-like		-1.9
LOC113742241	elongation factor TuB, chloroplastic		-1.84
LOC113708818	glycerate dehydrogenase-like		-1.83
LOC113731577	malate dehydrogenase, glyoxysomal-like		-2.33
LOC113690713	photosystem II 10 kDa polypeptide, chloroplastic		-1.91
LOC113716478	phosphoenolpyruvate carboxylase 4		-1.82
LOC113692324	dynamin-related protein 4C-like		-3.98
LOC113714501	30S ribosomal protein S9, chloroplastic-like		-1.87
LOC113726036	30S ribosomal protein S5, chloroplastic-like		-1.84
LOC113697364	probable alpha,alpha-trehalose-phosphate synthase [UDP-forming		2.83
LOC113713775	LOW QUALITY PROTEIN: endoplasmin homolog		-2.07
LOC113727738	putative pentatricopeptide repeat-containing protein At1g12700, mitochondrial		2.53
LOC113716835	kirola-like			-2.74
LOC113700787	isoflavone reductase homolog TP7-like
LOC113698466	transmembrane 9 superfamily member 3
LOC113727358	LOW QUALITY PROTEIN: cytochrome P450 98A2-like
LOC113732560	cytochrome P450 98A2-like
LOC113709327	alpha-glucosidase-like
Antioxidant activity
LOC113727829	galactinol synthase 2-like	2.99	4.29		6.07
LOC113733000	galactinol synthase 2-like		4.89	3.45	5.79
LOC113701179	peroxidase 51-like	-4.26	-6.59		-6.71
LOC113695644	class I heat shock protein-like		3.59		6.81
LOC113692853	probable galactinol--sucrose galactosyltransferase 6		3.07		3.6
LOC113697863	peroxidase 51-like	-3.46			-6.83
LOC113727830	galactinol synthase 2-like		4.91		5.43
LOC113690410	peroxidase 4-like	-2.49	-5.48		-5.43
LOC113717790	cell number regulator 7-like	-2.71	-6.16		-6.64
LOC113694109	zinc finger CCCH domain-containing protein 20-like		2.81		3.61
LOC113730422	17.4 kDa class I heat shock protein-like				3.28
LOC113692361	LOW QUALITY PROTEIN: class I heat shock protein-like				5.48
LOC113713327	annexin D1-like		2.13		3.2
LOC113726693	peroxidase 43-like	-2.56	-4.13		-3.62
LOC113697378	temperature-induced lipocalin-1-like				2.68
LOC113695985	probable galactinol--sucrose galactosyltransferase 6				2.61
LOC113697788	protein ACTIVITY OF BC1 COMPLEX KINASE 8, chloroplastic-like				-1.76
LOC113706341	glutathione S-transferase T1-like				1.78
LOC113734529	selenium-binding protein 1-like				2.44
LOC113717780	18.5 kDa class I heat shock protein-like	4.95	3.09		3.34
LOC113715777	cell number regulator 9-like isoform X2		-3.64		-2.84
LOC113726525	zinc finger protein ZAT10-like		4.46		3.54
LOC113729577	17.5 kDa class I heat shock protein-like				2.62
LOC113732999	galactinol synthase 2-like		2.6		3.19
LOC113708682	peroxidase 42-like	-2.97	-4.52		-3.82
LOC113698722	glutaredoxin-like				2.05
LOC113716953	protein PLANT CADMIUM RESISTANCE 2-like		-3.01		-2.65
LOC113702948	glutathione S-transferase T1-like		3.33		3.56
LOC113700485	protein ACTIVITY OF BC1 COMPLEX KINASE 8, chloroplastic				-1.44
LOC113717816	probable galactinol--sucrose galactosyltransferase 2		-4.63		-2.91
LOC113707670	transcription termination factor MTEF1, chloroplastic-like		-2.62		-2.87
LOC113699944	alpha-dioxygenase 1-like				2.73
LOC113706342	glutathione S-transferase T1-like		3.26		3.07
LOC113710359	17.3 kDa class I heat shock protein-like		2.17		3.01
LOC113697228	probable galactinol--sucrose galactosyltransferase 2		2.63		2.38
LOC113734308	plastid-lipid-associated protein 6, chloroplastic		-1.9		-1.53
LOC113715779	protein PLANT CADMIUM RESISTANCE 2-like				-6.88
LOC113730421	18.2 kDa class I heat shock protein-like				2.27
LOC113711983	peroxidase 4-like				-5.97
LOC113733849	galactinol synthase 2-like isoform X3				2.62
LOC113692869	mechanosensitive ion channel protein 10-like isoform X3				-2.17
LOC113710318	peroxidase 42-like	-3.17	-6.18		-5.34
LOC113692737	mechanosensitive ion channel protein 10-like		-3.75		-3.4
LOC113711139	LOW QUALITY PROTEIN: zinc finger protein ZAT10-like		3.09		2.16
LOC113718216	protein SENESCENCE-ASSOCIATED GENE 21, mitochondrial-like				1.63
LOC113716920	fructose-bisphosphate aldolase 3, chloroplastic				1.76
LOC113718814	protein PLANT CADMIUM RESISTANCE 2-like				-3.04
LOC113707447	pleiotropic drug resistance protein 1-like				-2.04
LOC113707937	cell number regulator 9-like				-6.53
LOC113695405	uncharacterized protein LOC113695405				3.11
LOC113731964	22.0 kDa class IV heat shock protein-like	5.72	4.22		4.35
LOC113716754	probable galactinol--sucrose galactosyltransferase 2		-2.5		-2.2
LOC113712193	thylakoid lumenal 29 kDa protein, chloroplastic-like isoform X2		-2.44		-1.81
LOC113694867	blue copper protein-like				2.82
LOC113730933	S-linalool synthase-like				4.38
LOC113695350	NADPH-dependent oxidoreductase 2-alkenal reductase-like				-7.32
LOC113701593	PLAT domain-containing protein 3-like	-7.32	-8		-6.22
LOC113697049	2-alkenal reductase (NADP(+)-dependent)-like		-2.08		-1.77
LOC113725320	wound-induced protein 1-like				-1.88
LOC113738017	galactinol synthase 2-like				2.6
LOC113715210	thylakoid lumenal 29 kDa protein, chloroplastic-like isoform X2				-1.49
LOC113691694	heat shock factor protein HSF30-like				1.83
LOC113705212	probable phospholipid hydroperoxide glutathione peroxidase				1.55
LOC113741763	17.4 kDa class III heat shock protein-like				1.87
LOC113691939	probable transcription factor At5g61620				-2.04
LOC113701871	peroxidase 64-like isoform X1				-7.1
LOC113713509	LOW QUALITY PROTEIN: isoflavone reductase homolog TP7-like				-4.96
LOC113735307	alkaline/neutral invertase A, mitochondrial-like				1.58
LOC113708595	L-ascorbate peroxidase, cytosolic-like				1.59
LOC113742142	pleiotropic drug resistance protein 1-like				1.43
LOC113698380	LOW QUALITY PROTEIN: proline dehydrogenase 2, mitochondrial-like				3.08
LOC113701327	probable hexokinase-like 2 protein isoform X1		-3.13		-2.27
LOC113739654	17.4 kDa class III heat shock protein-like				1.73
LOC113730444	mannose-1-phosphate guanylyltransferase 1				-1.6
LOC113709253	transcription termination factor MTEF1, chloroplastic-like		-2.22		-1.94
LOC113691066	peroxidase 3-like		3.71		2.83
LOC113701246	proline dehydrogenase 2, mitochondrial-like isoform X1				2.6
LOC113734036	peptide methionine sulfoxide reductase B5-like		-3.01		-1.42
LOC113692559	peroxidase 16-like				1.69
LOC113730118	peroxidase 66-like				-5
LOC113728228	LOW QUALITY PROTEIN: L-ascorbate peroxidase 2, cytosolic-like				1.66
LOC113699229	UDP-glycosyltransferase 74E2-like				2.46
LOC113704304	protein LOL1 isoform X2		-2.51		-1.96
LOC113736192	plastid-lipid-associated protein 6, chloroplastic-like				-2.68
LOC113707377	protein LOL1-like isoform X2				-1.86
LOC113742144	pleiotropic drug resistance protein 1-like				-1.56
LOC113738600	purple acid phosphatase 17-like	-4.95
LOC113741493	purple acid phosphatase 17-like	-4.05
LOC113734419	chalcone synthase 2-like	-6.59
LOC113736283	chalcone synthase 2	-5.35	-3.58
LOC113734418	chalcone synthase 2-like	-5.54	-4.08
LOC113694958	cationic peroxidase 1-like	-5.8	-4.25
LOC113730287	wound-induced protein 1-like	-1.9
LOC113717777	glutathione S-transferase-like	-2.72
LOC113701398	BTB/POZ and TAZ domain-containing protein 4-like	-4.14
LOC113717034	leucoanthocyanidin reductase-like isoform X2	-3.36
LOC113716952	protein PLANT CADMIUM RESISTANCE 2-like	-2.03	-3.11
LOC113697429	peroxidase 25-like	-2.87
LOC113707625	phenylalanine ammonia-lyase G4-like	-3.04	-3.42
LOC113736281	chalcone synthase 2-like		-3
LOC113725801	phenylalanine ammonia-lyase		-3.12
LOC113698367	glutathione hydrolase 1-like		-2.58
LOC113691470	thioredoxin reductase NTRC-like		-2.04
LOC113727571	phenylalanine ammonia-lyase G4-like		-3.05
LOC113700787	isoflavone reductase homolog TP7-like
LOC113733440	WRKY DNA-binding transcription factor 70-like
Lipid metabolism
LOC113706389	probable carotenoid cleavage dioxygenase 4, chloroplastic		-2.72		-2.44
LOC113690394	homogentisate 1,2-dioxygenase		2.45		1.93
LOC113703222	probable carotenoid cleavage dioxygenase 4, chloroplastic				-1.77
LOC113727527	mediator of RNA polymerase II transcription subunit 15a-like isoform X1
LOC113732840	probable linoleate 9S-lipoxygenase 5	-2.09	-4.63		-6.86
LOC113734200	3-ketoacyl-CoA synthase 11-like				-5.39
LOC113710008	delta(12)-acyl-lipid-desaturase-like		-4.4		-6.07
LOC113718905	long chain acyl-CoA synthetase 1-like		-4.26		-4.64
LOC113739952	GDSL esterase/lipase At3g48460		-3.71		-4.9
LOC113698717	3-ketoacyl-CoA synthase 6-like	-1.89	-5.4		-5.69
LOC113701649	3-ketoacyl-CoA synthase 6		-6.84		-6.83
LOC113716426	3-ketoacyl-CoA synthase 6-like		-6.34		-4.92
LOC113700062	serine/threonine-protein kinase SAPK1-like isoform X3		-2.88		-4
LOC113702113	serine/threonine-protein kinase SAPK1-like isoform X3		-3.15		-4.26
LOC113718711	3-ketoacyl-CoA synthase 6-like	-2.51	-7.81		-9.53
LOC113725022	oxalate--CoA ligase-like				3
LOC113725542	3-ketoacyl-CoA synthase 19-like	-3.63	-8.6		-8.98
LOC113729600	non-symbiotic hemoglobin 2-like				3.27
LOC113714316	allene oxide synthase-like				-3.53
LOC113708785	putative 12-oxophytodienoate reductase 11		6.45		7.01
LOC113730704	cytochrome P450 77A2-like	-2.81	-6		-6.33
LOC113701701	probable acyl-activating enzyme 5, peroxisomal		2.12		3.31
LOC113700875	linoleate 13S-lipoxygenase 2-1, chloroplastic-like				-3.61
LOC113741991	palmitoyl-monogalactosyldiacylglycerol delta-7 desaturase, chloroplastic-like				-2.73
LOC113699301	probable acyl-activating enzyme 5, peroxisomal		2.21		2.65
LOC113705259	3-ketoacyl-CoA synthase 11-like				-2.78
LOC113709442	putative 12-oxophytodienoate reductase 11		4.38		4.81
LOC113725699	cytochrome P450 77A2-like		-4.3		-3.47
LOC113714420	jasmonate O-methyltransferase-like isoform X2	-4.77	-6.66		-6.81
LOC113704294	3-ketoacyl-CoA synthase 11-like		-2.2		-2.88
LOC113732766	oleoyl-acyl carrier protein thioesterase, chloroplastic-like		-2.98		-2.61
LOC113727628	probable linoleate 9S-lipoxygenase 5				-4.74
LOC113706796	protein HOTHEAD-like		-3.86		-3.82
LOC113730063	oxalate--CoA ligase-like				2.41
LOC113699944	alpha-dioxygenase 1-like				2.73
LOC113705072	anthranilate N-benzoyltransferase protein 2-like		-5.82		-5.41
LOC113714586	linoleate 13S-lipoxygenase 2-1, chloroplastic-like				-3.05
LOC113705303	uncharacterized protein LOC113705303		-5.21		-6.34
LOC113742222	protein HOTHEAD				-7.84
LOC113730631	omega-3 fatty acid desaturase, endoplasmic reticulum-like				-2.06
LOC113693992	delta(12)-fatty-acid desaturase FAD2-like				-2.58
LOC113688131	fatty acid hydroperoxide lyase, chloroplastic-like				-1.53
LOC113707236	4-coumarate--CoA ligase-like 7				1.44
LOC113740087	LOW QUALITY PROTEIN: palmitoyl-monogalactosyldiacylglycerol delta-7 desaturase, chloroplastic-like				-1.84
LOC113703052	protein HOTHEAD-like		-5.85		-4.13
LOC113697896	probable acyl-activating enzyme 6	-3.75	-8.43		-5.64
LOC113713648	oleoyl-acyl carrier protein thioesterase, chloroplastic-like		-2.1		-1.74
LOC113733368	3-ketoacyl-CoA synthase 1-like		-3.16		-2.27
LOC113688924	two pore calcium channel protein 1B-like isoform X2				1.47
LOC113718708	acyl carrier protein 1, chloroplastic-like isoform X2		-4.7		-2.44
LOC113724937	plastidial pyruvate kinase 2-like				1.55
LOC113702461	probable acyl-activating enzyme 6	-3.98	-8.98		-8.96
LOC113712916	putative 12-oxophytodienoate reductase 11 isoform X1				-1.5
LOC113726544	malate dehydrogenase, glyoxysomal-like isoform X1		-2.82		-1.49
LOC113716137	acetyl-coenzyme A synthetase, chloroplastic/glyoxysomal-like				-2.83
LOC113743184	two pore calcium channel protein 1B-like isoform X2				1.53
LOC113734199	3-ketoacyl-CoA synthase 20-like				-3.19
LOC113707209	LOW QUALITY PROTEIN: cytochrome P450 86A22-like	-5.02	-7.6		-6.33
LOC113728079	cytochrome P450 86A8-like				-3.79
LOC113692029	monogalactosyldiacylglycerol synthase 2, chloroplastic-like				-2.34
LOC113699651	probable acyl-activating enzyme 18, peroxisomal isoform X2		-2.25		-1.48
LOC113703864	cytochrome P450 86A22	-6.72	-10.22
LOC113732466	benzyl alcohol O-benzoyltransferase-like	-2.53
LOC113738042	ATP-citrate synthase beta chain protein 2	-2.02
LOC113731577	malate dehydrogenase, glyoxysomal-like		-2.33
LOC113706907	3-ketoacyl-CoA synthase 10		-1.84
LOC113728215	3-ketoacyl-CoA synthase 1		-2.48
LOC113734497	protein ECERIFERUM 26-like		-2.19
