# Supplementary material for: Overexpression of Water-Responsive Genes Promoted by Elevated CO2 Reduces ROS and Enhances Drought Tolerance in Coffea Species
Source: Int J Mol Sci. 2023 Feb 6;24(4):3210. doi: 10.3390/ijms24043210 (PMC9966387; doi:10.3390/ijms24043210)
Supplement: Supplementary file 1 [file ijms-24-03210-s001.zip › Table_S7.xlsx]

## Sheet: Sheet1
Gene ID	Protein Name	MWDa vs WWa	SWDa vs WWa	MWDe vs WWe	SWDe vs WWe
Respiration
Cc05_g11180	Phosphoenolpyruvate carboxylase	-3.77	-3.64		-4.49
Cc08_g02390	Glycine cleavage system H protein, mitochondrial				-2.77
Cc03_g15980	Outer envelope pore protein 37, chloroplastic				-2.13
Cc09_g01490	Aminomethyltransferase, mitochondrial	-2.79	-3.4		-3.28
Cc11_g10810	Phosphoenolpyruvate carboxylase 4		-1.71		-2.74
Cc06_g13830	Probable alpha,alpha-trehalose-phosphate synthase [UDP-forming] 11	2.99	3.92		4.48
Cc04_g15520	Putative Mitochondrial outer membrane protein porin of 36 kDa	-5.67	-9.79		-5.08
Cc02_g20400	Malate dehydrogenase, glyoxysomal		-2.29		-2.43
Cc07_g00790	Sulfite oxidase				-1.85
Cc08_g01750	Cytochrome c oxidase subunit 6b-3	-5.66	-5.08		-7.13
Cc04_g07800	Calcium sensing receptor, chloroplastic		-2.1		-2.38
Cc03_g02560	NADH dehydrogenase [ubiquinone] 1 alpha subcomplex subunit 8-B				-1.63
Cc09_g06160	Formate dehydrogenase, mitochondrial		-2.45		-2.19
Cc07_g14260	Putative Probable mitochondrial 2-oxoglutarate/malate carrier protein		-1.84		-2.1
Cc00_g21200	Plant neutral invertase family protein		1.88		1.77
Cc03_g02940	Glutamine synthetase leaf isozyme, chloroplastic		-1.93		-1.53
Cc02_g38200	Cysteine synthase, chloroplastic/chromoplastic				-1.5
Cc01_g13710	Putative Mitochondrial uncoupling protein 3		-1.91		-2.19
Cc00_g28880	P-loop containing nucleoside triphosphate hydrolases superfamily protein				2.6
Cc02_g25620	FUNCTIONS IN				-2.22
Cc04_g10080	Malate synthase, glyoxysomal		2.7
Cc11_g17430	Pyruvate dehydrogenase E1 component subunit beta, mitochondrial		2.79
Cc06_g11140	Putative Graves disease carrier protein		2.12
Cc02_g00270	Putative ATPase family AAA domain-containing protein 3-A		1.98
Cc02_g27440	Putative Chaperone protein dnaJ 1, mitochondrial		1.59
Cc07_g07860	Heat shock 70 kDa protein, mitochondrial		1.77
Cc01_g19410	Chalcone-flavanone isomerase family protein		-1.96
Cc02_g21470	Outer envelope protein 64, mitochondrial		1.76
Cc02_g09270	Mitochondrial glycoprotein family protein		1.63
Cc07_g05140	Hypothetical protein		2.84
Cc07_g05130	Putative Protein of unknown function (DUF607)		2.8
Antioxidant activity
Cc07_g14740	Peroxidase 17	4.3	5.18		3.87
Cc03_g02760	Peptide methionine sulfoxide reductase B3, chloroplastic	-2.68	-3.56		-4.13
Cc10_g15150	Peroxidase 12		4.95		4.56
Cc06_g12610	Peroxiredoxin Q, chloroplastic		-2.21		-2.29
Cc10_g06720	Thylakoid lumenal 29 kDa protein, chloroplastic				-2.18
Cc07_g11720	Catalase isozyme 2				-3.76
Cc04_g04320	Putative Tetratricopeptide repeat (TPR)-like superfamily protein				-1.86
Cc03_g02460	Superoxide dismutase [Cu-Zn]				-2.37
Cc06_g06390	Putative 1-cysteine peroxiredoxin 1				-1.43
Cc10_g08080	Receptor-like protein kinase HAIKU2				1.7
Cc08_g11220	peptidyl-prolyl cis-trans isomerases		-2.95		-2.5
Cc06_g05140	Peroxiredoxin-2E, chloroplastic				-1.8
Cc06_g13090	Peroxidase 16		-3.4		-2.47
Cc10_g00570	Catalase		3.26		1.94
Cc09_g01700	Peroxidase 42		-1.98		-2.93
Cc06_g08070	Probable galactinol--sucrose galactosyltransferase 6	3.51	2.78		1.83
Cc07_g02500	Peroxidase superfamily protein				1.75
Cc07_g02590	Peroxidase 63		-2.6		-2.51
Cc01_g10280	Superoxide dismutase [Cu-Zn], chloroplastic				-2.32
Cc07_g11020	L-ascorbate peroxidase 3, peroxisomal				-3.87
Cc07_g02770	Probable galacturonosyltransferase-like 9	3.76			2.76
Cc00_g17550	Peroxidase 3	4.17	2.78
Cc07_g06870	Peroxidase 73		-2.7
Cc05_g08480	Peroxidase 4		-2.63
Cc06_g00570	Cationic peroxidase 1		-2.22
Cc11_g10330	Putative uncharacterized protein		-1.71
Cc00_g20670	NAD(P)H dehydrogenase 18		-1.76
Cc07_g11210	Peroxidase 64		-4.19
Cc06_g03490	L-ascorbate peroxidase 2, cytosolic		3.38
Lipid metabolism (FAD/LOX)
Cc11_g10190	3-ketoacyl-CoA synthase 6	-5.11	-4.63		-3.47
Cc08_g11520	Putative HXXXD-type acyl-transferase family protein	-4.33	-8.65		-5.02
Cc03_g04570	3-ketoacyl-CoA synthase 17	-3.85	-4.6		-4.44
Cc11_g17510	Acyl carrier protein 1, chloroplastic	-2.73	-2.4		-3.33
Cc11_g10180	3-ketoacyl-CoA synthase 6	7.09	8.3		9.03
Cc04_g04380	Palmitoyl-monogalactosyldiacylglycerol delta-7 desaturase, chloroplastic				-1.93
Cc11_g16580	3-oxoacyl-[acyl-carrier-protein] reductase, chloroplastic				-1.67
Cc06_g09070	3-ketoacyl-CoA synthase 11	2.3	3.37		3.5
Cc01_g16760	Oleoyl-acyl carrier protein thioesterase, chloroplastic (Fragment)				-2.08
Cc07_g15410	Acyl-coenzyme A oxidase 2, peroxisomal				1.56
Cc02_g39890	3-ketoacyl-CoA synthase 1		-1.92		-2.45
Cc02_g37010	Putative Lysophosphatidylcholine acyltransferase 2				1.77
Cc09_g04120	Acyl-[acyl-carrier-protein] desaturase, chloroplastic				-1.89
Cc02_g21710	(3R)-hydroxymyristoyl-[acyl-carrier-protein] dehydratase				-1.66
Cc09_g09220	3-oxoacyl-[acyl-carrier-protein] synthase I, chloroplastic				-1.48
Cc01_g12270	Putative 3-hydroxyacyl-CoA dehydratase 2				-2.4
Cc08_g07790	3-ketoacyl-CoA synthase 10		-2.68		-1.78
Cc06_g16000	Enoyl-[acyl-carrier-protein] reductase [NADH], chloroplastic				-2.02
Cc00_g14020	3-ketoacyl-CoA synthase 21	-5.66	-6.72
Cc07_g08840	3-ketoacyl-CoA synthase 6	-3.07	-5.22
Cc04_g01940	Protein HOTHEAD	-9.29	-5.3
Cc03_g04540	3-ketoacyl-CoA synthase 17		3.72
Cc02_g24750	Carotenoid cleavage dioxygenase 7, chloroplastic	7.24	8.59		7.7
Cc05_g01440	4-hydroxyphenylpyruvate dioxygenase		2.36		2.61
Cc05_g11510	Homogentisate 1,2-dioxygenase		1.72		1.49
Cc02_g33780	Probable linoleate 9S-lipoxygenase 5				2.09
Cc03_g03580	Linoleate 9S-lipoxygenase 5, chloroplastic			3.18	2.31
Cc01_g04060	Linoleate 13S-lipoxygenase 2-1, chloroplastic				-2.32
Cc08_g05610	Probable carotenoid cleavage dioxygenase 4, chloroplastic		-6.88		-4.11
Cc02_g33790	Probable linoleate 9S-lipoxygenase 5		2.68
Cc02_g33320	Probable linoleate 9S-lipoxygenase 5	3.69
