# Supplementary material for: Overexpression of Water-Responsive Genes Promoted by Elevated CO2 Reduces ROS and Enhances Drought Tolerance in Coffea Species
Source: Int J Mol Sci. 2023 Feb 6;24(4):3210. doi: 10.3390/ijms24043210 (PMC9966387; doi:10.3390/ijms24043210)
Supplement: Supplementary file 1 [file ijms-24-03210-s001.zip › Table_S10.xlsx]

## Sheet: Icatu
Gene ID	Protein Name	aCO2		eCO2
		MWD	SWD	MWD	SWD
LOC113697821	probable xyloglucan endotransglucosylase/hydrolase protein 6	-4.72	-12.31		-11.17
LOC113741996	late embryogenesis abundant protein Dc3-like		5.51		7.19
LOC113704200	homeobox-leucine zipper protein ATHB-12-like	4.5	4.83		6.75
LOC113727829	galactinol synthase 2-like	2.99	4.29		6.07
LOC113733000	galactinol synthase 2-like		4.89	3.45	5.79
LOC113743599	NAC domain-containing protein 72-like		3.84		5.41
LOC113740436	late embryogenesis abundant protein Dc3-like		3.58		6.1
LOC113727830	galactinol synthase 2-like		4.91		5.43
LOC113700062	serine/threonine-protein kinase SAPK1-like isoform X3		-2.88		-4
LOC113702113	serine/threonine-protein kinase SAPK1-like isoform X3		-3.15		-4.26
LOC113732068	protein Eceriferum 1-like		-4.2		-5.03
LOC113729880	homeobox-leucine zipper protein ATHB-12-like	3.79	3.72		3.63
LOC113725148	beta-fructofuranosidase, soluble isoenzyme I-like isoform X2				2.5
LOC113689826	NAC domain-containing protein 72-like		3.83		4.86
LOC113712167	Low Quality Protein: phosphoprotein ECPP44-like				2.23
LOC113742697	protein Aspartic Protease In Guard Cell 1-like	-3.81	-6.63		-5.62
LOC113740136	protein Aspartic Protease In Guard Cell 1-like	-3.8	-6.26		-4.93
LOC113713327	annexin D1-like		2.13		3.2
LOC113714504	bZIP transcription factor 46-like				2.24
LOC113697378	temperature-induced lipocalin-1-like				2.68
LOC113695700	protein LE25-like		3.46		4.65
LOC113736251	beta-amylase 1, chloroplastic-like				2.55
LOC113707439	LRR receptor-like serine/threonine-protein kinase Erecta isoform X1		-3.62		-3.59
LOC113692069	myb-related protein 306-like		-2.06		-2.55
LOC113730173	beta-fructofuranosidase, soluble isoenzyme I-like isoform X2				2.1
LOC113734385	beta-amylase 1, chloroplastic-like				2.24
LOC113720826	homeobox-leucine zipper protein ATHB-7-like	3.9	3.7		3.46
LOC113740137	protein Aspartic Protease In Guard Cell 1-like				4.05
LOC113702672	LRR receptor-like serine/threonine-protein kinase Erecta				-2.83
LOC113725645	transcription factor Divaricata-like		2.42		2.52
LOC113740563	HVA22-like protein e	4.25	3.96		4.65
LOC113726525	zinc finger protein ZAT10-like		4.46		3.54
LOC113699393	homeobox-leucine zipper protein HAT22-like		2.34		2.36
LOC113738233	sugar transport protein 13-like		2.78		2.87
LOC113732999	galactinol synthase 2-like		2.6		3.19
LOC113740410	HVA22-like protein e	4.94	4.7		4.61
LOC113717599	protein Early-Responsive To Dehydration 7, chloroplastic-like				2.56
LOC113716433	transcription factor MYB124		-2.13		-2.42
LOC113691904	myb-related protein 306-like		-1.89		-2.01
LOC113706865	chitinase-like protein 2	-3.26	-3.51		-2.9
LOC113742464	aldehyde dehydrogenase family 7 member B4-like				1.74
LOC113716416	acidic endochitinase-like		-4.09		-5.94
LOC113691442	Low Quality Protein: CBL-interacting serine/threonine-protein kinase 6-like				2.05
LOC113735055	basic endochitinase-like	-4.17	-7.54		-5.58
LOC113688101	protein THYLAKOID FORMATION1, chloroplastic				-1.38
LOC113697541	remorin 4.1-like				1.47
LOC113742753	aquaporin TIP2-1	-3.25	-5.97		-4.38
LOC113706564	protein phosphatase 2C 51-like		4.43		6.06
LOC113726435	Abscisic Acid-Insensitive 5-like protein 7 isoform X2				1.69
LOC113725206	Low Quality Protein: ethylene-responsive transcription factor ERF106				-2.69
LOC113708853	aquaporin PIP2-7		-2.02		-1.97
LOC113692190	18 kDa seed maturation protein-like				4.53
LOC113718664	ethylene-responsive transcription factor ABR1-like				2.16
LOC113724934	acidic endochitinase SE2-like				2.93
LOC113694515	calmodulin-binding protein 25-like				1.8
LOC113733849	galactinol synthase 2-like isoform X3				2.62
LOC113702816	plastidal glycolate/glycerate translocator 1, chloroplastic				-1.58
LOC113697396	CBL-interacting serine/threonine-protein kinase 6-like				1.85
LOC113718757	histidine kinase 4-like		-2.57		-2
LOC113743471	chlorophyll a-b binding protein 36, chloroplastic		-2.49		-2.17
LOC113689822	chlorophyll a-b binding protein 36, chloroplastic		-2.4		-2.09
LOC113711139	Low Quality Protein: zinc finger protein ZAT10-like		3.09		2.16
LOC113718268	Low Quality Protein: sucrose synthase 2-like		2.96		2.51
LOC113718216	protein Senescence-Associated Gene 21, mitochondrial-like				1.63
LOC113732513	annexin D3-like isoform X4				-3.63
LOC113690342	acidic endochitinase-like		-4.3		-3.18
LOC113742500	aldehyde dehydrogenase family 7 member B4-like				1.65
LOC113703008	protein phosphatase 2C 51-like		5.62		5.54
LOC113730387	probable aquaporin PIP1-2				2.62
LOC113707447	pleiotropic drug resistance protein 1-like				-2.04
LOC113698468	protein Cellulose Synthase Interactive 1-like				-2.25
LOC113695699	18 kDa seed maturation protein-like				3.53
LOC113703384	chitinase-like protein 2	-3.1	-4.02		-2.7
LOC113736371	glycine-rich RNA-binding protein 4, mitochondrial-like				1.6
LOC113707285	plastidal glycolate/glycerate translocator 1, chloroplastic-like				-1.6
LOC113733488	late embryogenesis abundant protein-like				3.62
LOC113707992	aquaporin PIP2-2-like				2.43
LOC113692018	UDP-glycosyltransferase 71K1-like				3.43
LOC113716753	protein Early-Responsive To Dehydration 7, chloroplastic-like				1.59
LOC113701593	PLAT domain-containing protein 3-like	-7.32	-8		-6.22
LOC113735267	sucrose synthase 2-like		2.42		1.49
LOC113708883	LRR receptor-like serine/threonine-protein kinase RPK2				-3.62
LOC113692157	transcription factor Divaricata-like				-3.19
LOC113717283	uncharacterized protein LOC113717283 isoform X2	-1.87	-2.03		-1.7
LOC113738017	galactinol synthase 2-like				2.6
LOC113691849	protein NLP1-like isoform X1		-2.86		-2.36
LOC113716326	alpha-1,4 glucan phosphorylase L-2 isozyme, chloroplastic/amyloplastic-like isoform X2				-2.56
LOC113694284	calmodulin-binding protein 25-like				1.38
LOC113732575	protein zinc induced facilitator-like 1-like isoform X4				-1.52
LOC113734216	auxin-responsive protein IAA14-like	-2.59	-3.41		-2.09
LOC113707437	abscisic acid receptor PYR1-like				-1.77
LOC113701491	protein Cellulose Synthase Interactive 1-like		-1.95		-1.88
LOC113742299	protein Aspartic Protease In Guard Cell 1-like	-4.16	-7.11		-4.32
LOC113731163	WRKY transcription factor WRKY24-like				1.63
LOC113689804	glycine-rich RNA-binding protein 4, mitochondrial-like isoform X2				1.55
LOC113732870	stress-related protein-like				1.42
LOC113735612	E3 ubiquitin-protein ligase MARCH1-like		-2.09		-1.6
LOC113742441	protein Aspartic Protease In Guard Cell 1-like				-8.98
LOC113699192	RNA-binding protein 24-like isoform X6				2.1
LOC113742142	pleiotropic drug resistance protein 1-like				1.43
LOC113698380	Low Quality Protein: proline dehydrogenase 2, mitochondrial-like				3.08
LOC113701327	probable hexokinase-like 2 protein isoform X1		-3.13		-2.27
LOC113738429	Low Quality Protein: transcription factor MYBS1-like				-1.9
LOC113699014	myb-related protein 306-like	-4.01	-4.07		-3.23
LOC113692189	late embryogenesis abundant protein 46-like				4.64
LOC113706149	probable LRR receptor-like serine/threonine-protein kinase At1g34110				-4.01
LOC113714561	squalene monooxygenase-like		-2.59		-2.33
LOC113732515	annexin D3-like				-1.99
LOC113691066	peroxidase 3-like		3.71		2.83
LOC113741887	ethylene-responsive transcription factor WIN1-like				-4.46
LOC113729974	acidic endochitinase SE2-like				4.15
LOC113707187	aquaporin TIP4-1-like		-5.45		-4.93
LOC113701246	proline dehydrogenase 2, mitochondrial-like isoform X1				2.6
LOC113710396	LRR receptor-like serine/threonine-protein kinase RPK2				-2.68
LOC113699229	UDP-glycosyltransferase 74E2-like				2.46
LOC113709223	aquaporin TIP1-3-like	-4.55	-4.35		-3.52
LOC113695229	putative disease resistance protein At1g50180				-2.68
LOC113710329	aquaporin PIP2-4-like		-2.9		-1.84
LOC113712121	wall-associated receptor kinase 2-like		-3.8		-1.82
LOC113702920	abscisic acid receptor PYR1-like				-1.67
LOC113695179	transcription factor DIVARICATA-like				-2.61
LOC113742144	pleiotropic drug resistance protein 1-like				-1.56
LOC113726161	non-specific lipid-transfer protein 1-like	-4.25	-5.7
LOC113716691	protein Aspartic Protease In Guard Cell 1-like	-2.96	-4.37
LOC113719150	acidic endochitinase-like	-3.74
LOC113719011	protein Aspartic Protease In Guard Cell 1-like	-2.12	-2.32
LOC113716360	acidic endochitinase-like	-4.1
LOC113689755	F-box/LRR-repeat MAX2 homolog A-like	3.32	2.54
LOC113701531	AAA-ATPase ASD, mitochondrial-like	-3.9	-3.51
LOC113737208	basic endochitinase-like	-4.41	-7.12
LOC113731075	non-specific lipid-transfer protein 1-like	-3.13	-3.56
LOC113700985	AAA-ATPase ASD, mitochondrial-like	-2.26	-2.12
LOC113743330	F-box/LRR-repeat MAX2 homolog A-like	2.78
LOC113728077	probable aquaporin PIP1-2	-2.21	-2.61
LOC113696040	aquaporin PIP2-2-like	-3.39
LOC113707625	phenylalanine ammonia-lyase G4-like	-3.04	-3.42
LOC113708818	glycerate dehydrogenase-like		-1.83
LOC113742593	protein Aspartic Protease In Guard Cell 1-like isoform X2		-3.29
LOC113701789	zeaxanthin epoxidase, chloroplastic-like		-2.06
LOC113695827	pathogenesis-related protein PR-1-like		-4.83
LOC113732919	probable protein phosphatase 2C 34		-1.92
LOC113739398	ethylene-responsive transcription factor WIN1-like		-7.71
LOC113733193	probable aquaporin PIP1-2		-4.03
LOC113727571	phenylalanine ammonia-lyase G4-like		-3.05
LOC113692484	PHD finger protein ALFIN-LIKE 4-like		-1.98
LOC113742898	transcription factor MYBS1-like		-2.4
LOC113708828	aquaporin PIP2-4-like		-2.4
LOC113713775	Low Quality Protein: endoplasmin homolog		-2.07
LOC113717922	acidic endochitinase-like
LOC113733440	WRKY DNA-binding transcription factor 70-like
LOC113732511	annexin D4-like
LOC113698209	aspartic proteinase nepenthesin-1-like
LOC113731572	squalene monooxygenase-like
LOC113693754	non-specific lipid-transfer protein 1-like
LOC113729310	E3 ubiquitin-protein ligase RDUF2-like

## Sheet: CL153
Gene ID	Protein Name	aCO2		eCO2
		MWD	SWD	MWD	SWD
Cc07_g07560	Probable xyloglucan endotransglucosylase/hydrolase protein 6	-6,9	-5,85
Cc04_g09640	Protein Aspartic Protease In Guard Cell 1	-5,03	-4,92
Cc04_g07360	Putative Protein Aspartic Protease In Guard Cell 1	4,89	4,07		3,96
Cc04_g07380	Putative Protein Aspartic Protease In Guard Cell 1	4,27	3,17		2,8
Cc07_g10030	Dehydrin DH1a	6,05	5,47		2,37
Cc01_g11790	Mitogen-activated protein kinase 3				1,45
Cc06_g09540	Multiprotein-bridging factor 1c				2,34
Cc04_g08280	Putative movement protein binding protein 2C		-2,86		-1,92
Cc06_g15980	18 kDa seed maturation protein	9,18	8,79		2,92
Cc04_g07350	Putative Protein Aspartic Protease In Guard Cell 1		-5,86
Cc04_g07330	Putative Protein Aspartic Protease In Guard Cell 1	-7,93	-8,16
Cc02_g17270	Putative Late embryogenesis abundant protein	4,32	3,58
Cc01_g08980	Late embryogenesis abundant (LEA) hydroxyproline-rich glycoprotein family		-3,25
Cc04_g07370	Putative Protein Aspartic Protease In Guard Cell 1		-3,48
Cc02_g15480	Cellulose synthase A catalytic subunit 8 [UDP-forming]		-5,28
Cc07_g15660	C2 domain-containing protein		-1,73
